# Supplementary material for: Genome-scale activation screen reveals lncRNA HNF1A-AS1 as a novel therapeutic target for pancreatic cancer metastasis
Source: Research Square preprint supplement (doi:10.21203/rs.3.rs-5388928/v1), 2024-12-24
Supplement: Supplementary file 1 [file 33c9a5bc6bbc39bc83d00598.xlsx]

## Sheet: Sheet2
Supplementary Table S1. The primers used in the article
RT-qPCR
GENE	Sequence (5' -> 3')
GAPDH	Forward Primer	GTCTCCTCTGACTTCAACAGCG
	Reverse Primer	ACCACCCTGTTGCTGTAGCCAA
CD44s	Forward Primer	ACAGACAGAATCCCTGCTACCAGAGA
	Reverse Primer	GCCACTGTTGATCACTAGCTTTTTC
U6	Forward Primer	CTCGCTTCGGCAGCACAT
	Reverse Primer	TTTGCGTGTCATCCTTGCG
HROB	Forward Primer	GAGGGGCCTGAACAAGACG
	Reverse Primer	AGGATTGGTATGGCCTCACTG
PSMA4	Forward Primer	AGTGTGGCAGGCATAACTTCT
	Reverse Primer	TCACAAGGTATTGGCTCCTGA
RER1	Forward Primer	TGGGAAACCTTCGGTGGTG
	Reverse Primer	GGGTGTGGACTTGTCTAGCC
TIMMDC1	Forward Primer	TATTTCCCCGAGTCTTTGCTGC
	Reverse Primer	GTAATAGGGCTCTGGGACGTAG
HNF1A-AS1	Forward Primer	AATCTCCTGCTGTCCTCTTC
	Reverse Primer	AGGGCTCATCCTAACACTTT
ZNF197-AS1	Forward Primer	CCAGACTGGAAAGCTTGAGG
	Reverse Primer	TAGGCACTCCAAGCTCAGGT
HDAC11-AS1	Forward Primer	GTTGCTTCAGCCTTCTGGTC
	Reverse Primer	CATCACGCCCAGCTAATTTT
MYO16-AS1	Forward Primer	CCGCATTCTGCACACTAAGA
	Reverse Primer	GACCATGGGGAAACCTACCT
MBNL1-AS1	Forward Primer	TGCAGAAAGTTCCTGTGACG
	Reverse Primer	AGACAATGGGAGGCAAAATG
LINC01277	Forward Primer	AATGACCCCCTTGGATTTTC
	Reverse Primer	ATCTCGGAATCCCCCATAAC
LINC00540	Forward Primer	GCTTCCGTTCTGTTTTCTGC
	Reverse Primer	GAGGCCACACAGCTCCTAAG
PVRL3-AS1	Forward Primer	TAGCGGTGCATCAAGCATAG
	Reverse Primer	TCATGGCTTGGAAAGAATCC
TIPARP-AS1	Forward Primer	TCGGTACAAAGGGCAGTCTC
	Reverse Primer	CTCCTGTCGTCCGTTCTCTC
LINC00936	Forward Primer	CTGGCGAGGACAGATTAAGG
	Reverse Primer	AGCTCTCTTCCCCAAAGAGG
PCR
TIMMDC1	Forward Primer	CATCATTGGCTGGGTGTATG
	Reverse Primer	CCTGCAATTACAAAATGGCTTA
RER1	Forward Primer	TGTCTGAAGGGGACAGTGTG
	Reverse Primer	AAGGATCCACTTTGGGAGAAA
PSMA4	Forward Primer	ACATTGGCTGGGATAAGCAC
	Reverse Primer	TCTTCTCACGCTCAGCTTTG
HROB	Forward Primer	AAAGCCCGGGTAGTTGATCT
	Reverse Primer	AACAGGAAGGTGACCCACAG
CD44	Forward Primer	CCGCTATGTCCAGAAAGGAG
	Reverse Primer	CTGTCTGTGCTGTCGGTGAT
HNF1A-AS1 ΔBR1	Forward Primer	ACATGGCGAAACCTCATTTC
	Reverse Primer	TTGAGGCAGGGTCTCACTCT
HNF1A-AS1 ΔBR1	Forward Primer	ACATGGCGAAACCTCATTTC
	Reverse Primer	TTGAGGCAGGGTCTCACTCT
HNF1A-AS1 ΔBR1	Forward Primer	TGGGTAACTCCAACCCTCTG
	Reverse Primer	GAGAAGTGGGGTCGTCATGT
HNF1A-AS1 ΔBR1	Forward Primer	ACATGGCGAAACCTCATTTC
	Reverse Primer	TTGAGGCAGGGTCTCACTCT
HNF1A-AS1 ΔBR1	Forward Primer	GGCAGAAGAATCGCTTGAAC
	Reverse Primer	GAGAAGTGGGGTCGTCATGT
HNF1A-AS1 Region1	Forward Primer	GACCATCCTGCCTAACATGG
	Reverse Primer	GATCTCGGCTCACTGCAAG
HNF1A-AS1 Region2	Forward Primer	GAGGCTGAGGCAGGAGAAT
	Reverse Primer	AGGGAGTCTCGCTCTGTCG
HNF1A-AS1 Region3	Forward Primer	GACAGGGTCTCCTTCTGTCG
	Reverse Primer	AAAATTAGCGAGGCATGGTG
HNF1A-AS1 Region4	Forward Primer	CCTCAGAGCTGGGCTTTAAGT
	Reverse Primer	GGGTGACAAAGTGAGGCTCT
HNF1A-AS1 Region5	Forward Primer	ACTACAGGCACACACCACCA
	Reverse Primer	GTGGCTCACGCCTATAATCC
HNF1A-AS1 Region6	Forward Primer	GCCTGGGCGATAGAGTAACA
	Reverse Primer	GCCTCCCGTTAGTACATCCA
