# Supplementary material for: Genome-scale activation screen reveals lncRNA HNF1A-AS1 as a novel therapeutic target for pancreatic cancer metastasis
Source: Research Square preprint supplement (doi:10.21203/rs.3.rs-5388928/v1), 2024-12-24
Supplement: Supplementary file 3 [file 42e237669cc62706ef2c1d5e.docx]

| HNF1A-AS1 Expression | |  |  |  |  |  |
| --- | --- | --- | --- | --- | --- | --- |
| Features |  | *n* | Low | High | X² | P-value |
| All cases | | 80 | 40 | 40 |  |  |
| Age | |  |  |  | 0.654 | 0.201 |
|  | ＜60 | 42 | 22 | 20 |  |  |
|  | ≥60 | 38 | 18 | 20 |  |  |
| Gender | |  |  |  | 0.651 | 0.205 |
|  | Man | 46 | 24 | 22 |  |  |
|  | Female | 34 | 16 | 18 |  |  |
| Histological type | |  |  |  | 0.775 | 0.082 |
|  | Adenocarcinoma | 65 | 32 | 33 |  |  |
|  | Nonadenocarcinoma | 15 | 8 | 7 |  |  |
| TNM stage | |  |  |  | 6.275 | 0.012 |
|  | Ⅰand Ⅱ | 68 | 38 | 30 |  |  |
|  | Ⅲ and Ⅳ | 12 | 2 | 10 |  |  |
| Distant metastasis | |  |  |  | 6.135 | 0.013 |
|  | Negative | 71 | 39 | 32 |  |  |
|  | Positive | 9 | 1 | 8 |  |  |
| Perinerual invasion | |  |  |  | 7.5 | 0.006 |
|  | Negative | 48 | 30 | 18 |  |  |
|  | Positive | 32 | 10 | 22 |  |  |
| Lymph node metastasis | |  |  |  | 6.054 | 0.014 |
|  | No | 41 | 26 | 15 |  |  |
|  | Yes | 39 | 14 | 25 |  |  |

**Table S3. Correlation between pancreatic cancer characteristics and HNF1A-AS1 expression levels.**
