# Supplementary material for: Genome-scale activation screen reveals lncRNA HNF1A-AS1 as a novel therapeutic target for pancreatic cancer metastasis
Source: Research Square preprint supplement (doi:10.21203/rs.3.rs-5388928/v1), 2024-12-24
Supplement: Supplementary file 4 [file 84351fcf350d8efdf0480f4a.xlsx]

## Sheet: Sheet1
Supplementary Table 2. Metastatic tumor vs primary tumor lncRNA sequencing
Gene	GeneName		Biotype
ENSG00000241388	HNF1A-AS1	Up	antisense
ENSG00000253878	RP11-347C18.3	Up	sense_intronic
ENSG00000260366	CTD-2639E6.4	Up	sense_overlapping
ENSG00000232415	CTB-51J22.1	Up	antisense
ENSG00000229621	AC018742.1	Up	lincRNA
ENSG00000279072	RP13-580B18.4	Up	lincRNA
ENSG00000258404	RP11-1029J19.5	Up	lincRNA
ENSG00000233081	RP11-440G5.2	Up	lincRNA
ENSG00000269524	CTB-83J4.1	Up	lincRNA
ENSG00000244502	HDAC11-AS1	Up	antisense
ENSG00000253715	RP11-706C16.8	Up	antisense
ENSG00000227045	RP11-98D18.1	Up	antisense
ENSG00000279739	CTB-105N12.2	Up	TEC
ENSG00000256152	RP11-463O12.3	Up	lincRNA
ENSG00000236107	AC010127.3	Up	antisense
ENSG00000233593	RP4-665J23.1	Up	processed_transcript
ENSG00000262152	LA16c-380H5.1	Up	processed_transcript
ENSG00000260790	RP11-21M24.2	Up	antisense
ENSG00000196668	LINC00173	Up	processed_transcript
ENSG00000237864	LINC00322	Up	lincRNA
ENSG00000266969	RP11-773H22.4	Up	antisense
ENSG00000229337	AC079305.8	Up	antisense
ENSG00000229688	ISPD-AS1	Up	antisense
ENSG00000241475	RP4-781K5.5	Up	lincRNA
ENSG00000274427	RP11-972P1.10	Up	sense_intronic
ENSG00000249790	RP11-20D14.6	Up	lincRNA
ENSG00000245750	DRAIC	Up	lincRNA
ENSG00000238042	RP11-815M8.1	Up	lincRNA
ENSG00000224729	PCOLCE-AS1	Up	antisense
ENSG00000277144	RP11-59H7.4	Up	lincRNA
ENSG00000237429	RP1-159A19.4	Up	antisense
ENSG00000231473	LINC00441	Up	lincRNA
ENSG00000279913	AP001962.3	Up	TEC
ENSG00000214955	AP000318.2	Up	lincRNA
ENSG00000255314	RP11-702F3.3	Up	lincRNA
ENSG00000206129	CTD-2008L17.2	Up	lincRNA
ENSG00000267048	RP11-566K11.7	Up	processed_transcript
ENSG00000248858	FLJ46284	Up	processed_transcript
ENSG00000248664	CTC-498J12.3	Up	antisense
ENSG00000225877	AC004603.4	Up	lincRNA
ENSG00000271991	RP11-79O8.1	Up	lincRNA
ENSG00000272872	LL22NC03-N14H11.1	Up	sense_intronic
ENSG00000254267	KB-1458E12.1	Up	lincRNA
ENSG00000266341	RP5-890E16.4	Up	antisense
ENSG00000259370	RP11-1069G10.1	Up	antisense
ENSG00000250061	RP11-541P9.3	Up	antisense
ENSG00000257759	RP11-486O13.4	Up	lincRNA
ENSG00000255970	RP11-43N5.1	Up	lincRNA
ENSG00000251676	RP11-614F17.2	Up	lincRNA
ENSG00000273797	RP11-1046B16.3	Up	sense_intronic
ENSG00000268324	LRRC2-AS1	Up	antisense
ENSG00000234997	AC016745.3	Up	antisense
ENSG00000225235	INTS6L-AS1	Up	antisense
ENSG00000235888	AF064858.8	Up	lincRNA
ENSG00000224023	FLJ37035	Up	lincRNA
ENSG00000273729	RP11-7F17.8	Up	antisense
ENSG00000257038	RP11-800A3.7	Up	antisense
ENSG00000231789	PIK3CD-AS2	Up	antisense
ENSG00000231964	RP11-67C2.2	Up	antisense
ENSG00000278456	RP11-66B24.9	Up	antisense
ENSG00000228261	RP11-127L20.3	Up	lincRNA
ENSG00000267193	RP11-116O18.3	Up	antisense
ENSG00000253430	RP11-14I17.2	Up	sense_intronic
ENSG00000234311	RP11-432J24.3	Up	antisense
ENSG00000185168	LINC00482	Up	lincRNA
ENSG00000229563	LINC01204	Up	lincRNA
ENSG00000230316	FEZF1-AS1	Up	antisense
ENSG00000258791	LINC00520	Up	lincRNA
ENSG00000246731	MGC16275	Up	antisense
ENSG00000258450	RP11-649E7.7	Up	sense_intronic
ENSG00000260735	RP11-72I8.1	Up	antisense
ENSG00000224292	AF196972.9	Up	antisense
ENSG00000237721	AF064858.11	Up	lincRNA
ENSG00000245904	RP11-796E2.4	Up	antisense
ENSG00000224388	BACE2-IT1	Up	antisense
ENSG00000273133	RP11-799M12.2	Up	antisense
ENSG00000259678	RP11-707P17.1	Up	antisense
ENSG00000255621	RP11-377D9.3	Up	lincRNA
ENSG00000231412	CTC-490G23.2	Up	lincRNA
ENSG00000269463	RP11-727F15.13	Up	sense_intronic
ENSG00000214145	LINC00887	Up	lincRNA
ENSG00000232504	ST3GAL5-AS1	Up	lincRNA
ENSG00000229267	AC072062.1	Up	antisense
ENSG00000266401	RP11-874J12.4	Up	antisense
ENSG00000238010	RP11-123K19.2	Up	sense_intronic
ENSG00000275512	RP11-322E11.2	Up	lincRNA
ENSG00000260954	LA16c-425C2.1	Up	sense_intronic
ENSG00000260186	RP11-481J2.2	Up	lincRNA
ENSG00000280375	RP13-204A15.5	Up	TEC
ENSG00000259712	CTD-2184D3.5	Up	antisense
ENSG00000228013	RP11-350G8.5	Up	antisense
ENSG00000234884	CTA-407F11.8	Up	antisense
ENSG00000277050	RP11-102G14.1	Up	antisense
ENSG00000223935	AC008074.3	Up	antisense
ENSG00000267582	CTD-3252C9.2	Up	antisense
ENSG00000239911	PRKAG2-AS1	Up	antisense
ENSG00000228044	RP4-781K5.4	Up	lincRNA
ENSG00000231858	AC067945.4	Up	processed_transcript
ENSG00000275613	CTD-3194G12.2	Up	lincRNA
ENSG00000230392	RP5-1139I1.1	Up	lincRNA
ENSG00000248810	RP11-362F19.1	Up	lincRNA
ENSG00000197099	RP11-573D15.8	Up	antisense
ENSG00000228791	THRB-AS1	Up	processed_transcript
ENSG00000283408	RP1-242N11.1	Up	lincRNA
ENSG00000254604	AP000487.6	Up	antisense
ENSG00000228509	AC006460.2	Up	antisense
ENSG00000260604	RP1-140K8.5	Up	lincRNA
ENSG00000225764	P3H2-AS1	Up	antisense
ENSG00000262624	RP11-104H15.9	Up	antisense
ENSG00000248890	HHIP-AS1	Up	antisense
ENSG00000251281	CTD-2066L21.2	Up	lincRNA
ENSG00000253596	CTD-2320G14.2	Up	antisense
ENSG00000267123	CTD-2357A8.3	Up	lincRNA
ENSG00000249602	RP11-98D18.3	Up	antisense
ENSG00000262155	RP11-266L9.5	Up	lincRNA
ENSG00000259065	RP5-1021I20.1	Up	antisense
ENSG00000226816	AC005082.12	Up	lincRNA
ENSG00000256982	CTD-2555A7.2	Up	lincRNA
ENSG00000275857	AC009133.21	Up	antisense
ENSG00000279106	RP11-426C22.1	Up	TEC
ENSG00000255097	RP11-5L12.1	Up	sense_intronic
ENSG00000248936	RP11-36B15.1	Up	antisense
ENSG00000278011	RP11-900F13.2	Up	lincRNA
ENSG00000233056	ERVH48-1	Up	lincRNA
ENSG00000235741	RP5-866L20.1	Up	lincRNA
ENSG00000234210	AC006372.4	Up	lincRNA
ENSG00000233296	AC092159.2	Up	antisense
ENSG00000226645	AP006216.10	Up	antisense
ENSG00000270562	RP11-154H23.3	Up	lincRNA
ENSG00000260377	RP11-646E18.4	Up	lincRNA
ENSG00000234471	AC147651.1	Up	lincRNA
ENSG00000234540	RP3-448I9.1	Up	lincRNA
ENSG00000279587	RP1-278D1.2	Up	TEC
ENSG00000231971	RP11-557H15.3	Up	lincRNA
ENSG00000259062	ACTN1-AS1	Up	antisense
ENSG00000259968	RP11-428C6.2	Up	lincRNA
ENSG00000237017	AC012314.8	Up	antisense
ENSG00000225945	RP3-441A12.1	Up	antisense
ENSG00000232774	FLJ22447	Up	lincRNA
ENSG00000255507	RP11-535A19.2	Down	antisense
ENSG00000224216	RP13-228J13.1	Down	antisense
ENSG00000227591	RP1-28O10.1	Down	antisense
ENSG00000231441	RP11-472M19.2	Down	antisense
ENSG00000256995	RP11-114G22.1	Down	lincRNA
ENSG00000283209	RP11-347L15.1	Down	sense_intronic
ENSG00000234235	BOK-AS1	Down	antisense
ENSG00000233930	KRTAP5-AS1	Down	antisense
ENSG00000231729	ARHGEF9-IT1	Down	sense_intronic
ENSG00000271614	LINC00936	Down	lincRNA
ENSG00000229619	MBNL1-AS1	Down	antisense
ENSG00000243926	TIPARP-AS1	Down	antisense
ENSG00000236242	MYO16-AS1	Down	antisense
ENSG00000233509	ZNF197-AS1	Down	antisense
ENSG00000229017	LINC01277	Down	lincRNA
ENSG00000276476	LINC00540	Down	lincRNA
ENSG00000242242	PVRL3-AS1	Down	antisense
ENSG00000206195	DUXAP8	Down	processed_transcript
ENSG00000232692	AP001596.6	Down	antisense
ENSG00000276012	RP11-397O8.7	Down	antisense
ENSG00000257327	RP11-650K20.3	Down	lincRNA
ENSG00000237807	RP11-400K9.4	Down	lincRNA
ENSG00000278090	RP11-6O2.2	Down	lincRNA
ENSG00000229660	RP5-1142J19.1	Down	lincRNA
ENSG00000273001	RP11-118K6.3	Down	lincRNA
ENSG00000267786	AF038458.3	Down	lincRNA
ENSG00000225206	MIR137HG	Down	lincRNA
ENSG00000277991	CH507-338C24.1	Down	lincRNA
ENSG00000235051	RP11-637O19.2	Down	antisense
ENSG00000273113	RP11-367H1.1	Down	lincRNA
ENSG00000212743	RP11-563J2.3	Down	lincRNA
ENSG00000253433	NCRNA00250	Down	lincRNA
ENSG00000224184	MIR3681HG	Down	lincRNA
ENSG00000236031	RP11-269F20.1	Down	antisense
ENSG00000257178	MIR10A	Down	sense_intronic
ENSG00000258651	RP11-545M17.1	Down	lincRNA
ENSG00000279584	AC005593.2	Down	TEC
ENSG00000271755	RP1-153G14.4	Down	lincRNA
ENSG00000250451	HOXC-AS1	Down	antisense
ENSG00000179066	CTD-2527I21.15	Down	lincRNA
ENSG00000258334	RP11-161H23.9	Down	antisense
ENSG00000267852	CTB-133G6.2	Down	antisense
ENSG00000225655	PGM5-AS1	Down	lincRNA
ENSG00000250697	CTD-2066L21.3	Down	lincRNA
ENSG00000234199	LINC01191	Down	lincRNA
ENSG00000215458	AATBC	Down	antisense
ENSG00000243243	AC073130.3	Down	antisense
ENSG00000269729	AC006262.4	Down	lincRNA
ENSG00000279114	RP3-425C14.5	Down	TEC
ENSG00000183154	RP11-863K10.7	Down	antisense
ENSG00000280216	RP3-333H23.9	Down	TEC
ENSG00000255571	MIR9-3HG	Down	lincRNA
ENSG00000257613	LINC01481	Down	lincRNA
ENSG00000254130	CTB-7E3.1	Down	lincRNA
ENSG00000262223	RP11-1055B8.3	Down	lincRNA
ENSG00000247699	CTB-127C13.1	Down	antisense
ENSG00000228839	PIK3IP1-AS1	Down	antisense
ENSG00000235939	RP11-123B3.2	Down	antisense
ENSG00000269989	RP11-635N19.3	Down	sense_intronic
ENSG00000267069	RP11-64C12.8	Down	lincRNA
ENSG00000228561	RP11-114M1.1	Down	lincRNA
ENSG00000254460	RP11-939C17.4	Down	sense_intronic
ENSG00000279568	RP11-20I23.5	Down	TEC
ENSG00000271172	RP11-660M5.1	Down	lincRNA
ENSG00000235781	XXbac-BPG249D20.9	Down	antisense
ENSG00000280149	RP4-751H13.5	Down	TEC
ENSG00000270074	RP11-351I21.11	Down	lincRNA
ENSG00000179219	LINC00311	Down	lincRNA
ENSG00000248964	RP11-94H18.1	Down	lincRNA
ENSG00000276075	CTD-2012K14.8	Down	antisense
ENSG00000223714	RP5-1172N10.2	Down	lincRNA
ENSG00000256299	RP11-989F5.3	Down	lincRNA
ENSG00000237685	RP11-360O19.4	Down	antisense
ENSG00000259687	LINC01220	Down	lincRNA
ENSG00000235180	LINC00601	Down	lincRNA
ENSG00000272168	CASC15	Down	lincRNA
ENSG00000259052	AL157871.2	Down	sense_overlapping
ENSG00000235058	ZMYND10-AS1	Down	antisense
ENSG00000264964	RP11-888D10.3	Down	lincRNA
ENSG00000236256	DIAPH2-AS1	Down	antisense
ENSG00000236081	ELFN1-AS1	Down	lincRNA
ENSG00000262521	AJ003147.8	Down	lincRNA
ENSG00000203801	LINC00222	Down	lincRNA
ENSG00000222005	LINC01118	Down	lincRNA
ENSG00000273445	RP11-1399P15.1	Down	antisense
ENSG00000223525	RABGAP1L-IT1	Down	sense_intronic
ENSG00000278863	RP11-567L7.3	Down	TEC
ENSG00000261838	RP11-303E16.6	Down	antisense
ENSG00000235908	RHOA-IT1	Down	sense_intronic
ENSG00000214719	AC005562.1	Down	processed_transcript
ENSG00000260166	RP11-863P13.6	Down	lincRNA
ENSG00000225420	AC104134.2	Down	antisense
ENSG00000232987	LINC01219	Down	lincRNA
ENSG00000205562	RP11-497E19.1	Down	lincRNA
ENSG00000225434	LINC01504	Down	lincRNA
ENSG00000262966	RP11-85B7.2	Down	antisense
ENSG00000229618	AC011288.2	Down	lincRNA
ENSG00000234230	ZFX-AS1	Down	antisense
ENSG00000258808	RP11-255G12.3	Down	lincRNA
ENSG00000267107	PCAT19	Down	lincRNA
ENSG00000232298	RP11-10N16.3	Down	antisense
ENSG00000271882	KB-1410C5.5	Down	lincRNA
ENSG00000227359	AC017074.2	Down	lincRNA
ENSG00000259230	CTD-2555C10.3	Down	lincRNA
ENSG00000271926	CTD-2376I4.1	Down	lincRNA
ENSG00000254281	KB-1507C5.4	Down	lincRNA
ENSG00000223617	LINC00370	Down	lincRNA
ENSG00000267808	AC018755.17	Down	lincRNA
ENSG00000271941	RP11-188P20.3	Down	antisense
ENSG00000257058	RP11-864I4.4	Down	antisense
ENSG00000267892	CTD-2540F13.2	Down	antisense
ENSG00000223466	AC064834.2	Down	lincRNA
ENSG00000274769	RP11-493E12.3	Down	processed_transcript
ENSG00000254670	CTC-497E21.3	Down	lincRNA
ENSG00000266651	RP11-138I1.3	Down	lincRNA
ENSG00000233536	RP11-867G2.5	Down	lincRNA
ENSG00000249295	RP11-241G9.3	Down	antisense
ENSG00000197934	CYYR1-AS1	Down	antisense
ENSG00000232542	DPYD-IT1	Down	sense_intronic
ENSG00000268309	CTD-3222D19.11	Down	antisense
ENSG00000276488	CTD-2537I9.18	Down	antisense
ENSG00000236153	AC104076.3	Down	antisense
ENSG00000272885	RP11-2H3.6	Down	lincRNA
ENSG00000273424	CTA-223H9.9	Down	lincRNA
ENSG00000278932	bP-21264C1.2	Down	lincRNA
ENSG00000249494	CTB-161M19.4	Down	antisense
ENSG00000230498	RP4-564M11.2	Down	antisense
ENSG00000206532	RP11-553A10.1	Down	lincRNA
ENSG00000248588	CTC-458G6.4	Down	lincRNA
ENSG00000238164	RP3-395M20.8	Down	antisense
ENSG00000225096	XXbac-BPG55C20.7	Down	lincRNA
ENSG00000263063	RP11-388C12.1	Down	lincRNA
ENSG00000224034	RP11-445P17.8	Down	lincRNA
ENSG00000230212	AP000688.14	Down	sense_intronic
ENSG00000227467	LINC01537	Down	lincRNA
ENSG00000273821	RP5-963E22.6	Down	lincRNA
ENSG00000270084	GAS5-AS1	Down	antisense
ENSG00000250041	CTD-2003C8.2	Down	lincRNA
ENSG00000227925	RP11-191N8.2	Down	lincRNA
ENSG00000257219	RP11-54A9.1	Down	lincRNA
ENSG00000258018	RP11-148B3.1	Down	lincRNA
ENSG00000255666	RP11-867G2.6	Down	lincRNA
ENSG00000234626	RP1-149A16.12	Down	antisense
ENSG00000273132	RP11-350J20.12	Down	antisense
ENSG00000225111	AC083900.1	Down	sense_intronic
ENSG00000262721	AC106782.20	Down	sense_overlapping
ENSG00000279187	RP11-455O6.5	Down	TEC
