# Supplementary material for: Genome-scale activation screen reveals lncRNA HNF1A-AS1 as a novel therapeutic target for pancreatic cancer metastasis
Source: Research Square preprint supplement (doi:10.21203/rs.3.rs-5388928/v1), 2024-12-24
Supplement: Supplementary file 6 [file c9d6cd576b11dad22484dd72.xlsx]

## Sheet: SE
					Supplementary Table 4. AsPC-1 Knockdown HNF1A-AS1 vs CON alternative splicing gene list
ID	GeneID	geneSymbol	chr	strand	exonStart_0base	exonEnd	upstreamES	upstreamEE	downstreamES	downstreamEE	ID	IJC_SAMPLE_1	SJC_SAMPLE_1	IJC_SAMPLE_2	SJC_SAMPLE_2	IncFormLen	SkipFormLen	PValue	FDR	IncLevel1	IncLevel2	IncLevelDifference
26614	"ENSG00000114547"	"ROPN1B"	chr3	+	125971116	125971162	125969177	125969400	125972042	125972170	26614	4,2,1	0,0,1	0,0,0	1,3,1	195	149	3.33361e-11	1.98805e-07	1.0,1.0,0.433	0.0,0.0,0.0	0.811
70752	"ENSG00000249859"	"PVT1"	chr8	+	128009589	128009718	127795599	127796071	128070159	128070272	70752	3,12,4	0,4,0	0,1,3	12,6,11	278	149	1.18919e-08	1.97996e-05	1.0,0.617,1.0	0.0,0.082,0.128	0.802
68611	"ENSG00000139112"	"GABARAPL1"	chr12	+	10214668	10214779	10213835	10214187	10218062	10218141	68611	1,5,2	0,0,0	0,3,0	1,1,1	260	149	0.000982445	0.0492351	1.0,1.0,1.0	0.0,0.632,0.0	0.789
71508	"ENSG00000156345"	"CDK20"	chr9	-	87970567	87970630	87969795	87969919	87970775	87970897	71508	2,2,11	0,0,2	0,1,1	4,2,3	212	149	9.97901e-10	3.38929e-06	1.0,1.0,0.794	0.0,0.26,0.19	0.781
32025	"ENSG00000135622"	"SEMA4F"	chr2	+	74657852	74657951	74657564	74657624	74673456	74673576	32025	3,8,14	0,0,0	3,6,5	7,8,11	248	149	4.75175e-14	5.66758e-10	1.0,1.0,1.0	0.205,0.311,0.215	0.756
62966	"ENSG00000103994"	"ZNF106"	chr15	-	42449770	42451954	42448071	42448705	42466052	42466114	62966	1,3,4	0,1,0	0,3,0	2,2,1	298	149	2.57558e-07	0.000184319	1.0,0.6,1.0	0.0,0.429,0.0	0.724
7546	"ENSG00000157350"	"ST3GAL2"	chr16	-	70400695	70401094	70399449	70399533	70438948	70439022	7546	2,2,6	0,0,0	3,3,4	6,10,2	298	149	4.42957e-12	3.16998e-08	1.0,1.0,1.0	0.2,0.13,0.5	0.723
5985	"ENSG00000108786"	"HSD17B1"	chr17	+	42553793	42553887	42553438	42553618	42554404	42554582	5985	19,3,5	0,0,0	12,2,0	4,3,3	243	149	1.04193e-09	3.38929e-06	1.0,1.0,1.0	0.648,0.29,0.0	0.687
8660	"ENSG00000153406"	"NMRAL1"	chr16	-	4469503	4469698	4466152	4466402	4474092	4474166	8660	1,2,8	0,0,0	0,9,0	2,0,3	298	149	1.87228e-06	0.000703809	1.0,1.0,1.0	0.0,1.0,0.0	0.667
61572	"ENSG00000260136"	"AC008915"	chr16	+	23455469	23455530	23452757	23453265	23457427	23457588	61572	3,1,6	0,0,9	0,2,0	6,3,2	210	149	6.537e-05	0.00809367	1.0,1.0,0.321	0.0,0.321,0.0	0.667
28015	"ENSG00000010318"	"PHF7"	chr3	+	52421647	52421754	52420902	52421062	52422759	52422881	28015	1,1,4	0,0,0	10,0,0	0,1,2	256	149	0.00209773	0.0808847	1.0,1.0,1.0	1.0,0.0,0.0	0.667
26711	"ENSG00000173226"	"IQCB1"	chr3	-	121808915	121809009	121807343	121807443	121826050	121826180	26711	6,5,14	0,0,0	9,3,0	2,4,2	243	149	4.00261e-08	4.81411e-05	1.0,1.0,1.0	0.734,0.315,0.0	0.65
49219	"ENSG00000143850"	"PLEKHA6"	chr1	-	204256801	204256888	204250545	204250614	204257352	204257869	49219	2,9,5	0,4,8	0,0,0	3,6,7	236	149	9.30423e-08	9.24789e-05	1.0,0.587,0.283	0.0,0.0,0.0	0.623
22305	"ENSG00000173611"	"SCAI"	chr9	-	125065989	125066058	125055875	125056007	125142632	125142677	22305	2,2,1	0,0,0	8,1,6	8,1,7	218	149	1.13874e-08	1.97996e-05	1.0,1.0,1.0	0.406,0.406,0.369	0.606
19726	"ENSG00000173338"	"KCNK7"	chr11	-	65593309	65593383	65592854	65593210	65593475	65593519	19726	2,2,11	4,0,0	1,0,1	3,3,2	223	149	4.02535e-06	0.00117102	0.25,1.0,1.0	0.182,0.0,0.25	0.606
296	"ENSG00000205560"	"CPT1B"	chr22	-	50573807	50573921	50573519	50573715	50574334	50574419	296	2,4,9	0,2,3	0,0,2	2,3,2	263	149	2.48898e-05	0.00420098	1.0,0.531,0.63	0.0,0.0,0.362	0.6
27982	"ENSG00000189042"	"ZNF567"	chr19	+	36694801	36694876	36689400	36689497	36712385	36712512	27982	2,7,1	0,1,0	3,2,2	4,2,3	224	149	1.47208e-06	0.000619692	1.0,0.823,1.0	0.333,0.399,0.307	0.595
69575	"ENSG00000166260"	"COX11"	chr17	-	54953660	54953759	54951905	54952112	54961118	54961265	69575	2,2,2	0,4,1	0,0,0	4,2,2	248	149	0.000178753	0.0152652	1.0,0.231,0.546	0.0,0.0,0.0	0.592
3274	"ENSG00000064687"	"ABCA7"	chr19	+	1057313	1057429	1056329	1056499	1058617	1058732	3274	6,3,4	1,1,3	0,0,1	8,3,10	265	149	4.57095e-09	9.08655e-06	0.771,0.628,0.428	0.0,0.0,0.053	0.591
58542	"ENSG00000072803"	"FBXW11"	chr5	-	171957596	171957698	171914342	171914405	172006457	172006548	58542	3,1,1	3,1,0	0,0,0	1,8,3	251	149	0.00876699	0.209134	0.372,0.372,1.0	0.0,0.0,0.0	0.581
8128	"ENSG00000149927"	"DOC2A"	chr16	-	30015206	30015262	30013466	30013596	30021182	30021688	8128	9,7,6	5,4,0	9,0,0	10,2,4	205	149	0.00238381	0.0879356	0.567,0.56,1.0	0.395,0.0,0.0	0.577
15699	"ENSG00000229212"	"AC044860"	chr15	-	85208774	85208929	85207467	85207618	85209024	85209115	15699	7,4,2	0,0,0	2,9,4	11,0,8	298	149	2.78322e-07	0.000191517	1.0,1.0,1.0	0.083,1.0,0.2	0.572
26004	"ENSG00000152601"	"MBNL1"	chr3	+	152455541	152455577	152447619	152447773	152459270	152459327	26004	5,2,2	0,0,0	2,0,1	0,2,2	185	149	0.000603134	0.0352636	1.0,1.0,1.0	1.0,0.0,0.287	0.571
30258	"ENSG00000085274"	"MYNN"	chr3	+	169774030	169774097	169773426	169773462	169774264	169774561	30258	0,6,4	12,0,0	0,2,0	4,3,3	216	149	0.000246068	0.0185364	0.0,1.0,1.0	0.0,0.315,0.0	0.562
65170	"ENSG00000025708"	"TYMP"	chr22	-	50529495	50529731	50527587	50527717	50529903	50530032	65170	31,8,15	15,3,3	0,3,0	29,12,10	298	149	4.44089e-16	1.58904e-11	0.508,0.571,0.714	0.0,0.111,0.0	0.561
16130	"ENSG00000169371"	"SNUPN"	chr15	-	75622341	75622490	75620893	75621056	75625665	75625794	16130	4,10,2	8,0,0	3,3,3	9,8,5	298	149	0.00265117	0.0943923	0.2,1.0,1.0	0.143,0.158,0.231	0.556
24755	"ENSG00000129187"	"DCTD"	chr4	-	182916418	182916539	182915460	182915575	182916672	182916857	24755	6,19,20	0,4,0	9,6,1	9,2,5	270	149	3.79052e-05	0.00562789	1.0,0.724,1.0	0.356,0.623,0.099	0.549
62998	"ENSG00000085511"	"MAP3K4"	chr6	+	161098277	161098427	161097079	161097176	161101891	161101992	62998	2,1,4	2,0,1	3,1,0	5,3,7	298	149	0.00793191	0.195603	0.333,1.0,0.667	0.231,0.143,0.0	0.542
32253	"ENSG00000124588"	"NQO2"	chr6	+	3004494	3004651	3004166	3004259	3006467	3006559	32253	15,13,9	0,2,0	11,8,3	5,6,5	298	149	3.71503e-07	0.000231075	1.0,0.765,1.0	0.524,0.4,0.231	0.537
50805	"ENSG00000130540"	"SULT4A1"	chr22	-	43827513	43827640	43824509	43826113	43829059	43829198	50805	2,6,1	0,0,0	7,2,2	3,1,2	276	149	4.83775e-06	0.00135238	1.0,1.0,1.0	0.557,0.519,0.351	0.524
55095	"ENSG00000213689"	"TREX1"	chr3	+	48466629	48466641	48466250	48466309	48466739	48467645	55095	1,2,1	1,0,1	3,0,0	4,1,1	161	149	0.000244043	0.0185364	0.481,1.0,0.481	0.41,0.0,0.0	0.517
18721	"ENSG00000255561"	"FDXACB1"	chr11	-	111878555	111878712	111876807	111877011	111878960	111879165	18721	16,9,25	0,0,1	1,7,2	2,0,4	298	149	7.78015e-05	0.00924881	1.0,1.0,0.926	0.2,1.0,0.2	0.509
2613	"ENSG00000011451"	"WIZ"	chr19	-	15442675	15442748	15436805	15437129	15448102	15448367	2613	3,3,3	1,0,0	1,0,1	4,1,0	222	149	2.26463e-05	0.00390519	0.668,1.0,1.0	0.144,0.0,1.0	0.508
27352	"ENSG00000069869"	"NEDD4"	chr15	-	55991925	55992005	55966472	55966546	55993510	55993602	27352	2,6,2	9,0,2	0,0,0	1,3,1	229	149	5.28309e-06	0.00143212	0.126,1.0,0.394	0.0,0.0,0.0	0.507
67620	"ENSG00000167515"	"TRAPPC2L"	chr16	+	88859344	88859443	88858618	88858789	88859572	88859750	67620	31,40,12	0,0,0	54,29,21	24,8,41	248	149	6.29274e-13	5.62917e-09	1.0,1.0,1.0	0.575,0.685,0.235	0.502
18051	"ENSG00000107902"	"LHPP"	chr10	+	124488421	124488575	124461822	124461987	124498035	124498128	18051	6,7,1	0,0,0	5,3,5	2,5,1	298	149	4.0362e-08	4.81411e-05	1.0,1.0,1.0	0.556,0.231,0.714	0.5
17947	"ENSG00000152464"	"RPP38"	chr10	+	15102217	15102336	15097179	15097409	15103304	15103713	17947	12,26,18	0,9,0	0,7,14	9,13,1	268	149	0.00224142	0.0840697	1.0,0.616,1.0	0.0,0.23,0.886	0.5
25431	"ENSG00000213420"	"GPC2"	chr7	-	100175571	100175894	100173457	100174765	100176206	100176365	25431	3,6,2	0,0,0	3,0,2	0,2,1	298	149	0.0335659	0.47908	1.0,1.0,1.0	1.0,0.0,0.5	0.5
21700	"ENSG00000176884"	"GRIN1"	chr9	+	137165185	137165296	137164171	137164215	137167773	137168755	21700	9,9,10	0,0,5	7,12,7	8,11,8	260	149	0.000288515	0.020565	1.0,1.0,0.534	0.334,0.385,0.334	0.494
43913	"ENSG00000196247"	"ZNF107"	chr7	+	64679176	64679336	64666197	64666285	64691247	64691374	43913	2,5,0	0,0,5	2,1,0	2,2,1	298	149	0.0102436	0.231107	1.0,1.0,0.0	0.333,0.2,0.0	0.489
26180	"ENSG00000177311"	"ZBTB38"	chr3	+	141438242	141438365	141403926	141404031	141442388	141442670	26180	1,1,4	0,4,1	0,0,1	1,1,1	272	149	0.00486884	0.142102	1.0,0.12,0.687	0.0,0.0,0.354	0.484
4175	"ENSG00000130856"	"ZNF236"	chr18	+	76935979	76936061	76927926	76928106	76937155	76937343	4175	0,4,4	1,1,1	0,0,0	2,1,1	231	149	1.14181e-05	0.00243206	0.0,0.721,0.721	0.0,0.0,0.0	0.481
15463	"ENSG00000029153"	"ARNTL2"	chr12	+	27387227	27387320	27385480	27385560	27389178	27389296	15463	4,4,1	0,0,0	10,3,1	1,4,1	242	149	8.69079e-05	0.00990017	1.0,1.0,1.0	0.86,0.316,0.381	0.481
41509	"ENSG00000188917"	"TRMT2B"	chrX	-	101042232	101042312	101041316	101041371	101051783	101052082	41509	1,3,3	0,0,0	1,1,1	0,1,3	229	149	0.00131987	0.0604704	1.0,1.0,1.0	1.0,0.394,0.178	0.476
19647	"ENSG00000174165"	"ZDHHC24"	chr11	-	66526935	66527006	66521081	66521466	66543703	66543981	19647	1,2,5	0,6,0	0,6,1	4,2,7	220	149	0.0135013	0.274732	1.0,0.184,1.0	0.0,0.67,0.088	0.475
48757	"ENSG00000076321"	"KLHL20"	chr1	+	173715522	173715654	173714940	173715078	173716002	173716066	48757	3,2,2	0,1,2	0,2,2	1,2,10	281	149	0.00662339	0.17452	1.0,0.515,0.347	0.0,0.347,0.096	0.473
31296	"ENSG00000144233"	"AMMECR1L"	chr2	-	127871248	127871359	127866899	127866996	127873827	127874272	31296	1,15,10	0,0,0	1,1,12	0,4,8	260	149	1.08856e-06	0.000480876	1.0,1.0,1.0	1.0,0.125,0.462	0.471
57397	"ENSG00000145832"	"SLC25A48"	chr5	+	135871460	135871718	135852562	135852821	135879967	135880097	57397	3,9,4	0,0,0	4,1,1	2,5,0	298	149	6.47493e-06	0.00162018	1.0,1.0,1.0	0.5,0.091,1.0	0.47
57309	"ENSG00000273345"	"AC104109"	chr5	-	134319357	134319497	134308573	134308727	134321790	134321903	57309	10,2,1	0,0,0	2,4,5	3,0,5	289	149	2.89462e-06	0.000924779	1.0,1.0,1.0	0.256,1.0,0.34	0.468
41619	"ENSG00000186301"	"MST1P2"	chr1	+	16646786	16646901	16646596	16646709	16646979	16647116	41619	1,2,3	0,8,1	1,0,2	7,2,3	264	149	0.0465559	0.588761	1.0,0.124,0.629	0.075,0.0,0.273	0.468
27684	"ENSG00000138759"	"FRAS1"	chr4	+	78286404	78286539	78284404	78284548	78308065	78308209	27684	6,13,1	0,0,0	1,4,1	5,2,0	284	149	8.50187e-06	0.00195009	1.0,1.0,1.0	0.095,0.512,1.0	0.464
46443	"ENSG00000180776"	"ZDHHC20"	chr13	-	21381900	21381945	21381433	21381549	21382919	21383009	46443	2,3,7	2,3,5	0,0,0	6,8,4	194	149	8.06695e-09	1.51922e-05	0.434,0.434,0.518	0.0,0.0,0.0	0.462
29620	"ENSG00000089682"	"RBM41"	chrX	-	107113396	107113468	107088734	107088839	107115351	107115556	29620	0,5,2	3,0,0	1,3,1	2,5,8	221	149	0.00593932	0.162539	0.0,1.0,1.0	0.252,0.288,0.078	0.461
26146	"ENSG00000114126"	"TFDP2"	chr3	-	142054114	142054149	142005440	142005544	142093060	142093127	26146	4,2,2	0,6,9	0,0,0	3,8,13	184	149	5.52197e-05	0.00726423	1.0,0.213,0.153	0.0,0.0,0.0	0.455
22685	"ENSG00000038532"	"CLEC16A"	chr16	+	11174153	11174277	11166387	11166552	11178334	11182181	22685	4,3,9	0,0,7	2,0,2	0,14,16	273	149	0.00158479	0.0685694	1.0,1.0,0.412	1.0,0.0,0.064	0.449
6312	"ENSG00000167549"	"CORO6"	chr17	-	29617499	29617619	29616937	29617042	29618789	29618971	6312	2,5,3	1,1,3	2,0,2	7,1,7	269	149	0.00168011	0.0708101	0.526,0.735,0.356	0.137,0.0,0.137	0.448
40411	"ENSG00000225077"	"LINC00337"	chr1	+	6236965	6237150	6236239	6236336	6237244	6237345	40411	7,5,12	0,3,0	1,7,0	4,0,3	298	149	0.00250382	0.0904968	1.0,0.455,1.0	0.111,1.0,0.0	0.448
14085	"ENSG00000111785"	"RIC8B"	chr12	+	106870822	106870942	106860267	106860412	106885903	106889316	14085	4,8,10	4,3,1	1,5,0	3,6,1	269	149	0.00921211	0.216008	0.356,0.596,0.847	0.156,0.316,0.0	0.442
36568	"ENSG00000224081"	"SLC44A3-AS1"	chr1	-	94732257	94732437	94705438	94705557	94819955	94820266	36568	1,9,6	0,0,0	12,3,1	2,1,1	298	149	0.0401129	0.535367	1.0,1.0,1.0	0.75,0.6,0.333	0.439
23977	"ENSG00000163291"	"PAQR3"	chr4	-	78923856	78923947	78911877	78920681	78926520	78926604	23977	1,7,2	2,0,0	2,8,2	7,3,7	240	149	0.000827062	0.0439079	0.237,1.0,1.0	0.151,0.623,0.151	0.437
7079	"ENSG00000140995"	"DEF8"	chr16	+	89949419	89949513	89948754	89948814	89954288	89954376	7079	3,6,3	0,0,3	4,1,2	2,2,3	243	149	0.00452096	0.136894	1.0,1.0,0.38	0.551,0.235,0.29	0.435
24846	"ENSG00000122644"	"ARL4A"	chr7	+	12687634	12687728	12686855	12687043	12688165	12689179	24846	12,26,8	5,5,0	7,13,0	9,3,5	243	149	0.0116182	0.249905	0.595,0.761,1.0	0.323,0.727,0.0	0.435
61518	"ENSG00000112701"	"SENP6"	chr6	+	75640686	75640704	75634706	75634811	75647730	75647801	61518	4,0,2	0,2,0	1,1,0	3,1,2	167	149	6.36064e-05	0.00801221	1.0,0.0,1.0	0.229,0.472,0.0	0.433
9009	"ENSG00000161996"	"WDR90"	chr16	+	651826	652039	651643	651747	652466	652535	9009	22,9,6	3,0,0	25,8,3	9,9,1	298	149	7.25783e-05	0.00877709	0.786,1.0,1.0	0.581,0.308,0.6	0.432
15900	"ENSG00000100099"	"HPS4"	chr22	-	26466050	26466104	26465454	26465551	26466225	26466262	15900	3,2,16	0,4,0	0,3,7	4,14,1	203	149	0.00268619	0.0952642	1.0,0.268,1.0	0.0,0.136,0.837	0.432
67559	"ENSG00000197779"	"ZNF81"	chrX	+	47842649	47842768	47836945	47837007	47846104	47846321	67559	1,3,1	0,4,0	0,4,0	4,0,9	268	149	0.0438205	0.567912	1.0,0.294,1.0	0.0,1.0,0.0	0.431
28893	"ENSG00000129810"	"SGO1"	chr3	-	20175004	20175055	20171042	20171232	20176600	20176659	28893	5,2,5	1,2,2	1,6,0	6,5,1	200	149	0.0145434	0.286802	0.788,0.427,0.651	0.11,0.472,0.0	0.428
19411	"ENSG00000158483"	"FAM86C1P"	chr11	+	71793379	71793481	71789782	71789845	71796016	71796166	19411	4,3,6	8,0,5	4,0,0	4,6,1	251	149	0.0187149	0.333827	0.229,1.0,0.416	0.372,0.0,0.0	0.424
19877	"ENSG00000110011"	"DNAJC4"	chr11	+	64232509	64232614	64231891	64231964	64233893	64233980	19877	7,7,1	0,0,0	6,5,10	3,2,4	254	149	3.49479e-07	0.000223305	1.0,1.0,1.0	0.54,0.595,0.595	0.423
42077	"ENSG00000214719"	"AC005562"	chr17	+	30631754	30631979	30610888	30610942	30633097	30633390	42077	21,23,31	1,0,0	4,8,25	5,4,2	298	149	6.71101e-07	0.000353137	0.913,1.0,1.0	0.286,0.5,0.862	0.422
16277	"ENSG00000107679"	"PLEKHA1"	chr10	+	122392302	122392372	122374695	122374806	122393180	122393341	16277	3,3,2	0,1,0	2,4,1	3,0,6	219	149	4.30965e-05	0.00609517	1.0,0.671,1.0	0.312,1.0,0.102	0.419
26838	"ENSG00000115325"	"DOK1"	chr2	+	74554793	74554859	74549070	74549172	74555153	74555387	26838	4,0,3	0,3,3	0,2,0	2,7,1	215	149	0.00377578	0.120169	1.0,0.0,0.409	0.0,0.165,0.0	0.415
814	"ENSG00000183963"	"SMTN"	chr22	+	31082915	31083002	31080675	31080754	31083178	31083309	814	18,4,5	17,32,0	13,1,0	31,27,28	236	149	0.0182061	0.3296	0.401,0.073,1.0	0.209,0.023,0.0	0.414
49945	"ENSG00000162591"	"MEGF6"	chr1	-	3496987	3497119	3496654	3496783	3497232	3497361	49945	5,3,6	6,0,5	2,1,7	18,4,9	281	149	0.0292325	0.440878	0.306,1.0,0.389	0.056,0.117,0.292	0.41
54397	"ENSG00000250222"	"AC008443"	chr5	+	181193341	181193467	181191923	181192016	181194233	181194428	54397	20,13,17	0,0,0	2,8,10	10,2,0	275	149	2.139e-05	0.00377032	1.0,1.0,1.0	0.098,0.684,1.0	0.406
47580	"ENSG00000214160"	"ALG3"	chr3	-	184243790	184243996	184242300	184242676	184245467	184245615	47580	11,7,2	0,0,0	7,3,5	0,3,3	298	149	6.84633e-05	0.00841839	1.0,1.0,1.0	1.0,0.333,0.455	0.404
47234	"ENSG00000197323"	"TRIM33"	chr1	-	114397939	114397990	114392789	114397860	114399456	114399609	47234	6,8,7	1,1,1	10,0,7	2,4,5	200	149	0.00562679	0.15644	0.817,0.856,0.839	0.788,0.0,0.511	0.404
5104	"ENSG00000184640"	"SEPTIN9"	chr17	+	77294773	77294903	77294488	77294571	77307140	77307197	5104	1,8,6	0,0,0	5,3,7	0,1,17	279	149	1.95284e-05	0.00354702	1.0,1.0,1.0	1.0,0.616,0.18	0.401
6924	"ENSG00000182557"	"SPNS3"	chr17	+	4448154	4448303	4446047	4446199	4453015	4453205	6924	4,5,9	0,0,0	9,1,6	0,2,2	298	149	0.0175863	0.322374	1.0,1.0,1.0	1.0,0.2,0.6	0.4
11756	"ENSG00000173875"	"ZNF791"	chr19	+	12612225	12612365	12610919	12611082	12623699	12623826	11756	5,3,3	8,1,2	0,1,0	2,5,5	289	149	1.35067e-05	0.0027617	0.244,0.607,0.436	0.0,0.093,0.0	0.398
29341	"ENSG00000220804"	"LINC01881"	chr2	+	242094886	242095027	242088632	242088801	242114638	242114741	29341	2,2,3	0,1,0	4,1,1	0,4,2	290	149	0.00011973	0.0118449	1.0,0.507,1.0	1.0,0.114,0.204	0.396
68875	"ENSG00000268902"	"CSAG2"	chrX	-	152709460	152709575	152708260	152708640	152713255	152713315	68875	3,3,2	1,1,0	11,1,4	10,3,2	264	149	0.000872878	0.0453314	0.629,0.629,1.0	0.383,0.158,0.53	0.396
52959	"ENSG00000146223"	"RPL7L1"	chr6	+	42880860	42881082	42879638	42879951	42883450	42883614	52959	8,5,1	0,0,0	10,5,9	5,5,0	298	149	2.18962e-06	0.000783489	1.0,1.0,1.0	0.5,0.333,1.0	0.389
12786	"ENSG00000139734"	"DIAPH3"	chr13	-	60132956	60132989	60112009	60112186	60163586	60163766	12786	5,9,0	3,0,1	0,1,1	2,6,2	182	149	9.47288e-05	0.0105198	0.577,1.0,0.0	0.0,0.12,0.29	0.389
53803	"ENSG00000150455"	"TIRAP"	chr11	+	126291424	126291569	126290802	126290961	126292476	126292687	53803	3,1,4	0,16,9	0,0,1	4,18,10	294	149	0.0047076	0.138775	1.0,0.031,0.184	0.0,0.0,0.048	0.389
33919	"ENSG00000125462"	"C1orf61"	chr1	-	156414653	156414753	156404255	156404601	156420170	156420336	33919	1,1,5	3,0,0	0,0,2	1,1,0	249	149	0.00690847	0.179	0.166,1.0,1.0	0.0,0.0,1.0	0.389
71044	"ENSG00000169398"	"PTK2"	chr8	-	140948665	140948723	140925660	140925749	141001124	141001164	71044	5,9,5	8,4,5	0,5,0	15,15,13	207	149	1.40213e-05	0.00282318	0.31,0.618,0.419	0.0,0.194,0.0	0.384
50735	"ENSG00000144821"	"MYH15"	chr3	-	108470041	108470212	108464637	108464814	108470697	108470847	50735	5,2,2	11,1,0	1,0,1	2,1,1	298	149	0.00459983	0.137733	0.185,0.5,1.0	0.2,0.0,0.333	0.384
59	"ENSG00000160201"	"U2AF1"	chr21	-	43101365	43101432	43100452	43100519	43104314	43104402	59	17,167,6	3,82,5	20,6,2	15,46,8	216	149	0.00040473	0.0261409	0.796,0.584,0.453	0.479,0.083,0.147	0.375
31433	"ENSG00000010030"	"ETV7"	chr6	-	36375829	36376035	36373452	36373578	36385533	36385669	31433	8,8,9	1,0,1	4,6,4	1,3,4	298	149	7.96868e-05	0.0093487	0.8,1.0,0.818	0.667,0.5,0.333	0.373
62963	"ENSG00000112981"	"NME5"	chr5	-	138138651	138138785	138129262	138129468	138139370	138139428	62963	36,5,7	0,0,0	14,0,4	1,3,0	283	149	0.0178749	0.325497	1.0,1.0,1.0	0.881,0.0,1.0	0.373
15544	"ENSG00000111711"	"GOLT1B"	chr12	+	21506884	21506976	21501788	21501948	21512294	21512376	15544	14,10,17	0,0,0	10,19,3	4,7,1	241	149	2.02545e-08	2.89898e-05	1.0,1.0,1.0	0.607,0.627,0.65	0.372
70433	"ENSG00000171700"	"RGS19"	chr20	-	64076856	64076954	64076524	64076646	64079872	64079988	70433	8,20,25	2,1,0	20,9,6	4,6,9	247	149	1.99731e-05	0.00359134	0.707,0.923,1.0	0.751,0.475,0.287	0.372
17627	"ENSG00000196693"	"ZNF33B"	chr10	-	42632294	42632439	42631807	42632024	42636919	42636972	17627	17,8,8	0,0,0	6,15,10	4,0,6	294	149	2.42583e-06	0.000842728	1.0,1.0,1.0	0.432,1.0,0.458	0.37
17196	"ENSG00000166348"	"USP54"	chr10	-	73504849	73504990	73500654	73500838	73505307	73505426	17196	15,9,6	0,0,0	10,5,14	0,6,5	290	149	2.65757e-06	0.000872415	1.0,1.0,1.0	1.0,0.3,0.59	0.37
56905	"ENSG00000164221"	"CCDC112"	chr5	-	115269702	115269798	115268881	115269000	115271212	115271626	56905	28,11,7	10,1,0	20,15,2	9,5,6	245	149	0.0331746	0.475582	0.63,0.87,1.0	0.575,0.646,0.169	0.37
42860	"ENSG00000145002"	"FAM86B2"	chr8	-	12430349	12430451	12428980	12429114	12432081	12432162	42860	7,20,4	6,8,0	9,0,5	4,10,6	251	149	0.0389317	0.525879	0.409,0.597,1.0	0.572,0.0,0.331	0.368
9597	"ENSG00000178761"	"FAM219B"	chr15	-	74906323	74906365	74905153	74905231	74906586	74906848	9597	14,17,10	1,5,5	11,7,3	9,7,8	191	149	0.00219089	0.0830448	0.916,0.726,0.609	0.488,0.438,0.226	0.366
2133	"ENSG00000267120"	"AD000671"	chr19	-	35745124	35745212	35744625	35744738	35745347	35745432	2133	16,8,7	0,2,0	22,8,6	5,6,5	237	149	2.84953e-05	0.00463463	1.0,0.715,1.0	0.734,0.456,0.43	0.365
63740	"ENSG00000042493"	"CAPG"	chr2	-	85413142	85413244	85402122	85402158	85413832	85413974	63740	11,7,2	1,0,0	8,5,1	4,0,2	251	149	0.00106293	0.0518877	0.867,1.0,1.0	0.543,1.0,0.229	0.365
42827	"ENSG00000130958"	"SLC35D2"	chr9	-	96343903	96343996	96324090	96324169	96364463	96364537	42827	1,5,4	0,0,1	1,4,7	2,1,2	242	149	0.00107795	0.0523356	1.0,1.0,0.711	0.235,0.711,0.683	0.361
39579	"ENSG00000132677"	"RHBG"	chr1	+	156381346	156381513	156371181	156371254	156382747	156382869	39579	4,7,18	0,0,3	0,4,1	4,1,0	298	149	0.00607102	0.164853	1.0,1.0,0.75	0.0,0.667,1.0	0.361
68255	"ENSG00000105552"	"BCAT2"	chr19	-	48807755	48808236	48806999	48807074	48810808	48810921	68255	17,9,12	1,4,0	11,9,6	9,2,8	298	149	0.00389035	0.123081	0.895,0.529,1.0	0.379,0.692,0.273	0.36
48034	"ENSG00000116191"	"RALGPS2"	chr1	+	178892229	178892307	178889641	178889696	178893918	178894024	48034	2,8,1	1,0,0	3,6,0	2,0,2	227	149	0.00660313	0.174243	0.568,1.0,1.0	0.496,1.0,0.0	0.357
45121	"ENSG00000163867"	"ZMYM6"	chr1	-	35030546	35030713	35020382	35020467	35031814	35031905	45121	13,11,4	0,0,0	4,1,3	2,0,2	298	149	0.0113049	0.245755	1.0,1.0,1.0	0.5,1.0,0.429	0.357
41421	"ENSG00000116473"	"RAP1A"	chr1	+	111627469	111627563	111619776	111619934	111691333	111691417	41421	5,5,0	0,0,5	1,2,0	1,1,1	243	149	0.0107307	0.237455	1.0,1.0,0.0	0.38,0.551,0.0	0.356
23169	"ENSG00000109686"	"SH3D19"	chr4	-	151144219	151144288	151143909	151144050	151147921	151148186	23169	4,5,10	9,0,0	1,9,7	8,4,5	218	149	0.0213583	0.363233	0.233,1.0,1.0	0.079,0.606,0.489	0.353
36781	"ENSG00000233593"	"LINC02609"	chr1	-	90831929	90832196	90789397	90789487	90851482	90851631	36781	4,9,4	1,2,2	2,7,0	1,8,2	298	149	0.0177276	0.323472	0.667,0.692,0.5	0.5,0.304,0.0	0.352
61719	"ENSG00000196792"	"STRN3"	chr14	-	30918965	30919106	30913523	30913657	30935162	30935304	61719	11,1,8	3,11,1	1,3,3	9,5,8	290	149	0.031503	0.461228	0.653,0.045,0.804	0.054,0.236,0.162	0.35
50784	"ENSG00000161791"	"FMNL3"	chr12	-	49646638	49646753	49644930	49645903	49646885	49647009	50784	9,7,12	0,1,0	5,10,4	1,3,4	264	149	7.6137e-06	0.00178061	1.0,0.798,1.0	0.738,0.653,0.361	0.349
34582	"ENSG00000143367"	"TUFT1"	chr1	+	151562090	151562165	151540308	151540426	151562584	151562686	34582	24,35,37	0,10,19	15,17,44	8,26,52	224	149	0.000875647	0.0453435	1.0,0.7,0.564	0.555,0.303,0.36	0.349
70405	"ENSG00000184661"	"CDCA2"	chr8	+	25472112	25472184	25469895	25469980	25479912	25480124	70405	2,0,4	8,18,0	1,2,0	19,20,14	221	149	0.0410219	0.543849	0.144,0.0,1.0	0.034,0.063,0.0	0.349
48856	"ENSG00000140939"	"NOL3"	chr16	+	67171151	67171457	67170539	67170574	67174161	67174464	48856	1,0,6	12,7,0	0,0,0	1,1,8	298	149	0.0442516	0.571045	0.04,0.0,1.0	0.0,0.0,0.0	0.347
5760	"ENSG00000263766"	"AC025682"	chr17	-	47626546	47626627	47621841	47622087	47636511	47636601	5760	10,0,3	0,1,0	2,1,2	3,6,1	230	149	0.00010228	0.0108598	1.0,0.0,1.0	0.302,0.097,0.564	0.346
64520	"ENSG00000008710"	"PKD1"	chr16	-	2093810	2094013	2093543	2093738	2094091	2094146	64520	21,38,22	1,1,0	13,9,20	6,5,2	298	149	1.71145e-06	0.000695899	0.913,0.95,1.0	0.52,0.474,0.833	0.345
38649	"ENSG00000169403"	"PTAFR"	chr1	-	28176591	28176673	28147165	28151059	28193721	28193936	38649	6,4,4	0,6,13	3,2,0	4,10,7	231	149	0.0233066	0.382625	1.0,0.301,0.166	0.326,0.114,0.0	0.342
11940	"ENSG00000100968"	"NFATC4"	chr14	+	24368311	24368440	24367363	24367653	24369498	24369828	11940	1,7,3	3,4,0	3,0,0	1,2,1	278	149	0.0176366	0.322706	0.152,0.484,1.0	0.617,0.0,0.0	0.34
56159	"ENSG00000112367"	"FIG4"	chr6	+	109741443	109741544	109735149	109735298	109743109	109743272	56159	18,8,17	0,0,0	5,7,12	1,5,2	250	149	7.88828e-07	0.00039464	1.0,1.0,1.0	0.749,0.455,0.781	0.338
22869	"ENSG00000165238"	"WNK2"	chr9	+	93300050	93300149	93299069	93299261	93308327	93308584	22869	0,1,4	2,0,0	3,2,3	3,7,2	248	149	0.0187734	0.334365	0.0,1.0,1.0	0.375,0.147,0.474	0.335
23281	"ENSG00000135636"	"DYSF"	chr2	+	71620546	71620609	71613333	71613410	71643964	71644033	23281	1,2,1	0,1,0	2,3,2	1,1,3	212	149	0.000368697	0.0243408	1.0,0.584,1.0	0.584,0.678,0.319	0.334
1708	"ENSG00000267757"	"EML2-AS1"	chr19	+	45641878	45642072	45641690	45641766	45642224	45642840	1708	20,5,10	4,1,0	17,7,4	10,4,2	298	149	0.00349051	0.114062	0.714,0.714,1.0	0.459,0.467,0.5	0.334
69127	"ENSG00000175061"	"SNHG29"	chr17	+	16439659	16439703	16439044	16439414	16440110	16440253	69127	3,2,3	0,2,0	1,0,1	1,4,0	193	149	0.000174128	0.0149059	1.0,0.436,1.0	0.436,0.0,1.0	0.333
8865	"ENSG00000205913"	"SRRM2-AS1"	chr16	-	2749544	2749659	2743551	2743719	2752441	2752600	8865	0,2,2	1,0,0	0,0,4	2,1,0	264	149	0.000256961	0.019127	0.0,1.0,1.0	0.0,0.0,1.0	0.333
45639	"ENSG00000170949"	"ZNF160"	chr19	-	53091412	53091529	53084953	53086321	53091636	53091720	45639	0,1,3	1,0,0	0,0,3	2,1,0	266	149	0.000537066	0.0323524	0.0,1.0,1.0	0.0,0.0,1.0	0.333
1940	"ENSG00000105204"	"DYRK1B"	chr19	-	39826951	39826987	39826671	39826867	39827284	39827425	1940	0,4,3	6,0,0	2,0,0	0,3,1	185	149	0.00294535	0.101728	0.0,1.0,1.0	1.0,0.0,0.0	0.333
2963	"ENSG00000167785"	"ZNF558"	chr19	-	8830769	8830891	8825001	8825108	8831317	8831401	2963	0,4,1	2,0,0	1,0,0	0,2,1	271	149	0.00383252	0.121511	0.0,1.0,1.0	1.0,0.0,0.0	0.333
52819	"ENSG00000272762"	"AC115284"	chr3	-	51971459	51971698	51961940	51962088	51973964	51974031	52819	32,25,16	0,0,0	49,20,0	0,0,11	298	149	0.00747971	0.188213	1.0,1.0,1.0	1.0,1.0,0.0	0.333
28363	"ENSG00000163818"	"LZTFL1"	chr3	-	45837926	45838047	45835589	45835784	45841988	45842116	28363	5,5,3	0,0,0	0,9,3	11,0,0	270	149	0.00794749	0.195852	1.0,1.0,1.0	0.0,1.0,1.0	0.333
55610	"ENSG00000074964"	"ARHGEF10L"	chr1	+	17634547	17634562	17632320	17632466	17634834	17635016	55610	15,0,0	0,3,10	0,0,0	2,7,8	164	149	0.011505	0.248856	1.0,0.0,0.0	0.0,0.0,0.0	0.333
18001	"ENSG00000185480"	"PARPBP"	chr12	+	102175482	102175666	102165728	102165883	102195950	102196429	18001	5,2,4	0,0,0	0,4,1	7,0,0	298	149	0.0129062	0.266787	1.0,1.0,1.0	0.0,1.0,1.0	0.333
10324	"ENSG00000137812"	"KNL1"	chr15	+	40645655	40645772	40644996	40645087	40646986	40647038	10324	8,3,7	0,0,0	6,0,2	0,4,0	266	149	0.032672	0.472014	1.0,1.0,1.0	1.0,0.0,1.0	0.333
48709	"ENSG00000227403"	"LINC01806"	chr2	+	161245423	161245467	161244729	161244895	161246874	161249049	48709	1,2,11	0,0,0	0,4,11	4,0,0	193	149	0.0450043	0.577602	1.0,1.0,1.0	0.0,1.0,1.0	0.333
17217	"ENSG00000107758"	"PPP3CB"	chr10	-	73439871	73439901	73436432	73438420	73444724	73444822	17217	2,16,5	11,10,3	2,8,0	20,23,8	179	149	0.00760132	0.190469	0.131,0.571,0.581	0.077,0.225,0.0	0.327
41284	"ENSG00000160191"	"PDE9A"	chr21	+	42731769	42731949	42698967	42699011	42732069	42732124	41284	24,53,49	14,16,0	54,37,27	29,38,31	298	149	0.0023203	0.0861243	0.462,0.624,1.0	0.482,0.327,0.303	0.325
69150	"ENSG00000173295"	"FAM86B3P"	chr8	+	8234482	8234584	8232793	8232874	8235815	8235947	69150	6,0,6	0,1,0	2,0,5	3,5,1	251	149	0.000230241	0.0180273	1.0,0.0,1.0	0.284,0.0,0.748	0.323
1836	"ENSG00000213904"	"LIPE-AS1"	chr19	+	42521991	42522098	42485095	42485223	42525617	42525869	1836	2,5,7	0,2,0	3,3,1	0,2,3	256	149	0.00182432	0.0745157	1.0,0.593,1.0	1.0,0.466,0.162	0.322
18908	"ENSG00000087053"	"MTMR2"	chr11	-	95914241	95914312	95888155	95888261	95923874	95924000	18908	2,0,12	11,1,0	1,0,0	4,5,1	220	149	0.00246764	0.0896417	0.11,0.0,1.0	0.145,0.0,0.0	0.322
22159	"ENSG00000115257"	"PCSK4"	chr19	-	1484026	1484127	1483497	1483941	1486852	1486973	22159	1,3,2	0,0,0	3,8,9	4,0,2	250	149	0.000521057	0.0316545	1.0,1.0,1.0	0.309,1.0,0.728	0.321
49562	"ENSG00000198945"	"L3MBTL3"	chr6	+	130049755	130049830	130049281	130049393	130051248	130051408	49562	8,7,6	0,1,0	11,10,7	8,5,1	224	149	6.06391e-06	0.001561	1.0,0.823,1.0	0.478,0.571,0.823	0.317
40834	"ENSG00000163932"	"PRKCD"	chr3	+	53173492	53173608	53161355	53161428	53178403	53178537	40834	20,26,11	4,16,0	27,12,18	17,8,20	265	149	0.0184746	0.331577	0.738,0.477,1.0	0.472,0.458,0.336	0.316
18918	"ENSG00000166037"	"CEP57"	chr11	+	95822498	95822576	95821870	95821978	95827785	95828027	18918	11,3,2	0,0,0	3,6,1	2,3,0	227	149	0.00177833	0.073309	1.0,1.0,1.0	0.496,0.568,1.0	0.312
40243	"ENSG00000137955"	"RABGGTB"	chr1	+	75786699	75786797	75786227	75786274	75787496	75787604	40243	1,7,1	10,0,0	4,0,2	16,3,0	247	149	0.0326035	0.471742	0.057,1.0,1.0	0.131,0.0,1.0	0.309
41069	"ENSG00000152952"	"PLOD2"	chr3	-	146077861	146077924	146076781	146076895	146079115	146079257	41069	9,5,6	2,4,1	19,6,2	10,9,5	212	149	0.0465832	0.588781	0.76,0.468,0.808	0.572,0.319,0.219	0.309
34654	"ENSG00000163462"	"TRIM46"	chr1	+	155178808	155178846	155178491	155178613	155179631	155179934	34654	2,2,2	7,2,4	0,0,0	8,1,1	187	149	0.000587831	0.0344816	0.185,0.443,0.285	0.0,0.0,0.0	0.304
45992	"ENSG00000213079"	"SCAF8"	chr6	+	154787860	154788022	154778000	154778045	154792822	154792858	45992	12,8,13	0,0,0	10,12,2	0,4,1	298	149	0.00890103	0.211138	1.0,1.0,1.0	1.0,0.6,0.5	0.3
5179	"ENSG00000197857"	"ZNF44"	chr19	-	12293231	12293375	12275955	12276082	12294691	12294794	5179	2,1,1	1,0,0	0,3,1	2,1,0	293	149	0.0150717	0.29239	0.504,1.0,1.0	0.0,0.604,1.0	0.3
5010	"ENSG00000267787"	"AC027097"	chr18	+	57735150	57735592	57641558	57642052	57737761	57738044	5010	8,11,21	0,0,0	18,11,16	5,1,5	298	149	1.1482e-07	0.000105346	1.0,1.0,1.0	0.643,0.846,0.615	0.299
56812	"ENSG00000100299"	"ARSA"	chr22	-	50627555	50627792	50627165	50627406	50627945	50628170	56812	8,14,34	4,2,1	9,9,6	7,9,2	298	149	0.00320978	0.107622	0.5,0.778,0.944	0.391,0.333,0.6	0.299
8993	"ENSG00000162004"	"CCDC78"	chr16	-	725412	725591	724983	725293	725793	725855	8993	12,5,3	7,1,5	3,0,2	7,3,2	298	149	0.0171856	0.317631	0.462,0.714,0.231	0.176,0.0,0.333	0.299
17474	"ENSG00000178440"	"TIMM23B-AGAP6"	chr10	+	49945031	49945090	49942055	49942300	49952125	49952219	17474	2,9,7	0,0,1	3,3,4	1,2,1	208	149	0.0184451	0.331493	1.0,1.0,0.834	0.682,0.518,0.741	0.298
59630	"ENSG00000112186"	"CAP2"	chr6	+	17539268	17539458	17513848	17513954	17540972	17541148	59630	1,2,2	0,0,0	7,10,1	0,0,4	298	149	0.0409343	0.543088	1.0,1.0,1.0	1.0,1.0,0.111	0.296
5460	"ENSG00000159640"	"ACE"	chr17	+	63483028	63483173	63482465	63482689	63483459	63483558	5460	1,12,19	0,0,0	1,5,2	4,0,0	294	149	0.0414609	0.547841	1.0,1.0,1.0	0.112,1.0,1.0	0.296
3213	"ENSG00000185761"	"ADAMTSL5"	chr19	-	1511624	1511772	1510844	1510917	1512962	1513019	3213	12,12,16	0,0,0	16,6,14	5,3,0	297	149	1.51837e-05	0.00298615	1.0,1.0,1.0	0.616,0.501,1.0	0.294
33607	"ENSG00000125354"	"SEPTIN6"	chrX	-	119625334	119625396	119619308	119620051	119629317	119629508	33607	7,15,8	0,3,0	11,8,9	5,5,2	211	149	0.00107438	0.0522331	1.0,0.779,1.0	0.608,0.53,0.761	0.293
7628	"ENSG00000132600"	"PRMT7"	chr16	+	68348341	68348431	68346144	68346280	68352247	68352409	7628	39,44,44	8,4,14	47,37,45	26,40,26	239	149	4.80091e-05	0.00660717	0.752,0.873,0.662	0.53,0.366,0.519	0.291
13706	"ENSG00000176383"	"B3GNT4"	chr12	+	122204521	122204684	122203708	122203801	122206729	122207062	13706	10,5,17	0,0,0	7,9,6	0,4,2	298	149	0.000274552	0.0199044	1.0,1.0,1.0	1.0,0.529,0.6	0.29
10777	"ENSG00000196663"	"TECPR2"	chr14	+	102431795	102432128	102428249	102428382	102434234	102435211	10777	11,19,21	0,2,0	9,2,27	2,2,1	298	149	0.0127219	0.264968	1.0,0.826,1.0	0.692,0.333,0.931	0.29
45347	"ENSG00000233621"	"LINC01137"	chr1	-	37456366	37456459	37454878	37455912	37474143	37474411	45347	2,9,27	0,0,0	9,18,17	1,6,6	242	149	6.74427e-08	7.31283e-05	1.0,1.0,1.0	0.847,0.649,0.636	0.289
22688	"ENSG00000136932"	"TRMO"	chr9	-	97912872	97912975	97910282	97910616	97913400	97913558	22688	17,1,3	5,4,24	0,0,0	16,4,17	252	149	7.8857e-06	0.00182043	0.668,0.129,0.069	0.0,0.0,0.0	0.289
55995	"ENSG00000145736"	"GTF2H2"	chr5	-	71060119	71060170	71059689	71059744	71060843	71060930	55995	29,39,35	3,0,5	8,19,19	7,9,4	200	149	0.000204963	0.0164809	0.878,1.0,0.839	0.46,0.611,0.78	0.289
25276	"ENSG00000134470"	"IL15RA"	chr10	-	5963742	5963841	5960366	5960567	5966144	5966339	25276	20,46,71	0,15,25	38,21,39	14,35,21	248	149	0.0163546	0.307224	1.0,0.648,0.63	0.62,0.265,0.527	0.289
71769	"ENSG00000276291"	"FRG1HP"	chr9	+	40993252	40993434	40992248	40992479	40994632	40994699	71769	12,7,8	0,0,1	5,3,3	0,3,1	298	149	0.0219203	0.368759	1.0,1.0,0.8	1.0,0.333,0.6	0.289
71427	"ENSG00000148737"	"TCF7L2"	chr10	+	113160618	113160691	113158020	113158069	113165554	113165972	71427	63,32,40	11,1,0	60,31,26	18,15,11	222	149	1.14187e-05	0.00243206	0.794,0.956,1.0	0.691,0.581,0.613	0.288
68890	"ENSG00000197444"	"OGDHL"	chr10	-	49740709	49740837	49738190	49738262	49742827	49742978	68890	35,26,26	1,1,1	36,24,10	12,8,2	277	149	7.16214e-07	0.000367183	0.95,0.933,0.933	0.617,0.617,0.729	0.284
48919	"ENSG00000134369"	"NAV1"	chr1	+	201788467	201788638	201786428	201786577	201789739	201789792	48919	11,31,20	0,0,2	18,21,24	3,8,6	298	149	4.13477e-06	0.00118973	1.0,1.0,0.833	0.75,0.568,0.667	0.283
66019	"ENSG00000173801"	"JUP"	chr17	-	41772817	41772926	41771416	41771859	41785902	41786209	66019	3,3,4	0,0,0	13,3,5	7,1,0	258	149	3.68682e-05	0.00551974	1.0,1.0,1.0	0.517,0.634,1.0	0.283
45942	"ENSG00000186007"	"LEMD1"	chr1	-	205419229	205419352	205416231	205416296	205420454	205420574	45942	1,5,4	0,0,0	5,10,4	0,1,5	272	149	0.00198583	0.0782527	1.0,1.0,1.0	1.0,0.846,0.305	0.283
54276	"ENSG00000109572"	"CLCN3"	chr4	+	169717791	169717867	169713078	169713295	169719906	169720545	54276	0,10,3	10,9,1	2,2,0	19,6,7	225	149	0.0203367	0.352637	0.0,0.424,0.665	0.065,0.181,0.0	0.281
59689	"ENSG00000167889"	"MGAT5B"	chr17	+	76932644	76932775	76926596	76926730	76937987	76938143	59689	6,18,16	1,1,2	11,10,3	3,3,3	280	149	0.0128608	0.26662	0.761,0.905,0.81	0.661,0.639,0.347	0.276
40165	"ENSG00000104320"	"NBN"	chr8	-	89981952	89982002	89981374	89981523	89982721	89982855	40165	5,1,1	4,0,1	1,0,1	8,17,0	199	149	0.00452686	0.136894	0.483,1.0,0.428	0.086,0.0,1.0	0.275
19224	"ENSG00000149273"	"RPS3"	chr11	+	75402351	75402446	75399517	75399577	75404671	75404730	19224	7,15,8	0,6,0	9,8,4	4,5,1	244	149	0.0477184	0.596701	1.0,0.604,1.0	0.579,0.494,0.71	0.274
42886	"ENSG00000154134"	"ROBO3"	chr11	+	124877936	124878131	124877518	124877752	124878297	124878436	42886	2,14,9	10,9,7	1,2,0	14,14,12	298	149	1.86189e-06	0.000703809	0.091,0.437,0.391	0.034,0.067,0.0	0.273
17966	"ENSG00000123240"	"OPTN"	chr10	+	13108961	13109015	13108137	13108289	13109111	13109288	17966	6,3,19	12,3,7	1,2,8	11,10,11	203	149	0.0145958	0.286802	0.268,0.423,0.666	0.063,0.128,0.348	0.273
64884	"ENSG00000125629"	"INSIG2"	chr2	+	118096418	118096800	118088470	118088541	118103196	118103321	64884	15,17,6	0,0,0	8,13,8	0,3,4	298	149	4.04109e-05	0.00587124	1.0,1.0,1.0	1.0,0.684,0.5	0.272
64919	"ENSG00000263001"	"GTF2I"	chr7	+	74718878	74718941	74716611	74716950	74728785	74728896	64919	56,72,46	39,12,0	43,44,39	34,24,32	212	149	0.00178422	0.0734672	0.502,0.808,1.0	0.471,0.563,0.461	0.272
3056	"ENSG00000087903"	"RFX2"	chr19	-	6026162	6026237	6016089	6016271	6110392	6110482	3056	5,4,6	0,0,0	8,12,7	4,5,0	224	149	5.50943e-06	0.00147118	1.0,1.0,1.0	0.571,0.615,1.0	0.271
1776	"ENSG00000073008"	"PVR"	chr19	+	44658741	44658765	44653899	44654017	44661291	44661323	1776	8,14,3	1,2,1	2,8,11	5,2,6	173	149	0.0100571	0.228195	0.873,0.858,0.721	0.256,0.775,0.612	0.27
54304	"ENSG00000233695"	"GAS6-AS1"	chr13	+	113833491	113833579	113815629	113815691	113838076	113838247	54304	22,21,25	10,5,9	6,12,4	11,10,3	237	149	0.004866	0.142102	0.58,0.725,0.636	0.255,0.43,0.456	0.267
47084	"ENSG00000153207"	"AHCTF1"	chr1	-	246842693	246842776	246839097	246840998	246849614	246849849	47084	25,18,10	0,0,0	11,15,10	2,1,6	232	149	2.77513e-06	0.000894594	1.0,1.0,1.0	0.779,0.906,0.517	0.266
31094	"ENSG00000258728"	"AL162231"	chr9	+	34655604	34655665	34655217	34655317	34657034	34657113	31094	6,9,17	0,0,1	5,6,10	3,3,0	210	149	0.000837282	0.0441882	1.0,1.0,0.923	0.542,0.587,1.0	0.265
34493	"ENSG00000062524"	"LTK"	chr15	-	41512976	41513120	41509030	41509129	41513666	41513827	34493	11,13,29	0,0,2	10,12,14	4,2,2	293	149	0.00026643	0.019616	1.0,1.0,0.881	0.56,0.753,0.781	0.262
4290	"ENSG00000141644"	"MBD1"	chr18	-	50271468	50271540	50268840	50269818	50272676	50272738	4290	21,43,23	0,8,2	24,35,34	7,14,18	221	149	0.000313406	0.0217753	1.0,0.784,0.886	0.698,0.628,0.56	0.261
34103	"ENSG00000177479"	"ARIH2"	chr3	+	48924717	48924971	48922747	48922811	48927461	48927813	34103	9,12,14	3,10,39	5,7,6	18,28,23	298	149	0.0069958	0.17983	0.6,0.375,0.152	0.122,0.111,0.115	0.26
33430	"ENSG00000112357"	"PEX7"	chr6	+	136866626	136866733	136826318	136826469	136869889	136870003	33430	13,12,4	1,0,0	15,1,10	0,5,0	256	149	0.0322522	0.468174	0.883,1.0,1.0	1.0,0.104,1.0	0.26
66470	"ENSG00000157800"	"SLC37A3"	chr7	-	140355667	140355764	140352061	140352146	140364407	140364491	66470	5,7,11	0,0,0	4,6,9	0,2,4	246	149	0.00035301	0.023491	1.0,1.0,1.0	1.0,0.645,0.577	0.259
6627	"ENSG00000006740"	"ARHGAP44"	chr17	+	12974088	12974310	12958716	12958897	12980057	12980233	6627	6,14,9	0,0,0	3,4,10	0,1,4	298	149	0.00382182	0.121342	1.0,1.0,1.0	1.0,0.667,0.556	0.259
57660	"ENSG00000183530"	"PRR14L"	chr22	-	31738386	31738911	31725537	31725610	31749992	31750132	57660	13,5,1	2,0,0	5,4,3	1,0,4	298	149	0.00408333	0.12737	0.765,1.0,1.0	0.714,1.0,0.273	0.259
69026	"ENSG00000180008"	"SOCS4"	chr14	+	55031862	55031991	55027235	55027471	55042951	55049489	69026	4,8,2	4,0,0	1,5,0	0,2,3	278	149	0.0359009	0.49907	0.349,1.0,1.0	1.0,0.573,0.0	0.259
16238	"ENSG00000175029"	"CTBP2"	chr10	-	125133511	125133612	125003337	125003492	125160318	125160499	16238	1,4,8	2,2,4	0,2,0	4,1,4	250	149	0.000413841	0.0264429	0.23,0.544,0.544	0.0,0.544,0.0	0.258
19150	"ENSG00000137492"	"THAP12"	chr11	-	76364337	76364432	76360955	76361063	76365851	76365972	19150	0,5,6	6,3,2	2,0,0	2,4,8	244	149	0.00130297	0.0599268	0.0,0.504,0.647	0.379,0.0,0.0	0.257
56275	"ENSG00000112983"	"BRD8"	chr5	-	138166517	138166610	138165827	138166108	138167933	138168078	56275	17,13,11	6,9,7	5,8,8	8,13,13	242	149	0.0037108	0.118553	0.636,0.471,0.492	0.278,0.275,0.275	0.257
63111	"ENSG00000023909"	"GCLM"	chr1	-	93904522	93904588	93901584	93901669	93909037	93909430	63111	10,7,22	0,0,2	3,18,13	5,0,2	215	149	0.00457418	0.137425	1.0,1.0,0.884	0.294,1.0,0.818	0.257
59393	"ENSG00000182612"	"TSPAN10"	chr17	+	81642306	81642448	81637197	81637406	81644991	81645629	59393	3,2,9	0,3,0	2,1,1	0,3,1	291	149	0.0327664	0.472762	1.0,0.254,1.0	1.0,0.146,0.339	0.256
35107	"ENSG00000100523"	"DDHD1"	chr14	-	53093315	53093444	53091784	53091932	53103682	53103856	35107	5,9,15	0,0,3	5,8,3	0,4,2	278	149	0.0162439	0.306111	1.0,1.0,0.728	1.0,0.517,0.446	0.255
34707	"ENSG00000108021"	"TASOR2"	chr10	+	5735303	5735546	5730486	5731203	5739617	5740497	34707	10,8,16	0,0,0	18,8,12	0,3,3	298	149	0.000785217	0.0422506	1.0,1.0,1.0	1.0,0.571,0.667	0.254
50244	"ENSG00000132952"	"USPL1"	chr13	+	30621072	30621239	30617919	30618056	30621763	30621892	50244	6,7,0	1,1,1	2,3,0	5,1,2	298	149	0.0406833	0.541043	0.75,0.778,0.0	0.167,0.6,0.0	0.254
45138	"ENSG00000048405"	"ZNF800"	chr7	-	127386059	127386155	127377185	127377329	127391496	127391615	45138	3,1,12	0,0,0	8,7,5	0,1,4	245	149	0.00795339	0.195863	1.0,1.0,1.0	1.0,0.81,0.432	0.253
5757	"ENSG00000159111"	"MRPL10"	chr17	-	47829138	47829236	47828500	47828670	47831310	47831523	5757	10,5,0	2,0,1	0,4,0	8,0,2	247	149	0.00278348	0.0978488	0.751,1.0,0.0	0.0,1.0,0.0	0.25
21838	"ENSG00000111752"	"PHC1"	chr12	+	8933306	8933350	8932562	8932813	8933864	8933980	21838	3,7,9	0,1,0	4,3,5	0,2,3	193	149	0.004039	0.126332	1.0,0.844,1.0	1.0,0.537,0.563	0.248
7941	"ENSG00000090372"	"STRN4"	chr19	-	46727451	46727691	46725472	46725632	46727893	46727959	7941	1,3,4	0,0,0	1,8,5	0,0,7	298	149	0.0117719	0.252379	1.0,1.0,1.0	1.0,1.0,0.263	0.246
23448	"ENSG00000275111"	"ZNF2"	chr2	+	95177482	95177609	95165431	95165860	95180158	95180272	23448	3,13,5	0,0,0	4,4,3	6,0,0	276	149	0.0176058	0.322566	1.0,1.0,1.0	0.265,1.0,1.0	0.245
2130	"ENSG00000161265"	"U2AF1L4"	chr19	-	35745124	35745187	35744322	35744738	35745347	35745398	2130	14,5,4	0,2,0	27,12,8	5,6,5	212	149	0.00044867	0.0279692	1.0,0.637,1.0	0.791,0.584,0.529	0.244
30189	"ENSG00000115568"	"ZNF142"	chr2	-	218658700	218658876	218656149	218656463	218658979	218659035	30189	24,24,28	2,1,0	21,25,13	8,0,7	298	149	0.000779762	0.0420811	0.857,0.923,1.0	0.568,1.0,0.481	0.244
19353	"ENSG00000186642"	"PDE2A"	chr11	-	72631077	72631139	72608661	72608751	72642253	72642326	19353	2,2,14	0,0,0	14,6,8	2,3,1	211	149	0.000823753	0.0438624	1.0,1.0,1.0	0.832,0.585,0.85	0.244
50851	"ENSG00000163684"	"RPP14"	chr3	+	58310308	58310406	58306246	58306417	58310506	58310591	50851	44,36,34	1,2,10	37,23,20	10,6,16	247	149	0.00301568	0.103458	0.964,0.916,0.672	0.691,0.698,0.43	0.244
70057	"ENSG00000040341"	"STAU2"	chr8	-	73527690	73527804	73422613	73422702	73552011	73552319	70057	8,4,13	1,8,19	4,2,0	2,19,22	263	149	0.00682682	0.178045	0.819,0.221,0.279	0.531,0.056,0.0	0.244
57008	"ENSG00000049618"	"ARID1B"	chr6	+	157150724	157150853	157148623	157148951	157167039	157167185	57008	1,0,4	2,5,2	0,0,0	2,7,4	278	149	0.0256423	0.407384	0.211,0.0,0.517	0.0,0.0,0.0	0.243
52560	"ENSG00000125351"	"UPF3B"	chrX	-	119840645	119840684	119838366	119838527	119841075	119841258	52560	2,0,3	4,4,3	0,0,0	2,4,1	188	149	0.0106074	0.235456	0.284,0.0,0.442	0.0,0.0,0.0	0.242
40124	"ENSG00000132849"	"PATJ"	chr1	+	62100318	62100408	62084514	62084648	62108436	62108520	40124	1,1,5	16,12,1	1,0,1	9,10,11	239	149	0.0149541	0.291125	0.038,0.049,0.757	0.065,0.0,0.054	0.242
68192	"ENSG00000168591"	"TMUB2"	chr17	+	44187675	44187743	44187233	44187431	44189021	44189588	68192	4,20,10	5,3,0	14,10,16	9,7,14	217	149	0.038504	0.523263	0.355,0.821,1.0	0.516,0.495,0.44	0.242
49257	"ENSG00000064012"	"CASP8"	chr2	+	201272897	201272942	201272637	201272776	201274888	201274953	49257	16,22,31	4,5,8	10,16,19	6,17,11	194	149	0.00172291	0.0716851	0.754,0.772,0.749	0.561,0.42,0.57	0.241
59517	"ENSG00000174373"	"RALGAPA1"	chr14	-	35548507	35548538	35538351	35539690	35549109	35549234	59517	3,5,5	5,4,19	1,2,0	5,9,4	180	149	0.00547079	0.153775	0.332,0.509,0.179	0.142,0.155,0.0	0.241
60138	"ENSG00000137404"	"NRM"	chr6	-	30690046	30690243	30688046	30688942	30690841	30690976	60138	103,67,27	11,7,5	168,33,9	28,12,9	298	149	0.00888895	0.211138	0.824,0.827,0.73	0.75,0.579,0.333	0.24
68730	"ENSG00000101974"	"ATP11C"	chrX	-	139731650	139731755	139726348	139728962	139737915	139738069	68730	7,4,0	0,0,1	0,10,2	2,2,1	254	149	0.0020025	0.0784813	1.0,1.0,0.0	0.0,0.746,0.54	0.238
12056	"ENSG00000259431"	"THTPA"	chr14	+	23556742	23557034	23556270	23556343	23558694	23558898	12056	3,5,3	0,1,1	6,0,2	2,2,0	298	149	0.00955725	0.221632	1.0,0.714,0.6	0.6,0.0,1.0	0.238
16170	"ENSG00000151640"	"DPYSL4"	chr10	+	132202645	132202825	132201945	132202116	132203761	132203927	16170	76,48,38	1,0,0	90,51,38	18,3,10	298	149	1.66691e-09	4.26038e-06	0.974,1.0,1.0	0.714,0.895,0.655	0.237
5383	"ENSG00000101363"	"MANBAL"	chr20	+	37297295	37297534	37289662	37289686	37298762	37298879	5383	50,69,84	1,2,3	57,64,49	11,11,12	298	149	1.07754e-07	0.000104207	0.962,0.945,0.933	0.722,0.744,0.671	0.234
45505	"ENSG00000163898"	"LIPH"	chr3	-	185524070	185524160	185519141	185519309	185527483	185527585	45505	6,19,45	0,0,1	7,17,18	2,2,4	239	149	4.47358e-05	0.00622854	1.0,1.0,0.966	0.686,0.841,0.737	0.234
48325	"ENSG00000163608"	"NEPRO"	chr3	-	113017447	113017602	113013948	113014032	113019541	113019644	48325	27,19,15	4,0,0	11,22,10	5,2,2	298	149	0.0154832	0.296585	0.771,1.0,1.0	0.524,0.846,0.714	0.229
8283	"ENSG00000122257"	"RBBP6"	chr16	+	24567791	24567893	24567142	24567505	24568744	24570113	8283	2,1,4	7,1,1	1,1,0	1,3,2	251	149	0.00606537	0.164853	0.145,0.372,0.704	0.372,0.165,0.0	0.228
4659	"ENSG00000104863"	"LIN7B"	chr19	+	49116262	49116472	49115225	49115331	49117854	49118015	4659	27,23,38	0,1,0	33,33,28	5,9,3	298	149	3.33948e-07	0.000219447	1.0,0.92,1.0	0.767,0.647,0.824	0.227
35752	"ENSG00000184014"	"DENND5A"	chr11	-	9143402	9143485	9141939	9142108	9144096	9144278	35752	10,17,7	0,0,1	7,17,16	1,6,5	232	149	8.6724e-06	0.00196402	1.0,1.0,0.818	0.818,0.645,0.673	0.227
46003	"ENSG00000284770"	"TBCE"	chr1	+	235427139	235427239	235414432	235414618	235430704	235430780	46003	7,5,15	0,0,0	5,18,14	2,4,0	249	149	0.00206756	0.0798937	1.0,1.0,1.0	0.599,0.729,1.0	0.224
11332	"ENSG00000119596"	"YLPM1"	chr14	+	74797579	74799697	74781333	74782325	74802555	74802676	11332	36,27,20	1,2,0	8,14,11	3,0,4	298	149	0.00414131	0.128409	0.947,0.871,1.0	0.571,1.0,0.579	0.223
61773	"ENSG00000135341"	"MAP3K7"	chr6	-	90544551	90544632	90536336	90536401	90547257	90547387	61773	7,16,12	8,8,11	1,13,5	10,16,9	230	149	0.0281249	0.431546	0.362,0.564,0.414	0.061,0.345,0.265	0.223
49930	"ENSG00000101493"	"ZNF516"	chr18	-	76370527	76370595	76357681	76362557	76371466	76371571	49930	17,41,46	3,0,0	8,20,14	10,4,0	217	149	0.00053004	0.032037	0.796,1.0,1.0	0.355,0.774,1.0	0.222
44376	"ENSG00000137074"	"APTX"	chr9	-	32988082	32988124	32987543	32987731	32989758	32989895	44376	22,48,38	6,5,11	16,28,23	16,13,11	191	149	0.00206224	0.0798605	0.741,0.882,0.729	0.438,0.627,0.62	0.222
38531	"ENSG00000085760"	"MTIF2"	chr2	-	55266380	55266518	55263640	55263865	55267568	55267635	38531	7,2,7	18,21,4	1,0,0	18,32,6	287	149	5.06159e-06	0.00139318	0.168,0.047,0.476	0.028,0.0,0.0	0.221
58019	"ENSG00000143643"	"TTC13"	chr1	-	230945388	230945454	230940439	230940556	230954332	230954403	58019	3,3,2	0,1,1	1,3,1	3,3,0	215	149	0.00106244	0.0518877	1.0,0.675,0.581	0.188,0.409,1.0	0.22
15948	"ENSG00000121281"	"ADCY7"	chr16	+	50287911	50288350	50266550	50266680	50292675	50292825	15948	23,7,8	0,0,3	19,7,2	0,5,1	298	149	0.0498912	0.613895	1.0,1.0,0.571	1.0,0.412,0.5	0.22
43091	"ENSG00000163138"	"PACRGL"	chr4	+	20724807	20724888	20713431	20713539	20727284	20727397	43091	2,2,5	3,5,8	0,1,0	10,4,8	230	149	4.34964e-05	0.00612751	0.302,0.206,0.288	0.0,0.139,0.0	0.219
24898	"ENSG00000007062"	"PROM1"	chr4	-	15979394	15979463	15971042	15971082	15979880	15979904	24898	7,6,3	0,0,0	7,5,11	0,4,1	218	149	0.0139557	0.279285	1.0,1.0,1.0	1.0,0.461,0.883	0.219
37033	"ENSG00000172456"	"FGGY"	chr1	+	59667282	59667403	59660218	59660293	59757930	59757992	37033	9,7,6	1,0,0	8,7,10	2,4,0	270	149	0.00109853	0.0530466	0.832,1.0,1.0	0.688,0.491,1.0	0.218
58732	"ENSG00000087206"	"UIMC1"	chr5	-	176968554	176969291	176958092	176958154	176969600	176969706	58732	4,3,4	1,0,0	3,12,6	1,3,1	298	149	0.00223893	0.0840645	0.667,1.0,1.0	0.6,0.667,0.75	0.217
42757	"ENSG00000224043"	"CCNT2-AS1"	chr2	-	134877519	134877643	134868943	134869041	134918562	134918710	42757	2,2,1	0,0,1	2,1,2	2,0,2	273	149	0.00501178	0.144856	1.0,1.0,0.353	0.353,1.0,0.353	0.216
58776	"ENSG00000132819"	"RBM38"	chr20	+	57392396	57392492	57391452	57391795	57392653	57392777	58776	1,2,3	0,1,5	0,1,1	6,3,0	245	149	0.021298	0.362595	1.0,0.549,0.267	0.0,0.169,1.0	0.216
5914	"ENSG00000154639"	"CXADR"	chr21	+	17561337	17561476	17558975	17559131	17565427	17565611	5914	18,6,8	0,0,3	10,10,4	7,0,2	288	149	0.0204549	0.353429	1.0,1.0,0.58	0.425,1.0,0.509	0.215
1627	"ENSG00000105483"	"CARD8"	chr19	-	48249522	48249633	48240961	48241063	48249750	48249810	1627	6,25,22	5,0,0	8,17,23	6,4,8	260	149	0.0113894	0.24686	0.407,1.0,1.0	0.433,0.709,0.622	0.214
45543	"ENSG00000143363"	"PRUNE1"	chr1	+	151017811	151017904	151008419	151008671	151025514	151025673	45543	14,25,15	0,0,0	16,12,17	4,4,0	242	149	2.79695e-05	0.00456988	1.0,1.0,1.0	0.711,0.649,1.0	0.213
51684	"ENSG00000204839"	"MROH6"	chr8	-	143568141	143568261	143567785	143567888	143568551	143568719	51684	58,57,63	9,11,2	75,35,33	25,14,11	269	149	0.000570088	0.0337172	0.781,0.742,0.946	0.624,0.581,0.624	0.213
54020	"ENSG00000124788"	"ATXN1"	chr6	-	16753232	16753347	16735453	16739918	16761297	16761370	54020	1,2,2	0,0,0	1,6,5	0,6,0	264	149	0.0115689	0.249523	1.0,1.0,1.0	1.0,0.361,1.0	0.213
47008	"ENSG00000062194"	"GPBP1"	chr5	+	57214073	57214193	57175447	57176400	57230845	57230969	47008	21,26,13	0,0,1	24,27,3	0,4,2	269	149	0.00914448	0.214844	1.0,1.0,0.878	1.0,0.789,0.454	0.212
32875	"ENSG00000072135"	"PTPN18"	chr2	+	130359232	130359309	130358863	130358975	130369132	130369201	32875	11,17,7	4,2,3	8,7,26	8,4,15	226	149	0.0319047	0.464637	0.645,0.849,0.606	0.397,0.536,0.533	0.211
26713	"ENSG00000180182"	"MED14"	chrX	-	40666719	40666851	40664306	40664489	40671860	40671972	26713	26,35,18	1,0,0	20,42,25	10,6,0	281	149	1.40441e-05	0.00282318	0.932,1.0,1.0	0.515,0.788,1.0	0.21
68903	"ENSG00000147394"	"ZNF185"	chrX	+	152922719	152922809	152922172	152922256	152931671	152931776	68903	15,15,34	0,5,10	5,25,36	2,10,24	239	149	0.0300215	0.448156	1.0,0.652,0.679	0.609,0.609,0.483	0.21
54183	"ENSG00000153094"	"BCL2L11"	chr2	+	111150043	111150147	111123732	111124139	111164132	111164231	54183	12,15,18	0,0,0	5,15,16	5,0,0	253	149	0.0362656	0.5018	1.0,1.0,1.0	0.371,1.0,1.0	0.21
25262	"ENSG00000185798"	"WDR53"	chr3	-	196560995	196561491	196554176	196554807	196567190	196567310	25262	10,17,15	0,1,0	6,16,13	2,4,0	298	149	0.00149187	0.0663132	1.0,0.895,1.0	0.6,0.667,1.0	0.209
10359	"ENSG00000248508"	"SRP14-AS1"	chr15	+	40060096	40060263	40045960	40046069	40065220	40065705	10359	1,2,10	2,19,3	2,0,1	4,3,10	298	149	0.0106515	0.236141	0.2,0.05,0.625	0.2,0.0,0.048	0.209
54909	"ENSG00000124275"	"MTRR"	chr5	+	7873372	7873512	7870769	7870923	7875257	7875375	54909	3,2,7	2,6,2	2,1,0	1,5,4	289	149	0.0097751	0.224553	0.436,0.147,0.643	0.508,0.093,0.0	0.208
60009	"ENSG00000244219"	"TMEM225B"	chr7	+	99606747	99606894	99600204	99600285	99607672	99607810	60009	3,6,10	0,0,3	4,4,6	2,2,0	296	149	0.0462847	0.587707	1.0,1.0,0.627	0.502,0.502,1.0	0.208
5125	"ENSG00000181038"	"METTL23"	chr17	+	76729689	76729794	76726838	76727178	76732977	76733215	5125	48,78,111	11,21,14	27,63,62	20,22,31	254	149	0.000717711	0.0396926	0.719,0.685,0.823	0.442,0.627,0.54	0.206
2287	"ENSG00000273032"	"DGCR5"	chr22	+	18988090	18988195	18987756	18987900	18989579	18994628	2287	4,1,5	1,0,0	6,2,7	5,0,2	254	149	9.79012e-05	0.0105198	0.701,1.0,1.0	0.413,1.0,0.672	0.205
71314	"ENSG00000258301"	"VASH1-AS1"	chr14	-	76783692	76783851	76782134	76782776	76786084	76786154	71314	2,13,0	1,8,14	0,2,0	2,2,5	298	149	0.00517986	0.148395	0.5,0.448,0.0	0.0,0.333,0.0	0.205
7263	"ENSG00000103248"	"MTHFSD"	chr16	-	86552178	86552292	86548463	86548577	86554644	86554748	7263	8,31,22	1,0,0	20,13,8	0,7,2	263	149	7.95363e-05	0.0093487	0.819,1.0,1.0	1.0,0.513,0.694	0.204
38863	"ENSG00000001460"	"STPG1"	chr1	-	24383866	24384003	24379652	24379823	24391560	24391679	38863	15,9,5	0,1,0	4,11,14	2,0,3	286	149	0.00996189	0.226898	1.0,0.824,1.0	0.51,1.0,0.709	0.202
18377	"ENSG00000245248"	"USP2-AS1"	chr11	+	119394980	119395154	119381770	119381908	119469808	119469975	18377	48,19,10	1,0,0	49,33,16	11,1,3	298	149	7.44298e-06	0.00177689	0.96,1.0,1.0	0.69,0.943,0.727	0.2
13818	"ENSG00000258555"	"SPECC1L-ADORA2A"	chr22	+	24338385	24338477	24334409	24334573	24363260	24363344	13818	9,16,6	0,1,0	6,6,7	1,0,4	241	149	0.00642068	0.171579	1.0,0.908,1.0	0.788,1.0,0.52	0.2
55395	"ENSG00000143740"	"SNAP47"	chr1	+	227731584	227731747	227728538	227728786	227758994	227759485	55395	6,3,5	0,1,0	3,0,3	0,7,0	298	149	0.0248318	0.398803	1.0,0.6,1.0	1.0,0.0,1.0	0.2
52763	"ENSG00000242086"	"MUC20-OT1"	chr3	+	195663623	195663832	195662570	195662733	195664085	195664109	52763	0,4,6	2,7,4	0,1,0	7,9,6	298	149	4.99214e-05	0.00673215	0.0,0.222,0.429	0.0,0.053,0.0	0.199
56987	"ENSG00000127507"	"ADGRE2"	chr19	-	14766234	14766381	14765657	14765804	14766977	14767109	56987	1,9,3	13,5,3	0,0,2	2,5,3	296	149	0.00176121	0.072771	0.037,0.475,0.335	0.0,0.0,0.251	0.199
69686	"ENSG00000156735"	"BAG4"	chr8	+	38192687	38192795	38176854	38177139	38207511	38207741	69686	14,2,4	1,0,0	7,21,8	2,1,2	257	149	0.0116038	0.249896	0.89,1.0,1.0	0.67,0.924,0.699	0.199
35350	"ENSG00000106327"	"TFR2"	chr7	-	100632081	100632198	100630888	100631052	100633000	100633104	35350	18,7,10	0,0,4	18,8,3	8,6,0	266	149	0.0235829	0.386022	1.0,1.0,0.583	0.558,0.428,1.0	0.199
31851	"ENSG00000288558"	"DUS4L-BCAP29"	chr7	+	107573703	107573821	107571144	107571266	107575187	107575310	31851	4,3,1	0,1,0	3,8,5	4,0,1	267	149	0.0082845	0.201548	1.0,0.626,1.0	0.295,1.0,0.736	0.198
26129	"ENSG00000254959"	"INMT-MINDY4"	chr7	+	30839199	30839316	30836657	30836764	30850453	30850555	26129	1,5,1	0,1,0	8,2,7	1,0,8	266	149	0.000427773	0.0269482	1.0,0.737,1.0	0.818,1.0,0.329	0.197
16330	"ENSG00000198825"	"INPP5F"	chr10	+	119791516	119791645	119781634	119781771	119791868	119792036	16330	29,37,30	1,0,0	7,46,22	7,0,0	278	149	0.0196741	0.344465	0.94,1.0,1.0	0.349,1.0,1.0	0.197
11355	"ENSG00000140043"	"PTGR2"	chr14	+	73879095	73879305	73876997	73877168	73880054	73880176	11355	54,16,5	1,0,0	45,24,12	0,0,10	298	149	0.0105485	0.234585	0.964,1.0,1.0	1.0,1.0,0.375	0.196
33337	"ENSG00000189223"	"PAX8-AS1"	chr2	+	113259263	113259584	113255389	113255549	113263277	113263334	33337	13,38,48	1,1,2	11,22,39	3,2,10	298	149	0.00057714	0.0339658	0.867,0.95,0.923	0.647,0.846,0.661	0.195
21420	"ENSG00000005801"	"ZNF195"	chr11	-	3373576	3373675	3371576	3371703	3379037	3379139	21420	1,6,4	4,6,12	0,2,0	5,11,7	248	149	0.000275909	0.0199044	0.131,0.375,0.167	0.0,0.098,0.0	0.192
47305	"ENSG00000143147"	"GPR161"	chr1	-	168114455	168114549	168104476	168104894	168134905	168135037	47305	10,29,16	0,0,1	13,11,17	2,3,2	243	149	0.00032753	0.0223644	1.0,1.0,0.907	0.799,0.692,0.839	0.192
12265	"ENSG00000132470"	"ITGB4"	chr17	+	75739671	75739705	75737321	75737444	75739879	75739905	12265	198,186,121	19,22,28	252,137,82	41,63,67	183	149	0.000547463	0.0327581	0.895,0.873,0.779	0.833,0.639,0.499	0.192
46135	"ENSG00000198887"	"SMC5"	chr9	+	70346604	70346649	70344143	70344269	70347065	70347161	46135	6,3,1	2,0,1	12,7,3	12,1,6	194	149	0.0264544	0.415353	0.697,1.0,0.434	0.434,0.843,0.277	0.192
57790	"ENSG00000164620"	"RELL2"	chr5	+	141638169	141638409	141636949	141637741	141638794	141638860	57790	91,76,59	10,6,0	93,51,43	16,16,7	298	149	0.000760212	0.0414663	0.82,0.864,1.0	0.744,0.614,0.754	0.191
30169	"ENSG00000154309"	"DISP1"	chr1	+	222836995	222837066	222835118	222835215	222837218	222837380	30169	15,8,14	1,1,0	7,9,26	3,3,2	220	149	0.00175844	0.0727404	0.91,0.844,1.0	0.612,0.67,0.898	0.191
20868	"ENSG00000152219"	"ARL14EP"	chr11	+	30330885	30331374	30323103	30323202	30332865	30332993	20868	32,26,26	0,0,0	25,10,14	0,4,1	298	149	0.0195901	0.343952	1.0,1.0,1.0	1.0,0.556,0.875	0.19
12942	"ENSG00000102543"	"CDADC1"	chr13	+	49259345	49259523	49255838	49255913	49267489	49268059	12942	13,15,31	0,0,2	7,28,19	0,4,8	298	149	0.000281781	0.0202871	1.0,1.0,0.886	1.0,0.778,0.543	0.188
69669	"ENSG00000169084"	"DHRSX"	chrX	-	2392353	2392474	2291501	2291603	2408744	2408813	69669	8,7,8	4,17,14	3,7,4	11,21,20	270	149	0.0344146	0.487306	0.525,0.185,0.24	0.131,0.155,0.099	0.188
34339	"ENSG00000229180"	"AC006001"	chr7	-	66560578	66560675	66554584	66554837	66573384	66573550	34339	9,11,8	4,5,3	5,14,11	4,16,9	246	149	0.0448924	0.577252	0.577,0.571,0.618	0.431,0.346,0.425	0.188
18673	"ENSG00000090661"	"CERS4"	chr19	+	8210705	8210862	8209312	8209494	8251075	8251171	18673	46,97,208	0,14,0	124,141,178	17,37,26	298	149	4.18941e-06	0.00118973	1.0,0.776,1.0	0.785,0.656,0.774	0.187
58633	"ENSG00000181085"	"MAPK15"	chr8	+	143717693	143717792	143716339	143716443	143718046	143718076	58633	36,17,22	2,1,0	32,36,17	11,0,6	248	149	0.0010323	0.0508085	0.915,0.911,1.0	0.636,1.0,0.63	0.187
67058	"ENSG00000046647"	"GEMIN8"	chrX	-	14026051	14026221	14021463	14021511	14029776	14029892	67058	2,15,7	2,11,15	5,1,2	9,8,10	298	149	0.0159268	0.302009	0.333,0.405,0.189	0.217,0.059,0.091	0.187
29076	"ENSG00000087266"	"SH3BP2"	chr4	+	2814810	2814917	2812289	2812477	2820613	2820753	29076	1,0,4	7,8,2	0,0,1	3,6,10	256	149	0.0465652	0.588761	0.077,0.0,0.538	0.0,0.0,0.055	0.187
22428	"ENSG00000136883"	"KIF12"	chr9	-	114096050	114096207	114095213	114095332	114096386	114096478	22428	28,28,19	0,2,1	39,31,36	5,10,4	298	149	0.000272156	0.0197933	1.0,0.875,0.905	0.796,0.608,0.818	0.186
53603	"ENSG00000168743"	"NPNT"	chr4	+	105958470	105958557	105942306	105942702	105959027	105959126	53603	5,5,5	0,0,1	4,14,3	0,2,3	236	149	0.00970731	0.223806	1.0,1.0,0.759	1.0,0.815,0.387	0.186
4885	"ENSG00000169689"	"CENPX"	chr17	-	82019509	82019694	82019292	82019381	82022825	82022879	4885	37,32,33	7,4,0	22,26,14	4,7,5	298	149	0.0421893	0.554803	0.725,0.8,1.0	0.733,0.65,0.583	0.186
25393	"ENSG00000114439"	"BBX"	chr3	+	107789786	107789876	107778370	107778519	107791239	107791299	25393	9,7,12	1,0,0	8,13,7	3,4,0	239	149	9.54842e-05	0.0105198	0.849,1.0,1.0	0.624,0.67,1.0	0.185
47793	"ENSG00000068903"	"SIRT2"	chr19	-	38898378	38898425	38893818	38893867	38898793	38898918	47793	7,7,17	1,1,0	4,11,14	1,3,6	196	149	0.000209076	0.0167363	0.842,0.842,1.0	0.753,0.736,0.639	0.185
58605	"ENSG00000136280"	"CCM2"	chr7	+	45069825	45069961	45038252	45038426	45073459	45073571	58605	10,11,19	0,0,2	4,3,19	0,1,5	285	149	0.00166203	0.0704855	1.0,1.0,0.832	1.0,0.611,0.665	0.185
18469	"ENSG00000186174"	"BCL9L"	chr11	-	118909913	118910015	118908416	118908655	118925237	118925453	18469	39,87,55	16,17,20	31,44,47	33,27,22	251	149	0.00439746	0.134066	0.591,0.752,0.62	0.358,0.492,0.559	0.185
55015	"ENSG00000119397"	"CNTRL"	chr9	+	121171407	121171548	121169610	121169816	121173242	121173509	55015	12,10,2	0,2,1	4,0,1	1,3,0	290	149	0.0312505	0.459788	1.0,0.72,0.507	0.673,0.0,1.0	0.185
1213	"ENSG00000171574"	"ZNF584"	chr19	+	58409964	58410091	58408776	58409165	58415523	58415646	1213	11,20,12	6,10,11	5,11,4	5,18,7	276	149	0.0217439	0.366655	0.497,0.519,0.371	0.351,0.248,0.236	0.184
18402	"ENSG00000169062"	"UPF3A"	chr13	+	114286301	114286400	114282836	114282943	114286518	114286629	18402	8,19,13	4,8,6	7,9,6	4,13,7	248	149	0.0356517	0.496377	0.546,0.588,0.566	0.513,0.294,0.34	0.184
1224	"ENSG00000198131"	"ZNF544"	chr19	+	58237248	58237334	58230393	58230497	58243964	58244056	1224	2,1,1	4,3,4	0,0,0	3,1,3	235	149	0.0488208	0.604735	0.241,0.174,0.137	0.0,0.0,0.0	0.184
39984	"ENSG00000178078"	"STAP2"	chr19	-	4326941	4327007	4325395	4325545	4327123	4327226	39984	52,25,26	4,2,0	35,14,12	12,0,6	215	149	0.00483137	0.141396	0.9,0.897,1.0	0.669,1.0,0.581	0.182
26111	"ENSG00000251022"	"THAP9-AS1"	chr4	-	82895691	82895774	82893008	82894847	82900076	82900223	26111	10,6,0	6,4,2	0,4,0	8,3,1	232	149	0.0268642	0.418483	0.517,0.491,0.0	0.0,0.461,0.0	0.182
25474	"ENSG00000121931"	"LRIF1"	chr1	-	110951287	110952815	110949850	110950123	110963620	110963922	25474	3,3,5	2,17,15	0,2,0	10,8,5	298	149	0.00168865	0.0709222	0.429,0.081,0.143	0.0,0.111,0.0	0.181
70266	"ENSG00000179029"	"TMEM107"	chr17	-	8175958	8176026	8174002	8174272	8176199	8176316	70266	34,66,53	12,17,3	45,44,37	27,26,11	217	149	0.00763483	0.190816	0.66,0.727,0.924	0.534,0.537,0.698	0.181
35289	"ENSG00000228794"	"LINC01128"	chr1	+	829002	829104	827597	827775	841199	841373	35289	3,12,15	0,0,0	6,10,14	1,0,4	251	149	0.0130208	0.267919	1.0,1.0,1.0	0.781,1.0,0.675	0.181
43696	"ENSG00000112200"	"ZNF451"	chr6	+	57150718	57150862	57147089	57148693	57152220	57152351	43696	2,8,4	0,0,0	18,10,3	0,6,0	293	149	0.00898757	0.212273	1.0,1.0,1.0	1.0,0.459,1.0	0.18
13479	"ENSG00000090612"	"ZNF268"	chr12	+	133193427	133193533	133191720	133192003	133202143	133202310	13479	2,2,14	1,0,0	1,0,4	0,6,0	255	149	0.0332603	0.476238	0.539,1.0,1.0	1.0,0.0,1.0	0.18
40709	"ENSG00000112855"	"HARS2"	chr5	+	140696028	140696201	140695737	140695845	140696520	140696614	40709	33,41,47	0,0,0	28,52,37	4,4,4	298	149	1.78864e-06	0.000703809	1.0,1.0,1.0	0.778,0.867,0.822	0.178
40993	"ENSG00000141127"	"PRPSAP2"	chr17	+	18865468	18865564	18856298	18856429	18865801	18865900	40993	7,21,22	2,0,0	7,20,13	3,6,1	245	149	0.00044497	0.0278355	0.68,1.0,1.0	0.587,0.67,0.888	0.178
508	"ENSG00000100401"	"RANGAP1"	chr22	-	41284900	41285153	41280932	41281082	41285543	41285965	508	39,44,53	28,19,47	27,21,21	24,42,38	298	149	0.00331199	0.110037	0.411,0.537,0.361	0.36,0.2,0.216	0.178
59112	"ENSG00000114812"	"VIPR1"	chr3	+	42525886	42525993	42519222	42519330	42531470	42531531	59112	8,11,12	0,0,0	9,11,8	6,0,0	256	149	0.00989528	0.226389	1.0,1.0,1.0	0.466,1.0,1.0	0.178
49475	"ENSG00000124120"	"TTPAL"	chr20	+	44478623	44478647	44475887	44475991	44479984	44480444	49475	0,1,8	2,1,6	0,0,3	2,7,3	173	149	0.030467	0.452541	0.0,0.463,0.535	0.0,0.0,0.463	0.178
36308	"ENSG00000135766"	"EGLN1"	chr1	-	231367568	231368187	231365939	231366475	231370561	231370698	36308	14,18,20	0,0,0	11,23,34	0,5,5	298	149	6.6196e-06	0.00164488	1.0,1.0,1.0	1.0,0.697,0.773	0.177
67092	"ENSG00000141298"	"SSH2"	chr17	-	29848848	29848929	29793615	29793937	29929937	29930167	67092	0,1,6	9,4,6	0,0,0	3,1,3	230	149	0.00158142	0.0685065	0.0,0.139,0.393	0.0,0.0,0.0	0.177
9186	"ENSG00000173575"	"CHD2"	chr15	+	92998148	92998261	92997252	92997403	92998498	92998621	9186	0,8,0	6,4,10	0,0,0	5,4,5	262	149	0.0126602	0.26399	0.0,0.532,0.0	0.0,0.0,0.0	0.177
64476	"ENSG00000154743"	"TSEN2"	chr3	+	12532661	12532773	12529761	12531659	12539160	12539623	64476	10,26,1	0,2,0	7,10,12	4,1,0	261	149	0.0239567	0.388938	1.0,0.881,1.0	0.5,0.851,1.0	0.177
35192	"ENSG00000185404"	"SP140L"	chr2	+	230328756	230328831	230327183	230327301	230357804	230357967	35192	8,14,14	0,0,0	7,15,19	2,3,0	224	149	0.0257528	0.408823	1.0,1.0,1.0	0.7,0.769,1.0	0.177
3647	"ENSG00000105173"	"CCNE1"	chr19	+	29812531	29812578	29811990	29812152	29812688	29812776	3647	18,20,60	1,1,3	16,29,41	4,9,7	196	149	0.000243826	0.0185364	0.932,0.938,0.938	0.753,0.71,0.817	0.176
43117	"ENSG00000205593"	"DENND6B"	chr22	-	50316173	50316253	50316024	50316087	50317292	50317373	43117	11,8,8	0,0,0	11,9,8	8,0,0	229	149	0.00243258	0.0891646	1.0,1.0,1.0	0.472,1.0,1.0	0.176
6152	"ENSG00000275832"	"ARHGAP23"	chr17	+	38477578	38477705	38471862	38472006	38477827	38477896	6152	8,27,35	0,0,0	20,37,38	4,0,7	276	149	1.23701e-05	0.00255853	1.0,1.0,1.0	0.73,1.0,0.746	0.175
57039	"ENSG00000013619"	"MAMLD1"	chrX	+	150445453	150445612	150363283	150363530	150462771	150462846	57039	4,2,6	0,0,0	10,9,10	0,5,0	298	149	0.0251553	0.402371	1.0,1.0,1.0	1.0,0.474,1.0	0.175
1467	"ENSG00000142528"	"ZNF473"	chr19	+	50030891	50031091	50025892	50026122	50039160	50039287	1467	6,12,6	0,0,0	10,9,12	0,5,0	298	149	0.0262545	0.413121	1.0,1.0,1.0	1.0,0.474,1.0	0.175
23494	"ENSG00000135722"	"FBXL8"	chr16	+	67163511	67163852	67161734	67161937	67164018	67164065	23494	4,2,9	1,0,0	10,2,3	2,0,2	298	149	0.0426129	0.558321	0.667,1.0,1.0	0.714,1.0,0.429	0.175
48376	"ENSG00000198860"	"TSEN15"	chr1	+	184070615	184070732	184054727	184054863	184072156	184072298	48376	1,3,3	5,6,3	1,0,0	3,9,6	266	149	0.000795368	0.0426046	0.101,0.219,0.359	0.157,0.0,0.0	0.174
41678	"ENSG00000006282"	"SPATA20"	chr17	+	50547719	50547767	50547152	50547285	50548282	50548453	41678	21,53,33	3,4,0	29,12,16	13,6,0	197	149	0.00630263	0.169183	0.841,0.909,1.0	0.628,0.602,1.0	0.173
1844	"ENSG00000079462"	"PAFAH1B3"	chr19	-	42300041	42300092	42297035	42297365	42301949	42302039	1844	10,5,20	9,23,24	11,3,8	35,19,31	200	149	0.0289605	0.438537	0.453,0.139,0.383	0.19,0.105,0.161	0.173
27071	"ENSG00000123739"	"PLA2G12A"	chr4	-	109718688	109718759	109717547	109717713	109729601	109729974	27071	20,16,48	1,0,1	14,19,43	5,4,1	220	149	0.0003029	0.0213353	0.931,1.0,0.97	0.655,0.763,0.967	0.172
57497	"ENSG00000158402"	"CDC25C"	chr5	-	138329552	138329647	138328483	138328529	138330986	138331180	57497	51,97,40	8,13,3	66,62,42	23,26,8	244	149	0.00104123	0.0511073	0.796,0.82,0.891	0.637,0.593,0.762	0.172
21783	"ENSG00000148396"	"SEC16A"	chr9	-	136445051	136445111	136443822	136443900	136445644	136445719	21783	5,18,17	6,17,18	3,6,12	13,13,20	209	149	0.0233012	0.382625	0.373,0.43,0.402	0.141,0.248,0.3	0.172
46381	"ENSG00000117419"	"ERI3"	chr1	-	44352849	44352925	44319627	44319744	44354891	44355061	46381	57,59,75	7,14,16	70,58,50	39,15,26	225	149	0.00232537	0.086135	0.844,0.736,0.756	0.543,0.719,0.56	0.171
20151	"ENSG00000100263"	"RHBDD3"	chr22	-	29260701	29260868	29260325	29260613	29261199	29261425	20151	21,29,30	0,0,1	22,26,20	3,3,2	298	149	0.00015746	0.0141564	1.0,1.0,0.938	0.786,0.813,0.833	0.169
24328	"ENSG00000145216"	"FIP1L1"	chr4	+	53391429	53391498	53391008	53391139	53399729	53399839	24328	41,54,71	8,23,16	62,41,67	41,26,29	218	149	0.00517329	0.148362	0.778,0.616,0.752	0.508,0.519,0.612	0.169
1827	"ENSG00000079435"	"LIPE"	chr19	-	42406160	42406388	42405384	42405561	42407173	42407468	1827	48,58,31	4,5,6	42,51,35	15,7,14	298	149	0.00969447	0.223654	0.857,0.853,0.721	0.583,0.785,0.556	0.169
55635	"ENSG00000067113"	"PLPP1"	chr5	-	55475298	55475450	55467868	55468149	55534571	55534964	55635	10,51,63	0,0,5	18,43,32	3,4,5	298	149	0.00994236	0.226683	1.0,1.0,0.863	0.75,0.843,0.762	0.169
5957	"ENSG00000126581"	"BECN1"	chr17	-	42811654	42811797	42810133	42810928	42814523	42814593	5957	52,75,72	0,4,0	37,86,51	5,8,8	292	149	1.25639e-05	0.00258369	1.0,0.905,1.0	0.791,0.846,0.765	0.168
36931	"ENSG00000079974"	"RABL2B"	chr22	-	50783038	50783286	50782233	50782347	50783500	50783663	36931	4,5,0	4,7,6	1,0,0	5,8,1	298	149	0.000334228	0.0226503	0.333,0.263,0.0	0.091,0.0,0.0	0.168
57752	"ENSG00000145996"	"CDKAL1"	chr6	+	20535086	20535199	20534480	20534574	20535350	20535394	57752	2,4,1	5,6,12	0,0,0	8,9,6	262	149	0.00134861	0.0613025	0.185,0.275,0.045	0.0,0.0,0.0	0.168
19897	"ENSG00000149743"	"TRPT1"	chr11	-	64225785	64225869	64224800	64225580	64226049	64226148	19897	283,297,331	42,0,0	334,264,71	43,0,50	233	149	0.0254415	0.40532	0.812,1.0,1.0	0.832,1.0,0.476	0.168
2356	"ENSG00000167491"	"GATAD2A"	chr19	+	19436130	19436219	19385825	19386138	19465344	19465614	2356	1,2,8	19,12,7	0,0,1	8,11,14	238	149	0.000213137	0.0170233	0.032,0.094,0.417	0.0,0.0,0.043	0.167
17133	"ENSG00000079393"	"DUSP13"	chr10	-	75101866	75101961	75097711	75097885	75109008	75109099	17133	1,16,29	0,0,1	6,13,23	0,6,2	244	149	0.000226008	0.0177839	1.0,1.0,0.947	1.0,0.57,0.875	0.167
31531	"ENSG00000017260"	"ATP2C1"	chr3	+	131001219	131001314	130999517	130999659	131016151	131016684	31531	49,37,29	1,2,1	24,41,15	2,6,5	244	149	0.00126538	0.0586601	0.968,0.919,0.947	0.88,0.807,0.647	0.167
8730	"ENSG00000129197"	"RPAIN"	chr17	+	5426235	5426299	5425970	5426082	5432541	5432876	8730	33,53,52	1,1,3	36,43,45	6,8,10	213	149	2.09245e-05	0.00370653	0.958,0.974,0.924	0.808,0.79,0.759	0.166
30408	"ENSG00000071462"	"BUD23"	chr7	+	73683766	73683901	73683600	73683673	73686635	73686731	30408	16,25,45	0,0,0	23,43,25	12,0,0	284	149	0.00118957	0.0561296	1.0,1.0,1.0	0.501,1.0,1.0	0.166
4728	"ENSG00000101608"	"MYL12A"	chr18	+	3249360	3249443	3247812	3247909	3249561	3249723	4728	3,15,10	0,0,0	4,15,6	0,4,1	232	149	0.0124239	0.260581	1.0,1.0,1.0	1.0,0.707,0.794	0.166
71465	"ENSG00000147889"	"CDKN2A"	chr9	-	21970975	21971208	21967990	21968242	21974677	21974858	71465	17,33,6	3,0,0	12,5,13	1,4,0	298	149	0.0333702	0.477191	0.739,1.0,1.0	0.857,0.385,1.0	0.166
34296	"ENSG00000163257"	"DCAF16"	chr4	-	17805106	17805225	17800654	17804771	17810446	17810757	34296	27,23,25	0,0,0	25,26,24	4,0,5	268	149	1.9666e-05	0.00355398	1.0,1.0,1.0	0.777,1.0,0.727	0.165
23059	"ENSG00000109390"	"NDUFC1"	chr4	-	139297384	139297443	139295731	139295960	139300601	139301210	23059	4,2,2	6,19,13	0,0,0	7,17,19	208	149	0.00044366	0.0278022	0.323,0.07,0.099	0.0,0.0,0.0	0.164
61382	"ENSG00000248712"	"CCDC153"	chr11	-	119195423	119195499	119194922	119194994	119195798	119196000	61382	16,14,8	1,0,0	10,24,26	4,4,0	225	149	0.000617457	0.0358667	0.914,1.0,1.0	0.623,0.799,1.0	0.164
148	"ENSG00000159263"	"SIM2"	chr21	+	36741716	36741864	36731044	36731151	36743386	36743555	148	17,32,39	0,0,0	23,15,27	3,3,0	297	149	0.00392906	0.123541	1.0,1.0,1.0	0.794,0.715,1.0	0.164
959	"ENSG00000186998"	"EMID1"	chr22	+	29254202	29254287	29243444	29243489	29258816	29259597	959	171,124,113	0,2,7	163,114,107	24,36,6	234	149	1.41091e-08	2.19501e-05	1.0,0.975,0.911	0.812,0.668,0.919	0.162
56083	"ENSG00000171617"	"ENC1"	chr5	-	74637564	74637701	74634683	74636498	74640306	74640728	56083	1,7,2	3,7,14	0,1,1	3,12,16	286	149	0.000424109	0.026809	0.148,0.343,0.069	0.0,0.042,0.032	0.162
32980	"ENSG00000136715"	"SAP130"	chr2	-	127977984	127978089	127954985	127955344	127986784	127986959	32980	37,54,40	10,18,14	29,27,62	23,13,38	254	149	0.00697148	0.179463	0.685,0.638,0.626	0.425,0.549,0.489	0.162
60608	"ENSG00000112039"	"FANCE"	chr6	+	35460551	35460618	35459681	35459760	35466243	35466961	60608	42,46,26	0,2,0	44,31,26	6,4,5	216	149	7.34861e-06	0.00177668	1.0,0.941,1.0	0.835,0.842,0.782	0.161
18943	"ENSG00000042429"	"MED17"	chr11	+	93807500	93809876	93801834	93801972	93811852	93812347	18943	20,28,32	0,0,0	22,29,27	4,4,0	298	149	9.62375e-05	0.0105198	1.0,1.0,1.0	0.733,0.784,1.0	0.161
11402	"ENSG00000029364"	"SLC39A9"	chr14	+	69453240	69453309	69442068	69442266	69454811	69454897	11402	3,17,27	0,2,0	5,19,29	4,0,2	218	149	0.0214731	0.364715	1.0,0.853,1.0	0.461,1.0,0.908	0.161
10822	"ENSG00000133313"	"CNDP2"	chr18	+	74497508	74497726	74496371	74496431	74499936	74500033	10822	3,7,2	3,27,14	0,1,1	14,25,30	298	149	0.000135775	0.012921	0.333,0.115,0.067	0.0,0.02,0.016	0.16
20055	"ENSG00000124920"	"MYRF"	chr11	+	61780711	61780792	61780221	61780290	61780959	61781045	20055	1,11,7	28,15,22	0,1,0	15,16,18	230	149	5.90027e-06	0.00152988	0.023,0.322,0.171	0.0,0.039,0.0	0.159
59271	"ENSG00000137266"	"SLC22A23"	chr6	-	3410187	3410342	3323341	3324002	3455905	3456043	59271	5,19,17	0,0,0	12,11,25	0,5,0	298	149	0.0344992	0.488017	1.0,1.0,1.0	1.0,0.524,1.0	0.159
44417	"ENSG00000143612"	"C1orf43"	chr1	-	154219835	154219937	154214456	154214574	154220341	154220533	44417	156,250,154	33,56,11	166,151,196	65,59,56	251	149	0.000257115	0.019127	0.737,0.726,0.893	0.603,0.603,0.675	0.158
38176	"ENSG00000167733"	"HSD11B1L"	chr19	+	5686899	5686991	5684818	5685119	5687281	5687304	38176	16,14,5	0,2,0	35,12,5	8,0,2	241	149	0.00220929	0.0835654	1.0,0.812,1.0	0.73,1.0,0.607	0.158
36210	"ENSG00000058056"	"USP13"	chr3	+	179757051	179757078	179754731	179754854	179761111	179761255	36210	11,7,10	0,2,1	8,6,5	2,2,2	176	149	0.026633	0.416695	1.0,0.748,0.894	0.772,0.717,0.679	0.158
50399	"ENSG00000061273"	"HDAC7"	chr12	-	47802223	47802274	47798784	47798972	47819766	47819866	50399	6,7,1	2,1,0	2,1,8	1,0,7	200	149	0.0344886	0.488017	0.691,0.839,1.0	0.598,1.0,0.46	0.157
28331	"ENSG00000178038"	"ALS2CL"	chr3	-	46683133	46683326	46682028	46682094	46683781	46683848	28331	12,10,40	0,1,0	19,15,26	0,5,4	298	149	9.46567e-05	0.0105198	1.0,0.833,1.0	1.0,0.6,0.765	0.156
10070	"ENSG00000104047"	"DTWD1"	chr15	+	49631000	49631058	49625112	49625431	49632158	49632302	10070	7,5,0	43,4,9	3,0,1	34,10,13	207	149	0.0305273	0.452951	0.105,0.474,0.0	0.06,0.0,0.052	0.156
45828	"ENSG00000103168"	"TAF1C"	chr16	-	84184850	84184899	84183696	84183778	84186900	84187049	45828	8,8,22	0,2,1	9,14,17	3,4,3	198	149	0.00567459	0.157524	1.0,0.751,0.943	0.693,0.725,0.81	0.155
67755	"ENSG00000197256"	"KANK2"	chr19	-	11195621	11195820	11194474	11194590	11197484	11197521	67755	4,11,1	0,1,0	9,7,13	1,0,5	298	149	0.00204116	0.0793878	1.0,0.846,1.0	0.818,1.0,0.565	0.154
10786	"ENSG00000022976"	"ZNF839"	chr14	+	102335688	102335838	102334553	102334646	102338815	102338830	10786	5,37,27	0,0,0	12,23,31	5,0,0	298	149	0.0460838	0.586613	1.0,1.0,1.0	0.545,1.0,1.0	0.152
13362	"ENSG00000166979"	"EVA1C"	chr21	+	32503925	32504015	32495116	32495170	32514813	32514880	13362	12,15,8	0,1,0	11,18,22	5,0,2	239	149	0.00182277	0.0745157	1.0,0.903,1.0	0.578,1.0,0.873	0.151
59980	"ENSG00000068912"	"ERLEC1"	chr2	+	53808298	53808460	53801712	53801842	53809213	53809273	59980	23,50,82	7,6,13	34,50,25	16,14,9	298	149	0.0203871	0.352751	0.622,0.806,0.759	0.515,0.641,0.581	0.15
53690	"ENSG00000188895"	"MSL1"	chr17	+	40131536	40131584	40129244	40129627	40132033	40132042	53690	1,5,1	0,1,0	13,10,7	4,2,1	197	149	0.00113106	0.0540341	1.0,0.791,1.0	0.711,0.791,0.841	0.149
57946	"ENSG00000141391"	"PRELID3A"	chr18	+	12429349	12429436	12427220	12427323	12431149	12431463	57946	6,29,8	0,0,3	16,14,8	4,3,2	236	149	0.00897005	0.212139	1.0,1.0,0.627	0.716,0.747,0.716	0.149
5475	"ENSG00000170921"	"TANC2"	chr17	+	63418306	63418407	63415527	63415674	63419998	63422356	5475	18,8,20	2,0,0	30,7,5	2,0,3	250	149	0.0422655	0.555192	0.843,1.0,1.0	0.899,1.0,0.498	0.149
13654	"ENSG00000183955"	"KMT5A"	chr12	+	123389432	123389554	123383772	123384208	123390629	123390786	13654	45,56,37	0,2,2	31,41,38	1,8,8	271	149	0.000284932	0.0203502	1.0,0.939,0.91	0.945,0.738,0.723	0.148
57349	"ENSG00000164615"	"CAMLG"	chr5	+	134741062	134741523	134738547	134738792	134743986	134744052	57349	76,135,131	0,0,2	75,126,90	6,21,4	298	149	9.75274e-10	3.38929e-06	1.0,1.0,0.97	0.862,0.75,0.918	0.147
7981	"ENSG00000129455"	"KLK8"	chr19	-	51001531	51001709	51001097	51001175	51002407	51002711	7981	113,71,89	0,7,7	124,155,52	29,15,9	298	149	0.000350982	0.0234307	1.0,0.835,0.864	0.681,0.838,0.743	0.146
4445	"ENSG00000134759"	"ELP2"	chr18	+	36138794	36138872	36138094	36138426	36141136	36141191	4445	18,52,42	2,9,7	25,40,52	8,14,16	227	149	0.0176586	0.322706	0.855,0.791,0.798	0.672,0.652,0.681	0.146
18925	"ENSG00000166025"	"AMOTL1"	chr11	+	94795010	94795160	94768355	94768560	94799389	94799539	18925	8,31,17	1,2,1	10,17,18	2,4,3	298	149	0.0305961	0.453329	0.8,0.886,0.895	0.714,0.68,0.75	0.146
16085	"ENSG00000226210"	"WASH8P"	chr12	-	17722	17859	16968	17170	18036	18183	16085	45,57,30	3,3,1	39,17,27	3,4,5	286	149	0.0350049	0.492159	0.887,0.908,0.94	0.871,0.689,0.738	0.146
37935	"ENSG00000137693"	"YAP1"	chr11	+	102186017	102186131	102162455	102162571	102205892	102206074	37935	29,52,44	2,5,3	28,52,40	8,10,6	263	149	0.0104084	0.233036	0.891,0.855,0.893	0.665,0.747,0.791	0.145
12797	"ENSG00000165416"	"SUGT1"	chr13	+	52661474	52661570	52659178	52659249	52662648	52662702	12797	19,28,23	40,19,43	13,20,8	34,51,34	245	149	0.0184775	0.331577	0.224,0.473,0.245	0.189,0.193,0.125	0.145
23500	"ENSG00000237978"	"KCNMB2-AS1"	chr3	-	178841544	178841616	178749045	178749236	178859488	178859550	23500	5,7,1	14,8,22	0,5,2	12,24,33	221	149	0.0293749	0.442162	0.194,0.371,0.03	0.0,0.123,0.039	0.144
1493	"ENSG00000010361"	"FUZ"	chr19	-	49808716	49808823	49808573	49808638	49809162	49809258	1493	15,17,18	0,0,1	17,16,8	0,0,5	256	149	0.0442543	0.571045	1.0,1.0,0.913	1.0,1.0,0.482	0.144
49005	"ENSG00000168385"	"SEPTIN2"	chr2	+	241317498	241317599	241315943	241315982	241324215	241324241	49005	18,13,10	19,24,40	7,11,3	39,40,24	250	149	0.00624705	0.168448	0.361,0.244,0.13	0.097,0.141,0.069	0.143
29518	"ENSG00000106400"	"ZNHIT1"	chr7	+	101218318	101218485	101218165	101218217	101223476	101223556	29518	20,2,10	0,0,0	20,9,17	2,0,3	298	149	0.0194485	0.342474	1.0,1.0,1.0	0.833,1.0,0.739	0.143
43370	"ENSG00000101901"	"ALG13"	chrX	+	111686136	111686174	111684964	111685103	111687886	111688128	43370	14,6,1	34,19,51	1,0,0	21,28,35	187	149	1.64158e-06	0.000675161	0.247,0.201,0.015	0.037,0.0,0.0	0.142
33404	"ENSG00000178927"	"CYBC1"	chr17	-	82449173	82449292	82445863	82445960	82450699	82450743	33404	16,32,15	0,0,0	17,19,16	7,0,0	268	149	0.00319815	0.107452	1.0,1.0,1.0	0.575,1.0,1.0	0.142
24343	"ENSG00000109184"	"DCUN1D4"	chr4	+	51860542	51860663	51843102	51843267	51863436	51863507	24343	2,4,0	8,5,7	0,0,0	4,7,9	270	149	0.00985144	0.225531	0.121,0.306,0.0	0.0,0.0,0.0	0.142
12377	"ENSG00000065000"	"AP3D1"	chr19	-	2113335	2113413	2112859	2112967	2114124	2114302	12377	45,81,54	14,60,37	44,62,59	44,50,67	227	149	0.0304002	0.452089	0.678,0.47,0.489	0.396,0.449,0.366	0.142
26327	"ENSG00000197885"	"NKIRAS1"	chr3	-	23911328	23911446	23910810	23910921	23916783	23916969	26327	13,11,12	0,0,0	18,15,12	0,0,5	267	149	0.0390679	0.526526	1.0,1.0,1.0	1.0,1.0,0.573	0.142
32716	"ENSG00000165644"	"COMTD1"	chr10	-	75235615	75235743	75234937	75234992	75235834	75235957	32716	64,32,33	0,0,0	51,26,13	9,3,0	277	149	1.76592e-06	0.000703809	1.0,1.0,1.0	0.753,0.823,1.0	0.141
1525	"ENSG00000090554"	"FLT3LG"	chr19	+	49480297	49480476	49478908	49479047	49480551	49480620	1525	42,23,21	0,0,1	57,19,23	1,2,5	298	149	0.000766819	0.0416363	1.0,1.0,0.913	0.966,0.826,0.697	0.141
22245	"ENSG00000136828"	"RALGPS1"	chr9	+	127196473	127196631	127195090	127195217	127210694	127210778	22245	0,2,5	1,4,3	0,3,0	5,5,3	298	149	0.014714	0.288175	0.0,0.2,0.455	0.0,0.231,0.0	0.141
63422	"ENSG00000151006"	"PRSS53"	chr16	-	31084118	31084335	31083424	31083809	31084557	31084703	63422	15,1,8	0,2,0	14,0,14	0,5,2	298	149	0.037132	0.510262	1.0,0.2,1.0	1.0,0.0,0.778	0.141
60404	"ENSG00000242574"	"HLA-DMB"	chr6	-	32935535	32935652	32935341	32935377	32937171	32937456	60404	12,33,21	0,0,2	30,19,23	1,2,7	266	149	0.000638012	0.0364686	1.0,1.0,0.855	0.944,0.842,0.648	0.14
50931	"ENSG00000114745"	"GORASP1"	chr3	-	39103472	39103553	39100787	39101102	39107478	39107569	50931	11,15,8	1,0,0	9,22,19	2,0,5	230	149	0.00168872	0.0709222	0.877,1.0,1.0	0.745,1.0,0.711	0.14
59562	"ENSG00000007384"	"RHBDF1"	chr16	-	59298	59349	58973	59093	59418	59494	59562	11,2,15	0,0,1	4,17,16	1,0,4	200	149	0.0283071	0.433131	1.0,1.0,0.918	0.749,1.0,0.749	0.14
51893	"ENSG00000167608"	"TMC4"	chr19	-	54162101	54162285	54160877	54161033	54162672	54162770	51893	51,80,132	0,0,0	71,81,68	9,5,4	298	149	3.59927e-08	4.59961e-05	1.0,1.0,1.0	0.798,0.89,0.895	0.139
64453	"ENSG00000223705"	"NSUN5P1"	chr7	+	75414639	75414798	75412788	75412932	75414884	75415024	64453	0,2,7	1,7,4	0,3,0	6,7,2	298	149	0.0141031	0.281448	0.0,0.125,0.467	0.0,0.176,0.0	0.139
31985	"ENSG00000111325"	"OGFOD2"	chr12	+	122977980	122978091	122976870	122976970	122978359	122978569	31985	12,11,16	20,18,13	14,7,3	24,19,18	260	149	0.0463821	0.587901	0.256,0.259,0.414	0.251,0.174,0.087	0.139
13729	"ENSG00000110931"	"CAMKK2"	chr12	-	121244572	121244615	121237674	121240869	121245139	121245240	13729	12,2,1	15,30,23	0,0,2	13,32,29	192	149	0.000190847	0.0158443	0.383,0.049,0.033	0.0,0.0,0.051	0.138
35386	"ENSG00000123562"	"MORF4L2"	chrX	-	103684680	103684729	103678498	103678620	103685170	103685260	35386	55,46,33	2,6,9	53,31,29	14,9,11	198	149	0.0116071	0.249896	0.954,0.852,0.734	0.74,0.722,0.665	0.138
23490	"ENSG00000183763"	"TRAIP"	chr3	-	49844540	49844580	49840283	49840373	49847524	49847560	23490	11,14,5	0,3,0	16,16,4	0,4,2	189	149	0.0260554	0.411893	1.0,0.786,1.0	1.0,0.759,0.612	0.138
58715	"ENSG00000122203"	"KIAA1191"	chr5	-	176359480	176359567	176355570	176355749	176361601	176361761	58715	24,129,140	0,0,0	25,89,121	6,7,2	236	149	3.21912e-06	0.000992988	1.0,1.0,1.0	0.725,0.889,0.974	0.137
25029	"ENSG00000132405"	"TBC1D14"	chr4	+	7009876	7009948	7006631	7006726	7010652	7010777	25029	10,58,29	0,0,0	26,38,49	4,2,6	221	149	7.5598e-06	0.00177964	1.0,1.0,1.0	0.814,0.928,0.846	0.137
65494	"ENSG00000188186"	"LAMTOR4"	chr7	+	100149498	100149565	100148933	100148975	100153399	100153517	65494	32,26,38	0,0,0	41,29,33	0,14,0	216	149	0.000395822	0.0257514	1.0,1.0,1.0	1.0,0.588,1.0	0.137
66382	"ENSG00000143374"	"TARS2"	chr1	+	150496481	150496628	150492184	150492489	150496809	150496908	66382	73,103,95	0,1,6	108,96,59	7,4,16	296	149	0.000633959	0.0363531	1.0,0.981,0.889	0.886,0.924,0.65	0.137
273	"ENSG00000275895"	"U2AF1L5"	chr21	-	6492130	6492197	6487362	6487412	6493043	6493110	273	283,25,50	12,4,5	16,207,110	8,20,24	216	149	0.00184983	0.0753023	0.942,0.812,0.873	0.58,0.877,0.76	0.137
41945	"ENSG00000164088"	"PPM1M"	chr3	+	52246973	52247228	52246445	52246812	52247681	52247794	41945	82,90,69	0,0,11	78,56,51	3,11,11	298	149	0.00546742	0.153775	1.0,1.0,0.758	0.929,0.718,0.699	0.137
26120	"ENSG00000163710"	"PCOLCE2"	chr3	-	142823531	142823615	142820877	142821045	142829691	142829731	26120	22,27,20	0,2,0	15,11,29	4,2,0	233	149	0.0122509	0.25815	1.0,0.896,1.0	0.706,0.779,1.0	0.137
28530	"ENSG00000178950"	"GAK"	chr4	-	913606	913668	904636	904779	932042	932220	28530	33,47,66	0,0,10	38,57,65	14,8,4	211	149	0.0166201	0.309256	1.0,1.0,0.823	0.657,0.834,0.92	0.137
32823	"ENSG00000204634"	"TBC1D8"	chr2	-	101033543	101033758	101029490	101029776	101036017	101036168	32823	20,26,27	0,0,0	29,30,21	2,6,0	298	149	0.000151438	0.0138234	1.0,1.0,1.0	0.879,0.714,1.0	0.136
19805	"ENSG00000168066"	"SF1"	chr11	-	64765950	64766155	64764605	64765518	64766899	64767079	19805	175,257,197	88,80,75	162,185,190	115,120,127	298	149	0.000162902	0.0143781	0.499,0.616,0.568	0.413,0.435,0.428	0.136
53573	"ENSG00000179477"	"ALOX12B"	chr17	-	8073656	8073757	8073147	8073318	8076656	8076743	53573	1,1,16	0,2,0	5,9,5	0,4,9	250	149	0.0103817	0.233036	1.0,0.23,1.0	1.0,0.573,0.249	0.136
53288	"ENSG00000039560"	"RAI14"	chr5	+	34818796	34818851	34814582	34814669	34821731	34821833	53288	23,6,11	0,0,0	12,21,18	6,0,0	204	149	0.0163795	0.307224	1.0,1.0,1.0	0.594,1.0,1.0	0.135
4	"ENSG00000160310"	"PRMT2"	chr21	+	46661799	46661936	46649574	46649739	46663382	46663554	4	22,82,72	0,0,0	50,62,86	0,7,13	286	149	1.81856e-07	0.000151329	1.0,1.0,1.0	1.0,0.822,0.775	0.134
41854	"ENSG00000175182"	"FAM131A"	chr3	+	184337310	184337371	184335925	184336123	184341723	184341817	41854	27,68,69	0,0,0	44,45,58	9,0,9	210	149	2.10926e-07	0.000167719	1.0,1.0,1.0	0.776,1.0,0.821	0.134
38469	"ENSG00000122678"	"POLM"	chr7	-	44074130	44074530	44073782	44074025	44078739	44078811	38469	33,43,40	0,0,0	46,34,24	0,2,5	298	149	0.00239106	0.0880466	1.0,1.0,1.0	1.0,0.895,0.706	0.133
1028	"ENSG00000100031"	"GGT1"	chr22	+	24609964	24610033	24607953	24608023	24610357	24610531	1028	25,30,19	0,1,2	36,17,20	2,9,1	218	149	0.00328501	0.109547	1.0,0.953,0.867	0.925,0.564,0.932	0.133
16205	"ENSG00000203780"	"FANK1"	chr10	+	125980160	125980338	125896563	125896655	125988550	125988675	16205	2,5,10	1,1,0	13,14,3	2,2,4	298	149	0.00403574	0.126332	0.5,0.714,1.0	0.765,0.778,0.273	0.133
30653	"ENSG00000163812"	"ZDHHC3"	chr3	-	44958587	44958685	44945167	44945292	44959126	44959460	30653	0,6,3	3,10,7	0,0,1	8,1,7	247	149	0.000234865	0.0182226	0.0,0.266,0.205	0.0,0.0,0.079	0.131
3527	"ENSG00000101017"	"CD40"	chr20	+	46123125	46123219	46122609	46122756	46128137	46128224	3527	67,108,148	19,30,34	71,75,102	32,35,49	243	149	0.00120284	0.0564829	0.684,0.688,0.727	0.576,0.568,0.561	0.131
49093	"ENSG00000162976"	"SLC66A3"	chr2	+	11172750	11172824	11171924	11172045	11174967	11175009	49093	10,13,22	17,33,32	9,5,6	30,21,33	223	149	0.00553552	0.154536	0.282,0.208,0.315	0.167,0.137,0.108	0.131
50471	"ENSG00000114098"	"ARMC8"	chr3	+	138188454	138188530	138187266	138187599	138221925	138221997	50471	1,0,4	0,1,1	3,2,0	4,0,1	225	149	0.0126697	0.264034	1.0,0.0,0.726	0.332,1.0,0.0	0.131
10719	"ENSG00000142208"	"AKT1"	chr14	-	104793126	104793210	104792597	104792722	104795483	104795751	10719	61,86,98	34,46,75	95,48,42	56,65,63	233	149	0.0338822	0.481946	0.534,0.545,0.455	0.52,0.321,0.299	0.131
37898	"ENSG00000168137"	"SETD5"	chr3	+	9436849	9436888	9435727	9435906	9440455	9440698	37898	5,6,0	15,18,12	0,1,0	15,24,14	188	149	4.70286e-05	0.00649722	0.209,0.209,0.0	0.0,0.032,0.0	0.129
63824	"ENSG00000146733"	"PSPH"	chr7	-	56033380	56033494	56031928	56032054	56033960	56034103	63824	4,13,3	10,24,18	0,0,4	14,19,17	263	149	0.000283399	0.0203502	0.185,0.235,0.086	0.0,0.0,0.118	0.129
30752	"ENSG00000111247"	"RAD51AP1"	chr12	+	4546308	4546418	4543762	4543904	4548091	4548175	30752	93,8,14	1,0,0	36,29,23	4,1,3	259	149	0.000529305	0.032037	0.982,1.0,1.0	0.838,0.943,0.815	0.129
21917	"ENSG00000089775"	"ZBTB25"	chr14	-	64502900	64503127	64490360	64490540	64503660	64503845	21917	0,9,8	6,11,16	0,3,0	6,13,10	298	149	0.000593972	0.0347848	0.0,0.29,0.2	0.0,0.103,0.0	0.129
20551	"ENSG00000175224"	"ATG13"	chr11	+	46618259	46618375	46617544	46617890	46630044	46630100	20551	18,46,44	18,59,72	15,21,25	35,61,65	265	149	0.0020646	0.0798655	0.36,0.305,0.256	0.194,0.162,0.178	0.129
52126	"ENSG00000221978"	"CCNL2"	chr1	-	1392678	1392803	1390765	1390865	1393395	1393460	52126	35,72,62	18,52,45	30,52,44	30,45,73	274	149	0.0121953	0.258035	0.514,0.43,0.428	0.352,0.386,0.247	0.129
40430	"ENSG00000144283"	"PKP4"	chr2	+	158577270	158577383	158533179	158533316	158603069	158603104	40430	26,37,31	0,0,0	21,30,17	0,0,6	262	149	0.0148195	0.289608	1.0,1.0,1.0	1.0,1.0,0.617	0.128
42407	"ENSG00000160055"	"TMEM234"	chr1	-	32217436	32217577	32217258	32217351	32221130	32221197	42407	8,10,4	13,9,18	4,9,3	15,32,19	290	149	0.0498764	0.613895	0.24,0.363,0.102	0.121,0.126,0.075	0.128
32835	"ENSG00000148950"	"IMMP1L"	chr11	-	31456259	31456386	31452197	31453092	31509518	31509563	32835	5,10,4	0,0,0	4,15,3	0,5,0	276	149	0.0176567	0.322706	1.0,1.0,1.0	1.0,0.618,1.0	0.127
53538	"ENSG00000160326"	"SLC2A6"	chr9	-	133473414	133473600	133473104	133473250	133473979	133474088	53538	29,37,61	1,4,2	23,42,57	7,4,5	298	149	0.0332173	0.476003	0.935,0.822,0.938	0.622,0.84,0.851	0.127
14009	"ENSG00000139436"	"GIT2"	chr12	-	109951166	109951316	109947255	109947504	109953091	109953234	14009	17,33,34	1,1,5	33,43,51	3,13,8	298	149	0.0347741	0.490069	0.895,0.943,0.773	0.846,0.623,0.761	0.127
4956	"ENSG00000141564"	"RPTOR"	chr17	+	80925369	80925480	80908810	80908929	80940495	80940601	4956	29,49,34	1,0,0	25,29,44	4,0,7	260	149	3.9063e-05	0.00570511	0.943,1.0,1.0	0.782,1.0,0.783	0.126
19681	"ENSG00000175294"	"CATSPER1"	chr11	-	66020563	66020627	66020316	66020389	66020810	66020954	19681	49,31,28	30,28,24	19,26,15	29,27,22	213	149	0.0273047	0.422038	0.533,0.436,0.449	0.314,0.402,0.323	0.126
64083	"ENSG00000205763"	"RP9P"	chr7	-	32933813	32933896	32930077	32930108	32942869	32943176	64083	16,0,9	0,1,1	3,1,9	2,2,2	232	149	0.00910718	0.214347	1.0,0.0,0.853	0.491,0.243,0.743	0.125
46021	"ENSG00000134452"	"FBH1"	chr10	+	5924750	5924801	5924310	5924508	5925366	5925492	46021	9,13,5	22,35,47	0,5,6	26,40,63	200	149	0.00192475	0.0771714	0.234,0.217,0.073	0.0,0.085,0.066	0.124
20593	"ENSG00000110497"	"AMBRA1"	chr11	-	46508190	46508370	46494123	46494204	46541944	46542981	20593	36,48,52	0,0,4	28,31,64	2,5,5	298	149	0.00590471	0.161902	1.0,1.0,0.867	0.875,0.756,0.865	0.124
981	"ENSG00000183765"	"CHEK2"	chr22	-	28696900	28696987	28695709	28695873	28699837	28699937	981	50,76,47	5,6,7	78,94,34	18,10,14	236	149	0.0267898	0.417858	0.863,0.889,0.809	0.732,0.856,0.605	0.123
458	"ENSG00000100207"	"TCF20"	chr22	-	42168608	42168736	42160012	42161358	42169846	42169896	458	3,7,6	14,7,13	2,5,2	8,19,25	277	149	0.0326882	0.472014	0.103,0.35,0.199	0.119,0.124,0.041	0.123
71589	"ENSG00000152939"	"MARVELD2"	chr5	+	69424600	69424636	69418946	69420531	69432526	69432675	71589	7,13,21	3,0,0	7,15,15	2,3,4	185	149	0.0094479	0.219665	0.653,1.0,1.0	0.738,0.801,0.751	0.121
13212	"ENSG00000102710"	"SUPT20H"	chr13	-	37010551	37010655	37009311	37009809	37012191	37012297	13212	2,6,15	6,9,13	4,7,5	35,10,19	253	149	0.0205296	0.354361	0.164,0.282,0.405	0.063,0.292,0.134	0.121
22375	"ENSG00000136861"	"CDK5RAP2"	chr9	-	120407011	120407248	120404035	120404113	120408346	120408468	22375	26,29,11	0,0,0	31,19,33	1,0,7	298	149	0.000297075	0.0209664	1.0,1.0,1.0	0.939,1.0,0.702	0.12
6920	"ENSG00000183018"	"SPNS2"	chr17	+	4536262	4536426	4536075	4536174	4536899	4536946	6920	15,28,47	0,0,0	33,32,39	6,0,2	298	149	0.000421228	0.0267241	1.0,1.0,1.0	0.733,1.0,0.907	0.12
15056	"ENSG00000135503"	"ACVR1B"	chr12	+	51980968	51981199	51976326	51976575	51991862	51991993	15056	20,35,28	0,0,0	27,25,51	0,5,2	298	149	0.0027838	0.0978488	1.0,1.0,1.0	1.0,0.714,0.927	0.12
56419	"ENSG00000196476"	"C20orf96"	chr20	-	289558	289676	283962	284081	290258	290307	56419	75,93,56	60,31,25	91,71,37	65,61,31	267	149	0.0498257	0.613591	0.411,0.626,0.556	0.439,0.394,0.4	0.12
23296	"ENSG00000173264"	"GPR137"	chr11	+	64288602	64288721	64288339	64288468	64289036	64289494	23296	135,96,142	0,1,1	124,122,123	10,15,6	268	149	1.8905e-09	4.50973e-06	1.0,0.982,0.987	0.873,0.819,0.919	0.119
33759	"ENSG00000070882"	"OSBPL3"	chr7	-	24849068	24849176	24842278	24842413	24852503	24852634	33759	42,40,50	1,0,0	39,41,31	2,11,0	257	149	3.71238e-05	0.00553485	0.961,1.0,1.0	0.919,0.684,1.0	0.119
43937	"ENSG00000176720"	"BOK"	chr2	+	241562347	241562476	241558744	241558993	241570124	241570288	43937	194,122,84	18,0,7	127,126,110	12,26,16	278	149	0.00123628	0.0575996	0.852,1.0,0.865	0.85,0.722,0.787	0.119
21392	"ENSG00000110713"	"NUP98"	chr11	-	3744508	3744649	3735190	3735324	3753315	3753408	21392	62,85,71	0,5,1	45,51,69	11,0,7	290	149	0.00344675	0.112941	1.0,0.897,0.973	0.678,1.0,0.835	0.119
11259	"ENSG00000088367"	"EPB41L1"	chr20	+	36173763	36173954	36154739	36154896	36175550	36175715	11259	22,36,34	4,0,3	37,40,44	10,2,11	298	149	0.0386178	0.524013	0.733,1.0,0.85	0.649,0.909,0.667	0.119
37476	"ENSG00000052723"	"SIKE1"	chr1	-	114776345	114776459	114769478	114774372	114779141	114779284	37476	31,8,36	0,0,0	20,40,38	1,4,3	263	149	0.000386235	0.0251735	1.0,1.0,1.0	0.919,0.85,0.878	0.118
34193	"ENSG00000065526"	"SPEN"	chr1	+	15938717	15938876	15937811	15938006	15939295	15940456	34193	40,25,39	0,0,0	22,15,38	6,0,0	298	149	0.0129503	0.267389	1.0,1.0,1.0	0.647,1.0,1.0	0.118
28948	"ENSG00000140876"	"NUDT7"	chr16	+	77735393	77735507	77725430	77725584	77735827	77736249	28948	0,8,0	4,6,10	0,2,0	7,14,10	263	149	0.0209284	0.359165	0.0,0.43,0.0	0.0,0.075,0.0	0.118
19784	"ENSG00000168061"	"SAC3D1"	chr11	+	65041285	65041866	65040900	65041106	65044224	65044799	19784	102,75,65	0,0,0	89,58,58	3,10,1	298	149	3.59805e-06	0.00109106	1.0,1.0,1.0	0.937,0.744,0.967	0.117
64739	"ENSG00000164808"	"SPIDR"	chr8	+	47727199	47727293	47713488	47713641	47735306	47735916	64739	26,15,4	1,0,1	7,8,10	3,2,0	243	149	0.0153606	0.295501	0.941,1.0,0.71	0.589,0.71,1.0	0.117
52497	"ENSG00000159733"	"ZFYVE28"	chr4	-	2335704	2335794	2328533	2329142	2337406	2337496	52497	14,21,39	0,0,0	12,18,30	0,3,3	239	149	0.00664692	0.175011	1.0,1.0,1.0	1.0,0.789,0.862	0.116
10703	"ENSG00000184916"	"JAG2"	chr14	-	105150990	105151104	105150864	105150911	105151282	105151396	10703	51,78,42	15,21,11	63,80,63	34,23,36	263	149	0.0435944	0.566616	0.658,0.678,0.684	0.512,0.663,0.498	0.116
37530	"ENSG00000081760"	"AACS"	chr12	+	125136661	125136864	125134793	125134852	125142091	125142177	37530	53,91,78	0,0,0	54,69,89	6,1,7	298	149	3.03565e-06	0.000949418	1.0,1.0,1.0	0.818,0.972,0.864	0.115
30513	"ENSG00000077782"	"FGFR1"	chr8	-	38429246	38429390	38428345	38428435	38457355	38457446	30513	7,5,0	10,29,44	0,0,0	20,24,44	293	149	0.000240717	0.018444	0.263,0.081,0.0	0.0,0.0,0.0	0.115
21627	"ENSG00000185101"	"ANO9"	chr11	-	420462	420615	419581	419729	420717	420860	21627	12,35,47	0,0,0	16,21,35	1,1,3	298	149	0.0104787	0.23388	1.0,1.0,1.0	0.889,0.913,0.854	0.115
17707	"ENSG00000278558"	"TMEM191B"	chr22	+	18530155	18530196	18529935	18530008	18530254	18530459	17707	2,17,18	0,0,3	15,17,15	7,1,1	190	149	0.018032	0.327855	1.0,1.0,0.825	0.627,0.93,0.922	0.115
4310	"ENSG00000265681"	"RPL17"	chr18	-	49491735	49491833	49491531	49491584	49492257	49492409	4310	163,96,130	71,68,90	124,82,102	69,112,122	247	149	0.0330624	0.474925	0.581,0.46,0.466	0.52,0.306,0.335	0.115
29165	"ENSG00000144554"	"FANCD2"	chr3	+	10072870	10072981	10067208	10067317	10073252	10073362	29165	25,19,4	0,0,0	17,31,12	4,1,0	260	149	0.0482908	0.60086	1.0,1.0,1.0	0.709,0.947,1.0	0.115
21286	"ENSG00000132256"	"TRIM5"	chr11	-	5665980	5666081	5663616	5665682	5667688	5667711	21286	33,34,30	0,0,2	30,21,30	6,3,0	250	149	0.00090459	0.0464281	1.0,1.0,0.899	0.749,0.807,1.0	0.114
29943	"ENSG00000049167"	"ERCC8"	chr5	-	60909647	60909957	60904791	60904873	60918264	60918388	29943	1,5,3	27,8,16	0,0,0	18,19,18	298	149	0.00143436	0.0643162	0.018,0.238,0.086	0.0,0.0,0.0	0.114
37512	"ENSG00000251322"	"SHANK3"	chr22	+	50697563	50697715	50694774	50695048	50698689	50698803	37512	25,40,46	0,0,0	14,58,36	1,0,5	298	149	0.0182394	0.329785	1.0,1.0,1.0	0.875,1.0,0.783	0.114
9539	"ENSG00000140400"	"MAN2C1"	chr15	-	75362641	75362748	75362342	75362453	75364487	75364665	9539	29,16,26	0,0,1	19,17,16	3,1,1	256	149	0.0223365	0.372608	1.0,1.0,0.938	0.787,0.908,0.903	0.113
37507	"ENSG00000143393"	"PI4KB"	chr1	-	151326171	151326373	151315572	151316509	151327270	151327416	37507	32,105,87	12,42,55	51,42,62	34,31,47	298	149	0.048417	0.601547	0.571,0.556,0.442	0.429,0.404,0.397	0.113
24816	"ENSG00000171017"	"LRRC8E"	chr19	+	7893716	7893859	7888504	7888600	7895598	7895741	24816	2,7,0	6,15,13	0,0,0	8,11,18	292	149	0.000347073	0.0232718	0.145,0.192,0.0	0.0,0.0,0.0	0.112
61398	"ENSG00000196498"	"NCOR2"	chr12	-	124340601	124340694	124340293	124340443	124341822	124342055	61398	38,40,51	0,0,3	40,43,24	0,3,7	242	149	0.00339785	0.112228	1.0,1.0,0.913	1.0,0.898,0.679	0.112
40784	"ENSG00000178821"	"TMEM52"	chr1	-	1918892	1918934	1918252	1918431	1919044	1919088	40784	23,15,9	3,1,0	21,15,10	7,2,1	191	149	0.0380896	0.518428	0.857,0.921,1.0	0.701,0.854,0.886	0.112
30124	"ENSG00000112851"	"ERBIN"	chr5	+	66075023	66075230	66053405	66054951	66076315	66076408	30124	29,19,11	0,0,0	26,28,8	0,7,0	298	149	0.00190697	0.0768414	1.0,1.0,1.0	1.0,0.667,1.0	0.111
41915	"ENSG00000138758"	"SEPTIN11"	chr4	+	76995780	76995938	76949861	76949930	76996424	76996539	41915	0,3,5	16,10,6	0,3,0	18,15,2	298	149	0.01853	0.332017	0.0,0.13,0.294	0.0,0.091,0.0	0.111
19492	"ENSG00000110066"	"KMT5B"	chr11	-	68189916	68190152	68185780	68185928	68213476	68213595	19492	31,25,36	0,0,0	23,25,12	4,1,0	298	149	0.0364201	0.503022	1.0,1.0,1.0	0.742,0.926,1.0	0.111
44236	"ENSG00000051382"	"PIK3CB"	chr3	-	138796462	138796567	138759172	138759359	138834694	138834833	44236	14,14,14	0,0,0	17,15,7	5,0,0	254	149	0.0385473	0.523454	1.0,1.0,1.0	0.666,1.0,1.0	0.111
12563	"ENSG00000101019"	"UQCC1"	chr20	-	35381917	35382025	35374183	35374256	35394091	35394196	12563	29,34,33	0,0,0	36,34,42	4,4,0	257	149	0.000858372	0.0449697	1.0,1.0,1.0	0.839,0.831,1.0	0.11
14834	"ENSG00000135447"	"PPP1R1A"	chr12	-	54581975	54582131	54580943	54581050	54583210	54583248	14834	34,25,11	0,0,2	23,20,21	3,3,2	298	149	0.00192472	0.0771714	1.0,1.0,0.733	0.793,0.769,0.84	0.11
64196	"ENSG00000181577"	"C6orf223"	chr6	+	44001016	44001143	44000584	44000700	44002052	44002127	64196	107,182,147	0,0,12	261,134,81	0,16,17	276	149	0.00666222	0.175275	1.0,1.0,0.869	1.0,0.819,0.72	0.11
33987	"ENSG00000166889"	"PATL1"	chr11	-	59655955	59656045	59655522	59655740	59656498	59656600	33987	48,92,53	1,1,0	32,53,39	1,5,6	239	149	3.44203e-05	0.00529657	0.968,0.983,1.0	0.952,0.869,0.802	0.109
50486	"ENSG00000127511"	"SIN3B"	chr19	+	16862883	16862979	16862351	16862559	16863679	16863796	50486	14,30,31	28,53,91	10,14,12	48,53,80	245	149	0.000706557	0.0392578	0.233,0.256,0.172	0.112,0.138,0.084	0.109
18446	"ENSG00000137700"	"SLC37A4"	chr11	-	119028734	119028834	119028193	119028426	119029391	119029564	18446	3,4,2	19,15,6	1,2,0	36,25,10	249	149	0.00204812	0.0794857	0.086,0.138,0.166	0.016,0.046,0.0	0.109
11832	"ENSG00000258790"	"AL121594"	chr14	+	35126734	35126782	35122951	35124231	35127478	35127611	11832	37,4,5	0,0,0	19,20,14	7,0,0	197	149	0.00389923	0.123253	1.0,1.0,1.0	0.672,1.0,1.0	0.109
26036	"ENSG00000131373"	"HACL1"	chr3	-	15574976	15575082	15573158	15573242	15579909	15580045	26036	38,54,64	0,0,0	44,21,31	0,6,0	255	149	0.0267717	0.417858	1.0,1.0,1.0	1.0,0.672,1.0	0.109
13434	"ENSG00000186866"	"POFUT2"	chr21	-	45266021	45266227	45263927	45265635	45267589	45267713	13434	8,10,11	15,55,79	1,2,2	49,64,86	298	149	2.26303e-07	0.000176035	0.211,0.083,0.065	0.01,0.015,0.011	0.108
24632	"ENSG00000188313"	"PLSCR1"	chr3	-	146536539	146536565	146533469	146533550	146544466	146544530	24632	125,129,185	14,6,0	154,82,103	29,10,20	175	149	4.85053e-07	0.00027119	0.884,0.948,1.0	0.819,0.875,0.814	0.108
66309	"ENSG00000155755"	"TMEM237"	chr2	-	201627320	201627414	201626025	201626147	201628075	201628149	66309	27,20,20	2,0,0	24,35,15	4,6,0	243	149	0.000829817	0.0439889	0.892,1.0,1.0	0.786,0.782,1.0	0.108
51721	"ENSG00000095321"	"CRAT"	chr9	-	129109178	129109277	129107813	129108077	129110482	129110769	51721	38,65,45	44,46,50	52,41,31	74,58,61	248	149	0.0132722	0.27122	0.342,0.459,0.351	0.297,0.298,0.234	0.108
12804	"ENSG00000136100"	"VPS36"	chr13	-	52417056	52417141	52416016	52416093	52423573	52423639	12804	12,8,10	1,0,0	5,10,9	0,5,0	234	149	0.033728	0.48018	0.884,1.0,1.0	1.0,0.56,1.0	0.108
52955	"ENSG00000120318"	"ARAP3"	chr5	-	141655361	141655400	141653400	141654435	141655620	141655758	52955	24,42,41	0,0,0	24,45,34	5,3,1	188	149	0.000418152	0.0266208	1.0,1.0,1.0	0.792,0.922,0.964	0.107
58062	"ENSG00000183111"	"ARHGEF37"	chr5	+	149621732	149622062	149620353	149620464	149624011	149624140	58062	1,16,8	0,0,1	4,14,13	0,0,7	298	149	0.00775753	0.19226	1.0,1.0,0.8	1.0,1.0,0.481	0.106
6292	"ENSG00000171903"	"CYP4F11"	chr19	-	15927429	15927483	15927211	15927339	15929456	15929601	6292	49,107,141	12,13,35	78,48,57	28,22,14	203	149	0.0232353	0.382432	0.75,0.858,0.747	0.672,0.616,0.749	0.106
28927	"ENSG00000167110"	"GOLGA2"	chr9	-	128272784	128272865	128268419	128268524	128273849	128273972	28927	12,22,45	33,127,113	15,4,10	70,136,148	230	149	4.06137e-07	0.000242206	0.191,0.101,0.205	0.122,0.019,0.042	0.105
64340	"ENSG00000106603"	"COA1"	chr7	-	43650611	43650712	43647227	43648652	43665657	43665722	64340	16,22,19	3,0,0	9,31,25	0,8,5	250	149	0.00329572	0.109802	0.761,1.0,1.0	1.0,0.698,0.749	0.105
11779	"ENSG00000182400"	"TRAPPC6B"	chr14	-	39154210	39154294	39151745	39151839	39158284	39158402	11779	10,9,4	2,0,0	4,15,11	0,1,6	233	149	0.00369578	0.118391	0.762,1.0,1.0	1.0,0.906,0.54	0.105
34474	"ENSG00000123453"	"SARDH"	chr9	-	133733842	133734203	133732422	133732601	133738253	133738352	34474	23,19,21	0,0,0	29,27,33	2,0,4	298	149	0.00926548	0.216691	1.0,1.0,1.0	0.879,1.0,0.805	0.105
39472	"ENSG00000205758"	"CRYZL1"	chr21	-	33624682	33624760	33621995	33622068	33631485	33631527	39472	16,5,25	0,0,0	12,12,24	0,1,4	227	149	0.0422969	0.555401	1.0,1.0,1.0	1.0,0.887,0.798	0.105
21429	"ENSG00000021762"	"OSBPL5"	chr11	-	3120543	3120624	3119546	3119631	3121996	3122098	21429	58,63,90	0,1,2	84,53,56	0,9,7	230	149	9.67245e-05	0.0105198	1.0,0.976,0.967	1.0,0.792,0.838	0.104
20529	"ENSG00000183426"	"NPIPA1"	chr16	+	14950751	14950821	14950219	14950255	14951614	14952060	20529	0,8,0	11,12,1	0,0,0	13,1,12	219	149	0.00108717	0.052697	0.0,0.312,0.0	0.0,0.0,0.0	0.104
1553	"ENSG00000074219"	"TEAD2"	chr19	-	49355302	49355419	49355147	49355206	49357251	49357255	1553	89,96,141	7,18,14	98,113,109	22,30,18	266	149	0.0110382	0.241571	0.877,0.749,0.849	0.714,0.678,0.772	0.104
41537	"ENSG00000121310"	"ECHDC2"	chr1	-	52897436	52897484	52895909	52896597	52899173	52899224	41537	35,75,66	6,11,11	52,68,61	13,21,20	197	149	0.0134797	0.27452	0.815,0.838,0.819	0.752,0.71,0.698	0.104
60148	"ENSG00000288473"	"AL669830"	chr6	+	30925273	30925385	30924353	30924560	30925543	30925719	60148	71,62,84	0,1,6	75,57,20	3,7,3	261	149	0.0239101	0.388579	1.0,0.973,0.889	0.935,0.823,0.792	0.104
9389	"ENSG00000255769"	"GOLGA2P10"	chr15	-	82477837	82477926	82477393	82477582	82513715	82513844	9389	35,26,45	0,0,0	45,32,27	2,2,3	238	149	0.00340321	0.112234	1.0,1.0,1.0	0.934,0.909,0.849	0.103
12676	"ENSG00000005812"	"FBXL3"	chr13	-	77021512	77021861	77018599	77018722	77026826	77027159	12676	8,7,10	0,0,2	16,25,11	0,1,6	298	149	0.00886435	0.210894	1.0,1.0,0.714	1.0,0.926,0.478	0.103
63155	"ENSG00000198561"	"CTNND1"	chr11	+	57789036	57789155	57761796	57762046	57791384	57791673	63155	3,3,1	2,3,4	3,0,0	1,7,6	268	149	0.0314895	0.461218	0.455,0.357,0.122	0.625,0.0,0.0	0.103
25253	"ENSG00000163964"	"PIGX"	chr3	+	196726654	196726771	196722414	196722556	196727922	196728037	25253	4,13,7	32,22,45	2,3,0	24,37,27	266	149	0.000324869	0.0223119	0.065,0.249,0.08	0.045,0.043,0.0	0.102
27198	"ENSG00000080822"	"CLDND1"	chr3	-	98516799	98516879	98515483	98515832	98517051	98517160	27198	62,54,63	6,0,0	98,84,57	11,17,2	229	149	0.000556092	0.0331083	0.871,1.0,1.0	0.853,0.763,0.949	0.102
17785	"ENSG00000066084"	"DIP2B"	chr12	+	50671185	50671398	50660193	50660319	50674473	50674629	17785	26,38,30	2,1,0	19,30,17	2,4,1	298	149	0.0150083	0.291705	0.867,0.95,1.0	0.826,0.789,0.895	0.102
11236	"ENSG00000063761"	"ADCK1"	chr14	+	77907802	77907919	77899099	77899258	77924456	77924575	11236	34,63,78	0,0,0	57,94,56	1,10,4	266	149	3.67833e-06	0.00109682	1.0,1.0,1.0	0.97,0.84,0.887	0.101
53265	"ENSG00000164576"	"SAP30L"	chr5	+	154452455	154452495	154451090	154451213	154453401	154453500	53265	1,7,4	8,26,30	0,3,0	6,40,54	189	149	0.000245559	0.0185364	0.09,0.175,0.095	0.0,0.056,0.0	0.101
65021	"ENSG00000189077"	"TMEM120A"	chr7	-	75987537	75987602	75986982	75987428	75987717	75987810	65021	247,285,344	85,46,86	260,242,251	103,96,98	214	149	0.00247409	0.089694	0.669,0.812,0.736	0.637,0.637,0.641	0.101
63261	"ENSG00000164818"	"DNAAF5"	chr7	+	779952	780144	775005	775162	785516	786031	63261	164,284,159	11,7,24	239,185,182	22,43,27	298	149	0.00295934	0.102113	0.882,0.953,0.768	0.845,0.683,0.771	0.101
15080	"ENSG00000110911"	"SLC11A2"	chr12	-	51005652	51005677	51005310	51005436	51008475	51008624	15080	0,0,0	9,24,9	0,1,6	13,18,15	174	149	0.00489993	0.14266	0.0,0.0,0.0	0.0,0.045,0.255	-0.1
54828	"ENSG00000243708"	"PLA2G4B"	chr15	+	41844847	41845070	41844470	41844607	41845202	41845320	54828	6,11,6	0,6,0	10,14,1	0,2,0	298	149	0.0322904	0.468348	1.0,0.478,1.0	1.0,0.778,1.0	-0.1
40218	"ENSG00000177359"	"AC024940"	chr12	-	31117419	31117480	31116356	31116469	31118962	31119110	40218	38,36,33	8,2,0	21,30,16	0,0,0	210	149	0.000135138	0.0128946	0.771,0.927,1.0	1.0,1.0,1.0	-0.101
14522	"ENSG00000111605"	"CPSF6"	chr12	+	69258034	69258145	69257731	69257905	69258589	69259094	14522	8,16,13	51,57,75	22,21,31	62,66,43	260	149	0.00202634	0.079183	0.082,0.139,0.09	0.169,0.154,0.292	-0.101
2447	"ENSG00000130517"	"PGPEP1"	chr19	+	18357382	18357615	18355894	18356011	18363390	18363998	2447	86,186,216	14,23,28	131,146,190	3,13,17	298	149	0.00565972	0.157233	0.754,0.802,0.794	0.956,0.849,0.848	-0.101
36329	"ENSG00000138674"	"SEC31A"	chr4	-	82842184	82842481	82828999	82829058	82844385	82844509	36329	52,107,90	8,18,10	70,77,78	3,6,7	298	149	0.015212	0.294066	0.765,0.748,0.818	0.921,0.865,0.848	-0.101
44397	"ENSG00000073921"	"PICALM"	chr11	-	85978069	85978093	85976622	85976682	85981128	85981228	44397	67,67,96	16,6,15	79,82,92	4,6,2	173	149	0.000125291	0.0121166	0.783,0.906,0.846	0.944,0.922,0.975	-0.102
15990	"ENSG00000011105"	"TSPAN9"	chr12	+	3201176	3201256	3083652	3083719	3278420	3278612	15990	23,50,63	3,1,5	29,48,53	0,0,0	229	149	0.000630181	0.0362633	0.833,0.97,0.891	1.0,1.0,1.0	-0.102
7004	"ENSG00000040531"	"CTNS"	chr17	+	3647443	3647522	3640146	3640267	3654997	3655101	7004	5,14,15	1,2,4	7,17,17	3,0,0	228	149	0.0285766	0.43586	0.766,0.821,0.71	0.604,1.0,1.0	-0.102
9358	"ENSG00000169609"	"C15orf40"	chr15	-	82989105	82989157	82988440	82988828	82991931	82992046	9358	0,2,1	3,6,9	1,3,4	5,10,8	201	149	0.0345194	0.488017	0.0,0.198,0.076	0.129,0.182,0.27	-0.102
71768	"ENSG00000120837"	"NFYB"	chr12	-	104131753	104131838	104128423	104128517	104135447	104135532	71768	5,1,1	84,13,5	7,11,5	30,32,13	234	149	0.000156697	0.0141232	0.037,0.047,0.113	0.129,0.18,0.197	-0.103
13481	"ENSG00000168411"	"RFWD3"	chr16	-	74630780	74630957	74628451	74628666	74632522	74632673	13481	45,86,46	9,4,0	75,60,54	0,2,0	298	149	0.000167288	0.0145839	0.714,0.915,1.0	1.0,0.938,1.0	-0.103
15631	"ENSG00000008394"	"MGST1"	chr12	+	16354230	16354270	16347644	16347710	16357604	16357699	15631	7,15,8	3,8,4	7,1,9	1,1,1	189	149	0.0103544	0.232728	0.648,0.596,0.612	0.847,0.441,0.876	-0.103
26389	"ENSG00000102984"	"ZNF821"	chr16	-	71861775	71861942	71859679	71860672	71864137	71864242	26389	11,25,33	1,4,3	31,40,17	0,1,2	298	149	0.00780589	0.193161	0.846,0.758,0.846	1.0,0.952,0.81	-0.104
2526	"ENSG00000105393"	"BABAM1"	chr19	+	17273903	17274024	17268793	17269091	17276494	17276555	2526	4,3,5	1,1,1	3,8,1	0,0,1	270	149	0.0220097	0.369743	0.688,0.623,0.734	1.0,1.0,0.356	-0.104
13926	"ENSG00000111271"	"ACAD10"	chr12	+	111746143	111746284	111744570	111745043	111747048	111747186	13926	38,72,53	0,1,11	44,40,51	0,0,0	290	149	7.61834e-05	0.00908665	1.0,0.974,0.712	1.0,1.0,1.0	-0.105
11727	"ENSG00000165501"	"LRR1"	chr14	+	49603551	49603618	49602369	49602468	49614255	49614671	11727	2,2,0	32,32,34	14,3,4	42,43,14	216	149	0.000100079	0.0106897	0.041,0.041,0.0	0.187,0.046,0.165	-0.105
23859	"ENSG00000128513"	"POT1"	chr7	-	124829253	124829342	124827200	124827305	124835278	124835414	23859	24,5,10	3,2,0	10,5,1	0,1,0	238	149	0.0396134	0.530481	0.834,0.61,1.0	1.0,0.758,1.0	-0.105
55854	"ENSG00000197150"	"ABCB8"	chr7	+	151033442	151033604	151028449	151028610	151034272	151034428	55854	0,0,1	29,43,15	15,5,1	42,12,18	298	149	2.43916e-07	0.000181829	0.0,0.0,0.032	0.152,0.172,0.027	-0.106
31395	"ENSG00000069424"	"KCNAB2"	chr1	+	6018634	6018835	5992665	5992788	6040516	6040645	31395	5,4,5	19,35,30	18,12,3	26,18,24	298	149	0.00520584	0.148663	0.116,0.054,0.077	0.257,0.25,0.059	-0.106
32444	"ENSG00000183250"	"LINC01547"	chr21	-	44937538	44937682	44935626	44935890	44939592	44939845	32444	0,2,0	16,12,4	0,9,0	20,7,3	293	149	0.014446	0.285599	0.0,0.078,0.0	0.0,0.395,0.0	-0.106
57100	"ENSG00000213024"	"NUP62"	chr19	-	49927693	49927815	49906824	49909884	49929349	49929763	57100	51,84,44	5,12,6	80,73,84	0,2,11	271	149	0.0149063	0.290669	0.849,0.794,0.801	1.0,0.953,0.808	-0.106
59959	"ENSG00000006432"	"MAP3K9"	chr14	-	70733756	70733798	70732538	70733342	70734385	70734498	59959	0,0,0	4,15,15	0,1,5	14,10,12	191	149	0.0163629	0.307224	0.0,0.0,0.0	0.0,0.072,0.245	-0.106
22553	"ENSG00000160216"	"AGPAT3"	chr21	+	43960631	43960779	43959782	43959859	43967945	43968115	22553	2,2,7	15,42,16	10,8,17	20,22,28	297	149	0.000920194	0.04672	0.063,0.023,0.18	0.201,0.154,0.233	-0.107
34736	"ENSG00000108469"	"RECQL5"	chr17	-	75665050	75665091	75662478	75662997	75666427	75666571	34736	9,23,21	0,1,6	31,17,19	0,0,0	190	149	0.00196113	0.07797	1.0,0.947,0.733	1.0,1.0,1.0	-0.107
27873	"ENSG00000161010"	"MRNIP"	chr5	-	179853196	179853276	179847977	179848066	179853377	179853437	27873	2,1,2	18,25,14	12,4,6	34,9,41	229	149	0.00441054	0.134313	0.067,0.025,0.085	0.187,0.224,0.087	-0.107
47	"ENSG00000160226"	"CFAP410"	chr21	-	44335757	44335804	44333032	44333262	44337648	44337667	47	55,36,50	4,13,5	83,49,35	6,5,0	196	149	0.029739	0.445279	0.913,0.678,0.884	0.913,0.882,1.0	-0.107
62078	"ENSG00000111832"	"RWDD1"	chr6	+	116574057	116574171	116571488	116571655	116580294	116580360	62078	9,24,9	54,31,18	36,20,18	29,38,25	263	149	0.0360221	0.499682	0.086,0.305,0.221	0.413,0.23,0.29	-0.107
67705	"ENSG00000049769"	"PPP1R3F"	chrX	+	49285833	49287727	49281980	49282063	49299275	49299435	67705	0,0,1	6,6,6	0,4,3	6,8,6	298	149	0.00314103	0.106231	0.0,0.0,0.077	0.0,0.2,0.2	-0.108
12800	"ENSG00000136108"	"CKAP2"	chr13	+	52460895	52460974	52456522	52456607	52461057	52461258	12800	21,17,17	0,6,0	55,28,19	1,0,0	228	149	0.0154077	0.29609	1.0,0.649,1.0	0.973,1.0,1.0	-0.108
69556	"ENSG00000205643"	"CDPF1"	chr22	-	46248171	46248284	46247109	46247221	46250255	46250289	69556	25,17,24	0,4,6	11,14,19	0,3,0	262	149	0.0187089	0.333827	1.0,0.707,0.695	1.0,0.726,1.0	-0.108
70923	"ENSG00000106333"	"PCOLCE"	chr7	+	100605504	100605812	100605152	100605215	100606415	100606630	70923	37,29,26	3,2,2	55,28,5	2,0,0	298	149	0.00540989	0.152904	0.86,0.879,0.867	0.932,1.0,1.0	-0.109
5199	"ENSG00000138867"	"GUCD1"	chr22	-	24548916	24549001	24547715	24548073	24555614	24555935	5199	37,58,69	0,9,8	56,60,76	0,0,1	234	149	1.33966e-06	0.000584582	1.0,0.804,0.846	1.0,1.0,0.98	-0.11
51408	"ENSG00000168958"	"MFF"	chr2	+	227328677	227328789	227325150	227325427	227330625	227330846	51408	82,117,108	5,18,8	92,130,71	0,2,3	261	149	2.5267e-06	0.000848526	0.903,0.788,0.885	1.0,0.974,0.931	-0.11
51473	"ENSG00000182240"	"BACE2"	chr21	+	41226265	41226354	41167800	41168575	41275370	41275381	51473	17,20,31	2,0,4	28,44,25	0,0,0	238	149	0.0100532	0.228195	0.842,1.0,0.829	1.0,1.0,1.0	-0.11
34863	"ENSG00000070476"	"ZXDC"	chr3	-	126459652	126459737	126439631	126439727	126461534	126462220	34863	17,18,26	0,4,7	20,22,25	0,1,3	234	149	0.0251688	0.402371	1.0,0.741,0.703	1.0,0.933,0.841	-0.11
18782	"ENSG00000182359"	"KBTBD3"	chr11	-	106076506	106076707	106058864	106059109	106077311	106077347	18782	40,23,15	10,0,0	20,20,22	0,0,0	298	149	0.000119833	0.0118449	0.667,1.0,1.0	1.0,1.0,1.0	-0.111
18011	"ENSG00000151657"	"KIN"	chr10	-	7783080	7783175	7780263	7780307	7787819	7787993	18011	19,21,25	0,2,5	18,31,17	0,1,0	244	149	0.00185366	0.0753722	1.0,0.865,0.753	1.0,0.95,1.0	-0.111
28223	"ENSG00000225697"	"SLC26A6"	chr3	-	48632244	48632396	48632018	48632092	48632973	48633084	28223	35,37,60	0,7,8	46,29,49	3,0,1	298	149	0.00545748	0.153775	1.0,0.725,0.789	0.885,1.0,0.961	-0.111
65321	"ENSG00000004864"	"SLC25A13"	chr7	-	96296897	96296951	96277195	96277338	96321941	96322098	65321	7,17,14	0,4,1	1,6,21	0,0,0	203	149	0.0352209	0.493251	1.0,0.757,0.911	1.0,1.0,1.0	-0.111
49175	"ENSG00000197712"	"FAM114A1"	chr4	+	38868397	38868546	38867805	38867834	38878070	38878426	49175	4,0,1	0,13,8	8,12,3	7,4,2	298	149	0.0380903	0.518428	1.0,0.0,0.059	0.364,0.6,0.429	-0.111
6638	"ENSG00000065559"	"MAP2K4"	chr17	+	12081355	12081530	12054888	12054991	12095574	12095694	6638	32,19,13	3,2,0	33,14,19	0,0,0	298	149	0.0400133	0.534636	0.842,0.826,1.0	1.0,1.0,1.0	-0.111
57552	"ENSG00000149328"	"GLB1L2"	chr11	+	134344386	134344455	134331873	134332147	134345033	134345129	57552	44,44,42	2,9,6	83,60,51	3,0,3	218	149	0.000874275	0.0453381	0.938,0.77,0.827	0.95,1.0,0.921	-0.112
14201	"ENSG00000166130"	"IKBIP"	chr12	-	98634295	98634413	98624248	98626766	98644522	98644788	14201	13,7,21	5,0,1	10,14,12	1,0,0	267	149	0.00463417	0.138308	0.592,1.0,0.921	0.848,1.0,1.0	-0.112
54272	"ENSG00000174446"	"SNAPC5"	chr15	-	66495329	66495419	66493467	66494552	66497641	66497750	54272	42,43,34	6,12,4	64,90,46	0,6,8	239	149	0.0149338	0.290888	0.814,0.691,0.841	1.0,0.903,0.782	-0.113
38342	"ENSG00000100416"	"TRMU"	chr22	+	46355989	46356072	46353516	46355588	46356841	46356979	38342	52,63,80	10,1,5	57,93,149	0,0,0	232	149	4.01396e-07	0.000242206	0.77,0.976,0.911	1.0,1.0,1.0	-0.114
19178	"ENSG00000161091"	"MFSD12"	chr19	-	3546073	3546168	3538260	3538756	3547271	3547364	19178	18,41,93	1,8,3	49,49,102	0,1,0	244	149	2.7727e-05	0.00456988	0.917,0.758,0.95	1.0,0.968,1.0	-0.114
1093	"ENSG00000183597"	"TANGO2"	chr22	+	20019180	20019299	20017030	20017192	20036759	20036854	1093	0,0,1	7,1,4	1,6,0	8,5,6	268	149	0.00666672	0.175275	0.0,0.0,0.122	0.065,0.4,0.0	-0.114
53873	"ENSG00000155975"	"VPS37A"	chr8	+	17265906	17265981	17246933	17247369	17268257	17268273	53873	20,20,34	2,2,2	15,42,34	0,0,0	224	149	0.0120445	0.255942	0.869,0.869,0.919	1.0,1.0,1.0	-0.114
23596	"ENSG00000067365"	"METTL22"	chr16	+	8635038	8635079	8628729	8629110	8635167	8635282	23596	63,123,193	13,27,6	68,136,151	5,2,2	190	149	2.71616e-06	0.000883541	0.792,0.781,0.962	0.914,0.982,0.983	-0.115
56244	"ENSG00000085365"	"SCAMP1"	chr5	+	78449932	78450034	78421800	78421960	78459244	78459362	56244	30,18,11	7,2,0	32,29,9	2,0,0	251	149	0.000833112	0.0440983	0.718,0.842,1.0	0.905,1.0,1.0	-0.115
47332	"ENSG00000263072"	"ZNF213-AS1"	chr16	-	3132849	3132945	3131746	3132103	3134629	3134873	47332	0,1,1	2,4,3	4,0,3	4,3,5	245	149	0.00736515	0.186247	0.0,0.132,0.169	0.378,0.0,0.267	-0.115
36852	"ENSG00000108557"	"RAI1"	chr17	+	17792932	17798513	17724027	17724159	17803755	17803849	36852	29,58,43	0,4,9	29,67,56	0,0,2	298	149	9.3782e-05	0.0104866	1.0,0.879,0.705	1.0,1.0,0.933	-0.116
55944	"ENSG00000251003"	"ZFPM2-AS1"	chr8	-	105787066	105787221	105784804	105785217	105787448	105787596	55944	46,1,25	6,0,4	15,18,13	0,1,0	298	149	0.000132878	0.0127129	0.793,1.0,0.758	1.0,0.9,1.0	-0.116
27667	"ENSG00000132424"	"PNISR"	chr6	-	99403828	99403882	99402539	99402710	99404602	99404702	27667	17,13,16	6,3,1	9,15,7	1,0,1	203	149	0.00102151	0.0504486	0.675,0.761,0.922	0.869,1.0,0.837	-0.116
37725	"ENSG00000204120"	"GIGYF2"	chr2	+	232845731	232845886	232844368	232844574	232847347	232847571	37725	29,52,90	7,0,1	53,56,67	0,0,0	298	149	0.00349028	0.114062	0.674,1.0,0.978	1.0,1.0,1.0	-0.116
52288	"ENSG00000115966"	"ATF2"	chr2	-	175121443	175121540	175118250	175118369	175130137	175130205	52288	5,7,2	7,1,0	5,4,7	1,1,0	246	149	0.0075304	0.189355	0.302,0.809,1.0	0.752,0.708,1.0	-0.116
59310	"ENSG00000134900"	"TPP2"	chr13	+	102651358	102651397	102649407	102649486	102657055	102657207	59310	2,0,0	13,4,2	3,1,1	7,8,6	188	149	0.0364678	0.503236	0.109,0.0,0.0	0.254,0.09,0.117	-0.117
43623	"ENSG00000141542"	"RAB40B"	chr17	-	82658490	82658562	82657910	82658134	82659579	82659657	43623	18,28,34	2,2,3	16,25,53	0,0,0	221	149	0.00157215	0.0684363	0.859,0.904,0.884	1.0,1.0,1.0	-0.118
65709	"ENSG00000144120"	"TMEM177"	chr2	+	119680831	119681123	119679202	119679276	119685657	119686507	65709	43,29,30	0,6,1	40,28,26	0,0,0	298	149	0.00301083	0.103391	1.0,0.707,0.938	1.0,1.0,1.0	-0.118
7386	"ENSG00000105613"	"MAST1"	chr19	+	12843528	12843607	12833950	12834006	12847289	12847450	7386	32,43,28	7,9,1	35,34,39	4,1,0	228	149	0.00387701	0.122767	0.749,0.757,0.948	0.851,0.957,1.0	-0.118
72000	"ENSG00000196781"	"TLE1"	chr9	-	81653973	81654036	81633468	81634301	81685675	81685720	72000	3,17,12	0,1,5	4,23,27	0,0,2	212	149	0.00868984	0.207847	1.0,0.923,0.628	1.0,1.0,0.905	-0.118
48448	"ENSG00000107164"	"FUBP3"	chr9	+	130634666	130634738	130632201	130632278	130635998	130636126	48448	37,47,58	13,9,12	65,55,46	5,5,9	221	149	0.019497	0.343105	0.657,0.779,0.765	0.898,0.881,0.775	-0.118
13491	"ENSG00000176894"	"PXMP2"	chr12	+	132695883	132696046	132690262	132690376	132704618	132704898	13491	201,194,197	26,30,16	274,252,173	22,12,0	298	149	6.31667e-05	0.00798669	0.794,0.764,0.86	0.862,0.913,1.0	-0.119
213	"ENSG00000156299"	"TIAM1"	chr21	-	31276731	31276908	31266009	31266983	31339242	31339422	213	17,19,8	5,6,0	1,14,6	0,0,2	298	149	0.00370011	0.118423	0.63,0.613,1.0	1.0,1.0,0.6	-0.119
13338	"ENSG00000183570"	"PCBP3"	chr21	+	45744230	45744337	45735391	45735429	45849960	45850095	13338	0,3,0	3,10,4	4,2,0	8,3,3	256	149	0.0162195	0.3061	0.0,0.149,0.0	0.225,0.28,0.0	-0.119
71658	"ENSG00000121864"	"ZNF639"	chr3	+	179325041	179325322	179323075	179323291	179327560	179327631	71658	1,4,8	0,0,5	6,8,6	0,1,0	298	149	0.0268796	0.418491	1.0,1.0,0.444	1.0,0.8,1.0	-0.119
28347	"ENSG00000135241"	"PNPLA8"	chr7	-	108479183	108479379	108470416	108472675	108487758	108487953	28347	34,16,10	4,0,1	20,28,8	0,0,0	298	149	0.037029	0.509604	0.81,1.0,0.833	1.0,1.0,1.0	-0.119
71271	"ENSG00000196378"	"ZNF34"	chr8	-	144777457	144777577	144772223	144774605	144778037	144778164	71271	6,14,16	0,0,5	8,4,2	0,0,0	269	149	0.0314889	0.461218	1.0,1.0,0.639	1.0,1.0,1.0	-0.12
63794	"ENSG00000099377"	"HSD3B7"	chr16	+	30986048	30986204	30985206	30985297	30986422	30986531	63794	76,55,87	13,6,0	101,60,57	2,0,1	298	149	5.19041e-05	0.00692017	0.745,0.821,1.0	0.962,1.0,0.966	-0.121
68834	"ENSG00000152683"	"SLC30A6"	chr2	+	32197317	32197392	32193888	32193983	32197706	32197826	68834	1,1,5	3,0,4	0,6,2	1,0,0	224	149	0.00133437	0.060901	0.181,1.0,0.454	0.0,1.0,1.0	-0.122
7340	"ENSG00000103121"	"CMC2"	chr16	-	80981805	80981877	80966447	80976179	81006733	81006873	7340	58,39,60	11,9,14	51,71,56	4,11,3	221	149	0.0114551	0.247965	0.78,0.745,0.743	0.896,0.813,0.926	-0.122
40151	"ENSG00000150938"	"CRIM1"	chr2	+	36396613	36396787	36355777	36356623	36441257	36441500	40151	4,23,20	0,1,4	11,19,15	0,0,0	298	149	0.027912	0.428831	1.0,0.92,0.714	1.0,1.0,1.0	-0.122
8791	"ENSG00000167978"	"SRRM2"	chr16	+	2756333	2756606	2752625	2752854	2757471	2757574	8791	47,34,44	0,12,0	57,36,47	0,0,1	298	149	0.000990756	0.0494438	1.0,0.586,1.0	1.0,1.0,0.959	-0.124
61913	"ENSG00000164494"	"PDSS2"	chr6	-	107334197	107334332	107274028	107274227	107458989	107459564	61913	12,24,35	1,2,2	9,22,9	0,0,0	284	149	0.0435746	0.566565	0.863,0.863,0.902	1.0,1.0,1.0	-0.124
57843	"ENSG00000131323"	"TRAF3"	chr14	+	102830333	102830472	102777448	102777675	102870184	102870446	57843	13,25,41	7,0,6	23,9,36	0,2,1	288	149	0.00605492	0.164758	0.49,1.0,0.78	1.0,0.7,0.949	-0.126
52687	"ENSG00000144130"	"NT5DC4"	chr2	+	112726677	112726738	112726237	112726289	112729626	112729704	52687	7,13,9	5,0,0	15,21,10	0,0,1	210	149	0.0464315	0.588111	0.498,1.0,1.0	1.0,1.0,0.876	-0.126
3693	"ENSG00000196756"	"SNHG17"	chr20	-	38434503	38434626	38430779	38431112	38435026	38435313	3693	35,43,34	5,5,0	29,44,28	0,0,0	272	149	3.12171e-05	0.00496449	0.793,0.825,1.0	1.0,1.0,1.0	-0.127
12517	"ENSG00000134864"	"GGACT"	chr13	-	100533562	100533774	100530182	100532601	100583824	100583997	12517	0,0,1	14,11,16	3,4,4	11,14,10	298	149	7.58309e-05	0.00907485	0.0,0.0,0.03	0.12,0.125,0.167	-0.127
43887	"ENSG00000121775"	"TMEM39B"	chr1	+	32077163	32077318	32075602	32075822	32091674	32091744	43887	7,11,4	13,20,12	15,17,18	19,14,22	298	149	0.0409341	0.543088	0.212,0.216,0.143	0.283,0.378,0.29	-0.127
46308	"ENSG00000154124"	"OTULIN"	chr5	+	14673641	14673718	14664717	14664977	14678680	14678775	46308	9,14,35	0,3,6	8,21,19	0,1,0	226	149	0.000159144	0.0141692	1.0,0.755,0.794	1.0,0.933,1.0	-0.128
9001	"ENSG00000161999"	"JMJD8"	chr16	-	682957	683087	681698	682874	683321	683598	9001	16,26,39	0,6,5	30,32,40	2,0,0	279	149	0.000189775	0.0158443	1.0,0.698,0.806	0.889,1.0,1.0	-0.128
66566	"ENSG00000137522"	"RNF121"	chr11	+	71987003	71987111	71960749	71960891	71990596	71990663	66566	25,44,52	2,9,10	55,61,58	3,2,4	257	149	0.0021306	0.0814499	0.879,0.739,0.751	0.914,0.946,0.894	-0.128
41883	"ENSG00000204580"	"DDR1"	chr6	+	30884537	30884710	30883444	30883929	30888687	30888814	41883	20,29,20	0,4,2	27,30,36	0,0,0	298	149	0.00491831	0.143079	1.0,0.784,0.833	1.0,1.0,1.0	-0.128
22649	"ENSG00000167716"	"WDR81"	chr17	+	1727989	1728626	1716535	1716633	1730379	1730487	22649	45,58,65	4,10,15	28,52,52	5,1,1	298	149	0.00370385	0.118437	0.849,0.744,0.684	0.737,0.963,0.963	-0.129
37241	"ENSG00000134490"	"TMEM241"	chr18	-	23421366	23421444	23399565	23399647	23437780	23437939	37241	2,12,2	0,5,0	5,9,13	0,0,0	227	149	0.017429	0.320641	1.0,0.612,1.0	1.0,1.0,1.0	-0.129
26166	"ENSG00000114125"	"RNF7"	chr3	+	141742643	141742907	141738318	141738509	141743508	141743556	26166	0,8,2	3,17,20	3,11,11	8,13,27	298	149	0.0473459	0.593826	0.0,0.19,0.048	0.158,0.297,0.169	-0.129
24475	"ENSG00000163875"	"MEAF6"	chr1	-	37495884	37495918	37493761	37493814	37501803	37501996	24475	18,28,52	2,5,6	17,34,51	0,1,0	183	149	1.53824e-05	0.00299137	0.88,0.82,0.876	1.0,0.965,1.0	-0.13
51741	"ENSG00000168350"	"DEGS2"	chr14	-	100148967	100149710	100143956	100146907	100159505	100159645	51741	17,30,31	8,1,2	29,15,22	0,1,2	298	149	0.00971393	0.223814	0.515,0.938,0.886	1.0,0.882,0.846	-0.13
12845	"ENSG00000102796"	"DHRS12"	chr13	-	51777059	51777121	51773920	51774034	51790010	51790062	12845	7,11,16	0,5,0	6,18,12	0,0,0	211	149	0.0419427	0.551965	1.0,0.608,1.0	1.0,1.0,1.0	-0.131
34551	"ENSG00000067066"	"SP100"	chr2	+	230417590	230417665	230415941	230416328	230442936	230443099	34551	27,23,77	9,1,8	62,21,49	0,0,5	224	149	0.00243099	0.0891646	0.666,0.939,0.865	1.0,1.0,0.867	-0.132
54818	"ENSG00000113430"	"IRX4"	chr5	-	1880065	1880143	1879503	1879832	1880724	1880834	54818	3,8,2	12,28,30	4,14,8	22,11,25	227	149	0.0449244	0.577252	0.141,0.158,0.042	0.107,0.455,0.174	-0.132
14547	"ENSG00000125686"	"MED1"	chr17	-	39445410	39445569	39443549	39443628	39447797	39447904	14547	0,0,0	14,4,8	0,1,8	13,7,8	298	149	0.000566369	0.0335527	0.0,0.0,0.0	0.0,0.067,0.333	-0.133
28991	"ENSG00000110514"	"MADD"	chr11	+	47273826	47273976	47269673	47269750	47274562	47274726	28991	38,63,37	3,3,4	35,39,55	0,0,0	298	149	5.82865e-05	0.00755655	0.864,0.913,0.822	1.0,1.0,1.0	-0.134
54855	"ENSG00000168014"	"C2CD3"	chr11	-	74161398	74161556	74139604	74139828	74168343	74168613	54855	18,17,22	0,4,4	20,9,18	0,1,0	298	149	0.000103467	0.0108759	1.0,0.68,0.733	1.0,0.818,1.0	-0.135
20455	"ENSG00000149187"	"CELF1"	chr11	-	47506857	47506897	47488836	47489024	47552991	47553117	20455	0,0,0	9,5,6	0,1,6	3,4,15	189	149	0.000664894	0.0375256	0.0,0.0,0.0	0.0,0.165,0.24	-0.135
59367	"ENSG00000221955"	"SLC12A8"	chr3	-	125177742	125177964	125135668	125135782	125187236	125187428	59367	10,25,15	1,5,1	11,20,25	0,2,0	298	149	0.0028001	0.0981323	0.833,0.714,0.882	1.0,0.833,1.0	-0.135
713	"ENSG00000100320"	"RBFOX2"	chr22	-	35756104	35756144	35746472	35746561	35759887	35760020	713	18,54,62	8,28,20	50,41,72	11,17,5	189	149	0.0216148	0.365511	0.639,0.603,0.71	0.782,0.655,0.919	-0.135
61617	"ENSG00000203875"	"SNHG5"	chr6	-	85677790	85678032	85677423	85677492	85678135	85678736	61617	148,98,28	9,4,5	98,90,43	2,0,0	298	149	1.80515e-05	0.00335034	0.892,0.925,0.737	0.961,1.0,1.0	-0.136
659	"ENSG00000100092"	"SH3BP1"	chr22	+	37655271	37655315	37653778	37653873	37655925	37656042	659	58,37,72	20,17,15	97,58,44	16,10,5	193	149	0.00868928	0.207847	0.691,0.627,0.787	0.824,0.817,0.872	-0.136
16247	"ENSG00000189319"	"FAM53B"	chr10	-	124696157	124696212	124681606	124682379	124706635	124706887	16247	30,51,70	9,4,20	31,81,58	6,3,0	204	149	0.000547175	0.0327581	0.709,0.903,0.719	0.791,0.952,1.0	-0.137
59458	"ENSG00000081154"	"PCNP"	chr3	+	101579841	101580004	101574189	101574279	101590214	101590270	59458	53,25,33	0,4,6	36,37,23	0,2,0	298	149	0.000910688	0.0464281	1.0,0.758,0.733	1.0,0.902,1.0	-0.137
55621	"ENSG00000029363"	"BCLAF1"	chr6	-	136267028	136267175	136261264	136261477	136268161	136268273	55621	62,24,42	10,4,3	54,63,31	7,0,0	296	149	0.0122685	0.25815	0.757,0.751,0.876	0.795,1.0,1.0	-0.137
62523	"ENSG00000135597"	"REPS1"	chr6	-	138926400	138926478	138921036	138921124	138929976	138929997	62523	27,23,21	1,7,6	24,22,34	2,1,2	227	149	0.0145563	0.286802	0.947,0.683,0.697	0.887,0.935,0.918	-0.138
4454	"ENSG00000141424"	"SLC39A6"	chr18	-	36126218	36127016	36124519	36124700	36129113	36129340	4454	49,13,23	0,3,3	33,44,17	2,0,0	298	149	0.0157655	0.300419	1.0,0.684,0.793	0.892,1.0,1.0	-0.138
4938	"ENSG00000167302"	"TEPSIN"	chr17	-	81232314	81232518	81231846	81232021	81233431	81233503	4938	25,46,46	9,3,6	66,65,57	6,0,6	298	149	0.0428865	0.560674	0.581,0.885,0.793	0.846,1.0,0.826	-0.138
32530	"ENSG00000285596"	"AC017116"	chr7	-	44036671	44036809	44033932	44034311	44038806	44038978	32530	0,1,0	3,20,14	3,4,3	16,8,9	287	149	0.000169206	0.0146599	0.0,0.025,0.0	0.089,0.206,0.148	-0.139
7062	"ENSG00000141013"	"GAS8"	chr16	+	90020043	90020156	90019636	90019768	90027635	90027722	7062	1,0,0	8,16,3	4,4,1	7,9,15	262	149	0.000406841	0.0261827	0.066,0.0,0.0	0.245,0.202,0.037	-0.139
69972	"ENSG00000118855"	"MFSD1"	chr3	+	158805340	158805474	158804318	158804371	158807039	158807082	69972	6,10,33	3,2,0	6,11,11	0,0,3	283	149	0.0390429	0.526526	0.513,0.725,1.0	1.0,1.0,0.659	-0.14
62511	"ENSG00000128563"	"PRKRIP1"	chr7	+	102395976	102396537	102376211	102376322	102397619	102397698	62511	43,59,102	3,7,10	53,100,101	1,1,0	298	149	1.23299e-07	0.000110298	0.878,0.808,0.836	0.964,0.98,1.0	-0.141
53332	"ENSG00000128683"	"GAD1"	chr2	+	170842568	170842648	170836792	170836883	170844044	170844157	53332	19,26,30	2,4,2	31,16,21	0,0,0	229	149	0.000265692	0.0196021	0.861,0.809,0.907	1.0,1.0,1.0	-0.141
14037	"ENSG00000176834"	"VSIG10"	chr12	-	118135638	118135742	118126480	118126670	118135856	118135948	14037	0,3,0	4,3,12	1,5,0	1,4,2	253	149	0.0484687	0.601981	0.0,0.371,0.0	0.371,0.424,0.0	-0.141
23239	"ENSG00000176715"	"ACSF3"	chr16	+	89098590	89098763	89093851	89093996	89102603	89102759	23239	42,64,77	25,22,20	78,81,73	17,14,16	298	149	0.0196651	0.344465	0.457,0.593,0.658	0.696,0.743,0.695	-0.142
60141	"ENSG00000137337"	"MDC1"	chr6	-	30707565	30708357	30707383	30707454	30711411	30711504	60141	39,16,18	50,32,11	50,52,28	32,25,20	298	149	0.0133638	0.272469	0.281,0.2,0.45	0.439,0.51,0.412	-0.143
70616	"ENSG00000147687"	"TATDN1"	chr8	-	124493832	124493959	124488484	124488696	124495471	124495542	70616	189,25,32	108,21,36	118,51,30	61,21,13	276	149	0.0320585	0.466118	0.486,0.391,0.324	0.511,0.567,0.555	-0.144
14211	"ENSG00000100105"	"PATZ1"	chr22	-	31328786	31328859	31325808	31327309	31335691	31335863	14211	2,20,8	25,27,28	15,13,12	16,20,20	222	149	0.0371481	0.510262	0.051,0.332,0.161	0.386,0.304,0.287	-0.144
28942	"ENSG00000114859"	"CLCN2"	chr3	-	184358681	184358783	184358181	184358310	184358974	184359107	28942	13,28,32	4,1,2	15,23,28	0,0,1	251	149	0.00210883	0.0810506	0.659,0.943,0.905	1.0,1.0,0.943	-0.145
19509	"ENSG00000160172"	"FAM86C2P"	chr11	-	67796683	67796833	67791766	67793293	67803001	67803064	19509	4,0,0	0,1,3	7,8,0	2,1,1	298	149	0.028783	0.437175	1.0,0.0,0.0	0.636,0.8,0.0	-0.145
40410	"ENSG00000185436"	"IFNLR1"	chr1	-	24180730	24180854	24169416	24169601	24187190	24187248	40410	6,7,15	0,2,4	15,13,12	0,0,2	273	149	0.0010086	0.0501247	1.0,0.656,0.672	1.0,1.0,0.766	-0.146
70193	"ENSG00000164695"	"CHMP4C"	chr8	+	81753063	81753241	81732447	81732816	81755369	81755484	70193	22,20,21	3,5,2	26,22,45	1,2,1	298	149	0.00912655	0.214564	0.786,0.667,0.84	0.929,0.846,0.957	-0.146
54693	"ENSG00000108375"	"RNF43"	chr17	-	58415325	58415759	58370910	58371033	58417016	58417582	54693	4,20,11	0,4,1	21,26,12	0,0,0	298	149	0.0138732	0.278101	1.0,0.714,0.846	1.0,1.0,1.0	-0.147
34952	"ENSG00000272752"	"STAG3L5P-PVRIG2P-PILRB"	chr7	+	100353372	100354012	100353209	100353270	100355142	100355240	34952	16,14,33	0,7,3	10,15,19	0,2,0	298	149	0.00225665	0.0845525	1.0,0.5,0.846	1.0,0.789,1.0	-0.148
39319	"ENSG00000197586"	"ENTPD6"	chr20	+	25206521	25206590	25196153	25196254	25207075	25207397	39319	8,22,18	1,0,5	13,22,11	0,0,0	218	149	0.00551138	0.154433	0.845,1.0,0.711	1.0,1.0,1.0	-0.148
10149	"ENSG00000104164"	"BLOC1S6"	chr15	+	45603099	45603187	45592134	45592276	45605427	45605470	10149	20,13,12	0,0,6	5,12,3	0,0,0	237	149	0.0118208	0.253125	1.0,1.0,0.557	1.0,1.0,1.0	-0.148
16115	"ENSG00000254536"	"AL360181"	chr10	+	133389589	133389747	133388955	133389068	133391311	133391428	16115	70,68,45	7,4,11	89,52,53	2,2,1	298	149	0.000195192	0.016056	0.833,0.895,0.672	0.957,0.929,0.964	-0.15
51786	"ENSG00000138092"	"CENPO"	chr2	+	24793851	24793965	24793305	24793501	24799674	24799794	51786	34,30,18	0,7,2	28,20,21	0,0,0	263	149	4.17898e-05	0.00595746	1.0,0.708,0.836	1.0,1.0,1.0	-0.152
196	"ENSG00000249624"	"AP000295"	chr21	+	33260596	33260727	33252661	33252830	33262792	33263637	196	11,32,32	2,2,4	22,18,35	0,1,0	280	149	0.000406839	0.0261827	0.745,0.895,0.81	1.0,0.905,1.0	-0.152
27861	"ENSG00000272886"	"DCP1A"	chr3	-	53304176	53304290	53292068	53292827	53312240	53312379	27861	9,11,9	1,0,4	21,11,8	0,1,0	263	149	0.0136317	0.276322	0.836,1.0,0.56	1.0,0.862,1.0	-0.155
6865	"ENSG00000108523"	"RNF167"	chr17	+	4940486	4940726	4940007	4940230	4941076	4941157	6865	29,24,32	7,2,0	35,45,25	0,0,0	298	149	3.19336e-05	0.00501161	0.674,0.857,1.0	1.0,1.0,1.0	-0.156
44260	"ENSG00000124313"	"IQSEC2"	chrX	-	53279563	53279659	53255799	53256061	53281495	53281535	44260	0,4,2	4,15,12	12,5,3	19,9,9	245	149	0.011076	0.242103	0.0,0.14,0.092	0.278,0.253,0.169	-0.156
42468	"ENSG00000267575"	"AC006504"	chr19	+	27797753	27798176	27793430	27793650	27805604	27805811	42468	8,26,31	0,5,6	29,23,44	0,0,2	298	149	8.04414e-05	0.00940639	1.0,0.722,0.721	1.0,1.0,0.917	-0.158
23614	"ENSG00000160050"	"CCDC28B"	chr1	+	32204232	32204379	32203878	32204045	32204597	32204620	23614	16,12,21	4,1,0	19,19,23	0,0,0	296	149	0.0222589	0.371834	0.668,0.858,1.0	1.0,1.0,1.0	-0.158
60796	"ENSG00000184182"	"UBE2F"	chr2	+	238032221	238032254	238025341	238025412	238035877	238035922	60796	5,19,22	0,5,8	8,31,33	0,2,0	182	149	2.48877e-05	0.00420098	1.0,0.757,0.692	1.0,0.927,1.0	-0.159
38755	"ENSG00000137070"	"IL11RA"	chr9	+	34660853	34660936	34660503	34660600	34661481	34661850	38755	23,32,63	11,5,9	22,48,27	1,4,3	232	149	0.0123622	0.259439	0.573,0.804,0.818	0.934,0.885,0.853	-0.159
6183	"ENSG00000278540"	"ACACA"	chr17	-	37210466	37210490	37207656	37207800	37221723	37221842	6183	26,45,23	6,4,6	41,42,45	2,0,0	173	149	1.90064e-06	0.000703809	0.789,0.906,0.768	0.946,1.0,1.0	-0.161
45716	"ENSG00000116299"	"ELAPOR1"	chr1	+	109199853	109199980	109198572	109198674	109200058	109200237	45716	13,43,25	5,0,3	34,31,28	1,0,1	276	149	0.00207035	0.0799151	0.584,1.0,0.818	0.948,1.0,0.938	-0.161
42442	"ENSG00000163660"	"CCNL1"	chr3	-	157157006	157157083	157153035	157153156	157158865	157158975	42442	1,1,1	2,12,8	3,3,3	3,9,5	226	149	0.00499026	0.144584	0.248,0.052,0.076	0.397,0.18,0.283	-0.161
14702	"ENSG00000179912"	"R3HDM2"	chr12	-	57292571	57292667	57289008	57289040	57295398	57295507	14702	30,21,18	6,1,9	18,41,14	3,2,0	245	149	0.0143494	0.284617	0.753,0.927,0.549	0.785,0.926,1.0	-0.161
29173	"ENSG00000163701"	"IL17RE"	chr3	+	9904031	9904151	9903396	9903412	9906363	9906461	29173	21,45,54	0,4,16	28,25,43	0,0,0	269	149	9.22129e-07	0.000434345	1.0,0.862,0.651	1.0,1.0,1.0	-0.162
71240	"ENSG00000147642"	"SYBU"	chr8	-	109642727	109642929	109618841	109619039	109644635	109644716	71240	11,11,17	0,0,8	18,13,16	0,0,0	298	149	0.00137552	0.0620666	1.0,1.0,0.515	1.0,1.0,1.0	-0.162
64644	"ENSG00000204842"	"ATXN2"	chr12	-	111510384	111510444	111509890	111509998	111513356	111513539	64644	11,12,6	2,3,1	2,7,7	0,1,0	209	149	0.00145497	0.0649147	0.797,0.74,0.811	1.0,0.833,1.0	-0.162
12208	"ENSG00000165801"	"ARHGEF40"	chr14	+	21073931	21075180	21070272	21070399	21075331	21075499	12208	21,36,41	4,10,0	19,35,39	0,3,0	298	149	0.00148635	0.06615	0.724,0.643,1.0	1.0,0.854,1.0	-0.162
26832	"ENSG00000243276"	"AC068633"	chr3	-	118683686	118683772	118662409	118662490	118810706	118810757	26832	17,5,9	3,5,0	29,11,6	0,0,2	235	149	0.00221486	0.0836643	0.782,0.388,1.0	1.0,1.0,0.655	-0.162
7010	"ENSG00000132359"	"RAP1GAP2"	chr17	+	3005340	3005440	2998220	2998376	3005954	3006041	7010	7,18,12	0,4,2	21,4,15	0,0,0	249	149	0.00171384	0.0715575	1.0,0.729,0.782	1.0,1.0,1.0	-0.163
8784	"ENSG00000059122"	"FLYWCH1"	chr16	+	2928823	2928917	2915407	2915476	2929612	2929916	8784	1,17,12	0,0,7	2,9,3	0,0,0	243	149	0.00308141	0.105336	1.0,1.0,0.512	1.0,1.0,1.0	-0.163
8065	"ENSG00000156860"	"FBRS"	chr16	+	30661179	30661215	30660262	30660442	30662419	30662468	8065	13,26,20	6,21,20	24,15,34	7,8,10	185	149	0.0166161	0.309256	0.636,0.499,0.446	0.734,0.602,0.733	-0.163
63885	"ENSG00000128581"	"IFT22"	chr7	-	101318123	101318213	101315824	101316542	101321670	101321764	63885	25,64,56	6,4,8	63,76,79	0,1,2	239	149	1.576e-06	0.000655727	0.722,0.909,0.814	1.0,0.979,0.961	-0.165
45632	"ENSG00000115459"	"ELMOD3"	chr2	+	85371439	85371562	85371085	85371209	85377343	85377474	45632	8,35,41	1,0,10	18,18,41	0,0,0	272	149	1.93379e-05	0.0035451	0.814,1.0,0.692	1.0,1.0,1.0	-0.165
62911	"ENSG00000197948"	"FCHSD1"	chr5	-	141642396	141642503	141641701	141641757	141644217	141644438	62911	1,7,16	0,4,4	2,3,8	0,0,2	256	149	0.00321403	0.107622	1.0,0.505,0.7	1.0,1.0,0.7	-0.165
29132	"ENSG00000157020"	"SEC13"	chr3	-	10319138	10319172	10318049	10318094	10320508	10321060	29132	3,0,0	7,13,19	4,0,3	3,20,8	183	149	0.0167191	0.310614	0.259,0.0,0.0	0.521,0.0,0.234	-0.165
68557	"ENSG00000085185"	"BCORL1"	chrX	+	130024989	130025379	130022896	130022977	130028634	130028861	68557	40,121,82	7,13,34	86,102,126	0,11,16	298	149	0.00687981	0.178645	0.741,0.823,0.547	1.0,0.823,0.797	-0.17
47001	"ENSG00000154144"	"TBRG1"	chr11	+	124626472	124626609	124625670	124625903	124626692	124626751	47001	5,11,31	0,6,0	14,25,40	0,0,0	286	149	0.0109589	0.240472	1.0,0.489,1.0	1.0,1.0,1.0	-0.17
62932	"ENSG00000164674"	"SYTL3"	chr6	+	158713799	158713878	158708321	158708391	158718086	158718211	62932	29,40,16	6,14,4	26,31,41	5,2,1	228	149	0.00187724	0.0759859	0.76,0.651,0.723	0.773,0.91,0.964	-0.171
4652	"ENSG00000176014"	"TUBB6"	chr18	+	12310942	12311053	12308262	12308349	12329145	12329826	4652	15,26,33	7,10,9	29,31,32	4,6,5	260	149	0.02614	0.412076	0.551,0.598,0.678	0.806,0.748,0.786	-0.171
21665	"ENSG00000187609"	"EXD3"	chr9	-	137307607	137307646	137306895	137307263	137309606	137309700	21665	9,12,5	2,4,0	3,3,4	0,0,0	188	149	0.00166045	0.0704855	0.781,0.704,1.0	1.0,1.0,1.0	-0.172
47877	"ENSG00000222041"	"CYTOR"	chr2	+	87480222	87480423	87455844	87455973	87521206	87521504	47877	7,21,19	0,3,4	6,6,11	0,0,0	298	149	0.000158934	0.0141692	1.0,0.778,0.704	1.0,1.0,1.0	-0.173
35213	"ENSG00000047578"	"KIAA0556"	chr16	+	27648603	27648735	27631064	27631162	27677728	27677996	35213	13,31,19	1,5,10	16,11,14	0,3,0	281	149	0.004584	0.137489	0.873,0.767,0.502	1.0,0.66,1.0	-0.173
30489	"ENSG00000105223"	"PLD3"	chr19	+	40365717	40365930	40348684	40348768	40366383	40366510	30489	34,50,83	25,0,0	11,46,49	0,0,2	298	149	0.0130047	0.267854	0.405,1.0,1.0	1.0,1.0,0.925	-0.173
45197	"ENSG00000189050"	"RNFT1"	chr17	-	59960067	59960168	59958290	59958444	59962539	59962599	45197	3,1,3	5,0,0	7,6,5	0,1,0	250	149	0.0438089	0.567912	0.263,1.0,1.0	1.0,0.781,1.0	-0.173
34003	"ENSG00000136699"	"SMPD4"	chr2	-	130161185	130161272	130157250	130157396	130164373	130164445	34003	108,120,97	93,84,92	287,240,185	88,100,96	236	149	2.56835e-06	0.000850931	0.423,0.474,0.4	0.673,0.602,0.549	-0.176
34414	"ENSG00000126091"	"ST3GAL3"	chr1	+	43792101	43792149	43736232	43736380	43814890	43814933	34414	17,11,14	3,0,8	13,13,5	1,0,0	197	149	0.000127844	0.0123302	0.811,1.0,0.57	0.908,1.0,1.0	-0.176
22666	"ENSG00000119523"	"ALG2"	chr9	-	99220978	99221137	99216425	99218836	99221546	99221942	22666	4,6,15	23,25,61	7,17,16	13,14,26	298	149	0.000305507	0.0214172	0.08,0.107,0.109	0.212,0.378,0.235	-0.176
33619	"ENSG00000105662"	"CRTC1"	chr19	+	18771441	18771546	18768484	18768793	18774899	18774986	33619	38,20,43	7,4,1	50,33,32	0,0,0	254	149	2.51439e-06	0.000848526	0.761,0.746,0.962	1.0,1.0,1.0	-0.177
18348	"ENSG00000285509"	"TBCEL-TECTA"	chr11	+	121055051	121055308	121053550	121053732	121058344	121058471	18348	8,7,4	4,2,0	4,11,8	1,0,0	298	149	0.00068572	0.0383982	0.5,0.636,1.0	0.667,1.0,1.0	-0.177
11786	"ENSG00000092208"	"GEMIN2"	chr14	+	39124991	39125036	39122429	39122543	39128279	39128341	11786	23,15,9	8,0,3	15,17,4	1,0,0	194	149	8.99618e-05	0.0101546	0.688,1.0,0.697	0.92,1.0,1.0	-0.178
19076	"ENSG00000100417"	"PMM1"	chr22	-	41589051	41589163	41584526	41584603	41589718	41589847	19076	0,0,1	4,3,1	8,2,2	7,7,2	261	149	0.000151973	0.0138369	0.0,0.0,0.363	0.395,0.14,0.363	-0.178
57757	"ENSG00000101346"	"POFUT1"	chr20	+	32210070	32210192	32207879	32208065	32215268	32215451	57757	35,51,69	7,13,3	56,55,61	0,3,1	271	149	1.94187e-05	0.0035451	0.733,0.683,0.927	1.0,0.91,0.971	-0.179
48506	"ENSG00000090266"	"NDUFB2"	chr7	+	140700869	140700959	140697223	140697391	140702865	140703010	48506	9,10,17	0,5,2	16,11,22	0,0,1	239	149	0.000619323	0.0358793	1.0,0.555,0.841	1.0,1.0,0.932	-0.179
61700	"ENSG00000135336"	"ORC3"	chr6	+	87616313	87616427	87612088	87612248	87621353	87621487	61700	108,11,24	4,2,5	52,29,11	1,0,0	263	149	0.00016455	0.0144096	0.939,0.757,0.731	0.967,1.0,1.0	-0.18
50277	"ENSG00000022567"	"SLC45A4"	chr8	-	141221576	141221765	141219649	141219829	141253988	141254629	50277	8,16,17	3,1,2	1,26,33	0,2,1	298	149	0.0418083	0.551008	0.571,0.889,0.81	1.0,0.867,0.943	-0.18
5853	"ENSG00000161692"	"DBF4B"	chr17	+	44741335	44741452	44738378	44738424	44747082	44747191	5853	17,24,22	2,17,0	23,37,25	3,0,0	266	149	0.00201687	0.0789581	0.826,0.442,1.0	0.811,1.0,1.0	-0.181
70282	"ENSG00000156162"	"DPY19L4"	chr8	+	94734629	94734754	94726330	94726441	94738368	94738459	70282	12,16,20	4,0,4	8,11,16	0,0,1	274	149	0.000284603	0.0203502	0.62,1.0,0.731	1.0,1.0,0.897	-0.182
25590	"ENSG00000133056"	"PIK3C2B"	chr1	-	204489815	204489931	204468869	204469886	204494355	204494701	25590	0,0,0	3,8,11	2,4,0	3,6,3	265	149	0.00310138	0.105428	0.0,0.0,0.0	0.273,0.273,0.0	-0.182
49863	"ENSG00000038427"	"VCAN"	chr5	+	83537006	83542268	83512102	83512396	83545536	83545650	49863	13,17,10	0,0,6	27,25,6	0,0,0	298	149	0.0109576	0.240472	1.0,1.0,0.455	1.0,1.0,1.0	-0.182
21961	"ENSG00000187239"	"FNBP1"	chr9	-	129923843	129924026	129908889	129908999	129924959	129925157	21961	12,12,21	0,5,2	6,20,29	0,0,1	298	149	0.000571355	0.0337364	1.0,0.545,0.84	1.0,1.0,0.935	-0.183
61476	"ENSG00000078967"	"UBE2D4"	chr7	+	43928013	43928111	43926437	43926556	43938430	43938494	61476	0,0,0	4,16,25	7,2,4	9,8,21	247	149	1.90793e-06	0.000703809	0.0,0.0,0.0	0.319,0.131,0.103	-0.184
37185	"ENSG00000152348"	"ATG10"	chr5	+	82164398	82164537	82058494	82058602	82178489	82178587	37185	3,27,16	0,2,10	22,16,14	0,0,1	288	149	0.000132256	0.0126873	1.0,0.875,0.453	1.0,1.0,0.879	-0.184
25124	"ENSG00000122696"	"SLC25A51"	chr9	-	37899828	37899950	37887603	37888592	37904067	37904127	25124	13,8,22	0,4,1	12,9,24	0,0,0	271	149	0.0239129	0.388579	1.0,0.524,0.924	1.0,1.0,1.0	-0.184
10349	"ENSG00000137841"	"PLCB2"	chr15	-	40290024	40290082	40289065	40289358	40290576	40290672	10349	3,4,1	2,4,3	4,6,0	0,2,1	207	149	0.0460391	0.586253	0.519,0.419,0.194	1.0,0.683,0.0	-0.184
17436	"ENSG00000108064"	"TFAM"	chr10	+	58390764	58390860	58388669	58388819	58394357	58394414	17436	45,20,25	3,5,3	50,23,21	0,0,0	245	149	4.2953e-06	0.00121019	0.901,0.709,0.835	1.0,1.0,1.0	-0.185
57751	"ENSG00000136536"	"MARCHF7"	chr2	+	159764625	159764674	159762879	159762993	159767283	159767409	57751	56,16,6	5,0,5	47,28,20	1,1,0	198	149	0.00119061	0.0561296	0.894,1.0,0.475	0.973,0.955,1.0	-0.186
18223	"ENSG00000198964"	"SGMS1"	chr10	-	50327204	50327322	50311261	50311415	50343491	50344345	18223	7,10,7	0,0,5	11,15,26	0,0,0	267	149	0.0272324	0.421831	1.0,1.0,0.439	1.0,1.0,1.0	-0.187
13844	"ENSG00000174989"	"FBXW8"	chr12	+	116949617	116949706	116945363	116945528	116964696	116964854	13844	12,21,26	4,5,0	27,22,17	1,0,0	238	149	8.71542e-05	0.00990017	0.653,0.724,1.0	0.944,1.0,1.0	-0.189
11369	"ENSG00000133961"	"NUMB"	chr14	-	73279280	73279424	73275209	73277293	73282358	73282505	11369	14,19,35	4,16,11	22,34,35	4,5,8	293	149	0.0229643	0.379958	0.64,0.377,0.618	0.737,0.776,0.69	-0.189
34251	"ENSG00000113163"	"CERT1"	chr5	-	75399309	75399387	75389591	75389687	75400204	75400297	34251	0,0,0	4,4,14	0,0,6	1,7,3	227	149	0.0288114	0.437175	0.0,0.0,0.0	0.0,0.0,0.568	-0.189
15259	"ENSG00000111371"	"SLC38A1"	chr12	-	46239678	46239893	46229563	46229639	46268525	46268995	15259	26,25,4	4,0,1	26,15,8	0,0,0	298	149	0.031455	0.461166	0.765,1.0,0.667	1.0,1.0,1.0	-0.189
9443	"ENSG00000086666"	"ZFAND6"	chr15	+	80098415	80098578	80072563	80072647	80120327	80120405	9443	14,4,15	2,5,0	15,8,11	2,0,1	298	149	0.0450613	0.577795	0.778,0.286,1.0	0.789,1.0,0.846	-0.19
51793	"ENSG00000167522"	"ANKRD11"	chr16	-	89286038	89286186	89275092	89275191	89288527	89288670	51793	19,30,13	1,0,6	10,34,18	0,0,0	297	149	0.00114883	0.054737	0.905,1.0,0.521	1.0,1.0,1.0	-0.191
35342	"ENSG00000109670"	"FBXW7"	chr4	-	152412479	152412529	152411159	152411872	152534940	152535033	35342	1,0,0	1,4,1	0,8,0	2,0,3	199	149	0.0439625	0.569333	0.428,0.0,0.0	0.0,1.0,0.0	-0.191
45985	"ENSG00000010803"	"SCMH1"	chr1	-	41152598	41152741	41151613	41151684	41159724	41159933	45985	15,11,3	1,3,1	14,10,8	0,2,0	292	149	0.0163949	0.307303	0.884,0.652,0.605	1.0,0.718,1.0	-0.192
47853	"ENSG00000214922"	"HLA-F-AS1"	chr6	-	29747147	29747425	29745472	29745727	29748899	29749049	47853	0,4,1	8,10,17	10,1,5	7,7,6	298	149	0.00215189	0.0819137	0.0,0.167,0.029	0.417,0.067,0.294	-0.194
16088	"ENSG00000240370"	"RPL13P5"	chr12	+	6882195	6882327	6873388	6873781	6883703	6883919	16088	9,8,8	3,0,6	16,3,5	0,1,0	281	149	0.000148433	0.0137925	0.614,1.0,0.414	1.0,0.614,1.0	-0.195
32074	"ENSG00000115687"	"PASK"	chr2	-	241115042	241115177	241112239	241112439	241122731	241122899	32074	6,13,9	1,6,0	17,14,8	0,1,0	284	149	0.000516248	0.0314692	0.759,0.532,1.0	1.0,0.88,1.0	-0.196
63388	"ENSG00000157927"	"RADIL"	chr7	-	4822393	4822554	4817238	4817351	4832140	4832178	63388	7,17,13	5,0,0	18,7,11	0,0,0	298	149	0.0303975	0.452089	0.412,1.0,1.0	1.0,1.0,1.0	-0.196
69706	"ENSG00000106078"	"COBL"	chr7	-	51172455	51172530	51136157	51136331	51184101	51184199	69706	1,0,2	9,14,19	6,8,7	19,8,26	224	149	9.11966e-05	0.0102616	0.069,0.0,0.065	0.174,0.399,0.152	-0.197
12895	"ENSG00000176124"	"DLEU1"	chr13	+	50083141	50083194	50082168	50082557	50104703	50107218	12895	11,5,11	14,22,23	27,16,15	21,13,16	202	149	0.00483882	0.141456	0.367,0.144,0.261	0.487,0.476,0.409	-0.2
50775	"ENSG00000164867"	"NOS3"	chr7	+	150993752	150993961	150991016	150991300	150995202	150995314	50775	1,2,2	2,7,0	6,3,2	0,2,1	298	149	0.0437297	0.567912	0.2,0.125,1.0	1.0,0.429,0.5	-0.201
53982	"ENSG00000020426"	"MNAT1"	chr14	+	60968228	60968397	60879713	60879835	60968558	60968680	53982	35,21,19	10,4,2	35,37,31	3,0,1	298	149	0.000225553	0.0177839	0.636,0.724,0.826	0.854,1.0,0.939	-0.202
3302	"ENSG00000198858"	"R3HDM4"	chr19	-	902518	902627	901975	902434	913086	913204	3302	6,11,14	3,2,2	8,13,7	1,1,0	258	149	0.0024407	0.0891646	0.536,0.761,0.802	0.822,0.882,1.0	-0.202
33254	"ENSG00000144134"	"RABL2A"	chr2	+	113635050	113635130	113634152	113634232	113641352	113641450	33254	6,10,5	0,10,2	2,5,6	0,2,0	229	149	0.00315543	0.106516	1.0,0.394,0.619	1.0,0.619,1.0	-0.202
44498	"ENSG00000152749"	"GPR180"	chr13	+	94619149	94619330	94612189	94612390	94619467	94619517	44498	19,6,4	3,4,0	8,15,10	1,0,0	298	149	0.000145773	0.0136189	0.76,0.429,1.0	0.8,1.0,1.0	-0.204
10503	"ENSG00000114062"	"UBE3A"	chr15	-	25409087	25409207	25405460	25405502	25438488	25438999	10503	2,0,0	8,3,4	8,2,0	3,7,5	269	149	0.00409189	0.127429	0.122,0.0,0.0	0.596,0.137,0.0	-0.204
18250	"ENSG00000150433"	"TMEM218"	chr11	-	125102131	125102351	125101200	125101303	125102733	125102809	18250	7,13,14	0,3,3	15,16,15	0,0,0	298	149	0.000701274	0.0390856	1.0,0.684,0.7	1.0,1.0,1.0	-0.205
44680	"ENSG00000258644"	"SYNJ2BP-COX16"	chr14	-	70375675	70375771	70342657	70342729	70416899	70416984	44680	8,11,12	1,2,2	2,5,5	0,0,0	245	149	0.00459876	0.137733	0.83,0.77,0.785	1.0,1.0,1.0	-0.205
24114	"ENSG00000145388"	"METTL14"	chr4	+	118705610	118705821	118703934	118704051	118709997	118715430	24114	43,14,7	1,2,3	22,16,20	0,1,0	298	149	0.00319069	0.107302	0.956,0.778,0.538	1.0,0.889,1.0	-0.206
50313	"ENSG00000284952"	"AC104472"	chr3	-	155833467	155833585	155829687	155829903	155833856	155834041	50313	12,8,27	3,2,0	7,16,16	0,0,0	267	149	0.0191836	0.339446	0.691,0.691,1.0	1.0,1.0,1.0	-0.206
45348	"ENSG00000125962"	"ARMCX5"	chrX	+	102600919	102601032	102599509	102599847	102601463	102601509	45348	1,3,2	0,2,4	10,6,4	0,1,2	262	149	0.0153333	0.295295	1.0,0.46,0.221	1.0,0.773,0.532	-0.208
55382	"ENSG00000164190"	"NIPBL"	chr5	+	37000372	37000570	36995621	36995804	37000816	37000888	55382	1,7,6	0,0,5	5,6,4	0,0,0	298	149	0.022575	0.374931	1.0,1.0,0.375	1.0,1.0,1.0	-0.208
56894	"ENSG00000109814"	"UGDH"	chr4	-	39521350	39521544	39514082	39514184	39527282	39527437	56894	30,29,6	0,0,5	21,17,16	0,0,0	298	149	0.0381726	0.519153	1.0,1.0,0.375	1.0,1.0,1.0	-0.208
26014	"ENSG00000026559"	"KCNG1"	chr20	-	51013728	51013844	51012358	51012416	51022653	51023081	26014	17,41,16	0,14,3	23,25,20	0,0,0	265	149	8.17068e-07	0.000400498	1.0,0.622,0.75	1.0,1.0,1.0	-0.209
42311	"ENSG00000143033"	"MTF2"	chr1	+	93133927	93133980	93133702	93133808	93136669	93136852	42311	1,0,0	11,1,3	0,0,6	5,6,2	202	149	0.046632	0.588982	0.063,0.0,0.0	0.0,0.0,0.689	-0.209
71717	"ENSG00000122741"	"DCAF10"	chr9	+	37842088	37842286	37819287	37819401	37854779	37854982	71717	12,29,28	0,9,8	15,33,34	0,1,1	298	149	1.7442e-05	0.00330217	1.0,0.617,0.636	1.0,0.943,0.944	-0.211
17084	"ENSG00000225484"	"NUTM2B-AS1"	chr10	-	79808758	79808832	79804484	79804527	79814612	79814716	17084	1,9,7	0,3,2	3,12,7	0,0,0	223	149	0.00499619	0.144639	1.0,0.667,0.7	1.0,1.0,1.0	-0.211
59877	"ENSG00000112812"	"PRSS16"	chr6	+	27251749	27252040	27251201	27251264	27252807	27252949	59877	16,16,22	5,4,4	21,18,17	1,0,3	298	149	0.00660967	0.174287	0.615,0.667,0.733	0.913,1.0,0.739	-0.212
59057	"ENSG00000058804"	"NDC1"	chr1	-	53835499	53835620	53832489	53832591	53838204	53838296	59057	20,21,17	5,2,3	28,19,32	1,0,0	270	149	7.81965e-06	0.0018169	0.688,0.853,0.758	0.939,1.0,1.0	-0.213
7240	"ENSG00000172530"	"BANP"	chr16	+	88004294	88004411	87984059	87984259	88006089	88006265	7240	10,45,49	9,18,21	39,32,39	4,11,9	266	149	0.0218707	0.36835	0.384,0.583,0.567	0.845,0.62,0.708	-0.213
2299	"ENSG00000118160"	"SLC8A2"	chr19	-	47441168	47441186	47437848	47437973	47441336	47441440	2299	8,10,6	3,7,1	12,10,4	0,3,0	167	149	0.00267082	0.0949029	0.704,0.56,0.843	1.0,0.748,1.0	-0.214
52590	"ENSG00000188511"	"C22orf34"	chr22	-	49416601	49416735	49414523	49416035	49416814	49416928	52590	1,9,9	0,10,6	6,8,18	0,6,0	283	149	0.0323448	0.468947	1.0,0.322,0.441	1.0,0.412,1.0	-0.216
50611	"ENSG00000187079"	"TEAD1"	chr11	+	12675408	12675561	12674420	12674834	12764178	12764434	50611	6,8,5	2,0,4	1,7,12	0,1,1	298	149	0.000987025	0.0493264	0.6,1.0,0.385	1.0,0.778,0.857	-0.217
26804	"ENSG00000152556"	"PFKM"	chr12	+	48107364	48107455	48105922	48106137	48108071	48108194	26804	8,3,1	4,5,0	19,7,3	0,0,2	240	149	0.00100511	0.0500207	0.554,0.271,1.0	1.0,1.0,0.482	-0.219
14985	"ENSG00000167779"	"IGFBP6"	chr12	+	53099266	53099324	53098856	53098958	53100711	53100857	14985	13,1,2	56,23,16	12,10,9	42,15,9	207	149	0.00279348	0.0980927	0.143,0.03,0.083	0.171,0.324,0.419	-0.219
15191	"ENSG00000123352"	"SPATS2"	chr12	+	49406472	49406565	49367517	49367587	49460769	49461037	15191	0,0,0	10,15,13	0,4,1	12,2,5	242	149	0.0455954	0.58143	0.0,0.0,0.0	0.0,0.552,0.11	-0.221
5362	"ENSG00000100058"	"CRYBB2P1"	chr22	+	25455711	25455840	25448104	25448284	25457258	25457401	5362	33,29,15	2,4,6	37,25,26	0,0,1	278	149	6.29116e-06	0.00158528	0.898,0.795,0.573	1.0,1.0,0.933	-0.222
52753	"ENSG00000104756"	"KCTD9"	chr8	-	25446079	25446250	25440576	25440673	25458198	25458476	52753	7,12,13	4,0,1	2,15,6	0,0,0	298	149	0.0110601	0.241902	0.467,1.0,0.867	1.0,1.0,1.0	-0.222
782	"ENSG00000241878"	"PISD"	chr22	-	31628002	31628210	31625762	31626016	31628852	31628981	782	1,2,0	0,2,2	1,3,4	0,3,1	298	149	0.0281731	0.432101	1.0,0.333,0.0	1.0,0.333,0.667	-0.222
33141	"ENSG00000110060"	"PUS3"	chr11	-	125895906	125896330	125895223	125895789	125903169	125903206	33141	3,12,22	2,0,3	7,14,30	0,0,2	298	149	0.0288617	0.43746	0.429,1.0,0.786	1.0,1.0,0.882	-0.222
71162	"ENSG00000104529"	"EEF1D"	chr8	-	143592646	143592893	143590607	143590735	143597347	143597413	71162	1,15,1	8,5,0	9,7,1	0,0,1	298	149	0.000114787	0.0115374	0.059,0.6,1.0	1.0,1.0,0.333	-0.225
29768	"ENSG00000145014"	"TMEM44"	chr3	-	194625896	194625926	194623528	194623695	194628382	194628509	29768	4,4,7	1,0,8	8,8,7	0,1,0	179	149	0.000306457	0.0214172	0.769,1.0,0.421	1.0,0.869,1.0	-0.226
70115	"ENSG00000153832"	"FBXO36"	chr2	+	229932770	229932886	229922301	229922609	229976240	229976349	70115	0,0,2	10,2,12	2,2,1	2,2,12	265	149	0.0359282	0.499256	0.0,0.0,0.086	0.36,0.36,0.045	-0.226
5148	"ENSG00000129667"	"RHBDF2"	chr17	-	76488014	76488132	76487711	76487909	76500935	76501371	5148	0,0,6	3,14,20	4,2,4	3,12,5	267	149	0.0404052	0.538264	0.0,0.0,0.143	0.427,0.085,0.309	-0.226
6936	"ENSG00000074755"	"ZZEF1"	chr17	-	4056215	4056345	4054056	4054195	4057993	4058155	6936	9,4,7	0,0,8	13,7,12	0,0,0	279	149	0.00704878	0.180932	1.0,1.0,0.318	1.0,1.0,1.0	-0.227
51114	"ENSG00000137055"	"PLAA"	chr9	-	26917096	26917165	26916455	26916705	26919309	26919461	51114	6,5,7	0,1,4	10,18,6	0,0,0	218	149	0.00804801	0.197648	1.0,0.774,0.545	1.0,1.0,1.0	-0.227
16781	"ENSG00000155256"	"ZFYVE27"	chr10	+	97743093	97743164	97738476	97738674	97744728	97744915	16781	14,15,14	2,2,5	6,17,20	0,0,0	220	149	3.66303e-06	0.00109682	0.826,0.836,0.655	1.0,1.0,1.0	-0.228
6129	"ENSG00000067191"	"CACNB1"	chr17	-	39185130	39185150	39184783	39184864	39186495	39186572	6129	0,0,0	1,18,9	2,0,5	9,2,4	169	149	0.000359299	0.0238082	0.0,0.0,0.0	0.164,0.0,0.524	-0.229
30891	"ENSG00000166526"	"ZNF3"	chr7	-	100077302	100077433	100075229	100075630	100081634	100081711	30891	3,6,6	0,0,7	6,11,10	0,0,0	280	149	0.00944284	0.219665	1.0,1.0,0.313	1.0,1.0,1.0	-0.229
37400	"ENSG00000086730"	"LAT2"	chr7	+	74214821	74215010	74209930	74210088	74215946	74216069	37400	5,23,12	8,20,33	11,23,38	11,15,9	298	149	0.00870834	0.208012	0.238,0.365,0.154	0.333,0.434,0.679	-0.23
45253	"ENSG00000239779"	"WBP1"	chr2	+	74458831	74459117	74458471	74458671	74459477	74459562	45253	5,13,16	1,1,3	10,4,12	0,0,0	298	149	0.00860732	0.206982	0.714,0.867,0.727	1.0,1.0,1.0	-0.231
20212	"ENSG00000165757"	"JCAD"	chr10	-	30026102	30029866	30012802	30017917	30047531	30047871	20212	10,21,9	3,0,3	7,23,10	0,1,0	298	149	0.00134265	0.0611228	0.625,1.0,0.6	1.0,0.92,1.0	-0.232
62735	"ENSG00000119688"	"ABCD4"	chr14	-	74299547	74299675	74296332	74296449	74300149	74300268	62735	4,10,7	1,2,2	5,6,7	0,1,0	277	149	0.000518126	0.0315299	0.683,0.729,0.653	1.0,0.763,1.0	-0.233
29924	"ENSG00000197782"	"ZNF780A"	chr19	-	40090165	40090235	40084744	40084798	40090905	40090938	29924	9,18,19	2,2,6	10,12,14	0,0,0	219	149	2.52493e-06	0.000848526	0.754,0.86,0.683	1.0,1.0,1.0	-0.234
65503	"ENSG00000121716"	"PILRB"	chr7	+	100353894	100354012	100353372	100353483	100355142	100355240	65503	10,6,12	1,7,0	7,9,13	0,0,1	267	149	0.00159488	0.0687594	0.848,0.324,1.0	1.0,1.0,0.879	-0.236
21600	"ENSG00000099849"	"RASSF7"	chr11	+	563395	563478	563188	563317	563557	564025	21600	23,13,28	2,10,16	25,26,42	0,9,2	232	149	0.0136359	0.276322	0.881,0.455,0.529	1.0,0.65,0.931	-0.239
34374	"ENSG00000071205"	"ARHGAP10"	chr4	+	148063147	148063300	148046891	148047051	148064415	148064507	34374	12,22,49	16,17,12	30,64,63	13,9,11	298	149	0.0171179	0.316708	0.273,0.393,0.671	0.536,0.78,0.741	-0.24
70147	"ENSG00000147586"	"MRPS28"	chr8	-	80028694	80028796	80002998	80003180	80029760	80029912	70147	2,2,1	0,6,5	0,5,2	1,0,0	251	149	0.000411536	0.0263427	1.0,0.165,0.106	0.0,1.0,1.0	-0.243
71841	"ENSG00000163249"	"CCNYL1"	chr2	+	207740654	207740706	207737410	207737446	207742222	207742342	71841	9,8,5	3,8,0	4,12,8	0,0,1	201	149	7.17259e-05	0.00875938	0.69,0.426,1.0	1.0,1.0,0.856	-0.247
65987	"ENSG00000197467"	"COL13A1"	chr10	+	69932559	69932604	69930399	69930552	69936755	69936782	65987	1,8,4	0,6,1	6,14,3	0,0,0	194	149	0.000119634	0.0118449	1.0,0.506,0.754	1.0,1.0,1.0	-0.247
7787	"ENSG00000159593"	"NAE1"	chr16	-	66826667	66826780	66826522	66826583	66830846	66830976	7787	6,15,5	6,1,0	15,18,11	0,0,0	262	149	0.00109037	0.0527237	0.363,0.895,1.0	1.0,1.0,1.0	-0.247
69752	"ENSG00000120925"	"RNF170"	chr8	-	42865415	42865489	42861329	42861855	42870003	42870112	69752	0,7,9	2,2,0	2,10,8	1,1,0	223	149	0.0361248	0.500626	0.0,0.7,1.0	0.572,0.87,1.0	-0.247
10172	"ENSG00000137857"	"DUOX1"	chr15	+	45141927	45142112	45141291	45141410	45143189	45143303	10172	6,9,3	0,2,4	1,10,10	0,0,2	298	149	0.00192676	0.0771714	1.0,0.692,0.273	1.0,1.0,0.714	-0.25
35959	"ENSG00000009780"	"FAM76A"	chr1	+	27749067	27749154	27744653	27744811	27755194	27755330	35959	0,2,9	4,3,1	14,0,10	1,1,0	236	149	0.00204409	0.0794156	0.0,0.296,0.85	0.898,0.0,1.0	-0.251
61815	"ENSG00000112234"	"FBXL4"	chr6	-	98880552	98880624	98875414	98875727	98899267	98899481	61815	3,3,2	0,2,2	7,4,3	0,0,1	221	149	0.0211275	0.361099	1.0,0.503,0.403	1.0,1.0,0.669	-0.254
69519	"ENSG00000197892"	"KIF13B"	chr8	-	29075280	29075343	29071619	29072316	29092744	29092878	69519	6,7,5	3,5,6	7,13,12	3,4,1	212	149	0.0272308	0.421831	0.584,0.496,0.369	0.621,0.696,0.894	-0.254
30204	"ENSG00000134077"	"THUMPD3"	chr3	+	9377818	9377888	9374515	9374646	9383198	9383309	30204	30,13,12	6,9,10	29,26,12	7,3,1	219	149	0.0129688	0.267501	0.773,0.496,0.449	0.738,0.855,0.891	-0.255
70180	"ENSG00000174669"	"SLC29A2"	chr11	-	66369059	66369131	66368536	66368671	66369368	66369532	70180	10,21,9	4,3,12	14,11,11	0,0,6	221	149	0.0291044	0.439787	0.628,0.825,0.336	1.0,1.0,0.553	-0.255
29354	"ENSG00000180902"	"D2HGDH"	chr2	+	241755848	241756014	241744708	241744877	241767709	241767948	29354	21,40,23	5,5,9	50,46,19	6,0,0	298	149	0.000710485	0.0394148	0.677,0.8,0.561	0.806,1.0,1.0	-0.256
9793	"ENSG00000129007"	"CALML4"	chr15	-	68199540	68199681	68197439	68197628	68205120	68205151	9793	10,3,0	0,2,2	1,1,1	2,0,0	290	149	0.0298626	0.446528	1.0,0.435,0.0	0.204,1.0,1.0	-0.256
37650	"ENSG00000176261"	"ZBTB8OS"	chr1	-	32634767	32634792	32633950	32634110	32650401	32650525	37650	15,4,5	9,2,0	12,7,5	0,0,0	174	149	5.21081e-06	0.00142331	0.588,0.631,1.0	1.0,1.0,1.0	-0.26
36049	"ENSG00000119185"	"ITGB1BP1"	chr2	-	9419989	9420100	9418625	9418732	9422965	9423176	36049	2,10,9	1,0,6	6,5,15	1,0,0	260	149	0.00097657	0.0490093	0.534,1.0,0.462	0.775,1.0,1.0	-0.26
47952	"ENSG00000158806"	"NPM2"	chr8	+	22024723	22024830	22024133	22024623	22025215	22025306	47952	2,10,11	3,1,1	2,7,6	0,0,1	256	149	0.0052044	0.148663	0.28,0.853,0.865	1.0,1.0,0.777	-0.26
65096	"ENSG00000006576"	"PHTF2"	chr7	+	77937709	77937838	77929108	77929327	77940029	77940302	65096	7,2,17	17,11,7	12,4,10	3,3,5	278	149	0.0261411	0.412076	0.181,0.089,0.566	0.682,0.417,0.517	-0.26
21076	"ENSG00000148925"	"BTBD10"	chr11	-	13445023	13445181	13421641	13421838	13463091	13463222	21076	5,8,12	10,12,14	9,24,13	2,11,14	298	149	0.0264857	0.415455	0.2,0.25,0.3	0.692,0.522,0.317	-0.26
36287	"ENSG00000099785"	"MARCHF2"	chr19	+	8418741	8418807	8413294	8413420	8426608	8426673	36287	3,6,3	0,2,15	3,7,2	0,0,1	215	149	0.000159583	0.0141692	1.0,0.675,0.122	1.0,1.0,0.581	-0.261
47965	"ENSG00000145730"	"PAM"	chr5	+	103025130	103025334	103019789	103019843	103028181	103028222	47965	41,83,149	27,39,40	55,102,144	0,14,47	298	149	0.0029264	0.101356	0.432,0.516,0.651	1.0,0.785,0.605	-0.264
69502	"ENSG00000012232"	"EXTL3"	chr8	+	28637301	28637429	28622760	28622810	28713456	28713550	69502	3,1,0	2,22,17	0,4,5	6,6,0	277	149	0.0466817	0.589163	0.447,0.024,0.0	0.0,0.264,1.0	-0.264
16539	"ENSG00000107957"	"SH3PXD2A"	chr10	-	103622469	103622553	103617196	103617314	103627088	103627202	16539	13,11,5	2,1,4	18,13,2	1,0,0	233	149	0.000171485	0.0147502	0.806,0.876,0.444	0.92,1.0,1.0	-0.265
71219	"ENSG00000185189"	"NRBP2"	chr8	-	143835819	143835875	143833582	143835730	143835966	143836030	71219	6,15,5	0,5,5	13,22,11	1,0,0	205	149	3.1636e-05	0.00498679	1.0,0.686,0.421	0.904,1.0,1.0	-0.266
52918	"ENSG00000178188"	"SH2B1"	chr16	+	28866011	28867033	28863667	28863754	28867373	28867432	52918	7,12,9	2,3,3	14,6,15	3,0,0	298	149	0.00622622	0.168167	0.636,0.667,0.6	0.7,1.0,1.0	-0.266
49468	"ENSG00000119844"	"AFTPH"	chr2	+	64551442	64553409	64524304	64524612	64567561	64567713	49468	4,6,14	1,1,2	14,27,14	0,0,0	298	149	0.0236251	0.386425	0.667,0.75,0.778	1.0,1.0,1.0	-0.268
20392	"ENSG00000173065"	"FAM222B"	chr17	-	28790377	28790425	28766585	28766707	28834292	28834326	20392	0,2,0	5,3,7	1,4,6	9,5,2	197	149	0.000825663	0.0438988	0.0,0.335,0.0	0.078,0.377,0.694	-0.271
42511	"ENSG00000227232"	"WASH7P"	chr1	-	17232	17368	16857	17055	17605	17742	42511	20,22,23	4,9,5	23,61,16	0,0,2	285	149	1.98218e-07	0.000161196	0.723,0.561,0.706	1.0,1.0,0.807	-0.272
4140	"ENSG00000101266"	"CSNK2A1"	chr20	-	527932	528049	505117	505229	543671	543712	4140	19,7,11	3,1,4	8,8,18	0,0,0	266	149	3.85931e-06	0.00114127	0.78,0.797,0.606	1.0,1.0,1.0	-0.272
41599	"ENSG00000125386"	"FAM193A"	chr4	+	2689505	2689704	2672120	2672372	2690697	2690970	41599	9,9,16	2,2,2	6,9,13	0,0,0	298	149	0.000267606	0.0196622	0.692,0.692,0.8	1.0,1.0,1.0	-0.272
30039	"ENSG00000072195"	"SPEG"	chr2	+	219444029	219444059	219443107	219443150	219444652	219444742	30039	8,31,55	9,5,15	44,35,59	0,0,10	179	149	0.000614865	0.0357741	0.425,0.838,0.753	1.0,1.0,0.831	-0.272
22436	"ENSG00000157657"	"ZNF618"	chr9	+	114028732	114028972	114016694	114016784	114032647	114032724	22436	14,19,10	4,4,9	16,17,20	0,4,2	298	149	0.0124768	0.261261	0.636,0.704,0.357	1.0,0.68,0.833	-0.272
22113	"ENSG00000106976"	"DNM1"	chr9	+	128253100	128253137	128250724	128250940	128254005	128254162	22113	2,0,1	1,2,5	5,0,4	3,2,0	186	149	0.0283076	0.433131	0.616,0.0,0.138	0.572,0.0,1.0	-0.273
5566	"ENSG00000108395"	"TRIM37"	chr17	-	59001597	59001741	58999380	58999459	59012327	59012446	5566	12,7,4	5,3,3	20,10,10	0,11,0	293	149	0.0407298	0.541171	0.55,0.543,0.404	1.0,0.316,1.0	-0.273
52026	"ENSG00000243943"	"ZNF512"	chr2	+	27583657	27583716	27582968	27583142	27598066	27598254	52026	8,2,6	4,1,0	4,2,7	0,0,0	208	149	0.00851082	0.205621	0.589,0.589,1.0	1.0,1.0,1.0	-0.274
52418	"ENSG00000011566"	"MAP4K3"	chr2	-	39307942	39308005	39299742	39299801	39309460	39309519	52418	6,3,2	6,3,0	1,8,3	0,3,0	212	149	0.0247397	0.39768	0.413,0.413,1.0	1.0,0.652,1.0	-0.275
54201	"ENSG00000170088"	"TMEM192"	chr4	-	165100627	165100892	165088467	165088602	165102949	165103096	54201	22,23,9	0,4,6	12,18,13	0,0,0	298	149	1.12431e-05	0.00242351	1.0,0.742,0.429	1.0,1.0,1.0	-0.276
25583	"ENSG00000143498"	"TAF1A"	chr1	-	222579758	222579872	222577444	222577643	222584127	222584297	25583	25,11,3	2,0,8	27,14,2	0,1,0	263	149	0.00122966	0.0573662	0.876,1.0,0.175	1.0,0.888,1.0	-0.279
44760	"ENSG00000247498"	"GPRC5D-AS1"	chr12	+	12966758	12966897	12927763	12927803	12979430	12979622	44760	1,5,2	2,2,0	2,1,3	0,0,1	288	149	0.0105916	0.23525	0.206,0.564,1.0	1.0,1.0,0.608	-0.279
10759	"ENSG00000126214"	"KLC1"	chr14	+	103693552	103693634	103692358	103692425	103700654	103700727	10759	4,19,11	1,8,6	11,14,25	0,2,2	231	149	0.000380173	0.0249603	0.721,0.605,0.542	1.0,0.819,0.89	-0.28
2942	"ENSG00000197961"	"ZNF121"	chr19	-	9584185	9584348	9569001	9569082	9584460	9584497	2942	0,0,0	5,5,1	8,3,0	2,7,5	298	149	0.000159374	0.0141692	0.0,0.0,0.0	0.667,0.176,0.0	-0.281
2743	"ENSG00000130165"	"ELOF1"	chr19	-	11555173	11555253	11554231	11554365	11555344	11555467	2743	31,22,14	14,9,14	21,34,31	5,7,1	229	149	0.00090521	0.0464281	0.59,0.614,0.394	0.732,0.76,0.953	-0.282
25730	"ENSG00000154310"	"TNIK"	chr3	-	171107182	171107206	171101448	171101633	171108064	171108162	25730	1,0,0	4,8,6	4,2,1	1,8,11	173	149	0.00120655	0.056583	0.177,0.0,0.0	0.775,0.177,0.073	-0.283
57862	"ENSG00000163689"	"CFAP20DC"	chr3	-	58913707	58913864	58884544	58884709	58937647	58937762	57862	1,4,0	0,3,2	3,4,4	0,0,6	298	149	0.0187825	0.334365	1.0,0.4,0.0	1.0,1.0,0.25	-0.283
25132	"ENSG00000175920"	"DOK7"	chr4	+	3485538	3485658	3476341	3476542	3489676	3489796	25132	5,10,7	2,0,3	23,14,2	0,0,0	269	149	0.00420365	0.129892	0.581,1.0,0.564	1.0,1.0,1.0	-0.285
68232	"ENSG00000133519"	"ZDHHC8P1"	chr22	-	23393925	23394057	23391376	23391724	23399759	23400583	68232	0,0,0	2,2,5	0,5,2	7,1,7	281	149	0.00514161	0.147773	0.0,0.0,0.0	0.0,0.726,0.132	-0.286
11648	"ENSG00000130751"	"NPAS1"	chr19	+	47039406	47039564	47035859	47036129	47040443	47040550	11648	14,10,9	7,16,0	14,9,3	0,3,0	298	149	0.00992172	0.226683	0.5,0.238,1.0	1.0,0.6,1.0	-0.287
40700	"ENSG00000144674"	"GOLGA4"	chr3	+	37361242	37361305	37355100	37355187	37366079	37366751	40700	21,7,5	7,5,6	13,18,10	5,4,0	212	149	0.0388236	0.525598	0.678,0.496,0.369	0.646,0.76,1.0	-0.288
18867	"ENSG00000182718"	"ANXA2"	chr15	-	60390212	60390317	60386027	60386086	60398644	60398742	18867	6,5,4	1,1,9	11,13,19	1,1,2	254	149	0.0129706	0.267501	0.779,0.746,0.207	0.866,0.884,0.848	-0.289
41468	"ENSG00000162408"	"NOL9"	chr1	-	6541829	6541927	6533279	6533441	6549570	6549698	41468	5,3,7	1,3,0	3,7,9	0,0,0	247	149	0.0453065	0.579399	0.751,0.376,1.0	1.0,1.0,1.0	-0.291
68720	"ENSG00000121073"	"SLC35B1"	chr17	-	49707342	49707444	49706964	49707068	49708075	49708163	68720	0,3,1	5,3,3	4,3,13	2,5,5	251	149	0.00579026	0.159743	0.0,0.372,0.165	0.543,0.263,0.607	-0.292
37598	"ENSG00000185808"	"PIGP"	chr21	-	37072144	37072310	37067261	37067380	37072433	37072537	37598	9,14,9	6,0,2	5,9,6	0,0,0	298	149	2.62618e-05	0.00437069	0.429,1.0,0.692	1.0,1.0,1.0	-0.293
65176	"ENSG00000164659"	"ELAPOR2"	chr7	-	86964903	86965024	86947726	86947922	87059324	87059631	65176	1,2,5	4,0,0	9,3,1	0,0,0	270	149	0.045087	0.577831	0.121,1.0,1.0	1.0,1.0,1.0	-0.293
44109	"ENSG00000134744"	"TUT4"	chr1	-	52481422	52481635	52477707	52477882	52481803	52481923	44109	13,6,14	4,0,7	2,9,9	0,0,0	298	149	1.08215e-06	0.000480876	0.619,1.0,0.5	1.0,1.0,1.0	-0.294
1365	"ENSG00000170906"	"NDUFA3"	chr19	+	54105596	54105703	54103113	54103188	54106810	54106961	1365	16,3,0	14,0,18	21,3,12	0,0,18	256	149	0.0202018	0.350563	0.399,1.0,0.0	1.0,1.0,0.28	-0.294
41116	"ENSG00000130714"	"POMT1"	chr9	+	131504188	131504340	131502917	131503073	131506402	131506453	41116	4,14,10	3,0,2	4,5,17	0,0,0	298	149	0.00453948	0.137008	0.4,1.0,0.714	1.0,1.0,1.0	-0.295
13160	"ENSG00000102743"	"SLC25A15"	chr13	+	40807293	40807463	40805117	40805255	40808437	40808470	13160	11,10,7	1,4,8	16,23,17	0,2,3	298	149	0.00818413	0.199757	0.846,0.556,0.304	1.0,0.852,0.739	-0.295
50236	"ENSG00000175764"	"TTLL11"	chr9	-	122031722	122031856	121988909	121989770	122039271	122039368	50236	1,6,1	0,0,4	9,5,1	0,0,0	283	149	0.0430445	0.561792	1.0,1.0,0.116	1.0,1.0,1.0	-0.295
53018	"ENSG00000143882"	"ATP6V1C2"	chr2	+	10757426	10757456	10753980	10754066	10764330	10764425	53018	0,0,0	3,7,8	0,7,1	5,2,5	179	149	0.00258074	0.0925292	0.0,0.0,0.0	0.0,0.744,0.143	-0.296
62159	"ENSG00000111877"	"MCM9"	chr6	-	118856370	118856545	118829047	118829250	118894026	118894356	62159	6,7,4	0,1,4	8,2,20	0,0,0	298	149	0.00452972	0.136894	1.0,0.778,0.333	1.0,1.0,1.0	-0.296
30830	"ENSG00000188833"	"ENTPD8"	chr9	-	137435718	137435829	137435203	137435338	137436012	137436276	30830	7,3,8	7,10,1	2,3,14	0,6,0	260	149	0.0367108	0.505808	0.364,0.147,0.821	1.0,0.223,1.0	-0.297
24665	"ENSG00000109689"	"STIM2"	chr4	+	27007982	27008006	27007532	27007700	27008427	27008528	24665	1,0,0	7,4,8	0,0,5	8,9,0	173	149	0.0439099	0.568857	0.11,0.0,0.0	0.0,0.0,1.0	-0.297
50935	"ENSG00000163125"	"RPRD2"	chr1	+	150441880	150441958	150440922	150441023	150443230	150443283	50935	8,7,1	8,2,2	4,9,5	3,0,1	227	149	0.0397405	0.531586	0.396,0.697,0.247	0.467,1.0,0.766	-0.298
4863	"ENSG00000176155"	"CCDC57"	chr17	-	82179026	82179189	82178473	82178605	82183773	82183932	4863	5,9,22	4,0,8	24,18,26	0,0,2	298	149	0.00011295	0.0114169	0.385,1.0,0.579	1.0,1.0,0.867	-0.301
6500	"ENSG00000108641"	"B9D1"	chr17	-	19371548	19371633	19360320	19360388	19377858	19377897	6500	3,4,3	0,4,4	7,5,1	0,2,0	234	149	0.00156968	0.0684121	1.0,0.389,0.323	1.0,0.614,1.0	-0.301
37277	"ENSG00000065665"	"SEC61A2"	chr10	+	12149851	12149961	12149594	12149726	12156906	12157067	37277	5,8,15	2,3,1	8,6,8	0,0,0	259	149	0.000356326	0.023655	0.59,0.605,0.896	1.0,1.0,1.0	-0.303
6694	"ENSG00000178999"	"AURKB"	chr17	-	8209953	8210055	8207737	8207901	8210176	8210254	6694	0,6,1	6,3,0	4,5,1	1,1,0	251	149	0.000482353	0.029701	0.0,0.543,1.0	0.704,0.748,1.0	-0.303
9586	"ENSG00000198794"	"SCAMP5"	chr15	+	75009890	75009940	74995541	74995673	75011791	75011846	9586	0,0,0	17,7,10	10,1,0	8,1,6	199	149	4.10862e-05	0.00590155	0.0,0.0,0.0	0.483,0.428,0.0	-0.304
30354	"ENSG00000171045"	"TSNARE1"	chr8	-	142318543	142318634	142300115	142300644	142330900	142330970	30354	4,7,19	3,6,0	11,9,12	0,0,2	240	149	0.000906568	0.0464281	0.453,0.42,1.0	1.0,1.0,0.788	-0.305
41443	"ENSG00000164031"	"DNAJB14"	chr4	-	99924759	99924815	99923039	99923185	99930449	99930621	41443	0,0,5	2,1,0	4,2,3	2,3,0	205	149	0.0410651	0.544218	0.0,0.0,1.0	0.592,0.326,1.0	-0.306
21801	"ENSG00000165689"	"ENTR1"	chr9	-	136410089	136410239	136408998	136409067	136410327	136410609	21801	12,25,42	6,32,5	17,18,29	4,0,3	298	149	0.0075752	0.190081	0.5,0.281,0.808	0.68,1.0,0.829	-0.307
49209	"ENSG00000174567"	"GOLT1A"	chr1	-	204201632	204201811	204198162	204198496	204213881	204213988	49209	0,7,10	2,2,0	4,5,2	0,2,0	298	149	0.0260728	0.411893	0.0,0.636,1.0	1.0,0.556,1.0	-0.307
69270	"ENSG00000078674"	"PCM1"	chr8	+	17934705	17934858	17924712	17924780	17935588	17935706	69270	0,0,0	7,6,3	2,8,0	7,1,2	298	149	0.00166667	0.0705759	0.0,0.0,0.0	0.125,0.8,0.0	-0.308
68545	"ENSG00000116138"	"DNAJC16"	chr1	+	15529087	15529272	15526812	15526958	15534236	15534303	68545	6,1,20	0,6,0	7,13,5	0,0,0	298	149	0.0201815	0.350381	1.0,0.077,1.0	1.0,1.0,1.0	-0.308
36343	"ENSG00000215908"	"CROCCP2"	chr1	-	16619844	16620245	16618255	16619103	16625774	16626005	36343	4,9,17	0,7,4	7,12,8	0,0,0	298	149	1.84975e-06	0.000703809	1.0,0.391,0.68	1.0,1.0,1.0	-0.31
19101	"ENSG00000033327"	"GAB2"	chr11	-	78250156	78250400	78226464	78227051	78280600	78280901	19101	4,15,21	2,2,3	4,7,23	0,0,0	298	149	4.92264e-05	0.00669742	0.5,0.789,0.778	1.0,1.0,1.0	-0.311
25293	"ENSG00000145107"	"TM4SF19"	chr3	-	196326954	196327032	196324270	196324440	196327389	196327591	25293	1,4,6	0,2,4	3,2,1	0,0,0	227	149	0.000146175	0.0136209	1.0,0.568,0.496	1.0,1.0,1.0	-0.312
42758	"ENSG00000085999"	"RAD54L"	chr1	+	46248317	46248408	46247699	46247746	46248511	46248598	42758	8,18,4	8,2,2	22,9,12	2,1,0	240	149	0.000774804	0.0420061	0.383,0.848,0.554	0.872,0.848,1.0	-0.312
28568	"ENSG00000183873"	"SCN5A"	chr3	-	38579333	38579492	38576660	38576781	38580930	38581371	28568	0,2,0	2,1,2	5,15,3	3,4,3	298	149	0.000244087	0.0185364	0.0,0.5,0.0	0.455,0.652,0.333	-0.313
70084	"ENSG00000008513"	"ST3GAL1"	chr8	-	133499134	133499189	133475718	133476600	133545773	133545926	70084	14,8,10	0,6,7	13,6,24	0,0,1	204	149	8.64692e-06	0.00196402	1.0,0.493,0.511	1.0,1.0,0.946	-0.314
17687	"ENSG00000095794"	"CREM"	chr10	+	35188199	35188388	35179133	35179276	35206894	35207006	17687	0,1,1	10,3,2	2,12,2	7,0,5	298	149	0.000563014	0.0334092	0.0,0.143,0.2	0.125,1.0,0.167	-0.316
60171	"ENSG00000204540"	"PSORS1C1"	chr6	+	31129568	31129645	31114772	31114891	31139640	31140092	60171	0,0,2	8,26,6	2,9,0	9,0,21	226	149	0.00647215	0.172183	0.0,0.0,0.18	0.128,1.0,0.0	-0.316
52252	"ENSG00000267952"	"AC008878"	chr19	+	7513879	7514005	7507051	7507141	7519204	7519622	52252	7,5,5	19,4,0	2,5,3	1,0,0	275	149	7.82033e-05	0.0092658	0.166,0.404,1.0	0.52,1.0,1.0	-0.317
30837	"ENSG00000070159"	"PTPN3"	chr9	-	109422717	109422852	109420423	109420600	109426949	109427122	30837	13,20,21	5,18,19	26,24,27	0,6,10	284	149	0.00258349	0.0925351	0.577,0.368,0.367	1.0,0.677,0.586	-0.317
36585	"ENSG00000130429"	"ARPC1B"	chr7	+	99377337	99377439	99374729	99374781	99385701	99385778	36585	78,92,143	535,803,1115	73,121,113	0,681,875	251	149	0.00928855	0.217089	0.08,0.064,0.071	1.0,0.095,0.071	-0.317
63136	"ENSG00000184465"	"WDR27"	chr6	-	169694462	169695065	169689126	169689308	169701550	169701854	63136	1,5,0	1,1,6	0,3,7	2,0,0	298	149	0.00767175	0.191163	0.333,0.714,0.0	0.0,1.0,1.0	-0.318
21650	"ENSG00000142082"	"SIRT3"	chr11	-	233910	234004	233342	233534	236193	236354	21650	1,2,3	4,17,10	6,2,3	3,2,3	243	149	0.00139332	0.0627117	0.133,0.067,0.155	0.551,0.38,0.38	-0.319
22258	"ENSG00000166167"	"BTRC"	chr10	+	101430344	101430452	101354032	101354228	101461980	101462058	22258	12,9,26	4,6,10	7,20,11	0,6,0	257	149	0.0122438	0.25815	0.635,0.465,0.601	1.0,0.659,1.0	-0.319
49490	"ENSG00000130508"	"PXDN"	chr2	-	1687631	1687703	1684079	1684151	1691927	1691999	49490	0,10,18	4,1,1	7,11,21	0,1,2	221	149	0.0335161	0.47856	0.0,0.871,0.924	1.0,0.881,0.876	-0.321
32121	"ENSG00000257433"	"AC004241"	chr12	+	47717491	47717636	47706084	47706163	47719146	47719272	32121	2,0,2	7,6,5	7,1,1	1,1,3	294	149	0.01822	0.3296	0.126,0.0,0.169	0.78,0.336,0.145	-0.322
43480	"ENSG00000140199"	"SLC12A6"	chr15	-	34257641	34257788	34256228	34256283	34258812	34258944	43480	1,6,11	3,2,0	4,4,5	0,0,1	296	149	0.00185652	0.0753833	0.144,0.602,1.0	1.0,1.0,0.716	-0.323
31848	"ENSG00000163093"	"BBS5"	chr2	+	169497626	169497689	169493740	169493836	169499485	169499620	31848	0,1,2	3,1,2	0,6,5	1,1,0	212	149	0.00032602	0.0223223	0.0,0.413,0.413	0.0,0.808,1.0	-0.327
11458	"ENSG00000100271"	"TTLL1"	chr22	-	43070170	43070242	43069603	43069844	43075473	43075590	11458	0,1,0	17,12,18	0,1,6	15,19,0	221	149	0.0256508	0.407384	0.0,0.053,0.0	0.0,0.034,1.0	-0.327
67632	"ENSG00000162341"	"TPCN2"	chr11	+	69055174	69055352	69054032	69054097	69057577	69057694	67632	2,0,0	0,2,4	11,5,3	0,2,2	298	149	0.000787541	0.042312	1.0,0.0,0.0	1.0,0.556,0.429	-0.328
41642	"ENSG00000221983"	"UBA52"	chr19	+	18572350	18572607	18571854	18571887	18573292	18573403	41642	267,178,141	3059,3123,3146	381,199,134	4582,2639,0	298	149	0.00244621	0.0891646	0.042,0.028,0.022	0.04,0.036,1.0	-0.328
37104	"ENSG00000275778"	"AC018630"	chr12	-	10882216	10882698	10848371	10848407	10973654	10973721	37104	0,2,1	3,3,0	5,1,2	8,0,0	298	149	0.0183231	0.330418	0.0,0.25,1.0	0.238,1.0,1.0	-0.329
7224	"ENSG00000051523"	"CYBA"	chr16	-	88646754	88646838	88643288	88643571	88650955	88651015	7224	10,4,2	1,3,3	5,3,8	2,0,0	233	149	0.00135397	0.0613548	0.865,0.46,0.299	0.615,1.0,1.0	-0.33
14404	"ENSG00000186908"	"ZDHHC17"	chr12	+	76797433	76797537	76763587	76764329	76805316	76805439	14404	7,6,2	0,2,2	7,9,3	0,0,0	253	149	0.0356492	0.496377	1.0,0.639,0.371	1.0,1.0,1.0	-0.33
22348	"ENSG00000225151"	"GOLGA2P7"	chr15	-	84205230	84205319	84204786	84204975	84229851	84230136	22348	16,14,15	9,6,6	55,22,25	1,0,5	238	149	5.44962e-06	0.00146615	0.527,0.594,0.61	0.972,1.0,0.758	-0.333
52718	"ENSG00000205133"	"TRIQK"	chr8	-	92921502	92921660	92916928	92917010	92954405	92954564	52718	2,0,0	0,2,7	3,2,0	0,0,1	298	149	0.000118366	0.0117977	1.0,0.0,0.0	1.0,1.0,0.0	-0.333
6147	"ENSG00000277363"	"SRCIN1"	chr17	-	38568210	38568234	38564117	38564313	38572667	38572820	6147	2,0,4	0,4,4	1,3,1	0,0,1	173	149	0.000284777	0.0203502	1.0,0.0,0.463	1.0,1.0,0.463	-0.333
47117	"ENSG00000152061"	"RABGAP1L"	chr1	+	174988640	174988838	174982833	174982905	174989848	174990341	47117	5,7,0	0,0,6	2,4,5	0,0,0	298	149	0.0160213	0.303012	1.0,1.0,0.0	1.0,1.0,1.0	-0.333
20056	"ENSG00000134780"	"DAGLA"	chr11	+	61720678	61720867	61720111	61720250	61722858	61722960	20056	0,5,9	6,0,0	2,1,5	0,0,0	298	149	0.016022	0.303012	0.0,1.0,1.0	1.0,1.0,1.0	-0.333
28090	"ENSG00000164081"	"TEX264"	chr3	+	51672209	51672301	51671174	51671288	51674270	51674562	28090	9,8,8	30,42,62	19,16,5	0,35,24	241	149	0.0160551	0.303319	0.156,0.105,0.074	1.0,0.22,0.114	-0.333
10828	"ENSG00000128242"	"GAL3ST1"	chr22	-	30558259	30558388	30557261	30557401	30560740	30560759	10828	2,1,0	0,0,5	1,1,5	0,0,0	278	149	0.0221137	0.370505	1.0,1.0,0.0	1.0,1.0,1.0	-0.333
17457	"ENSG00000204147"	"ASAH2B"	chr10	+	50745127	50745274	50742914	50743010	50749342	50749402	17457	4,1,0	0,0,4	2,5,2	0,0,0	296	149	0.0293987	0.442162	1.0,1.0,0.0	1.0,1.0,1.0	-0.333
60029	"ENSG00000010626"	"LRRC23"	chr12	+	6909889	6910026	6906408	6906662	6913890	6914228	60029	0,12,11	4,0,0	10,4,4	0,0,0	286	149	0.0304113	0.452089	0.0,1.0,1.0	1.0,1.0,1.0	-0.333
59467	"ENSG00000137434"	"C6orf52"	chr6	-	10687479	10687561	10686965	10687164	10694493	10694533	59467	0,0,7	5,4,0	3,1,0	0,0,3	231	149	0.0331406	0.475285	0.0,0.0,1.0	1.0,1.0,0.0	-0.333
40304	"ENSG00000146556"	"WASH2P"	chr2	+	113595062	113595161	113588549	113588703	113595368	113595515	40304	0,8,14	4,0,0	21,16,14	0,0,0	248	149	0.0350309	0.492331	0.0,1.0,1.0	1.0,1.0,1.0	-0.333
14043	"ENSG00000076555"	"ACACB"	chr12	+	109247605	109247703	109246178	109246448	109249983	109250104	14043	8,19,0	0,0,4	5,12,22	0,0,0	247	149	0.035159	0.492776	1.0,1.0,0.0	1.0,1.0,1.0	-0.333
56747	"ENSG00000219481"	"NBPF1"	chr1	-	16594930	16595013	16594591	16594661	16608507	16608650	56747	0,7,7	4,0,0	6,3,1	0,0,0	232	149	0.0374393	0.513081	0.0,1.0,1.0	1.0,1.0,1.0	-0.333
27838	"ENSG00000163946"	"TASOR"	chr3	-	56638705	56638765	56633043	56633843	56639985	56640130	27838	4,0,2	0,4,0	8,6,2	0,0,0	209	149	0.0415391	0.548645	1.0,0.0,1.0	1.0,1.0,1.0	-0.333
30552	"ENSG00000171055"	"FEZ2"	chr2	-	36558437	36558513	36555682	36555748	36578596	36578832	30552	1,8,4	0,10,7	5,18,3	2,0,0	225	149	0.000118079	0.0117977	1.0,0.346,0.275	0.623,1.0,1.0	-0.334
46305	"ENSG00000165322"	"ARHGAP12"	chr10	-	31854065	31854206	31852516	31852597	31861394	31861658	46305	22,18,8	19,7,4	30,38,19	8,5,0	290	149	0.000866911	0.0451525	0.373,0.569,0.507	0.658,0.796,1.0	-0.335
68357	"ENSG00000188153"	"COL4A5"	chrX	+	108695266	108695439	108694806	108694921	108696296	108696389	68357	0,4,6	2,1,1	9,3,7	0,2,0	298	149	0.008098	0.198332	0.0,0.667,0.75	1.0,0.429,1.0	-0.337
68401	"ENSG00000272419"	"LINC01145"	chr1	-	145170941	145171185	145168404	145169086	145215638	145215814	68401	1,14,14	4,4,2	4,9,7	0,0,3	298	149	0.0146267	0.287093	0.111,0.636,0.778	1.0,1.0,0.538	-0.338
68220	"ENSG00000198586"	"TLK1"	chr2	-	171081639	171081708	171061080	171061156	171082780	171082852	68220	0,0,1	3,4,9	1,5,0	7,0,10	218	149	0.0196207	0.344319	0.0,0.0,0.071	0.089,1.0,0.0	-0.339
64967	"ENSG00000250988"	"SNHG21"	chr15	+	82756729	82756785	82754628	82754784	82756903	82756939	64967	6,1,3	1,2,3	1,5,3	0,0,2	205	149	0.00210423	0.0809608	0.813,0.267,0.421	1.0,1.0,0.522	-0.34
17206	"ENSG00000090975"	"PITPNM2"	chr12	-	122991754	122991898	122990544	122990709	122992498	122992669	17206	8,11,3	5,8,10	13,5,12	4,1,3	293	149	0.00471607	0.138775	0.449,0.411,0.132	0.623,0.718,0.67	-0.34
58199	"ENSG00000224397"	"PELATON"	chr20	+	50275645	50275735	50267474	50267663	50277490	50277613	58199	2,6,2	2,0,2	7,6,2	0,1,0	239	149	0.0171135	0.316708	0.384,1.0,0.384	1.0,0.789,1.0	-0.34
1838	"ENSG00000167619"	"TMEM145"	chr19	+	42317708	42317881	42316869	42316963	42320316	42320437	1838	2,5,3	4,1,4	15,5,4	4,2,0	298	149	0.0463532	0.587901	0.2,0.714,0.273	0.652,0.556,1.0	-0.34
69479	"ENSG00000115750"	"TAF1B"	chr2	+	9846056	9846186	9845219	9845318	9849372	9849407	69479	0,0,0	12,5,2	2,0,4	1,7,2	279	149	0.00285889	0.0996075	0.0,0.0,0.0	0.516,0.0,0.516	-0.344
59830	"ENSG00000186470"	"BTN3A2"	chr6	+	26368182	26368267	26367974	26368050	26368564	26368912	59830	4,3,0	10,0,3	4,1,1	0,0,2	234	149	0.00284534	0.099232	0.203,1.0,0.0	1.0,1.0,0.241	-0.346
26751	"ENSG00000196428"	"TSC22D2"	chr3	+	150438197	150438354	150411178	150411308	150457075	150457127	26751	1,0,0	2,13,4	2,2,2	4,18,0	298	149	0.0210916	0.360772	0.2,0.0,0.0	0.2,0.053,1.0	-0.351
55663	"ENSG00000060237"	"WNK1"	chr12	+	880720	880999	878211	878361	881691	881789	55663	1,3,3	3,8,9	6,6,12	3,6,3	298	149	0.000813156	0.0434923	0.143,0.158,0.143	0.5,0.333,0.667	-0.352
57837	"ENSG00000134775"	"FHOD3"	chr18	+	36687127	36687178	36681435	36681570	36693208	36693423	57837	0,2,0	2,1,6	2,2,8	1,3,2	200	149	0.000271279	0.0197697	0.0,0.598,0.0	0.598,0.332,0.749	-0.36
55196	"ENSG00000113360"	"DROSHA"	chr5	-	31515453	31515564	31514987	31515219	31526078	31526326	55196	5,9,4	2,3,10	8,14,13	3,0,1	260	149	0.00161734	0.0692247	0.589,0.632,0.186	0.604,1.0,0.882	-0.36
50825	"ENSG00000143702"	"CEP170"	chr1	-	243185778	243186072	243172696	243172846	243186258	243186280	50825	10,8,4	4,1,4	7,1,1	1,0,0	298	149	8.39738e-05	0.00966528	0.556,0.8,0.333	0.778,1.0,1.0	-0.363
24229	"ENSG00000012124"	"CD22"	chr19	+	35332552	35332924	35329211	35329230	35340880	35340950	24229	0,0,1	5,2,4	2,0,3	4,1,0	298	149	0.0241453	0.39129	0.0,0.0,0.111	0.2,0.0,1.0	-0.363
24268	"ENSG00000163322"	"ABRAXAS1"	chr4	-	83483991	83484166	83482153	83482244	83484985	83485103	24268	2,10,8	8,5,5	2,4,5	6,0,0	298	149	0.0393889	0.529059	0.111,0.5,0.444	0.143,1.0,1.0	-0.363
69986	"ENSG00000104218"	"CSPP1"	chr8	+	67193463	67193602	67190649	67190759	67195381	67195593	69986	13,1,5	0,1,5	6,21,3	0,3,0	288	149	0.0271483	0.421623	1.0,0.341,0.341	1.0,0.784,1.0	-0.367
8962	"ENSG00000260807"	"CEROX1"	chr16	-	979600	979763	979024	979110	981144	981293	8962	1,6,4	2,1,2	7,5,12	0,2,0	298	149	0.00184824	0.0753023	0.2,0.75,0.5	1.0,0.556,1.0	-0.369
64595	"ENSG00000198420"	"TCAF1"	chr7	-	143881922	143882099	143876107	143876622	143901960	143902176	64595	3,13,11	17,17,30	14,15,13	17,0,13	298	149	0.0117605	0.252288	0.081,0.277,0.155	0.292,1.0,0.333	-0.371
65757	"ENSG00000196262"	"PPIA"	chr7	+	44799246	44799277	44796679	44796793	44801286	44801624	65757	18,8,17	16,17,15	28,17,13	0,10,3	180	149	0.000245565	0.0185364	0.482,0.28,0.484	1.0,0.585,0.782	-0.374
22262	"ENSG00000224842"	"AL161908"	chr9	-	126609143	126609214	126608277	126608461	126613448	126613699	22262	1,3,6	1,2,1	1,15,7	0,2,0	220	149	0.0313537	0.46036	0.404,0.504,0.803	1.0,0.836,1.0	-0.375
41530	"ENSG00000151276"	"MAGI1"	chr3	-	65375744	65375948	65364852	65364946	65379260	65379554	41530	11,11,9	4,3,7	2,18,22	0,3,0	298	149	0.000150572	0.0138148	0.579,0.647,0.391	1.0,0.75,1.0	-0.378
41058	"ENSG00000237187"	"NR2F1-AS1"	chr5	-	93580466	93580691	93563363	93563463	93581141	93581199	41058	0,1,0	2,3,5	2,1,2	0,4,5	298	149	0.0314601	0.461166	0.0,0.143,0.0	1.0,0.111,0.167	-0.378
5482	"ENSG00000146872"	"TLK2"	chr17	+	62524235	62524331	62523133	62523177	62536169	62536337	5482	6,4,7	4,1,9	11,6,6	0,2,0	245	149	3.45815e-05	0.00529657	0.477,0.709,0.321	1.0,0.646,1.0	-0.38
38198	"ENSG00000204843"	"DCTN1"	chr2	-	74390582	74390728	74383742	74383806	74391793	74391843	38198	2,0,0	0,1,1	1,1,3	3,0,0	295	149	0.00529296	0.150671	1.0,0.0,0.0	0.144,1.0,1.0	-0.381
1704	"ENSG00000125743"	"SNRPD2"	chr19	-	45689232	45689347	45688386	45688566	45690571	45690667	1704	26,34,21	13,13,12	37,40,49	5,0,1	264	149	4.46769e-09	9.08655e-06	0.53,0.596,0.497	0.807,1.0,0.965	-0.383
26827	"ENSG00000223508"	"RPL23AP53"	chr8	-	230803	230907	219289	219417	232128	232231	26827	2,7,7	4,6,5	12,13,3	2,0,2	253	149	0.00185814	0.0753833	0.227,0.407,0.452	0.779,1.0,0.469	-0.387
29203	"ENSG00000214021"	"TTLL3"	chr3	+	9816073	9816202	9813247	9813345	9817644	9817658	29203	3,11,6	3,4,2	4,5,2	0,1,0	278	149	4.12327e-05	0.00590155	0.349,0.596,0.617	1.0,0.728,1.0	-0.389
13740	"ENSG00000135124"	"P2RX4"	chr12	+	121222946	121222962	121222093	121222166	121228532	121228613	13740	1,6,6	9,7,16	7,6,7	1,2,11	165	149	0.0106983	0.236885	0.091,0.436,0.253	0.863,0.73,0.365	-0.393
54254	"ENSG00000181381"	"DDX60L"	chr4	-	168504832	168504965	168492665	168492885	168536547	168536596	54254	3,1,0	6,2,6	5,2,2	3,6,0	282	149	0.0391132	0.526938	0.209,0.209,0.0	0.468,0.15,1.0	-0.4
67656	"ENSG00000124570"	"SERPINB6"	chr6	-	2966399	2966590	2959167	2959342	2968798	2968913	67656	1,1,0	1,0,2	1,7,4	0,3,0	298	149	0.000456963	0.0284366	0.333,1.0,0.0	1.0,0.538,1.0	-0.402
32966	"ENSG00000136731"	"UGGT1"	chr2	+	128156391	128156415	128155488	128155587	128157251	128157346	32966	1,5,2	1,3,3	8,6,4	0,3,0	173	149	0.00282579	0.0986464	0.463,0.589,0.365	1.0,0.633,1.0	-0.405
46550	"ENSG00000139636"	"LMBR1L"	chr12	-	49104718	49104885	49103686	49103813	49106960	49107045	46550	1,0,0	3,2,8	1,5,2	4,0,3	298	149	0.000614148	0.0357741	0.143,0.0,0.0	0.111,1.0,0.25	-0.406
10199	"ENSG00000168781"	"PPIP5K1"	chr15	-	43564866	43564992	43558794	43558932	43568462	43568516	10199	0,13,7	2,2,0	3,6,9	0,0,0	275	149	0.0199942	0.348439	0.0,0.779,1.0	1.0,1.0,1.0	-0.407
28111	"ENSG00000175792"	"RUVBL1"	chr3	-	128082482	128082574	128064777	128065220	128097299	128097496	28111	0,5,2	3,0,8	1,1,2	0,1,0	241	149	5.50254e-05	0.00726423	0.0,1.0,0.134	1.0,0.382,1.0	-0.416
17095	"ENSG00000108175"	"ZMIZ1"	chr10	+	79310923	79311184	79307404	79307571	79312641	79316519	17095	3,12,17	5,10,0	18,13,20	0,1,0	298	149	1.22028e-05	0.0025386	0.231,0.375,1.0	1.0,0.867,1.0	-0.42
15380	"ENSG00000087470"	"DNM1L"	chr12	+	32738263	32738296	32737104	32737161	32740063	32740240	15380	7,5,4	10,7,3	15,10,20	0,4,3	182	149	4.45777e-05	0.00622854	0.364,0.369,0.522	1.0,0.672,0.845	-0.421
46514	"ENSG00000159592"	"GPBP1L1"	chr1	-	45685575	45685620	45660183	45661225	45687982	45688113	46514	0,5,5	5,0,5	5,3,1	0,1,0	194	149	7.36921e-05	0.00884849	0.0,1.0,0.434	1.0,0.697,1.0	-0.421
23783	"ENSG00000138468"	"SENP7"	chr3	-	101417592	101417790	101372007	101372126	101458954	101459052	23783	3,2,3	5,1,0	1,1,1	0,0,0	298	149	0.000328134	0.0223644	0.231,0.5,1.0	1.0,1.0,1.0	-0.423
4054	"ENSG00000089063"	"TMEM230"	chr20	-	5111499	5111605	5109331	5109445	5112742	5113042	4054	1,4,1	12,11,5	3,1,4	3,2,0	255	149	0.0200015	0.348439	0.046,0.175,0.105	0.369,0.226,1.0	-0.423
50583	"ENSG00000162542"	"TMCO4"	chr1	-	19798136	19798215	19787025	19787117	19799173	19799344	50583	3,3,4	4,3,0	6,6,2	0,0,0	228	149	1.05719e-05	0.00233509	0.329,0.395,1.0	1.0,1.0,1.0	-0.425
2770	"ENSG00000100410"	"PHF5A"	chr22	-	41468019	41468147	41467447	41467614	41468601	41468625	2770	2,8,1	3,1,5	5,6,8	0,1,2	277	149	0.00315258	0.106516	0.264,0.811,0.097	1.0,0.763,0.683	-0.425
54327	"ENSG00000166881"	"NEMP1"	chr12	-	57064070	57064185	57063118	57063344	57064645	57064739	54327	5,8,2	1,4,9	7,5,5	2,0,0	264	149	0.000123844	0.0120266	0.738,0.53,0.111	0.664,1.0,1.0	-0.428
66217	"ENSG00000285106"	"AC016831"	chr7	-	130912109	130912152	130881057	130884396	130945719	130945835	66217	1,2,1	2,4,1	3,1,5	0,2,0	192	149	0.000340413	0.0229824	0.28,0.28,0.437	1.0,0.28,1.0	-0.428
39841	"ENSG00000196505"	"GDAP2"	chr1	-	117877775	117877841	117870183	117870616	117878008	117878152	39841	0,0,0	2,14,9	2,0,4	0,4,7	215	149	0.0152823	0.294826	0.0,0.0,0.0	1.0,0.0,0.284	-0.428
14877	"ENSG00000123415"	"SMUG1"	chr12	-	54165373	54165478	54121276	54121455	54172024	54172109	14877	3,6,0	0,5,2	8,4,4	0,0,1	254	149	0.000289755	0.0205715	1.0,0.413,0.0	1.0,1.0,0.701	-0.429
66709	"ENSG00000203865"	"ATP1A1-AS1"	chr1	-	116413761	116413913	116405838	116406148	116418458	116418580	66709	4,1,9	5,12,3	8,4,10	0,1,4	298	149	0.00331135	0.110037	0.286,0.04,0.6	1.0,0.667,0.556	-0.432
28476	"ENSG00000134138"	"MEIS2"	chr15	-	36894716	36894812	36891020	36892459	36895150	36895240	28476	0,1,0	3,2,1	3,9,1	4,0,2	245	149	2.57497e-05	0.00431192	0.0,0.233,0.0	0.313,1.0,0.233	-0.438
41718	"ENSG00000177628"	"GBA"	chr1	-	155244094	155244233	155241085	155241180	155244505	155244636	41718	5,15,9	14,16,13	33,16,16	4,4,6	288	149	1.42402e-06	0.000606599	0.156,0.327,0.264	0.81,0.674,0.58	-0.439
1072	"ENSG00000207751"	"AP000553"	chr22	+	21658642	21658686	21658265	21658462	21660836	21661021	1072	3,0,0	3,1,1	4,0,2	1,6,0	193	149	0.0351283	0.492732	0.436,0.0,0.0	0.755,0.0,1.0	-0.44
57138	"ENSG00000164241"	"C5orf63"	chr5	-	127056396	127056506	127052612	127052669	127058881	127059002	57138	7,0,1	12,6,4	4,6,10	2,2,5	259	149	0.000305164	0.0214172	0.251,0.0,0.126	0.535,0.633,0.535	-0.442
50696	"ENSG00000128596"	"CCDC136"	chr7	+	128811799	128812312	128805760	128805901	128812707	128812929	50696	4,0,0	0,1,4	2,3,2	0,0,2	298	149	0.000239835	0.018444	1.0,0.0,0.0	1.0,1.0,0.333	-0.444
17573	"ENSG00000012779"	"ALOX5"	chr10	+	45444115	45444286	45443727	45443828	45445507	45445687	17573	0,7,0	1,0,2	2,1,10	1,0,1	298	149	0.000671759	0.0378522	0.0,1.0,0.0	0.5,1.0,0.833	-0.444
23961	"ENSG00000152292"	"SH2D6"	chr2	+	85436465	85436594	85435665	85435824	85436836	85436921	23961	3,1,0	3,0,1	5,4,4	0,0,1	278	149	0.0017229	0.0716851	0.349,1.0,0.0	1.0,1.0,0.682	-0.444
28405	"ENSG00000184371"	"CSF1"	chr1	+	109923165	109923711	109921846	109921994	109924059	109924190	28405	0,5,7	1,2,2	2,4,7	0,0,3	298	149	0.026228	0.412886	0.0,0.556,0.636	1.0,1.0,0.538	-0.449
70497	"ENSG00000102897"	"LYRM1"	chr16	+	20902485	20902717	20900665	20900889	20915555	20915714	70497	6,2,1	6,1,4	6,25,6	0,30,0	298	149	0.0114284	0.247537	0.333,0.5,0.111	1.0,0.294,1.0	-0.45
18087	"ENSG00000042088"	"TDP1"	chr14	+	89956577	89956800	89956036	89956278	89963107	89963552	18087	5,0,5	1,5,3	1,8,25	0,2,2	298	149	0.00226642	0.0848295	0.714,0.0,0.455	1.0,0.667,0.862	-0.453
50765	"ENSG00000105376"	"ICAM5"	chr19	+	10291071	10291316	10290023	10290125	10291488	10291708	50765	0,0,7	2,4,4	10,6,3	0,3,3	298	149	0.00685496	0.178368	0.0,0.0,0.467	1.0,0.5,0.333	-0.455
68048	"ENSG00000225470"	"JPX"	chrX	+	73994839	73994961	73944181	73944662	73998767	73998844	68048	5,3,4	3,1,2	2,1,2	0,0,0	271	149	7.50074e-06	0.00177743	0.478,0.623,0.524	1.0,1.0,1.0	-0.458
28959	"ENSG00000131375"	"CAPN7"	chr3	+	15245525	15245671	15242177	15242253	15246731	15246794	28959	5,14,0	2,2,5	10,14,11	2,0,0	295	149	5.68605e-05	0.00742549	0.558,0.78,0.0	0.716,1.0,1.0	-0.459
8226	"ENSG00000261832"	"AC138894"	chr16	-	28488590	28488662	28487455	28487541	28491481	28491513	8226	0,1,6	2,5,3	1,7,3	1,0,1	221	149	9.66618e-05	0.0105198	0.0,0.119,0.574	0.403,1.0,0.669	-0.46
57170	"ENSG00000245937"	"LINC01184"	chr5	-	128076946	128077093	128061143	128061244	128081972	128082194	57170	1,0,0	14,9,6	4,2,4	6,5,0	296	149	4.39303e-05	0.00616437	0.035,0.0,0.0	0.251,0.168,1.0	-0.461
56496	"ENSG00000247828"	"TMEM161B-AS1"	chr5	+	88282041	88282106	88269467	88270585	88436272	88436674	56496	3,2,1	2,5,12	6,2,9	4,0,3	214	149	0.00262423	0.0936192	0.511,0.218,0.055	0.511,1.0,0.676	-0.468
4959	"ENSG00000173821"	"RNF213"	chr17	+	80278763	80278910	80273240	80273404	80287814	80288363	4959	0,0,8	3,8,6	11,5,7	0,6,3	296	149	0.00238245	0.0879356	0.0,0.0,0.402	1.0,0.296,0.54	-0.478
31304	"ENSG00000079156"	"OSBPL6"	chr2	+	178372125	178372233	178361681	178361815	178373889	178374027	31304	4,1,4	1,3,5	12,3,5	1,0,1	257	149	3.06523e-05	0.00491839	0.699,0.162,0.317	0.874,1.0,0.744	-0.48
69445	"ENSG00000174353"	"STAG3L3"	chr7	-	73000357	73000481	72999760	72999859	73003020	73003137	69445	0,0,1	5,1,2	9,0,10	1,1,1	273	149	2.93101e-06	0.00092812	0.0,0.0,0.214	0.831,0.0,0.845	-0.487
64571	"ENSG00000186704"	"DTX2P1"	chr7	+	76995454	76995595	76990268	76990369	77000308	77000388	64571	1,0,0	2,1,1	2,16,0	0,4,2	290	149	0.000905771	0.0464281	0.204,0.0,0.0	1.0,0.673,0.0	-0.49
66851	"ENSG00000178234"	"GALNT11"	chr7	+	152079286	152079408	152025797	152025884	152094189	152094522	66851	2,0,0	1,2,4	2,0,6	0,6,0	271	149	0.00147818	0.0658684	0.524,0.0,0.0	1.0,0.0,1.0	-0.492
50868	"ENSG00000203666"	"EFCAB2"	chr1	+	245017241	245017326	245002120	245002232	245059385	245059458	50868	10,2,0	0,2,2	11,5,2	1,0,0	234	149	0.0029901	0.102877	1.0,0.389,0.0	0.875,1.0,1.0	-0.495
52019	"ENSG00000166444"	"DENND2B"	chr11	-	8831555	8831688	8811246	8811335	8870953	8871088	52019	2,0,2	0,1,1	1,2,4	0,0,0	282	149	0.0453939	0.57948	1.0,0.0,0.514	1.0,1.0,1.0	-0.495
23444	"ENSG00000256632"	"AC135586"	chr12	+	132701249	132701369	132690262	132690376	132714857	132714912	23444	0,11,5	7,4,6	9,4,4	0,0,3	269	149	0.000749835	0.041013	0.0,0.604,0.316	1.0,1.0,0.425	-0.502
6852	"ENSG00000167840"	"ZNF232"	chr17	-	5111075	5111219	5108925	5109868	5111799	5111815	6852	1,9,6	4,9,6	15,12,24	0,7,2	293	149	0.000383948	0.0251619	0.113,0.337,0.337	1.0,0.466,0.859	-0.513
42192	"ENSG00000147044"	"CASK"	chrX	-	41555599	41555635	41553718	41553915	41557031	41557100	42192	0,1,0	5,5,3	3,2,2	0,5,2	185	149	3.25668e-05	0.00506654	0.0,0.139,0.0	1.0,0.244,0.446	-0.517
52582	"ENSG00000115970"	"THADA"	chr2	-	43592843	43592890	43592316	43592416	43595930	43596007	52582	0,0,2	1,5,2	5,0,1	0,6,0	196	149	0.00350771	0.114259	0.0,0.0,0.432	1.0,0.0,1.0	-0.523
5723	"ENSG00000002919"	"SNX11"	chr17	+	48110707	48110767	48107893	48107979	48112030	48112085	5723	0,4,7	8,4,0	1,2,4	0,0,0	209	149	2.10848e-06	0.000762077	0.0,0.416,1.0	1.0,1.0,1.0	-0.528
21925	"ENSG00000062485"	"CS"	chr12	-	56291630	56291793	56286594	56286645	56298608	56298691	21925	8,0,4	3,14,6	3,6,3	0,0,2	298	149	5.26744e-05	0.00698072	0.571,0.0,0.25	1.0,1.0,0.429	-0.536
44323	"ENSG00000197989"	"SNHG12"	chr1	-	28579941	28579981	28579532	28579587	28581589	28581695	44323	6,3,3	3,5,3	1,3,1	0,0,0	189	149	1.48129e-09	4.26038e-06	0.612,0.321,0.441	1.0,1.0,1.0	-0.542
22799	"ENSG00000138162"	"TACC2"	chr10	+	122143571	122143706	122132608	122132734	122195039	122195176	22799	0,14,8	5,6,6	9,22,8	0,1,2	284	149	1.53653e-05	0.00299137	0.0,0.55,0.412	1.0,0.92,0.677	-0.545
49445	"ENSG00000115392"	"FANCL"	chr2	-	58194228	58194273	58165723	58165874	58198593	58198662	49445	3,0,0	8,3,6	6,2,2	12,1,0	194	149	0.00151792	0.0671061	0.224,0.0,0.0	0.277,0.606,1.0	-0.553
29407	"ENSG00000122085"	"MTERF4"	chr2	-	241099395	241099894	241094405	241094432	241102252	241102287	29407	0,2,0	3,6,3	4,2,5	0,3,2	298	149	4.05287e-05	0.00587124	0.0,0.143,0.0	1.0,0.25,0.556	-0.554
41479	"ENSG00000138078"	"PREPL"	chr2	-	44359496	44360038	44346267	44346390	44361416	44361561	41479	4,5,0	0,5,4	9,6,3	0,0,0	298	149	9.33511e-07	0.000434345	1.0,0.333,0.0	1.0,1.0,1.0	-0.556
29300	"ENSG00000198836"	"OPA1"	chr3	+	193626091	193626202	193618702	193618936	193631611	193631665	29300	5,5,1	4,6,4	14,3,12	0,0,6	260	149	0.000632673	0.0363376	0.417,0.323,0.125	1.0,1.0,0.534	-0.556
46089	"ENSG00000073614"	"KDM5A"	chr12	-	286125	286207	285455	285662	292758	292925	46089	0,2,0	1,6,9	6,4,1	6,3,0	231	149	0.000137077	0.0129417	0.0,0.177,0.0	0.392,0.462,1.0	-0.559
55032	"ENSG00000121753"	"ADGRB2"	chr1	-	31742837	31743002	31742052	31742217	31744192	31744357	55032	2,7,7	7,4,10	21,25,12	0,11,0	298	149	4.96385e-05	0.0067279	0.125,0.467,0.259	1.0,0.532,1.0	-0.56
6117	"ENSG00000161395"	"PGAP3"	chr17	-	39673992	39674054	39671121	39672866	39684596	39684749	6117	0,2,4	3,3,4	6,4,4	0,0,4	211	149	0.00119573	0.0562968	0.0,0.32,0.414	1.0,1.0,0.414	-0.56
56265	"ENSG00000251669"	"FAM86EP"	chr4	-	3951138	3951219	3947498	3948220	3953110	3953165	56265	9,0,3	5,5,2	6,3,4	0,0,1	230	149	1.38596e-06	0.000597501	0.538,0.0,0.493	1.0,1.0,0.722	-0.564
61436	"ENSG00000204852"	"TCTN1"	chr12	+	110644966	110645129	110641023	110641149	110647210	110647336	61436	12,5,0	2,2,2	6,15,9	0,0,0	298	149	1.72552e-05	0.00328418	0.75,0.556,0.0	1.0,1.0,1.0	-0.565
62506	"ENSG00000197818"	"SLC9A8"	chr20	+	49850809	49850844	49849578	49849680	49855437	49855581	62506	0,8,2	1,5,2	3,8,13	0,1,2	184	149	0.00168845	0.0709222	0.0,0.564,0.447	1.0,0.866,0.84	-0.565
25234	"ENSG00000214135"	"AC132008"	chr3	-	197622186	197622330	197621703	197621868	197623219	197623382	25234	3,1,14	1,10,4	7,3,8	0,0,0	293	149	1.57777e-09	4.26038e-06	0.604,0.048,0.64	1.0,1.0,1.0	-0.569
59204	"ENSG00000166529"	"ZSCAN21"	chr7	+	100051477	100051610	100049793	100049841	100056910	100057405	59204	3,2,3	11,2,8	4,7,4	0,0,4	282	149	0.000189757	0.0158443	0.126,0.346,0.165	1.0,1.0,0.346	-0.57
26520	"ENSG00000150782"	"IL18"	chr11	-	112153591	112153603	112150071	112150206	112154974	112155061	26520	0,0,0	6,10,4	0,102,62	5,13,11	161	149	5.95642e-08	6.6604e-05	0.0,0.0,0.0	0.0,0.879,0.839	-0.573
33363	"ENSG00000153214"	"TMEM87B"	chr2	+	112074911	112074962	112066935	112067067	112077191	112077282	33363	0,1,10	2,2,0	6,4,7	0,0,0	200	149	0.00247954	0.0898005	0.0,0.271,1.0	1.0,1.0,1.0	-0.576
52524	"ENSG00000038219"	"BOD1L1"	chr4	-	13572701	13572842	13569505	13570128	13576837	13576991	52524	3,3,0	3,2,1	2,1,2	0,0,1	290	149	3.83746e-05	0.00565069	0.339,0.435,0.0	1.0,1.0,0.507	-0.578
37376	"ENSG00000177058"	"SLC38A9"	chr5	-	55711351	55711499	55697845	55697992	55712216	55712291	37376	0,4,0	1,1,1	4,1,1	3,0,0	297	149	0.00952322	0.221129	0.0,0.667,0.0	0.401,1.0,1.0	-0.578
18502	"ENSG00000167283"	"ATP5MG"	chr11	+	118405656	118405709	118403923	118403985	118406936	118407097	18502	9,0,1	0,3,5	9,6,10	1,0,0	202	149	1.75885e-05	0.00331238	1.0,0.0,0.129	0.869,1.0,1.0	-0.58
36164	"ENSG00000077458"	"FAM76B"	chr11	-	95779077	95779135	95778821	95778957	95779606	95779687	36164	0,0,0	4,3,4	1,0,4	0,2,1	207	149	0.0310341	0.458301	0.0,0.0,0.0	1.0,0.0,0.742	-0.581
29647	"ENSG00000108771"	"DHX58"	chr17	-	42105735	42105989	42105017	42105167	42107603	42107795	29647	3,0,5	2,13,2	6,1,3	1,0,0	298	149	7.94088e-07	0.00039464	0.429,0.0,0.556	0.75,1.0,1.0	-0.588
5004	"ENSG00000171302"	"CANT1"	chr17	-	79000099	79000270	78998147	78998286	79009663	79009764	5004	0,18,17	6,8,9	7,26,26	0,3,0	298	149	5.16064e-07	0.000279785	0.0,0.529,0.486	1.0,0.813,1.0	-0.599
41005	"ENSG00000136770"	"DNAJC1"	chr10	-	21928505	21928552	21919902	21919929	21929039	21929141	41005	0,2,2	2,4,3	1,4,4	0,4,0	196	149	0.00187034	0.0757923	0.0,0.275,0.336	1.0,0.432,1.0	-0.607
56879	"ENSG00000171634"	"BPTF"	chr17	+	67886127	67886316	67874919	67875020	67891843	67891962	56879	3,1,3	1,3,2	4,4,6	0,0,0	298	149	3.74555e-07	0.000231075	0.6,0.143,0.429	1.0,1.0,1.0	-0.609
44715	"ENSG00000159023"	"EPB41"	chr1	+	29060421	29060484	29053103	29053312	29064981	29065158	44715	13,0,1	6,1,6	5,3,6	0,0,3	212	149	0.000712501	0.0394655	0.604,0.0,0.105	1.0,1.0,0.584	-0.625
7690	"ENSG00000124074"	"ENKD1"	chr16	-	67663936	67664062	67663419	67663556	67666070	67666274	7690	0,0,5	4,5,7	4,8,3	4,1,0	275	149	0.000404105	0.0261409	0.0,0.0,0.279	0.351,0.813,1.0	-0.628
9080	"ENSG00000185596"	"WASH3P"	chr15	+	101971822	101972049	101966069	101966223	101972407	101972465	9080	9,0,1	0,5,4	1,2,2	0,0,0	298	149	2.55062e-07	0.000184319	1.0,0.0,0.111	1.0,1.0,1.0	-0.63
39992	"ENSG00000169727"	"GPS1"	chr17	+	82052377	82052459	82051896	82051964	82053233	82053366	39992	1,1,6	2,2,5	2,7,6	0,1,0	231	149	4.40893e-07	0.000253521	0.244,0.244,0.436	1.0,0.819,1.0	-0.632
39802	"ENSG00000061987"	"MON2"	chr12	+	62566013	62566031	62565236	62565380	62566321	62566450	39802	0,7,0	3,2,1	5,2,6	1,0,1	167	149	6.01156e-05	0.00770988	0.0,0.757,0.0	0.817,1.0,0.843	-0.634
39946	"ENSG00000204604"	"ZNF468"	chr19	-	52845178	52845296	52838535	52842151	52849086	52849213	39946	0,2,3	4,3,4	8,7,2	0,4,0	267	149	0.000141182	0.0132245	0.0,0.271,0.295	1.0,0.494,1.0	-0.643
28811	"ENSG00000163354"	"DCST2"	chr1	-	155024471	155024602	155023831	155023959	155026547	155026715	28811	0,2,0	5,3,10	3,2,2	0,4,0	280	149	2.89481e-05	0.00468698	0.0,0.262,0.0	1.0,0.21,1.0	-0.649
52639	"ENSG00000116747"	"RO60"	chr1	+	193069033	193069181	193059618	193059776	193075819	193075890	52639	3,2,1	1,4,2	5,5,1	0,0,0	297	149	2.97274e-09	6.64817e-06	0.601,0.201,0.201	1.0,1.0,1.0	-0.666
17400	"ENSG00000171988"	"JMJD1C"	chr10	-	63219877	63219983	63217206	63217331	63264650	63264764	17400	1,0,0	0,1,4	4,3,1	0,0,0	255	149	4.16547e-07	0.000244342	1.0,0.0,0.0	1.0,1.0,1.0	-0.667
44966	"ENSG00000148290"	"SURF1"	chr9	-	133356268	133356320	133354658	133354741	133356399	133356487	44966	0,0,0	3,1,3	0,2,2	4,0,0	201	149	0.000647015	0.0368068	0.0,0.0,0.0	0.0,1.0,1.0	-0.667
28909	"ENSG00000175322"	"ZNF519"	chr18	-	14124349	14124476	14099937	14106409	14132274	14132428	28909	0,0,7	2,1,0	4,11,3	0,0,0	276	149	0.000937284	0.0474542	0.0,0.0,1.0	1.0,1.0,1.0	-0.667
42445	"ENSG00000166455"	"C16orf46"	chr16	-	81066192	81066281	81053496	81054094	81077135	81077238	42445	0,0,7	1,2,0	1,3,1	0,0,0	238	149	0.00177141	0.0731081	0.0,0.0,1.0	1.0,1.0,1.0	-0.667
35126	"ENSG00000112759"	"SLC29A1"	chr6	+	44225924	44226167	44223600	44223641	44227262	44227342	35126	4,10,0	28,33,13	10,15,1	19,0,0	298	149	0.000386122	0.0251735	0.067,0.132,0.0	0.208,1.0,1.0	-0.67
65927	"ENSG00000287725"	"AP003071"	chr11	+	69079833	69079883	69078891	69079020	69081399	69081499	65927	1,5,0	5,2,7	4,8,4	0,1,0	199	149	1.71992e-08	2.56425e-05	0.13,0.652,0.0	1.0,0.857,1.0	-0.692
56594	"ENSG00000158062"	"UBXN11"	chr1	-	26302812	26302918	26297961	26298062	26306591	26306609	56594	0,0,0	7,3,1	2,2,3	0,11,0	255	149	2.6908e-05	0.0044575	0.0,0.0,0.0	1.0,0.096,1.0	-0.699
12825	"ENSG00000253710"	"ALG11"	chr13	+	52024585	52024937	52012410	52012462	52028318	52028689	12825	0,1,12	10,7,7	6,15,7	0,3,0	298	149	1.14628e-07	0.000105346	0.0,0.067,0.462	1.0,0.714,1.0	-0.728
59991	"ENSG00000204642"	"HLA-F"	chr6	+	29725992	29726043	29725533	29725563	29726882	29727296	59991	0,0,1	2,3,4	2,2,5	0,0,4	200	149	3.37309e-07	0.000219447	0.0,0.0,0.157	1.0,1.0,0.482	-0.775
22658	"ENSG00000136870"	"ZNF189"	chr9	+	101399394	101399530	101399027	101399189	101399925	101400010	22658	1,0,0	3,2,2	2,1,1	0,0,0	285	149	3.77476e-15	6.75342e-11	0.148,0.0,0.0	1.0,1.0,1.0	-0.951
20758	"ENSG00000026508"	"CD44"	chr11	+	35189835	35190066	35196746	35196875	35198121	35198247	20758	81,78,67	0,0,0	64,108,97	9,0,0	266	149	0.60865	0.0207584	1.0,1.0,1.0	0.799,1.0,1.0	-0.967
42914	"ENSG00000113845"	"TIMMDC1"	chr3	+	1195000694	1195000860	119503531	119503620	119503954	119504022	42914	32,48,57	0,4,2	28,51,56	5,5,3	217	149	0.049453	0.610393	1.0,0.892,0.951	0.794,0.875,0.928	-0.882
40850	"ENSG00000157916"	"RER1"	chr1	+	2399414	2399514	2397115	2397220	2402206	2402316	40850	195,355,427	4,6,6	227,388,402	8,0,22	249	149	0.0498322	0.613591	0.967,0.973,0.977	0.944,1.0,0.916	-0.819
56781	"ENSG00000041357"	"PSMA4"	chr15	+	78546574	78546698	78545633	78545764	78548789	78548820	56781	1590,357,405	29,1,4	725,569,430	5,5,3	273	149	0.0296765	0.445159	0.968,0.995,0.982	0.988,0.984,0.987	-0.805
16383	"ENSG00000125319"	"HROB"	chr17	+	44152636	44152777	44150960	44151044	44154555	44154664	16383	103,64,47	1,6,4	88,60,50	7,12,6	290	149	0.0128163	0.266049	0.981,0.846,0.858	0.866,0.72,0.811	-0.896

## Sheet: MXE
ID	GeneID	geneSymbol	chr	strand	1stExonStart_0base	1stExonEnd	2ndExonStart_0base	2ndExonEnd	upstreamES	upstreamEE	downstreamES	downstreamEE	ID	IJC_SAMPLE_1	SJC_SAMPLE_1	IJC_SAMPLE_2	SJC_SAMPLE_2	IncFormLen	SkipFormLen	PValue	FDR	IncLevel1	IncLevel2	IncLevelDifference
2119	"ENSG00000062485"	"CS"	chr12	-	56291630	56291793	56298608	56298691	56286594	56286645	56300159	56300391	2119	6,13,6	6,1,4	0,0,0	3,6,4	232	298	1.87242e-11	8.25739e-08	0.562,0.943,0.658	0.0,0.0,0.0	0.721
5119	"ENSG00000151575"	"TEX9"	chr15	+	56373440	56373504	56412301	56412436	56365578	56365670	56427604	56427739	5119	6,2,2	2,0,0	0,0,2	1,2,0	213	284	0.00564333	0.182993	0.8,1.0,1.0	0.0,0.0,1.0	0.6
2801	"ENSG00000136122"	"BORA"	chr13	+	72728925	72729093	72731280	72731387	72727922	72728007	72734959	72735005	2801	17,7,4	12,0,0	3,2,0	9,1,4	298	256	0.000800433	0.0543063	0.549,1.0,1.0	0.223,0.632,0.0	0.565
4871	"ENSG00000284952"	"AC104472"	chr3	-	155833467	155833585	155833856	155834041	155829687	155829903	155842431	155842997	4871	6,6,11	4,2,8	0,2,2	6,7,10	298	267	8.4283e-06	0.00337898	0.573,0.729,0.552	0.0,0.204,0.152	0.499
2259	"ENSG00000116171"	"SCP2"	chr1	+	52941795	52941853	52948008	52948080	52927285	52927465	52950754	52950886	2259	4,2,4	2,0,3	3,1,0	3,3,1	207	221	0.0271434	0.429041	0.681,1.0,0.587	0.516,0.262,0.0	0.497
4051	"ENSG00000188672"	"RHCE"	chr1	-	25388975	25389113	25391993	25392141	25385710	25385844	25402595	25402746	4051	6,4,6	0,4,0	0,5,0	2,0,1	297	287	0.0352508	0.488687	1.0,0.491,1.0	0.0,1.0,0.0	0.497
6158	"ENSG00000084636"	"COL16A1"	chr1	-	31662333	31662387	31662586	31662658	31661659	31661704	31665171	31665234	6158	2,2,1	0,2,1	2,0,0	2,4,1	221	203	0.00036423	0.0321251	1.0,0.479,0.479	0.479,0.0,0.0	0.493
2863	"ENSG00000140367"	"UBE2Q2"	chr15	+	75890918	75891014	75896994	75897061	75890434	75890483	75899426	75899650	2863	3,5,13	2,1,1	7,2,1	4,9,4	245	216	0.000359296	0.0321251	0.569,0.815,0.92	0.607,0.164,0.181	0.451
6430	"ENSG00000198223"	"CSF2RA"	chrX	+	1300490	1300626	1303922	1304019	1295426	1295456	1305445	1305527	6430	0,4,1	1,0,1	0,1,0	1,6,2	285	246	0.000273043	0.0259114	0.0,1.0,0.463	0.0,0.126,0.0	0.446
2670	"ENSG00000285533"	"RELA-DT"	chr11	+	65663426	65663683	65666130	65666217	65663085	65663148	65671422	65671716	2670	6,2,3	0,18,5	0,0,1	15,12,7	298	236	3.15407e-05	0.0086934	1.0,0.081,0.322	0.0,0.0,0.102	0.434
5897	"ENSG00000110756"	"HPS5"	chr11	-	18291441	18292019	18292898	18292976	18287892	18288013	18295019	18295169	5897	6,6,3	1,0,5	3,7,0	9,3,2	227	298	0.0295406	0.44467	0.887,1.0,0.441	0.304,0.754,0.0	0.423
1598	"ENSG00000165868"	"HSPA12A"	chr10	-	116707199	116707285	116834934	116835022	116705150	116705278	116849565	116849710	1598	2,5,3	6,2,4	2,0,0	14,14,9	237	235	6.88382e-06	0.00337307	0.248,0.713,0.426	0.124,0.0,0.0	0.421
5410	"ENSG00000198780"	"FAM169A"	chr5	-	74813839	74814019	74834425	74834597	74805155	74805284	74838964	74839050	5410	1,3,2	2,0,0	1,9,0	4,1,5	298	298	0.00116444	0.0693942	0.333,1.0,1.0	0.2,0.9,0.0	0.411
6080	"ENSG00000184465"	"WDR27"	chr6	-	169659085	169659207	169659450	169659518	169658275	169658358	169660662	169660766	6080	2,0,1	0,1,0	2,0,1	2,3,4	217	271	7.67854e-05	0.0164997	1.0,0.0,1.0	0.555,0.0,0.238	0.402
3962	"ENSG00000101004"	"NINL"	chr20	-	25498209	25498346	25500839	25501010	25496662	25496803	25503951	25504104	3962	4,9,5	0,7,0	2,5,3	3,7,2	298	286	0.013266	0.299459	1.0,0.552,1.0	0.39,0.407,0.59	0.388
6193	"ENSG00000154743"	"TSEN2"	chr3	+	12505153	12505231	12516610	12516661	12503261	12503784	12519058	12519197	6193	9,4,6	5,2,6	3,2,1	7,8,7	227	200	0.000761111	0.0532777	0.613,0.638,0.468	0.274,0.181,0.112	0.384
3532	"ENSG00000152348"	"ATG10"	chr5	+	82058494	82058602	82164398	82164537	81987557	81987678	82178489	82178587	3532	8,11,22	4,19,3	4,6,7	18,15,16	257	288	0.00101058	0.06142	0.691,0.393,0.892	0.199,0.31,0.329	0.379
1377	"ENSG00000090612"	"ZNF268"	chr12	+	133187871	133188072	133191488	133191615	133181945	133182030	133191907	133192003	1377	11,4,1	4,0,6	1,2,0	1,6,5	298	276	0.00272664	0.121012	0.718,1.0,0.134	0.481,0.236,0.0	0.378
5011	"ENSG00000145819"	"ARHGAP26"	chr5	+	143147230	143147381	143207197	143207308	143133966	143134105	143213996	143214088	5011	13,12,12	6,1,5	9,3,2	5,6,7	298	260	0.00681423	0.205827	0.654,0.913,0.677	0.611,0.304,0.2	0.376
4889	"ENSG00000185379"	"RAD51D"	chr17	-	35106987	35107122	35118500	35118619	35106440	35106481	35119110	35119157	4889	0,6,2	2,0,1	1,2,0	2,8,3	268	284	0.00281998	0.121923	0.0,1.0,0.679	0.346,0.209,0.0	0.375
2852	"ENSG00000144840"	"RABL3"	chr3	-	120694152	120694224	120698422	120698573	120690448	120690487	120705999	120706114	2852	21,5,3	5,1,0	10,1,8	3,2,7	298	221	0.0374895	0.499483	0.757,0.788,1.0	0.712,0.271,0.459	0.368
2779	"ENSG00000214021"	"TTLL3"	chr3	+	9816073	9816202	9820545	9820741	9813247	9813345	9825799	9825948	2779	3,13,6	2,8,2	3,2,2	12,7,2	278	298	0.001828	0.0905787	0.617,0.635,0.763	0.211,0.234,0.517	0.351
4069	"ENSG00000151665"	"PIGF"	chr2	-	46588074	46588179	46591802	46591925	46581284	46581591	46592474	46592583	4069	11,10,8	5,1,1	2,13,2	4,2,6	272	254	0.0390471	0.509512	0.673,0.903,0.882	0.318,0.859,0.237	0.348
735	"ENSG00000007237"	"GAS7"	chr17	-	9969676	9969762	9981803	9981884	9959201	9959255	10019776	10019897	735	2,10,2	4,3,3	0,6,1	10,9,11	230	235	0.00636151	0.197565	0.338,0.773,0.405	0.0,0.405,0.085	0.342
5355	"ENSG00000174652"	"ZNF266"	chr19	-	9433667	9433786	9434064	9434235	9420064	9420218	9434797	9434859	5355	0,2,2	3,3,1	0,0,0	2,3,3	298	268	0.0468904	0.540832	0.0,0.375,0.643	0.0,0.0,0.0	0.339
4382	"ENSG00000115355"	"CCDC88A"	chr2	-	55349517	55349599	55355578	55355751	55346174	55346333	55362307	55362448	4382	5,3,1	0,0,0	0,1,1	4,0,0	298	231	0.0451734	0.530783	1.0,1.0,1.0	0.0,1.0,1.0	0.333
1434	"ENSG00000120071"	"KANSL1"	chr17	-	46094559	46094701	46170854	46172232	46082440	46082542	46223670	46223804	1434	6,12,9	3,2,7	2,3,12	7,15,5	298	291	0.0203201	0.374945	0.661,0.854,0.557	0.218,0.163,0.701	0.33
4765	"ENSG00000143850"	"PLEKHA6"	chr1	-	204250545	204250614	204256801	204256888	204249183	204249264	204257352	204257869	4765	3,4,1	1,16,15	0,0,0	6,24,11	236	218	0.000401374	0.034707	0.735,0.188,0.058	0.0,0.0,0.0	0.327
4782	"ENSG00000115392"	"FANCL"	chr2	-	58163028	58163074	58163433	58163517	58162865	58162947	58165723	58165874	4782	5,10,9	2,1,0	8,1,2	1,7,1	233	195	0.00540447	0.177864	0.677,0.893,1.0	0.87,0.107,0.626	0.322
5	"ENSG00000160201"	"U2AF1"	chr21	-	43100452	43100519	43101365	43101432	43095693	43095743	43104314	43104402	5	53,371,6	5,97,6	72,14,3	17,49,11	216	216	0.0107318	0.280022	0.914,0.793,0.5	0.809,0.222,0.214	0.321
1176	"ENSG00000012983"	"MAP4K5"	chr14	-	50425906	50425977	50428661	50428754	50423120	50423176	50429191	50429260	1176	2,3,6	4,3,3	0,1,0	2,1,5	242	220	3.02055e-05	0.0086934	0.313,0.476,0.645	0.0,0.476,0.0	0.319
3657	"ENSG00000138376"	"BARD1"	chr2	-	214780559	214781509	214792296	214792445	214769231	214769312	214797060	214797117	3657	2,3,4	1,0,0	3,1,1	11,0,1	298	298	0.000235373	0.0247142	0.667,1.0,1.0	0.214,1.0,0.5	0.318
2944	"ENSG00000144233"	"AMMECR1L"	chr2	-	127869453	127869544	127871248	127871359	127866899	127866996	127873827	127874272	2944	1,15,10	2,10,6	1,1,12	8,14,17	260	240	0.0035855	0.145065	0.316,0.581,0.606	0.103,0.062,0.395	0.314
2179	"ENSG00000138162"	"TACC2"	chr10	+	122132608	122132734	122143571	122143706	122088477	122088591	122195039	122195176	2179	5,10,6	2,7,1	5,3,3	4,15,3	275	284	0.0167052	0.33858	0.721,0.596,0.861	0.563,0.171,0.508	0.312
6290	"ENSG00000121716"	"PILRB"	chr7	+	100353372	100353483	100353894	100354012	100353209	100353270	100355142	100355240	6290	7,15,14	10,5,13	2,3,5	7,9,13	260	267	0.00367303	0.147255	0.418,0.755,0.525	0.227,0.255,0.283	0.311
1299	"ENSG00000123191"	"ATP7B"	chr13	-	51944108	51944291	51946283	51946478	51942385	51942554	51949661	51949796	1299	2,4,6	0,2,1	6,1,5	1,8,3	298	298	0.0114327	0.289759	1.0,0.667,0.857	0.857,0.111,0.625	0.31
4836	"ENSG00000162591"	"MEGF6"	chr1	-	3498370	3498499	3499137	3499266	3497232	3497361	3499587	3499716	4836	4,3,0	0,7,11	0,3,0	5,5,7	278	278	0.0437265	0.524485	1.0,0.3,0.0	0.0,0.375,0.0	0.308
3245	"ENSG00000187800"	"PEAR1"	chr1	+	156908127	156908340	156908654	156908829	156907914	156908051	156908915	156909036	3245	3,1,2	1,0,1	0,3,1	3,3,0	298	298	0.00214396	0.101665	0.75,1.0,0.667	0.0,0.5,1.0	0.306
609	"ENSG00000133424"	"LARGE1"	chr22	-	33304228	33304507	33316084	33316248	33283201	33283348	33337645	33337801	609	2,4,11	0,0,2	1,4,11	0,4,14	298	298	0.000164162	0.0204993	1.0,1.0,0.846	1.0,0.5,0.44	0.302
5815	"ENSG00000169902"	"TPST1"	chr7	+	66240324	66241270	66286510	66286709	66205333	66205522	66352504	66352555	5815	11,6,11	6,13,17	1,9,12	21,37,43	298	298	0.00233941	0.108598	0.647,0.316,0.393	0.045,0.196,0.218	0.299
5170	"ENSG00000130940"	"CASZ1"	chr1	-	10693873	10693912	10705491	10705544	10665082	10665571	10760700	10760857	5170	3,5,4	1,2,1	7,5,9	9,9,6	202	188	0.0168176	0.33858	0.736,0.699,0.788	0.42,0.341,0.583	0.293
5432	"ENSG00000085365"	"SCAMP1"	chr5	+	78421800	78421960	78449932	78450034	78418774	78418903	78459244	78459362	5432	17,6,9	20,9,3	11,4,1	23,16,4	298	251	0.017821	0.347747	0.417,0.36,0.716	0.287,0.174,0.174	0.286
3455	"ENSG00000163328"	"GPR155"	chr2	-	174453736	174453841	174459877	174460088	174446610	174446747	174461401	174461492	3455	2,1,3	1,0,0	1,2,5	0,2,8	298	254	7.9368e-05	0.0164997	0.63,1.0,1.0	1.0,0.46,0.348	0.274
1422	"ENSG00000198431"	"TXNRD1"	chr12	+	104290992	104291104	104309758	104309950	104288930	104289040	104311289	104311412	1422	3,10,11	0,0,0	8,9,2	0,3,3	261	298	0.00269877	0.121012	1.0,1.0,1.0	1.0,0.774,0.432	0.265
4409	"ENSG00000186007"	"LEMD1"	chr1	-	205416231	205416296	205419229	205419352	205384287	205384364	205420454	205420574	4409	1,1,4	0,0,0	5,6,4	0,1,5	272	214	0.00213511	0.101665	1.0,1.0,1.0	1.0,0.825,0.386	0.263
760	"ENSG00000182557"	"SPNS3"	chr17	+	4478571	4478637	4486227	4486326	4453015	4453205	4486411	4486583	760	37,11,9	9,0,6	11,3,9	17,5,2	215	248	0.0317909	0.464232	0.826,1.0,0.634	0.427,0.409,0.838	0.262
2032	"ENSG00000152219"	"ARL14EP"	chr11	+	30330885	30331374	30332865	30332993	30323103	30323202	30336566	30338223	2032	11,13,18	13,8,7	11,1,8	16,22,6	298	277	0.0210372	0.384955	0.44,0.602,0.705	0.39,0.041,0.553	0.254
4004	"ENSG00000132676"	"DAP3"	chr1	+	155709772	155709824	155717005	155717128	155689090	155689174	155725381	155725490	4004	12,5,6	0,21,8	2,5,3	6,18,6	201	272	0.0485751	0.543155	1.0,0.244,0.504	0.311,0.273,0.404	0.253
6491	"ENSG00000147099"	"HDAC8"	chrX	-	72495155	72495268	72567888	72568030	72490928	72491006	72568753	72568884	6491	16,21,31	4,5,20	19,17,14	13,15,24	291	262	0.0093948	0.254178	0.783,0.791,0.583	0.568,0.505,0.344	0.247
2528	"ENSG00000153292"	"ADGRF1"	chr6	-	47016616	47016768	47020730	47020789	47014680	47014844	47021957	47022058	2528	4,4,2	9,5,11	2,0,1	11,4,5	208	298	0.0124622	0.299459	0.389,0.534,0.207	0.207,0.0,0.223	0.233
982	"ENSG00000157823"	"AP3S2"	chr15	-	89877305	89877424	89878264	89878300	89871474	89871546	89888520	89888632	982	4,2,2	6,12,19	0,0,1	4,6,10	185	268	0.000184118	0.0208195	0.491,0.194,0.132	0.0,0.0,0.127	0.23
1573	"ENSG00000226210"	"WASH8P"	chr12	-	17347	17483	17722	17859	16968	17170	18036	18183	1573	45,57,30	10,24,13	39,17,27	29,26,19	286	285	0.00123371	0.0715877	0.818,0.703,0.697	0.573,0.395,0.586	0.221
2676	"ENSG00000144589"	"STK11IP"	chr2	+	219606194	219606290	219606475	219606517	219605955	219606059	219606711	219606857	2676	27,23,28	13,7,10	17,18,8	22,23,4	245	191	0.00393116	0.154136	0.618,0.719,0.686	0.376,0.379,0.609	0.22
5806	"ENSG00000204305"	"AGER"	chr6	-	32181350	32181477	32181523	32181632	32180967	32181239	32182246	32182388	5806	7,2,0	8,4,1	0,0,1	3,2,5	258	276	9.22775e-05	0.0164997	0.483,0.348,0.0	0.0,0.0,0.176	0.218
3916	"ENSG00000181035"	"SLC25A42"	chr19	+	19101780	19101886	19104912	19104938	19096090	19096205	19105560	19105727	3916	9,41,29	0,7,3	17,23,27	7,7,8	255	175	0.0121527	0.299404	1.0,0.801,0.869	0.625,0.693,0.698	0.218
1724	"ENSG00000099246"	"RAB18"	chr10	+	27526827	27526889	27533734	27533853	27509874	27509930	27533927	27533994	1724	29,16,11	21,11,20	11,10,16	27,41,23	211	268	0.0107225	0.280022	0.637,0.649,0.411	0.341,0.237,0.469	0.217
5301	"ENSG00000185238"	"PRMT3"	chr11	+	20426765	20426865	20452129	20452208	20405445	20408032	20461979	20462167	5301	18,2,8	3,1,2	10,3,6	2,9,4	249	228	0.0339328	0.485856	0.846,0.647,0.786	0.821,0.234,0.579	0.215
1409	"ENSG00000111271"	"ACAD10"	chr12	+	111727961	111728143	111733922	111734068	111721670	111721739	111736830	111737004	1409	37,56,56	13,8,20	37,21,41	23,25,23	298	295	0.00079379	0.0543063	0.738,0.874,0.735	0.614,0.454,0.638	0.214
4379	"ENSG00000143363"	"PRUNE1"	chr1	+	151025514	151025673	151027232	151027327	151024741	151024795	151033805	151035711	4379	32,30,40	7,3,3	24,34,19	8,17,9	298	244	0.000294246	0.0270339	0.789,0.891,0.916	0.711,0.621,0.634	0.21
6689	"ENSG00000008513"	"ST3GAL1"	chr8	-	133499134	133499189	133545773	133545926	133465893	133466090	133571692	133571925	6689	3,13,18	0,0,0	9,6,16	1,2,2	298	204	0.0155805	0.331161	1.0,1.0,1.0	0.86,0.673,0.846	0.207
6051	"ENSG00000105429"	"MEGF8"	chr19	+	42348271	42348472	42349498	42349699	42344669	42344833	42350147	42350384	6051	14,31,30	1,11,7	7,24,25	6,15,9	298	298	0.0362779	0.494409	0.933,0.738,0.811	0.538,0.615,0.735	0.198
461	"ENSG00000061656"	"SPAG4"	chr20	+	35618611	35618720	35618922	35618998	35618449	35618475	35619194	35619310	461	18,10,9	21,14,9	9,4,1	16,10,8	258	225	0.0453167	0.530783	0.428,0.384,0.466	0.329,0.259,0.098	0.197
5306	"ENSG00000170190"	"SLC16A5"	chr17	+	75093588	75093835	75098037	75098181	75088937	75089304	75100006	75100816	5306	23,33,31	5,34,38	24,18,18	34,39,22	298	293	0.0476208	0.540832	0.819,0.488,0.445	0.41,0.312,0.446	0.195
1124	"ENSG00000108846"	"ABCC3"	chr17	+	50656701	50656827	50658081	50658207	50655831	50656008	50658434	50658496	1124	16,30,15	14,47,21	5,20,10	21,46,28	275	275	0.009929	0.265375	0.533,0.39,0.417	0.192,0.303,0.263	0.194
4656	"ENSG00000043514"	"TRIT1"	chr1	-	39847219	39847297	39847547	39847660	39844530	39844640	39847985	39848097	4656	14,20,32	8,8,8	15,32,12	22,11,16	262	227	0.0393976	0.509512	0.603,0.684,0.776	0.371,0.716,0.394	0.194
6196	"ENSG00000106070"	"GRB10"	chr7	-	50703820	50703908	50732271	50732368	50674435	50674658	50755886	50756056	6196	6,1,5	9,8,20	0,0,2	5,18,14	246	237	0.000161775	0.0204993	0.391,0.107,0.194	0.0,0.0,0.121	0.19
1361	"ENSG00000183570"	"PCBP3"	chr21	+	45913950	45914025	45917587	45917629	45910901	45911030	45929916	45929995	1361	4,5,1	6,8,17	2,2,0	13,22,9	224	191	0.012698	0.299459	0.362,0.348,0.048	0.116,0.072,0.0	0.19
2796	"ENSG00000058673"	"ZC3H11A"	chr1	+	203831660	203831771	203833790	203833853	203830122	203830203	203837965	203838064	2796	15,17,22	12,16,18	12,15,4	23,16,16	260	212	0.0259801	0.423302	0.505,0.464,0.499	0.298,0.433,0.169	0.189
2581	"ENSG00000075711"	"DLG1"	chr3	-	197075836	197075870	197076585	197076685	197066703	197066754	197081050	197081117	2581	10,8,0	1,1,1	0,3,5	5,2,2	249	183	0.0200633	0.37333	0.88,0.855,0.0	0.0,0.524,0.648	0.188
5536	"ENSG00000113108"	"APBB3"	chr5	-	140560312	140560504	140560638	140560754	140558268	140558821	140561017	140561101	5536	10,26,31	14,9,10	17,9,12	12,14,21	265	298	0.0472398	0.540832	0.445,0.765,0.777	0.614,0.42,0.391	0.187
865	"ENSG00000099381"	"SETD1A"	chr16	+	30961266	30961537	30963432	30963554	30959090	30959186	30964093	30964323	865	33,47,36	28,46,30	20,30,30	55,45,53	298	271	0.000529062	0.0402269	0.517,0.482,0.522	0.249,0.377,0.34	0.185
3949	"ENSG00000187688"	"TRPV2"	chr17	+	16428316	16428387	16431783	16431850	16427448	16427547	16431965	16432300	3949	4,1,1	0,0,2	4,2,1	4,5,0	220	216	0.00481375	0.165849	1.0,1.0,0.329	0.495,0.282,1.0	0.184
1888	"ENSG00000173715"	"C11orf80"	chr11	+	66762078	66762450	66788159	66788273	66759042	66759096	66796280	66796364	1888	4,4,1	6,14,5	2,0,0	8,6,11	298	263	0.000561345	0.0419582	0.37,0.201,0.15	0.181,0.0,0.0	0.18
5214	"ENSG00000123485"	"HJURP"	chr2	-	233847396	233847461	233849762	233849859	233845727	233845820	233852564	233852620	5214	28,34,15	17,14,9	23,11,11	12,20,16	246	214	0.0424563	0.518649	0.589,0.679,0.592	0.625,0.324,0.374	0.179
4989	"ENSG00000006611"	"USH1C"	chr11	-	17531398	17531542	17533254	17533322	17531153	17531292	17544271	17544400	4989	35,65,56	53,48,69	44,47,21	101,72,75	217	293	0.00409747	0.1545	0.471,0.646,0.523	0.37,0.468,0.274	0.176
2160	"ENSG00000136940"	"PDCL"	chr9	-	122823015	122823197	122826615	122826792	122818096	122820636	122828470	122828588	2160	27,18,27	19,18,29	8,18,26	32,30,29	298	298	0.0295917	0.44467	0.587,0.5,0.482	0.2,0.375,0.473	0.174
2280	"ENSG00000177119"	"ANO6"	chr12	+	45421070	45421273	45422956	45423062	45416698	45416904	45429104	45431782	2280	18,17,43	14,9,9	15,11,18	15,13,13	298	255	0.035702	0.492018	0.524,0.618,0.803	0.461,0.42,0.542	0.174
6743	"ENSG00000117139"	"KDM5B"	chr1	-	202764048	202764145	202766925	202767060	202762698	202762808	202773117	202773288	6743	25,21,17	2,2,8	25,11,17	6,8,9	284	246	0.0480025	0.540832	0.915,0.901,0.648	0.783,0.544,0.621	0.172
1302	"ENSG00000102796"	"DHRS12"	chr13	-	51769155	51769293	51771820	51771911	51767992	51768296	51773929	51774034	1302	3,14,11	5,11,9	5,9,5	12,15,11	240	287	0.048074	0.540832	0.418,0.603,0.594	0.333,0.418,0.352	0.171
5928	"ENSG00000112679"	"DUSP22"	chr6	+	311879	311962	335113	335163	304627	304661	345853	345928	5928	7,29,29	3,10,14	17,18,18	9,22,15	232	199	0.0296965	0.44467	0.667,0.713,0.64	0.618,0.412,0.507	0.161
131	"ENSG00000183597"	"TANGO2"	chr22	+	20053436	20053551	20061529	20061683	20052464	20052584	20063337	20063442	131	41,30,47	40,38,69	25,32,28	75,50,84	264	298	0.00309679	0.130065	0.536,0.471,0.435	0.273,0.419,0.273	0.159
553	"ENSG00000101773"	"RBBP8"	chr18	+	23016827	23016924	23022128	23022270	23006362	23006432	23026142	23026486	553	38,18,9	41,18,8	17,16,10	35,40,13	246	291	0.017009	0.33941	0.523,0.542,0.571	0.365,0.321,0.476	0.158
3143	"ENSG00000204634"	"TBC1D8"	chr2	-	101029490	101029776	101032267	101032385	101028302	101028432	101033543	101033758	3143	30,25,36	20,28,24	14,29,14	36,29,18	267	298	0.0410319	0.514707	0.626,0.499,0.626	0.303,0.527,0.465	0.152
6666	"ENSG00000168615"	"ADAM9"	chr8	+	39082967	39083073	39090046	39090188	39082640	39082721	39091258	39091346	6666	58,70,38	57,65,51	28,46,24	62,80,49	255	291	0.000874959	0.0579485	0.537,0.551,0.46	0.34,0.396,0.359	0.151
5090	"ENSG00000126249"	"PDCD2L"	chr19	+	34404648	34404815	34404929	34404990	34404398	34404538	34409160	34409510	5090	25,41,71	21,39,48	19,38,41	37,54,56	298	210	0.00144228	0.0794254	0.456,0.426,0.51	0.266,0.332,0.34	0.151
1750	"ENSG00000151503"	"NCAPD3"	chr11	-	134210269	134210454	134220571	134220726	134209312	134209477	134223862	134223941	1750	41,29,28	39,25,24	29,18,18	40,32,33	298	298	0.00865117	0.238448	0.512,0.537,0.538	0.42,0.36,0.353	0.151
16	"ENSG00000205581"	"HMGN1"	chr21	-	39345829	39345958	39347915	39347952	39345145	39345274	39348291	39348339	16	0,6,0	22,11,5	0,0,0	10,8,5	186	278	0.0107945	0.280022	0.0,0.449,0.0	0.0,0.0,0.0	0.15
2228	"ENSG00000166900"	"STX3"	chr11	+	59773210	59773294	59787036	59787136	59755375	59755635	59788872	59788947	2228	6,15,26	11,25,40	7,12,9	18,54,31	233	249	0.00472691	0.164268	0.368,0.391,0.41	0.294,0.192,0.237	0.149
2900	"ENSG00000236675"	"MTX1P1"	chr1	+	155233319	155233396	155233863	155234018	155233010	155233193	155234110	155234325	2900	2,2,5	11,14,8	3,2,4	118,9,48	226	298	0.012856	0.299459	0.193,0.159,0.452	0.032,0.227,0.099	0.149
3668	"ENSG00000167733"	"HSD11B1L"	chr19	+	5684988	5685119	5686415	5686527	5684818	5684905	5686899	5686991	3668	26,20,7	4,4,0	43,16,10	17,3,4	280	261	0.0334438	0.480414	0.858,0.823,1.0	0.702,0.833,0.7	0.149
1378	"ENSG00000177084"	"POLE"	chr12	-	132680177	132680222	132680606	132680687	132679953	132680046	132681137	132681279	1378	43,49,22	8,20,2	27,34,34	12,15,16	230	194	0.0494273	0.550441	0.819,0.674,0.903	0.655,0.657,0.642	0.147
5009	"ENSG00000183780"	"SLC35F3"	chr1	+	234231416	234231741	234309100	234309320	233905528	233905758	234316601	234316727	5009	30,40,34	2,1,2	32,23,24	1,11,7	298	298	0.000582923	0.0428448	0.938,0.976,0.944	0.97,0.676,0.774	0.146
6346	"ENSG00000165055"	"METTL2B"	chr7	+	128498035	128498142	128500902	128500968	128493803	128493943	128501761	128502126	6346	9,23,33	16,30,49	14,19,0	19,46,39	256	215	0.0167622	0.33858	0.321,0.392,0.361	0.382,0.258,0.0	0.145
6792	"ENSG00000249859"	"PVT1"	chr8	+	128010317	128010444	128070159	128070361	128009589	128009718	128096520	128096654	6792	37,44,32	0,0,0	32,56,19	5,5,6	276	298	7.0307e-07	0.000775135	1.0,1.0,1.0	0.874,0.924,0.774	0.143
2225	"ENSG00000173264"	"GPR137"	chr11	+	64287720	64287946	64288064	64288214	64286964	64287014	64288339	64288468	2225	32,27,42	31,34,39	28,31,22	65,45,44	298	298	0.00509653	0.17157	0.508,0.443,0.519	0.301,0.408,0.333	0.143
3993	"ENSG00000160191"	"PDE9A"	chr21	+	42731769	42731949	42732069	42732124	42698967	42699011	42733355	42733426	3993	12,34,27	32,33,20	35,19,16	46,85,41	298	204	0.0393928	0.509512	0.204,0.414,0.48	0.342,0.133,0.211	0.137
4112	"ENSG00000078304"	"PPP2R5C"	chr14	+	101909588	101909690	101912400	101912473	101906401	101906529	101925140	101927519	4112	52,24,51	7,1,4	44,41,47	10,15,8	251	222	0.00300119	0.127262	0.868,0.955,0.919	0.796,0.707,0.839	0.133
3117	"ENSG00000147649"	"MTDH"	chr8	+	97699753	97699852	97706625	97706750	97690951	97691188	97713661	97713769	3117	26,16,24	32,14,25	22,28,9	36,51,17	248	274	0.0441933	0.528164	0.473,0.558,0.515	0.403,0.378,0.369	0.132
4291	"ENSG00000127990"	"SGCE"	chr7	-	94599696	94599723	94600645	94600857	94598774	94598963	94603289	94603452	4291	15,31,21	2,1,3	14,16,19	2,3,7	298	176	0.0390688	0.509512	0.816,0.948,0.805	0.805,0.759,0.616	0.13
1457	"ENSG00000127314"	"RAP1B"	chr12	+	68651994	68652051	68654111	68654252	68650399	68650468	68656305	68656449	1457	23,22,25	54,45,69	16,18,8	60,61,56	206	290	0.017917	0.348079	0.375,0.408,0.338	0.273,0.293,0.167	0.129
5933	"ENSG00000163719"	"MTMR14"	chr3	+	9662266	9662285	9668718	9668794	9653620	9653769	9669431	9669492	5933	24,30,58	37,58,88	19,18,28	48,67,70	168	225	0.0069133	0.207399	0.465,0.409,0.469	0.346,0.265,0.349	0.128
3457	"ENSG00000130695"	"CEP85"	chr1	+	26244165	26244318	26255170	26255865	26239761	26239838	26257596	26257730	3457	47,62,50	37,38,25	39,26,55	44,34,43	298	298	0.0253982	0.421076	0.56,0.62,0.667	0.47,0.433,0.561	0.128
1264	"ENSG00000101019"	"UQCC1"	chr20	-	35366556	35366614	35381917	35382025	35347163	35347272	35394091	35394196	1264	2,2,7	11,16,14	0,1,3	31,19,26	257	207	0.00202058	0.0979202	0.128,0.091,0.287	0.0,0.041,0.085	0.127
3691	"ENSG00000122678"	"POLM"	chr7	-	44073782	44074025	44076508	44076629	44073624	44073708	44078739	44078811	3691	24,24,27	61,43,43	34,9,12	79,69,37	270	298	0.0261338	0.423713	0.303,0.381,0.409	0.322,0.126,0.264	0.127
1647	"ENSG00000052749"	"RRP12"	chr10	-	97390422	97390539	97393683	97393760	97388488	97388624	97396217	97396301	1647	46,62,80	40,95,131	45,38,56	105,75,127	226	266	0.0126817	0.299459	0.575,0.434,0.418	0.335,0.374,0.342	0.125
3977	"ENSG00000116062"	"MSH6"	chr2	+	47795893	47796063	47798610	47801155	47790926	47791123	47803419	47803685	3977	27,11,22	30,16,20	21,18,15	29,44,32	298	298	0.0402136	0.514707	0.474,0.407,0.524	0.42,0.29,0.319	0.125
1459	"ENSG00000125686"	"MED1"	chr17	-	39445410	39445569	39447797	39447904	39443549	39443628	39451037	39451272	1459	22,14,14	0,0,0	21,16,9	0,2,4	256	298	0.0192363	0.360987	1.0,1.0,1.0	1.0,0.903,0.724	0.124
740	"ENSG00000141580"	"WDR45B"	chr17	-	82630920	82631022	82643948	82644023	82627203	82627291	82648273	82648444	740	31,39,65	25,49,54	20,38,58	40,63,67	224	251	0.0364939	0.495034	0.581,0.471,0.574	0.359,0.403,0.492	0.124
1321	"ENSG00000174032"	"SLC25A30"	chr13	-	45408926	45409074	45411361	45411480	45405882	45405977	45418299	45418380	1321	7,0,4	12,8,9	2,2,0	17,7,14	268	297	0.0237235	0.410277	0.393,0.0,0.33	0.115,0.24,0.0	0.123
6091	"ENSG00000132388"	"UBE2G1"	chr17	-	4296716	4296814	4307020	4307123	4289229	4289408	4366270	4366628	6091	11,39,33	13,25,31	14,19,28	22,35,31	252	247	0.0464486	0.539048	0.453,0.605,0.511	0.384,0.347,0.47	0.123
6063	"ENSG00000115762"	"PLEKHB2"	chr2	+	131130720	131130760	131132901	131133015	131126683	131126786	131140166	131140275	6063	43,41,87	4,6,22	37,40,57	17,15,22	189	263	0.00232132	0.108598	0.937,0.905,0.846	0.752,0.788,0.783	0.122
2385	"ENSG00000077942"	"FBLN1"	chr22	+	45547084	45547204	45548612	45548744	45543400	45543526	45550491	45550615	2385	54,75,45	53,90,47	48,34,35	73,82,53	269	281	0.00899722	0.244924	0.516,0.465,0.5	0.407,0.302,0.408	0.121
3107	"ENSG00000288637"	"AC013477"	chr4	+	153397218	153397333	153408970	153409015	153358473	153358622	153414750	153414975	3107	12,4,0	54,7,10	3,0,0	23,12,5	264	194	0.00760941	0.217906	0.14,0.296,0.0	0.087,0.0,0.0	0.116
990	"ENSG00000140612"	"SEC11A"	chr15	-	84687624	84687774	84691534	84691644	84670724	84670782	84716024	84716063	990	110,86,124	11,14,17	84,81,96	19,31,35	259	298	2.92161e-05	0.0086934	0.92,0.876,0.894	0.836,0.75,0.759	0.115
6300	"ENSG00000168255"	"POLR2J3"	chr7	-	102566996	102567083	102569834	102569924	102541500	102541662	102572471	102572539	6300	0,0,10	3,15,19	0,0,0	12,26,20	239	236	0.000171989	0.0204993	0.0,0.0,0.342	0.0,0.0,0.0	0.114
6668	"ENSG00000168575"	"SLC20A2"	chr8	-	42436988	42437577	42439449	42439653	42430063	42430249	42444645	42444762	6668	16,77,63	10,46,42	15,44,52	14,46,52	298	298	0.0202366	0.374945	0.615,0.626,0.6	0.517,0.489,0.5	0.112
3378	"ENSG00000228794"	"LINC01128"	chr1	+	847653	847806	849483	849602	829002	829104	850180	850351	3378	2,10,6	1,0,0	2,3,9	0,6,0	298	268	0.044559	0.530042	0.643,1.0,1.0	1.0,0.31,1.0	0.111
4204	"ENSG00000185104"	"FAF1"	chr1	-	50596120	50596216	50655441	50655528	50584684	50584811	50705785	50705891	4204	38,55,26	40,50,23	45,28,30	52,48,46	236	245	0.0463951	0.539048	0.497,0.533,0.54	0.473,0.377,0.404	0.105
2888	"ENSG00000138443"	"ABI2"	chr2	+	203366876	203367044	203380207	203380384	203328279	203328631	203391045	203391143	2888	39,134,112	24,87,86	42,76,60	48,71,59	298	298	0.0214322	0.386841	0.619,0.606,0.566	0.467,0.517,0.504	0.101
57	"ENSG00000248405"	"PRR5-ARHGAP8"	chr22	+	44714590	44714671	44725243	44725292	44702232	44702608	44726576	44726634	57	52,55,61	61,61,59	81,80,42	59,51,34	230	198	0.0156133	0.331161	0.423,0.437,0.471	0.542,0.575,0.515	-0.1
6127	"ENSG00000136238"	"RAC1"	chr7	+	6387211	6387283	6391923	6392041	6374526	6374770	6400125	6400188	6127	81,104,342	703,1187,1263	253,301,258	840,924,1114	221	267	5.46302e-06	0.00323582	0.122,0.096,0.247	0.267,0.282,0.219	-0.101
626	"ENSG00000062716"	"VMP1"	chr17	+	59808795	59808876	59811669	59811786	59773753	59773885	59817711	59817773	626	30,31,41	55,48,89	30,38,51	38,45,60	230	266	0.0208014	0.382225	0.387,0.428,0.348	0.477,0.494,0.496	-0.101
4131	"ENSG00000130958"	"SLC35D2"	chr9	-	96364463	96364550	96368271	96368305	96360153	96360221	96383476	96383678	4131	0,1,3	23,48,47	2,6,7	26,48,41	183	236	0.00145883	0.0794254	0.0,0.026,0.076	0.09,0.139,0.18	-0.102
5429	"ENSG00000143179"	"UCK2"	chr1	+	165903181	165903279	165905920	165905969	165895584	165896332	165907683	165907871	5429	67,113,113	73,59,67	118,138,115	45,72,54	247	198	0.0421829	0.517038	0.424,0.606,0.575	0.678,0.606,0.631	-0.103
6502	"ENSG00000225470"	"JPX"	chrX	+	73946998	73947374	73994839	73994961	73944583	73944662	73998767	73998844	6502	17,16,21	5,3,4	25,20,15	2,1,2	298	271	0.0299203	0.44467	0.756,0.829,0.827	0.919,0.948,0.872	-0.109
3271	"ENSG00000177479"	"ARIH2"	chr3	+	48927461	48927813	48945135	48945181	48922747	48922811	48961611	48961679	3271	34,80,131	7,6,3	53,106,86	0,2,1	298	195	0.000136633	0.0194371	0.761,0.897,0.966	1.0,0.972,0.983	-0.11
226	"ENSG00000079435"	"LIPE"	chr19	-	42408231	42408322	42410306	42410842	42408086	42408121	42423418	42424123	226	56,72,68	40,53,33	105,75,69	43,25,32	298	240	0.0145725	0.318142	0.53,0.522,0.624	0.663,0.707,0.635	-0.11
6599	"ENSG00000165006"	"UBAP1"	chr9	+	34220907	34220948	34241184	34242108	34179042	34179240	34249778	34249961	6599	2,5,19	35,109,148	9,9,27	39,94,125	190	298	0.0166657	0.33858	0.082,0.067,0.168	0.266,0.131,0.253	-0.111
3447	"ENSG00000114416"	"FXR1"	chr3	+	180970157	180970358	180975312	180975404	180968050	180968254	180976121	180977155	3447	176,95,110	48,28,34	152,172,76	43,32,1	298	241	0.0187101	0.354127	0.748,0.733,0.723	0.741,0.813,0.984	-0.111
2827	"ENSG00000135919"	"SERPINE2"	chr2	-	223977543	223977627	223980310	223980397	223975044	223975904	223982680	223982781	2827	32,26,24	46,58,34	43,44,27	36,51,31	236	233	0.0273084	0.429608	0.407,0.307,0.411	0.541,0.46,0.462	-0.113
5896	"ENSG00000126226"	"PCID2"	chr13	-	113185484	113185560	113190871	113190975	113184345	113184487	113195070	113195125	5896	18,37,28	28,50,42	28,54,36	29,37,38	253	225	0.0266606	0.424475	0.364,0.397,0.372	0.462,0.565,0.457	-0.117
5764	"ENSG00000186470"	"BTN3A2"	chr6	+	26370321	26370603	26372896	26373097	26368720	26368912	26373275	26373296	5764	8,8,19	0,6,3	2,11,5	0,3,0	298	298	0.0446241	0.530042	1.0,0.571,0.864	1.0,0.786,1.0	-0.117
2096	"ENSG00000188566"	"NDOR1"	chr9	+	137212501	137212599	137213779	137213878	137206231	137206309	137214203	137214413	2096	28,26,24	4,6,5	32,41,26	2,1,1	247	248	0.000523792	0.0402269	0.875,0.813,0.828	0.941,0.976,0.963	-0.121
6546	"ENSG00000160949"	"TONSL"	chr8	-	144440717	144440870	144440965	144441111	144440350	144440476	144442036	144442151	6546	51,43,19	114,71,35	104,52,19	110,47,30	295	298	0.00431424	0.157238	0.311,0.38,0.354	0.489,0.528,0.39	-0.121
3941	"ENSG00000117682"	"DHDDS"	chr1	+	26457790	26457905	26460036	26460144	26447558	26447660	26468894	26469226	3941	25,56,62	47,76,87	54,49,64	53,40,64	264	257	0.00957841	0.257566	0.341,0.418,0.41	0.498,0.544,0.493	-0.122
4317	"ENSG00000114054"	"PCCB"	chr3	+	136256554	136256623	136260478	136260535	136255855	136255975	136261951	136262065	4317	34,54,45	33,63,64	48,70,67	34,40,60	218	206	0.00886546	0.242837	0.493,0.448,0.399	0.572,0.623,0.513	-0.123
6533	"ENSG00000112787"	"FBRSL1"	chr12	+	132525733	132525823	132548002	132548032	132508152	132508350	132567480	132567526	6533	18,45,47	6,11,9	44,28,38	4,8,0	239	179	0.0363239	0.494409	0.692,0.754,0.796	0.892,0.724,1.0	-0.125
2013	"ENSG00000151348"	"EXT2"	chr11	+	44171610	44171742	44197828	44198018	44130044	44130138	44206792	44206959	2013	45,105,70	47,67,59	53,82,187	24,57,57	281	298	0.00700069	0.208602	0.504,0.624,0.557	0.701,0.604,0.777	-0.132
6271	"ENSG00000004864"	"SLC25A13"	chr7	-	96277195	96277338	96296897	96296951	96208837	96208977	96321941	96322136	6271	3,8,4	0,4,1	1,1,3	0,0,0	203	292	0.0266715	0.424475	1.0,0.742,0.852	1.0,1.0,1.0	-0.135
4267	"ENSG00000176092"	"CRYBG2"	chr1	-	26331488	26331618	26336094	26336207	26328608	26328873	26336337	26336383	4267	9,16,18	38,53,38	32,17,29	45,53,30	262	279	0.0449514	0.530042	0.201,0.243,0.335	0.431,0.255,0.507	-0.138
4416	"ENSG00000284770"	"TBCE"	chr1	+	235414432	235414618	235427139	235427239	235380018	235380149	235430704	235430804	4416	0,1,0	7,5,15	2,6,2	5,18,14	298	249	0.000182025	0.0208195	0.0,0.143,0.0	0.251,0.218,0.107	-0.144
1990	"ENSG00000183426"	"NPIPA1"	chr16	+	14948929	14949037	14950049	14950110	14945836	14945981	14950219	14950255	1990	28,8,1	6,4,0	8,10,8	0,0,1	257	210	0.000127174	0.0186945	0.792,0.62,1.0	1.0,1.0,0.867	-0.152
3402	"ENSG00000121957"	"GPSM2"	chr1	+	108918612	108918789	108922416	108922576	108914337	108914408	108923999	108924214	3402	14,11,8	33,22,29	31,38,8	32,36,19	298	298	0.0175653	0.345817	0.298,0.333,0.216	0.492,0.514,0.296	-0.152
839	"ENSG00000141084"	"RANBP10"	chr16	-	67738012	67738035	67744264	67744455	67734857	67735042	67772033	67772086	839	18,43,33	1,4,6	12,30,42	0,0,0	298	172	5.75774e-06	0.00323582	0.912,0.861,0.76	1.0,1.0,1.0	-0.156
5213	"ENSG00000186522"	"SEPTIN10"	chr2	-	109567814	109567976	109593050	109593119	109565762	109565859	109613797	109613835	5213	5,8,5	48,40,37	12,8,14	44,51,18	218	298	0.038273	0.506859	0.125,0.215,0.156	0.272,0.177,0.515	-0.156
4830	"ENSG00000198707"	"CEP290"	chr12	-	88059897	88060020	88060829	88060994	88058847	88059020	88062691	88062778	4830	0,1,1	3,3,0	3,2,7	3,6,0	298	272	0.00473061	0.164268	0.0,0.233,1.0	0.477,0.233,1.0	-0.159
810	"ENSG00000103248"	"MTHFSD"	chr16	-	86552032	86552146	86554644	86554751	86548463	86548577	86555168	86555235	810	1,2,0	5,2,5	3,8,4	15,6,6	256	263	0.0283222	0.442247	0.17,0.507,0.0	0.17,0.578,0.406	-0.159
6585	"ENSG00000189376"	"C8orf76"	chr8	-	123226499	123226632	123231299	123231757	123219966	123220297	123237797	123237941	6585	58,49,88	45,52,44	66,91,64	12,33,41	298	282	0.0130905	0.299459	0.549,0.471,0.654	0.839,0.723,0.596	-0.161
2656	"ENSG00000161010"	"MRNIP"	chr5	-	179844151	179844227	179847977	179848066	179841906	179842064	179853196	179853276	2656	0,0,0	10,12,25	6,1,4	18,14,15	238	225	5.16734e-06	0.00323582	0.0,0.0,0.0	0.24,0.063,0.201	-0.168
2060	"ENSG00000132256"	"TRIM5"	chr11	-	5665980	5666081	5667688	5667711	5665655	5665682	5678203	5678434	2060	1,2,2	20,17,25	9,5,0	16,12,21	172	250	0.032812	0.472982	0.068,0.146,0.104	0.45,0.377,0.0	-0.17
1038	"ENSG00000128923"	"MINDY2"	chr15	+	58821716	58821819	58831773	58831916	58810229	58810388	58847296	58847470	1038	1,5,2	3,1,1	1,4,1	0,1,1	252	292	0.0151271	0.328623	0.279,0.853,0.699	1.0,0.823,0.537	-0.176
5583	"ENSG00000133706"	"LARS1"	chr5	-	146168127	146168265	146171909	146171990	146164309	146164471	146172686	146172774	5583	27,15,16	44,15,10	34,27,19	12,27,4	230	287	0.0310646	0.458178	0.434,0.555,0.666	0.78,0.555,0.856	-0.179
4855	"ENSG00000137648"	"TMPRSS4"	chr11	+	118098984	118099098	118103100	118103253	118094821	118094855	118104690	118104820	4855	1,4,3	0,3,2	1,2,3	0,0,1	263	298	0.0059539	0.189413	1.0,0.602,0.63	1.0,1.0,0.773	-0.18
2707	"ENSG00000030582"	"GRN"	chr17	+	44345530	44345605	44346088	44346228	44345301	44345334	44349157	44349302	2707	19,35,30	4,8,30	16,48,41	1,7,1	224	289	0.00012306	0.0186945	0.86,0.85,0.563	0.954,0.898,0.981	-0.187
5044	"ENSG00000135040"	"NAA35"	chr9	+	85996398	85996577	86003584	86003644	85978266	85978381	86007357	86007464	5044	13,15,8	16,13,20	16,12,21	12,11,7	298	209	0.0413962	0.514707	0.363,0.447,0.219	0.483,0.433,0.678	-0.188
636	"ENSG00000153944"	"MSI2"	chr17	+	57401378	57401471	57529675	57529724	57262150	57262192	57596867	57596950	636	10,34,32	9,16,15	40,32,33	13,8,5	242	198	0.015323	0.329631	0.476,0.635,0.636	0.716,0.766,0.844	-0.193
3854	"ENSG00000132677"	"RHBG"	chr1	+	156374606	156374729	156382067	156382201	156369211	156369436	156382747	156382869	3854	0,0,0	6,3,12	0,2,4	9,10,6	272	283	0.00281866	0.121923	0.0,0.0,0.0	0.0,0.172,0.41	-0.194
894	"ENSG00000062725"	"APPBP2"	chr17	-	60456295	60456381	60460662	60460787	60454301	60454492	60461809	60461915	894	11,10,20	8,3,17	15,19,11	2,2,6	274	235	0.0186467	0.354127	0.541,0.741,0.502	0.865,0.891,0.611	-0.194
6066	"ENSG00000164674"	"SYTL3"	chr6	+	158713799	158713878	158718086	158718211	158708321	158708391	158725502	158725637	6066	6,12,4	38,61,42	11,11,12	27,24,26	228	274	0.000720676	0.0515597	0.159,0.191,0.103	0.329,0.355,0.357	-0.196
4120	"ENSG00000085999"	"RAD54L"	chr1	+	46258685	46258746	46259963	46260099	46249999	46250119	46260541	46260611	4120	13,31,6	14,21,10	33,41,33	25,15,8	210	285	0.0258206	0.423302	0.558,0.667,0.449	0.642,0.788,0.848	-0.201
3520	"ENSG00000160746"	"ANO10"	chr3	-	43576691	43577261	43580352	43580472	43574808	43574864	43598531	43598666	3520	1,10,7	15,21,28	7,19,26	14,25,35	269	298	0.0079385	0.222986	0.069,0.345,0.217	0.356,0.457,0.451	-0.211
466	"ENSG00000078747"	"ITCH"	chr20	+	34393790	34393881	34408650	34408792	34369393	34369470	34412514	34412639	466	11,1,2	16,18,11	14,8,4	21,14,5	240	291	0.0467724	0.540832	0.455,0.063,0.181	0.447,0.409,0.492	-0.216
1326	"ENSG00000170919"	"TPT1-AS1"	chr13	+	45379925	45380001	45381141	45381217	45379194	45379335	45383090	45383169	1326	1,20,0	0,0,16	6,4,5	1,1,0	225	225	0.0353495	0.488687	1.0,1.0,0.0	0.857,0.8,1.0	-0.219
1437	"ENSG00000058272"	"PPP1R12A"	chr12	-	79805591	79805768	79806165	79806333	79798493	79798584	79807225	79807330	1437	0,3,3	18,6,18	10,8,0	5,9,7	298	298	0.0294233	0.44467	0.0,0.333,0.143	0.667,0.471,0.0	-0.221
2414	"ENSG00000134470"	"IL15RA"	chr10	-	5963742	5963841	5966144	5966339	5960366	5960567	5977404	5977492	2414	4,16,33	14,26,43	18,37,35	25,15,24	298	248	0.0184668	0.354081	0.192,0.339,0.39	0.375,0.672,0.548	-0.225
1749	"ENSG00000151498"	"ACAD8"	chr11	+	134257087	134257257	134258514	134258624	134256547	134256648	134259007	134259084	1749	6,34,32	20,41,65	22,28,30	12,15,44	298	259	0.0161176	0.335845	0.207,0.419,0.3	0.614,0.619,0.372	-0.226
5452	"ENSG00000158062"	"UBXN11"	chr1	-	26301693	26301722	26302812	26302918	26297961	26298062	26306591	26306704	5452	0,0,0	13,4,6	2,2,3	4,6,6	255	178	9.53462e-05	0.0164997	0.0,0.0,0.0	0.259,0.189,0.259	-0.236
2135	"ENSG00000106976"	"DNM1"	chr9	+	128224250	128224389	128226034	128226173	128222792	128222860	128234020	128234107	2135	3,6,31	4,1,0	29,22,14	0,0,0	288	288	0.0351918	0.488687	0.429,0.857,1.0	1.0,1.0,1.0	-0.238
2093	"ENSG00000187609"	"EXD3"	chr9	-	137307607	137307646	137309606	137309700	137306895	137307263	137323724	137323856	2093	9,11,8	2,8,1	3,1,9	0,0,1	243	188	9.60953e-05	0.0164997	0.777,0.515,0.861	1.0,1.0,0.874	-0.24
172	"ENSG00000090554"	"FLT3LG"	chr19	+	49478962	49479047	49480297	49480476	49476422	49476566	49480551	49480620	172	3,0,0	21,7,15	8,3,6	22,12,15	234	298	0.000143327	0.0197522	0.154,0.0,0.0	0.317,0.241,0.337	-0.247
1178	"ENSG00000165501"	"LRR1"	chr14	+	49603551	49603618	49607399	49608121	49602369	49602468	49614255	49614671	1178	2,2,0	13,9,14	14,3,4	16,8,13	216	298	0.000931162	0.0586632	0.175,0.235,0.0	0.547,0.341,0.298	-0.259
4210	"ENSG00000279457"	"WASH9P"	chr1	-	185490	185559	186316	186469	185216	185350	187128	187287	4210	10,36,55	25,161,26	14,60,50	38,27,3	298	218	0.0477753	0.540832	0.226,0.141,0.607	0.212,0.619,0.924	-0.26
1712	"ENSG00000172661"	"WASHC2C"	chr10	+	45785508	45785631	45786611	45786674	45784820	45784901	45787034	45787247	1712	6,3,3	0,0,9	4,10,13	0,0,0	272	212	0.0144636	0.317335	1.0,1.0,0.206	1.0,1.0,1.0	-0.265
3149	"ENSG00000072135"	"PTPN18"	chr2	+	130358866	130358975	130359232	130359309	130356055	130356200	130359396	130359492	3149	21,7,17	9,15,17	19,27,23	4,2,19	258	226	0.0197099	0.368308	0.671,0.29,0.467	0.806,0.922,0.515	-0.272
6741	"ENSG00000102897"	"LYRM1"	chr16	+	20915555	20915714	20920121	20920214	20900234	20900535	20923999	20925004	6741	3,7,0	44,13,14	16,13,16	25,28,10	298	242	0.000265981	0.0259114	0.052,0.304,0.0	0.342,0.274,0.565	-0.275
3554	"ENSG00000177058"	"SLC38A9"	chr5	-	55649206	55649314	55656714	55656774	55645788	55645895	55664692	55664863	3554	0,1,4	8,4,4	1,9,4	5,4,2	209	257	0.0421601	0.517038	0.0,0.235,0.552	0.197,0.735,0.711	-0.285
1216	"ENSG00000092199"	"HNRNPC"	chr14	-	21236372	21236460	21262600	21262768	21233952	21234229	21263310	21263336	1216	5,4,8	1,9,0	9,15,2	0,1,0	298	237	0.000983975	0.0611173	0.799,0.261,1.0	1.0,0.923,1.0	-0.288
4155	"ENSG00000163138"	"PACRGL"	chr4	+	20709682	20709773	20712787	20712922	20707802	20707870	20713431	20713539	4155	3,5,2	5,9,6	7,6,4	2,6,3	240	284	0.0249673	0.419732	0.415,0.397,0.283	0.806,0.542,0.612	-0.288
4677	"ENSG00000064933"	"PMS1"	chr2	+	189863742	189863974	189867798	189867929	189854238	189855128	189873495	189873656	4677	27,2,2	21,2,1	19,7,5	7,1,0	298	280	0.0119314	0.297273	0.547,0.484,0.653	0.718,0.868,1.0	-0.301
2336	"ENSG00000157426"	"AASDH"	chr4	-	56378147	56378464	56382476	56382597	56371450	56371643	56384069	56384341	2336	1,6,0	6,3,9	3,14,4	13,4,1	270	298	0.0484101	0.543155	0.155,0.688,0.0	0.203,0.794,0.815	-0.323
977	"ENSG00000173575"	"CHD2"	chr15	+	92929029	92929091	92937517	92937625	92927243	92927330	92939577	92939718	977	2,7,4	6,21,4	4,9,3	1,6,2	211	257	0.00728132	0.213456	0.289,0.289,0.549	0.83,0.646,0.646	-0.332
6475	"ENSG00000162341"	"TPCN2"	chr11	+	69063894	69063967	69067502	69067605	69062883	69062990	69070429	69070495	6475	3,2,5	13,6,13	7,4,9	7,3,5	222	252	0.00138921	0.0775498	0.208,0.275,0.304	0.532,0.602,0.671	-0.339
5407	"ENSG00000049883"	"PTCD2"	chr5	+	72326611	72326741	72331257	72331375	72322171	72322264	72335017	72335096	5407	4,3,7	4,2,3	8,7,3	2,0,0	279	267	0.000204966	0.0225975	0.489,0.589,0.691	0.793,1.0,1.0	-0.341
5980	"ENSG00000175344"	"CHRNA7"	chr15	+	32111789	32111899	32153906	32153986	32101302	32101347	32157607	32157775	5980	8,7,2	2,3,3	4,13,11	0,2,0	259	229	0.000210658	0.0226586	0.78,0.674,0.371	1.0,0.852,1.0	-0.342
3845	"ENSG00000115594"	"IL1R1"	chr2	+	102165114	102165304	102166112	102166281	102164773	102165008	102168597	102168663	3845	0,10,7	2,4,5	2,2,5	1,1,0	298	298	0.00118773	0.0698383	0.0,0.714,0.583	0.667,0.667,1.0	-0.346
4337	"ENSG00000273331"	"TM4SF19-TCTEX1D2"	chr3	-	196324270	196324440	196326954	196327032	196323743	196323997	196327389	196327591	4337	0,0,2	8,16,15	0,6,2	15,3,3	227	298	0.0010167	0.06142	0.0,0.0,0.149	0.0,0.724,0.467	-0.347
2958	"ENSG00000010030"	"ETV7"	chr6	-	36375870	36376035	36385533	36385669	36373452	36373578	36387535	36387800	2958	9,4,14	9,18,17	16,11,12	8,3,4	285	298	0.000724875	0.0515597	0.511,0.189,0.463	0.677,0.793,0.758	-0.355
2462	"ENSG00000215114"	"UBXN2B"	chr8	+	58430518	58430669	58433159	58433243	58416849	58416953	58434394	58434504	2462	0,7,15	7,4,2	7,8,7	1,1,1	298	233	0.00619827	0.195245	0.0,0.578,0.854	0.846,0.862,0.846	-0.374
4863	"ENSG00000122481"	"RWDD3"	chr1	+	95244210	95244698	95246541	95246657	95234209	95234315	95246755	95247225	4863	2,4,1	7,6,3	6,3,4	0,3,4	298	265	0.0162211	0.335845	0.203,0.372,0.229	1.0,0.471,0.471	-0.379
4659	"ENSG00000116191"	"RALGPS2"	chr1	+	178821611	178821704	178833423	178833550	178811314	178811404	178877497	178877635	4659	2,0,1	9,4,7	1,4,1	3,2,1	242	276	0.00195232	0.0956634	0.202,0.0,0.14	0.275,0.695,0.533	-0.387
195	"ENSG00000105483"	"CARD8"	chr19	-	48249522	48249633	48249750	48249847	48240961	48241063	48255791	48255898	195	14,7,2	6,12,9	15,13,24	2,6,4	246	260	0.00137899	0.0775498	0.711,0.381,0.19	0.888,0.696,0.864	-0.389
5974	"ENSG00000112290"	"WASF1"	chr6	-	110160634	110160732	110178597	110178742	110127468	110127629	110179438	110180004	5974	0,0,2	1,3,3	1,2,1	1,1,1	294	247	0.0127059	0.299459	0.0,0.0,0.359	0.457,0.627,0.457	-0.394
4429	"ENSG00000131778"	"CHD1L"	chr1	+	147256530	147256562	147259836	147259918	147255812	147255927	147264421	147264584	4429	0,2,1	13,28,23	6,9,3	6,9,11	181	231	3.34706e-07	0.000510249	0.0,0.084,0.053	0.561,0.561,0.258	-0.414
1055	"ENSG00000128908"	"INO80"	chr15	-	41020899	41021125	41027595	41027736	41016087	41016215	41044903	41045075	1055	4,1,4	5,11,5	5,15,10	3,9,0	290	298	0.00170314	0.0883631	0.451,0.085,0.451	0.631,0.631,1.0	-0.425
5755	"ENSG00000010704"	"HFE"	chr6	+	26090840	26091104	26091313	26091589	26087280	26087516	26092684	26092960	5755	6,0,0	7,8,1	3,2,1	1,1,2	298	298	0.0222044	0.393258	0.462,0.0,0.0	0.75,0.667,0.333	-0.429
6537	"ENSG00000133519"	"ZDHHC8P1"	chr22	-	23392726	23392833	23393925	23394057	23391376	23391724	23399759	23400583	6537	0,0,0	3,1,1	0,5,2	1,0,4	281	256	0.000487789	0.0402269	0.0,0.0,0.0	0.0,1.0,0.313	-0.438
5483	"ENSG00000127507"	"ADGRE2"	chr19	-	14754953	14755127	14755653	14755877	14752328	14752526	14756237	14756345	5483	1,3,0	8,3,3	6,5,2	0,9,1	298	298	0.00411629	0.1545	0.111,0.5,0.0	1.0,0.357,0.667	-0.471
4227	"ENSG00000163681"	"SLMAP"	chr3	+	57865241	57865292	57871635	57871698	57864806	57864857	57890040	57890100	4227	0,2,0	7,2,5	2,0,4	0,6,0	200	212	0.000263285	0.0259114	0.0,0.515,0.0	1.0,0.0,1.0	-0.495
4987	"ENSG00000070759"	"TESK2"	chr1	-	45355302	45355449	45385911	45385960	45347917	45348000	45421724	45421846	4987	0,2,0	11,6,9	3,3,2	0,2,6	198	296	1.20942e-05	0.00444461	0.0,0.333,0.0	1.0,0.692,0.333	-0.564
5577	"ENSG00000163689"	"CFAP20DC"	chr3	-	58884544	58884709	58913707	58913864	58870172	58870309	58937647	58937762	5577	0,7,0	1,4,4	5,3,4	0,0,6	298	298	0.0045939	0.162073	0.0,0.636,0.0	1.0,1.0,0.4	-0.588
1296	"ENSG00000139734"	"DIAPH3"	chr13	-	60093627	60093732	60112009	60112186	60042689	60042820	60163586	60163766	1296	3,0,1	4,2,4	2,6,2	1,2,0	298	254	0.00026334	0.0259114	0.39,0.0,0.176	0.63,0.719,1.0	-0.594
3921	"ENSG00000138382"	"METTL5"	chr2	-	169819560	169819643	169821091	169821273	169812456	169812506	169824488	169824640	3921	0,2,0	7,2,4	1,1,1	0,0,2	298	232	0.00401941	0.154136	0.0,0.438,0.0	1.0,1.0,0.28	-0.614

## Sheet: RI
ID	GeneID	geneSymbol	chr	strand	riExonStart_0base	riExonEnd	upstreamES	upstreamEE	downstreamES	downstreamEE	ID	IJC_SAMPLE_1	SJC_SAMPLE_1	IJC_SAMPLE_2	SJC_SAMPLE_2	IncFormLen	SkipFormLen	PValue	FDR	IncLevel1	IncLevel2	IncLevelDifference
6109	"ENSG00000137343"	"ATAT1"	chr6	+	30642767	30644679	30642767	30643011	30643528	30644679	6109	4,4,2	0,0,0	0,2,0	1,1,1	298	149	4.80075e-05	0.00632706	1.0,1.0,1.0	0.0,0.5,0.0	0.833
1809	"ENSG00000100099"	"HPS4"	chr22	-	26465454	26466262	26465454	26465551	26466225	26466262	1809	1,5,4	0,4,0	0,3,0	4,14,1	298	149	3.24139e-05	0.00476485	1.0,0.385,1.0	0.0,0.097,0.0	0.763
3353	"ENSG00000128699"	"ORMDL1"	chr2	-	189782421	189783123	189782421	189782602	189783013	189783123	3353	2,1,4	0,14,0	0,0,0	7,5,6	298	149	0.000284717	0.023153	1.0,0.034,1.0	0.0,0.0,0.0	0.678
2256	"ENSG00000255508"	"AP002990"	chr11	-	62572583	62574908	62572583	62572742	62574676	62574908	2256	3,2,1	0,0,0	10,0,0	0,5,3	298	149	7.16412e-08	3.42266e-05	1.0,1.0,1.0	1.0,0.0,0.0	0.667
1073	"ENSG00000162004"	"CCDC78"	chr16	-	724910	725145	724910	724989	725077	725145	1073	11,11,11	1,8,0	5,2,0	14,3,1	237	149	6.52568e-05	0.00822546	0.874,0.464,1.0	0.183,0.295,0.0	0.62
1912	"ENSG00000188603"	"CLN3"	chr16	-	28487455	28488662	28487455	28487541	28488590	28488662	1912	10,2,1	0,0,10	1,2,0	4,5,6	298	149	0.000501456	0.0304217	1.0,1.0,0.048	0.111,0.167,0.0	0.59
531	"ENSG00000205744"	"DENND1C"	chr19	-	6475483	6475751	6475483	6475585	6475705	6475751	531	3,1,1	0,0,0	3,0,4	5,2,0	269	149	1.98565e-05	0.00316215	1.0,1.0,1.0	0.249,0.0,1.0	0.584
2440	"ENSG00000185101"	"ANO9"	chr11	-	419581	420860	419581	419729	420717	420860	2440	4,13,6	0,0,0	1,6,2	1,1,3	298	149	0.000114912	0.0114925	1.0,1.0,1.0	0.333,0.75,0.25	0.556
4652	"ENSG00000126088"	"UROD"	chr1	+	45013908	45014836	45013908	45014070	45014735	45014836	4652	5,6,9	2,2,1	0,7,0	4,6,2	298	149	0.000412307	0.026037	0.556,0.6,0.818	0.0,0.368,0.0	0.535
6735	"ENSG00000142327"	"RNPEPL1"	chr2	+	240573774	240574628	240573774	240573891	240574514	240574628	6735	3,1,2	0,1,0	6,0,0	0,1,2	298	149	0.000588995	0.0326252	1.0,0.333,1.0	1.0,0.0,0.0	0.444
3485	"ENSG00000183250"	"LINC01547"	chr21	-	44933314	44935096	44933314	44934368	44934933	44935096	3485	12,6,3	0,0,0	5,7,2	0,3,6	298	149	4.55108e-06	0.00124244	1.0,1.0,1.0	1.0,0.538,0.143	0.44
878	"ENSG00000103064"	"SLC7A6"	chr16	+	68297233	68301819	68297233	68297476	68298490	68301819	878	7,8,1	0,0,0	3,10,12	5,2,2	298	149	2.30032e-07	9.76871e-05	1.0,1.0,1.0	0.231,0.714,0.75	0.435
6184	"ENSG00000104783"	"KCNN4"	chr19	-	43768962	43769560	43768962	43769032	43769332	43769560	6184	16,20,5	1,0,0	15,11,3	14,0,3	298	149	1.63977e-05	0.0028433	0.889,1.0,1.0	0.349,1.0,0.333	0.402
3761	"ENSG00000185133"	"INPP5J"	chr22	+	31126612	31127532	31126612	31126721	31127356	31127532	3761	9,1,2	3,1,1	0,2,0	2,3,1	298	149	0.000115645	0.0114925	0.6,0.333,0.5	0.0,0.25,0.0	0.394
4932	"ENSG00000141959"	"PFKL"	chr21	+	44324855	44326060	44324855	44324917	44325960	44326060	4932	12,12,12	0,0,0	14,8,7	11,0,4	298	149	4.49441e-07	0.000171776	1.0,1.0,1.0	0.389,1.0,0.467	0.381
1512	"ENSG00000214078"	"CPNE1"	chr20	-	35630438	35631034	35630438	35630490	35630900	35631034	1512	5,4,3	0,0,1	3,5,14	3,5,1	298	149	7.07421e-05	0.00822546	1.0,1.0,0.6	0.333,0.333,0.875	0.353
2013	"ENSG00000150433"	"TMEM218"	chr11	-	125102131	125102809	125102131	125102351	125102733	125102809	2013	3,20,11	0,0,0	13,7,9	2,2,2	298	149	0.000147455	0.0137457	1.0,1.0,1.0	0.765,0.636,0.692	0.302
3940	"ENSG00000060971"	"ACAA1"	chr3	-	38125825	38126700	38125825	38125881	38126509	38126700	3940	6,9,15	3,6,16	2,2,7	5,16,17	298	149	0.00052975	0.031636	0.5,0.429,0.319	0.167,0.059,0.171	0.284
5597	"ENSG00000170291"	"ELP5"	chr17	+	7258587	7259940	7258587	7258683	7259570	7259940	5597	12,13,7	0,0,1	11,20,12	5,5,2	298	149	9.7915e-06	0.00220136	1.0,1.0,0.778	0.524,0.667,0.75	0.279
6358	"ENSG00000172732"	"MUS81"	chr11	+	65864719	65865145	65864719	65864815	65865114	65865145	6358	46,86,56	1,2,0	40,68,46	7,7,4	298	149	5.87627e-06	0.00149727	0.958,0.956,1.0	0.741,0.829,0.852	0.164
4440	"ENSG00000160055"	"TMEM234"	chr1	-	32216199	32216947	32216199	32216517	32216888	32216947	4440	24,36,41	0,0,2	30,31,33	1,3,8	298	149	0.00011727	0.0114925	1.0,1.0,0.911	0.938,0.838,0.673	0.154
3620	"ENSG00000011304"	"PTBP1"	chr19	+	804291	804702	804291	804438	804540	804702	3620	71,85,66	0,10,0	89,100,77	26,5,10	251	149	0.00111785	0.0493629	1.0,0.835,1.0	0.67,0.922,0.82	0.141
1757	"ENSG00000168701"	"TMEM208"	chr16	+	67228796	67229278	67228796	67228836	67228975	67229278	1757	84,76,176	3,3,7	100,88,90	7,13,13	288	149	0.000410539	0.026037	0.935,0.929,0.929	0.881,0.778,0.782	0.117
1978	"ENSG00000111364"	"DDX55"	chr12	+	123607431	123607662	123607431	123607523	123607599	123607662	1978	1,7,3	10,15,24	0,0,1	6,13,13	225	149	0.000234489	0.0199159	0.062,0.236,0.076	0.0,0.0,0.048	0.109
5543	"ENSG00000166987"	"MBD6"	chr12	+	57524028	57524416	57524028	57524092	57524279	57524416	5543	1,5,4	8,20,7	0,1,0	4,6,4	298	149	0.000835523	0.042018	0.059,0.111,0.222	0.0,0.077,0.0	0.105
359	"ENSG00000071564"	"TCF3"	chr19	-	1609289	1611849	1609289	1611369	1611703	1611849	359	196,360,236	38,49,40	232,248,270	56,77,72	298	149	0.000359364	0.0249234	0.721,0.786,0.747	0.674,0.617,0.652	0.104
2559	"ENSG00000167716"	"WDR81"	chr17	+	1735571	1736218	1735571	1735717	1736038	1736218	2559	0,0,2	6,11,11	6,5,3	13,13,26	298	149	0.000760084	0.0392573	0.0,0.0,0.083	0.188,0.161,0.055	-0.107
7039	"ENSG00000156983"	"BRPF1"	chr3	+	9745572	9745930	9745572	9745709	9745811	9745930	7039	3,4,6	17,34,66	4,18,13	24,26,41	251	149	0.00061689	0.0335397	0.095,0.065,0.051	0.09,0.291,0.158	-0.109
5720	"ENSG00000123473"	"STIL"	chr1	-	47299904	47300152	47299904	47299968	47300109	47300152	5720	14,13,10	2,3,1	29,13,2	0,1,0	290	149	0.000855266	0.0424523	0.782,0.69,0.837	1.0,0.87,1.0	-0.187
3533	"ENSG00000187017"	"ESPN"	chr1	+	6448640	6449091	6448640	6448802	6448892	6449091	3533	55,66,146	71,72,131	206,134,128	82,61,87	239	149	9.35012e-06	0.00220136	0.326,0.364,0.41	0.61,0.578,0.478	-0.189
3600	"ENSG00000167965"	"MLST8"	chr16	+	2206357	2206659	2206357	2206409	2206483	2206659	3600	39,22,7	2,9,2	45,23,10	3,0,0	223	149	0.000631831	0.0335397	0.929,0.62,0.7	0.909,1.0,1.0	-0.22
4966	"ENSG00000143575"	"HAX1"	chr1	+	154273335	154273961	154273335	154273598	154273749	154273961	4966	0,1,1	4,6,8	6,6,7	6,16,7	298	149	3.6202e-05	0.0051246	0.0,0.077,0.059	0.333,0.158,0.333	-0.229
4	"ENSG00000197381"	"ADARB1"	chr21	+	45222017	45226560	45222017	45222107	45225546	45226560	4	4,5,21	0,5,2	2,6,13	0,0,1	298	149	0.000975531	0.0460306	1.0,0.333,0.84	1.0,1.0,0.867	-0.231
5802	"ENSG00000100299"	"ARSA"	chr22	-	50627555	50628170	50627555	50627792	50627945	50628170	5802	9,32,42	5,4,17	17,41,53	3,3,1	298	149	0.000902628	0.0436689	0.474,0.8,0.553	0.739,0.872,0.964	-0.249
2904	"ENSG00000183010"	"PYCR1"	chr17	-	81936747	81937300	81936747	81936861	81937257	81937300	2904	65,51,36	20,27,12	75,59,62	16,5,3	298	149	0.000112784	0.0114925	0.619,0.486,0.6	0.701,0.855,0.912	-0.254
3179	"ENSG00000115677"	"HDLBP"	chr2	-	241268953	241269295	241268953	241269105	241269200	241269295	3179	7,4,6	4,0,3	9,10,5	0,1,0	244	149	4.36731e-05	0.00596137	0.517,1.0,0.55	1.0,0.859,1.0	-0.264
6759	"ENSG00000158411"	"MITD1"	chr2	-	99169262	99169610	99169262	99169470	99169549	99169610	6759	0,0,0	14,11,18	4,2,3	8,3,5	228	149	2.08051e-06	0.000709943	0.0,0.0,0.0	0.246,0.303,0.282	-0.277
4914	"ENSG00000263072"	"ZNF213-AS1"	chr16	-	3129247	3129653	3129247	3129310	3129460	3129653	4914	4,5,13	0,4,2	4,7,4	0,0,0	298	149	0.000409188	0.026037	1.0,0.385,0.765	1.0,1.0,1.0	-0.283
914	"ENSG00000206140"	"TMEM191C"	chr22	+	21467893	21468431	21467893	21468202	21468314	21468431	914	13,6,2	3,0,3	15,11,7	0,1,0	261	149	0.00112148	0.0493629	0.712,1.0,0.276	1.0,0.863,1.0	-0.292
2684	"ENSG00000162032"	"SPSB3"	chr16	-	1777746	1778612	1777746	1777872	1778133	1778612	2684	4,8,12	3,3,1	10,10,5	2,0,0	298	149	0.000880464	0.0431428	0.4,0.571,0.857	0.714,1.0,1.0	-0.295
444	"ENSG00000061656"	"SPAG4"	chr20	+	35618449	35618720	35618449	35618475	35618611	35618720	444	10,5,7	20,13,14	18,9,9	15,4,4	285	149	0.00111982	0.0493629	0.207,0.167,0.207	0.386,0.541,0.541	-0.296
975	"ENSG00000168488"	"ATXN2L"	chr16	+	28835277	28835758	28835277	28835399	28835554	28835758	975	5,10,7	8,0,4	16,19,11	0,0,1	298	149	1.6463e-05	0.0028433	0.238,1.0,0.467	1.0,1.0,0.846	-0.38
7062	"ENSG00000175061"	"SNHG29"	chr17	+	16439036	16439414	16439036	16439060	16439326	16439414	7062	53,41,43	424,458,366	60,148,198	409,221,0	298	149	7.31726e-05	0.00822546	0.059,0.043,0.055	0.068,0.251,1.0	-0.387
6532	"ENSG00000223705"	"NSUN5P1"	chr7	+	75415591	75416191	75415591	75415770	75415980	75416191	6532	0,1,0	11,6,3	4,6,1	8,0,10	298	149	0.000624117	0.0335397	0.0,0.077,0.0	0.2,1.0,0.048	-0.39
4129	"ENSG00000187531"	"SIRT7"	chr17	-	81914293	81915512	81914293	81914530	81915439	81915512	4129	4,5,13	1,5,3	2,6,14	0,0,1	298	149	1.15601e-05	0.00230699	0.667,0.333,0.684	1.0,1.0,0.875	-0.397
1593	"ENSG00000139428"	"MMAB"	chr12	-	109561039	109561329	109561039	109561104	109561242	109561329	1593	5,1,3	7,14,0	10,8,8	1,2,0	287	149	0.00107345	0.0493629	0.271,0.036,1.0	0.838,0.675,1.0	-0.402
3551	"ENSG00000183323"	"CCDC125"	chr5	-	69320236	69320580	69320236	69320345	69320464	69320580	3551	8,2,19	5,3,0	14,6,12	0,0,0	268	149	1.71104e-05	0.0028433	0.471,0.27,1.0	1.0,1.0,1.0	-0.42
4304	"ENSG00000182199"	"SHMT2"	chr12	+	57232210	57232575	57232210	57232292	57232424	57232575	4304	0,1,0	6,12,4	1,4,3	7,0,4	281	149	0.000572364	0.0321702	0.0,0.042,0.0	0.07,1.0,0.285	-0.438
1231	"ENSG00000137841"	"PLCB2"	chr15	-	40290576	40290837	40290576	40290672	40290760	40290837	1231	1,5,6	3,2,5	4,6,3	2,0,0	237	149	0.000275078	0.0228554	0.173,0.611,0.43	0.557,1.0,1.0	-0.448
5870	"ENSG00000113108"	"APBB3"	chr5	-	140561586	140561849	140561586	140561701	140561843	140561849	5870	3,4,11	3,4,2	1,9,4	0,0,0	291	149	1.11308e-08	8.5084e-06	0.339,0.339,0.738	1.0,1.0,1.0	-0.528
802	"ENSG00000187994"	"RINL"	chr19	-	38871077	38871870	38871077	38871227	38871797	38871870	802	0,2,0	2,3,4	2,1,1	0,0,2	298	149	0.00095708	0.0457245	0.0,0.25,0.0	1.0,1.0,0.2	-0.65
3146	"ENSG00000114859"	"CLCN2"	chr3	-	184355693	184357094	184355693	184355844	184356992	184357094	3146	1,0,0	0,2,2	5,1,1	0,0,0	298	149	5.57824e-08	3.04572e-05	1.0,0.0,0.0	1.0,1.0,1.0	-0.667
4021	"ENSG00000100416"	"TRMU"	chr22	+	46355443	46357337	46355443	46355588	46356841	46357337	4021	0,4,2	10,1,5	6,7,2	0,0,0	298	149	1.89804e-12	7.2543e-09	0.0,0.667,0.167	1.0,1.0,1.0	-0.722
6024	"ENSG00000149823"	"VPS51"	chr11	+	65107186	65107727	65107186	65107372	65107580	65107727	6024	6,0,2	10,2,1	5,2,8	0,0,0	298	149	8.15159e-12	1.55777e-08	0.231,0.0,0.5	1.0,1.0,1.0	-0.756
7006	"ENSG00000156500"	"FAM122C"	chrX	+	134807190	134807708	134807190	134807341	134807539	134807708	7006	0,7,5	1,5,7	1,5,7	0,0,0	298	149	1.89666e-11	2.41635e-08	0.0,0.412,0.263	1.0,1.0,1.0	-0.775

## Sheet: A5SS
ID	GeneID	geneSymbol	chr	strand	longExonStart_0base	longExonEnd	shortES	shortEE	flankingES	flankingEE	ID	IJC_SAMPLE_1	SJC_SAMPLE_1	IJC_SAMPLE_2	SJC_SAMPLE_2	IncFormLen	SkipFormLen	PValue	FDR	IncLevel1	IncLevel2	IncLevelDifference
7427	"ENSG00000156345"	"CDK20"	chr9	-	87970567	87970897	87970775	87970897	87969795	87969919	7427	2,2,9	0,0,2	0,0,0	4,2,3	298	149	1.13498e-12	1.83753e-09	1.0,1.0,0.692	0.0,0.0,0.0	0.897
633	"ENSG00000012048"	"BRCA1"	chr17	-	43125270	43125370	43125276	43125370	43124016	43124115	633	4,1,1	0,0,0	0,2,0	6,0,3	155	149	1.05087e-07	5.67117e-05	1.0,1.0,1.0	0.0,1.0,0.0	0.667
1422	"ENSG00000005810"	"MYCBP2"	chr13	-	77076750	77076849	77076759	77076849	77070630	77070711	1422	2,2,4	0,0,2	0,2,2	3,5,1	158	149	4.45472e-05	0.00627147	1.0,1.0,0.654	0.0,0.274,0.654	0.575
1198	"ENSG00000133313"	"CNDP2"	chr18	+	74497508	74497726	74497508	74497595	74499936	74500033	1198	4,3,2	0,3,2	0,0,2	1,3,2	280	149	0.000542852	0.0297925	1.0,0.347,0.347	0.0,0.0,0.347	0.449
3307	"ENSG00000268916"	"CSAG3"	chrX	+	152759217	152759684	152759217	152759633	152759842	152760219	3307	67,85,84	0,0,0	80,72,80	22,52,54	200	149	0	0	1.0,1.0,1.0	0.73,0.508,0.525	0.412
7102	"ENSG00000068745"	"IP6K2"	chr3	-	48715314	48715527	48715388	48715527	48695089	48695418	7102	12,21,15	2,1,2	9,8,2	2,9,5	223	149	0.00040081	0.0241649	0.8,0.933,0.834	0.75,0.373,0.211	0.411
2673	"ENSG00000154358"	"OBSCN"	chr1	+	228356150	228356344	228356150	228356193	228359596	228361250	2673	0,10,3	1,0,2	0,0,1	3,1,2	298	149	0.000160141	0.0140145	0.0,1.0,0.429	0.0,0.0,0.2	0.41
757	"ENSG00000132376"	"INPP5K"	chr17	-	1515426	1515585	1515568	1515585	1513871	1513979	757	2,6,4	0,0,2	2,0,1	0,6,1	291	149	0.000115343	0.0116712	1.0,1.0,0.506	1.0,0.0,0.339	0.389
5814	"ENSG00000206573"	"THUMPD3-AS1"	chr3	-	9391426	9391826	9391678	9391826	9388873	9390497	5814	5,1,5	1,3,0	3,1,0	1,5,5	298	149	0.00783506	0.156682	0.714,0.143,1.0	0.6,0.091,0.0	0.389
1681	"ENSG00000167548"	"KMT2D"	chr12	-	49044190	49044304	49044199	49044304	49043867	49043998	1681	3,7,17	0,11,4	2,5,13	4,17,11	158	149	0.0342933	0.411752	1.0,0.375,0.8	0.32,0.217,0.527	0.37
3884	"ENSG00000144747"	"TMF1"	chr3	-	69047348	69048562	69047357	69048562	69044491	69044595	3884	2,3,0	0,0,2	1,1,0	1,1,1	158	149	0.00186006	0.0647621	1.0,1.0,0.0	0.485,0.485,0.0	0.343
890	"ENSG00000229809"	"ZNF688"	chr16	-	30571433	30572734	30572121	30572734	30571009	30571123	890	23,19,18	0,0,0	19,15,19	7,2,4	298	149	2.20817e-08	1.43001e-05	1.0,1.0,1.0	0.576,0.789,0.704	0.31
466	"ENSG00000167757"	"KLK11"	chr19	-	51024633	51024794	51024637	51024794	51024044	51024310	466	2,4,2	4,5,2	2,0,0	3,1,5	153	149	0.00158148	0.0595446	0.327,0.438,0.493	0.394,0.0,0.0	0.288
1969	"ENSG00000150433"	"TMEM218"	chr11	-	125102636	125102809	125102733	125102809	125102131	125102351	1969	1,21,11	0,0,0	12,7,7	2,2,2	246	149	0.000195015	0.0150348	1.0,1.0,1.0	0.784,0.679,0.679	0.286
3059	"ENSG00000168028"	"RPSA"	chr3	+	39408605	39408739	39408605	39408724	39411648	39411777	3059	0,2,3	8,0,0	0,2,1	4,9,0	164	149	0.00601902	0.138224	0.0,1.0,1.0	0.0,0.168,1.0	0.277
3091	"ENSG00000104957"	"CCDC130"	chr19	+	13731759	13731950	13731759	13731931	13732174	13732285	3091	16,22,23	2,0,0	13,18,11	2,8,8	168	149	7.36796e-07	0.000272536	0.876,1.0,1.0	0.852,0.666,0.549	0.27
6070	"ENSG00000164620"	"RELL2"	chr5	+	141636949	141638409	141636949	141637741	141638794	141638860	6070	58,49,38	10,6,0	59,34,23	16,16,7	298	149	0.00106811	0.0455071	0.744,0.803,1.0	0.648,0.515,0.622	0.254
329	"ENSG00000101194"	"SLC17A9"	chr20	+	62962623	62962754	62962623	62962734	62963272	62963369	329	21,14,9	0,0,3	15,3,14	4,7,1	169	149	0.00238657	0.0760362	1.0,1.0,0.726	0.768,0.274,0.925	0.253
3272	"ENSG00000071462"	"BUD23"	chr7	+	73683766	73684000	73683766	73683901	73686635	73686731	3272	9,21,30	6,16,22	5,5,12	12,27,16	248	149	0.000292302	0.0185583	0.474,0.441,0.45	0.2,0.1,0.311	0.251
5855	"ENSG00000115760"	"BIRC6"	chr2	+	32453807	32453954	32453807	32453942	32463193	32463381	5855	3,1,2	2,3,4	0,2,0	6,3,2	161	149	0.00405987	0.104284	0.581,0.236,0.316	0.0,0.382,0.0	0.25
836	"ENSG00000067955"	"CBFB"	chr16	+	67082212	67082339	67082212	67082308	67098709	67101058	836	29,39,50	11,15,28	18,2,34	11,15,24	180	149	0.0358449	0.414015	0.686,0.683,0.596	0.575,0.099,0.54	0.25
5614	"ENSG00000116001"	"TIA1"	chr2	-	70216752	70216994	70216885	70216994	70216403	70216499	5614	4,0,2	4,6,1	1,0,0	4,4,2	282	149	0.00589542	0.136353	0.346,0.0,0.514	0.117,0.0,0.0	0.248
4578	"ENSG00000180198"	"RCC1"	chr1	+	28508829	28508905	28508829	28508901	28529857	28529939	4578	9,4,2	0,0,4	1,0,9	0,6,5	153	149	0.0385159	0.424018	1.0,1.0,0.327	1.0,0.0,0.637	0.23
3793	"ENSG00000092148"	"HECTD1"	chr14	-	31122913	31123047	31122919	31123047	31121382	31121505	3793	16,7,12	0,1,0	12,22,1	5,0,1	155	149	0.0180184	0.273015	1.0,0.871,1.0	0.698,1.0,0.49	0.228
3148	"ENSG00000058673"	"ZC3H11A"	chr1	+	203796292	203796601	203796292	203796496	203801574	203801628	3148	4,2,3	2,10,4	0,2,0	8,3,3	254	149	0.00128533	0.0520239	0.54,0.105,0.306	0.0,0.281,0.0	0.223
3880	"ENSG00000162585"	"FAAP20"	chr1	-	2198753	2201225	2201049	2201225	2198006	2198142	3880	1,2,1	0,0,1	2,4,2	4,2,0	298	149	0.000593863	0.031015	1.0,1.0,0.333	0.2,0.5,1.0	0.211
912	"ENSG00000168488"	"ATXN2L"	chr16	+	28835932	28836176	28835932	28836122	28836325	28836490	912	15,14,12	3,1,6	13,9,10	7,5,7	203	149	0.0405379	0.433208	0.786,0.911,0.595	0.577,0.569,0.512	0.211
3111	"ENSG00000177542"	"SLC25A22"	chr11	-	794452	794513	794469	794513	793528	793619	3111	21,13,18	0,1,5	28,11,17	7,6,8	166	149	0.00451507	0.111602	1.0,0.921,0.764	0.782,0.622,0.656	0.208
4509	"ENSG00000154134"	"ROBO3"	chr11	+	124877518	124878131	124877518	124877752	124878297	124878436	4509	2,6,9	10,9,7	2,4,0	14,14,12	298	149	0.00319436	0.0891666	0.091,0.25,0.391	0.067,0.125,0.0	0.18
4855	"ENSG00000284770"	"TBCE"	chr1	+	235367412	235367552	235367412	235367504	235380018	235380149	4855	2,8,6	10,17,19	0,1,0	13,15,16	197	149	1.36994e-06	0.000443585	0.131,0.262,0.193	0.0,0.048,0.0	0.179
2390	"ENSG00000165699"	"TSC1"	chr9	-	132925586	132927304	132927200	132927304	132923347	132923492	2390	4,12,6	0,0,0	20,8,11	1,0,4	298	149	0.0179314	0.273015	1.0,1.0,1.0	0.909,1.0,0.579	0.171
985	"ENSG00000239382"	"ALKBH6"	chr19	-	36013000	36013089	36013020	36013089	36010893	36011045	985	1,4,2	10,5,9	0,3,0	6,15,8	169	149	0.0124738	0.213704	0.081,0.414,0.164	0.0,0.15,0.0	0.17
743	"ENSG00000183018"	"SPNS2"	chr17	+	4536075	4536426	4536075	4536174	4536899	4536946	743	7,13,35	0,0,0	30,14,19	6,0,2	298	149	5.7707e-05	0.00719212	1.0,1.0,1.0	0.714,1.0,0.826	0.153
532	"ENSG00000181038"	"METTL23"	chr17	+	76726829	76727213	76726829	76726879	76729689	76729794	532	20,47,42	2,3,3	15,32,22	2,10,4	298	149	0.00944521	0.177812	0.833,0.887,0.875	0.789,0.615,0.733	0.153
4011	"ENSG00000110717"	"NDUFS8"	chr11	+	68030742	68030961	68030742	68030877	68032151	68032209	4011	57,18,29	31,9,11	52,22,19	37,26,15	233	149	0.0283231	0.36393	0.54,0.561,0.628	0.473,0.351,0.448	0.152
3842	"ENSG00000138674"	"SEC31A"	chr4	-	82842139	82842481	82842184	82842481	82828999	82829058	3842	49,49,43	3,6,10	18,39,34	5,10,16	194	149	0.00686413	0.146538	0.926,0.862,0.768	0.734,0.75,0.62	0.151
2866	"ENSG00000115694"	"STK25"	chr2	-	241508442	241508584	241508504	241508584	241508005	241508135	2866	19,46,51	3,11,12	35,27,33	18,15,9	211	149	0.0257722	0.342817	0.817,0.747,0.75	0.579,0.56,0.721	0.151
1070	"ENSG00000133422"	"MORC2"	chr22	-	30928018	30928207	30928027	30928207	30926610	30926871	1070	15,30,24	4,3,6	11,29,26	9,10,8	158	149	0.0368937	0.416243	0.78,0.904,0.79	0.535,0.732,0.754	0.151
576	"ENSG00000108506"	"INTS2"	chr17	-	61927653	61927982	61927921	61927982	61926351	61926662	576	4,1,5	1,0,0	10,9,4	4,0,1	298	149	0.00723989	0.149317	0.667,1.0,1.0	0.556,1.0,0.667	0.148
5074	"ENSG00000143207"	"COP1"	chr1	-	176163814	176163891	176163826	176163891	176162868	176162988	5074	16,9,16	0,0,4	10,18,15	3,4,3	161	149	0.0398201	0.432676	1.0,1.0,0.787	0.755,0.806,0.822	0.135
510	"ENSG00000185504"	"FAAP100"	chr17	-	81551731	81552052	81551927	81552052	81550247	81551203	510	59,35,51	21,11,15	53,49,30	29,23,19	298	149	0.0278717	0.362444	0.584,0.614,0.63	0.477,0.516,0.441	0.131
5882	"ENSG00000172262"	"ZNF131"	chr5	+	43161248	43161613	43161248	43161606	43161708	43161931	5882	4,0,2	6,5,0	0,0,1	5,3,0	156	149	0.0353819	0.411752	0.389,0.0,1.0	0.0,0.0,1.0	0.13
1918	"ENSG00000278558"	"TMEM191B"	chr22	+	18529935	18530196	18529935	18530008	18530254	18530573	1918	11,31,26	0,0,3	21,17,28	7,1,1	298	149	0.00934792	0.177009	1.0,1.0,0.813	0.6,0.895,0.933	0.128
6299	"ENSG00000204310"	"AGPAT1"	chr6	-	32171249	32171505	32171296	32171505	32170424	32170600	6299	2,4,4	1,0,0	3,6,9	8,0,0	196	149	0.0336966	0.408566	0.603,1.0,1.0	0.222,1.0,1.0	0.127
2856	"ENSG00000114626"	"ABTB1"	chr3	+	127674390	127674453	127674390	127674418	127675969	127676114	2856	25,29,77	0,2,3	28,43,51	3,7,11	184	149	0.000183943	0.0149897	1.0,0.922,0.954	0.883,0.833,0.79	0.123
636	"ENSG00000131480"	"AOC2"	chr17	+	42849085	42849371	42849085	42849290	42849600	42849730	636	10,14,14	0,2,0	10,10,13	0,1,6	230	149	0.00179401	0.0631414	1.0,0.819,1.0	1.0,0.866,0.584	0.123
1089	"ENSG00000140332"	"TLE3"	chr15	-	70074502	70074607	70074532	70074607	70066013	70066218	1089	3,10,4	10,28,27	1,3,8	35,35,70	179	149	0.00721475	0.149317	0.2,0.229,0.11	0.023,0.067,0.087	0.121
955	"ENSG00000008517"	"IL32"	chr16	+	3065630	3065687	3065630	3065655	3065783	3065826	955	38,12,9	0,0,0	70,13,19	9,3,0	181	149	5.77502e-05	0.00719212	1.0,1.0,1.0	0.865,0.781,1.0	0.118
2924	"ENSG00000166747"	"AP1G1"	chr16	-	71808504	71808832	71808762	71808832	71789278	71789482	2924	4,8,2	18,12,8	3,0,0	12,12,10	298	149	0.000936598	0.0426101	0.1,0.25,0.111	0.111,0.0,0.0	0.117
1874	"ENSG00000225484"	"NUTM2B-AS1"	chr10	-	79808758	79808832	79808762	79808832	79806038	79806122	1874	6,34,33	0,0,1	26,26,25	0,11,2	153	149	8.81855e-05	0.010198	1.0,1.0,0.97	1.0,0.697,0.924	0.116
1519	"ENSG00000110987"	"BCL7A"	chr12	+	122054804	122054989	122054804	122054926	122059091	122062044	1519	0,5,7	8,14,16	0,0,3	3,11,20	212	149	0.00402839	0.104284	0.0,0.201,0.235	0.0,0.0,0.095	0.114
4707	"ENSG00000078269"	"SYNJ2"	chr6	+	158059256	158059537	158059256	158059353	158061991	158062164	4707	1,5,0	7,5,6	0,1,0	7,8,18	298	149	0.0133498	0.226317	0.067,0.333,0.0	0.0,0.059,0.0	0.114
5202	"ENSG00000172831"	"CES2"	chr16	+	66942647	66942785	66942647	66942737	66943298	66943371	5202	41,77,56	11,19,13	35,40,40	19,17,13	197	149	0.0360023	0.414015	0.738,0.754,0.765	0.582,0.64,0.699	0.112
5207	"ENSG00000079277"	"MKNK1"	chr1	-	46604184	46604294	46604226	46604294	46594112	46594280	5207	14,9,27	0,0,0	9,18,14	0,7,0	191	149	0.00258307	0.0760362	1.0,1.0,1.0	1.0,0.667,1.0	0.111
1372	"ENSG00000165801"	"ARHGEF40"	chr14	+	21075331	21075765	21075331	21075499	21076359	21076456	1372	14,28,33	1,0,0	19,23,14	0,2,3	298	149	0.0300718	0.375628	0.875,1.0,1.0	1.0,0.852,0.7	0.108
5487	"ENSG00000121578"	"B4GALT4"	chr3	-	119218649	119218772	119218711	119218772	119216239	119216344	5487	11,25,23	0,0,1	16,17,20	0,4,2	211	149	0.00693544	0.146538	1.0,1.0,0.942	1.0,0.75,0.876	0.105
2872	"ENSG00000182518"	"FAM104B"	chrX	-	55159125	55159228	55159128	55159228	55146180	55146311	2872	13,11,17	183,45,34	12,9,7	114,80,79	152	149	0.0469137	0.477694	0.065,0.193,0.329	0.094,0.099,0.08	0.105
2068	"ENSG00000180773"	"SLC36A4"	chr11	-	93182805	93182894	93182834	93182894	93181690	93181786	2068	10,14,11	2,3,0	12,3,4	1,0,0	178	149	0.0304814	0.375628	0.807,0.796,1.0	0.909,1.0,1.0	-0.102
4571	"ENSG00000170852"	"KBTBD2"	chr7	-	32879434	32879942	32879700	32879942	32874991	32875157	4571	24,31,36	5,1,6	34,33,18	0,2,2	298	149	0.0173403	0.267371	0.706,0.939,0.75	1.0,0.892,0.818	-0.105
7050	"ENSG00000182872"	"RBM10"	chrX	+	47179879	47180040	47179879	47180037	47180211	47180309	7050	40,50,49	42,100,93	75,61,67	62,67,78	152	149	0.0209979	0.305565	0.483,0.329,0.341	0.543,0.472,0.457	-0.106
6524	"ENSG00000135597"	"REPS1"	chr6	-	138926400	138930098	138929976	138930098	138921036	138921124	6524	38,37,39	1,7,6	38,35,45	2,1,2	298	149	0.0170012	0.265175	0.95,0.725,0.765	0.905,0.946,0.918	-0.11
3482	"ENSG00000108094"	"CUL2"	chr10	-	35090178	35090642	35090429	35090642	35071198	35071339	3482	3,0,2	9,9,2	8,12,0	15,4,2	298	149	0.0461129	0.474011	0.143,0.0,0.333	0.211,0.6,0.0	-0.112
6984	"ENSG00000125107"	"CNOT1"	chr16	-	58536967	58537220	58536988	58537220	58534146	58534395	6984	2,5,7	40,72,46	10,7,17	59,44,34	170	149	0.00244908	0.0760362	0.042,0.057,0.118	0.129,0.122,0.305	-0.113
6587	"ENSG00000198561"	"CTNND1"	chr11	+	57761796	57762119	57761796	57762046	57794009	57794081	6587	16,15,12	67,84,65	18,23,47	59,54,71	222	149	0.000290021	0.0185583	0.138,0.107,0.11	0.17,0.222,0.308	-0.115
465	"ENSG00000141994"	"DUS3L"	chr19	-	5786748	5787171	5787060	5787171	5786466	5786542	465	137,70,99	14,8,16	161,77,69	13,3,1	298	149	0.00449157	0.111602	0.83,0.814,0.756	0.861,0.928,0.972	-0.12
2760	"ENSG00000114346"	"ECT2"	chr3	+	172764277	172764500	172764277	172764413	172769006	172769143	2760	70,32,12	5,0,3	74,60,31	1,0,0	236	149	0.00253991	0.0760362	0.898,1.0,0.716	0.979,1.0,1.0	-0.122
5453	"ENSG00000133678"	"TMEM254"	chr10	+	80082144	80082217	80082144	80082204	80086230	80086441	5453	0,0,0	8,9,12	0,5,0	4,8,4	162	149	0.0380877	0.420914	0.0,0.0,0.0	0.0,0.365,0.0	-0.122
2524	"ENSG00000142731"	"PLK4"	chr4	+	127885707	127886728	127885707	127886626	127887395	127887496	2524	14,6,1	5,0,0	11,10,4	0,0,0	251	149	0.0191879	0.286458	0.624,1.0,1.0	1.0,1.0,1.0	-0.125
2224	"ENSG00000068137"	"PLEKHH3"	chr17	-	42669917	42670376	42669942	42670376	42669429	42669621	2224	23,61,118	11,35,27	48,73,76	11,15,14	174	149	0.0180436	0.273015	0.642,0.599,0.789	0.789,0.806,0.823	-0.129
3123	"ENSG00000005001"	"PRSS22"	chr16	-	2856081	2856253	2856133	2856253	2853864	2854022	3123	14,33,33	2,13,4	14,40,53	0,5,5	201	149	0.0348921	0.411752	0.838,0.653,0.859	1.0,0.856,0.887	-0.131
1950	"ENSG00000007255"	"TRAPPC6A"	chr19	-	45178092	45178237	45178134	45178237	45165126	45165194	1950	70,70,71	87,107,108	90,80,49	102,37,49	191	149	0.0152664	0.250926	0.386,0.338,0.339	0.408,0.628,0.438	-0.137
3215	"ENSG00000144591"	"GMPPA"	chr2	+	219498900	219499254	219498900	219498938	219499960	219500015	3215	67,82,71	104,81,87	105,114,88	106,46,63	298	149	0.00577596	0.135399	0.244,0.336,0.29	0.331,0.553,0.411	-0.142
6851	"ENSG00000121716"	"PILRB"	chr7	+	100356749	100356938	100356749	100356883	100358219	100358366	6851	0,1,0	7,25,33	4,8,1	14,17,24	204	149	1.45456e-05	0.00261659	0.0,0.028,0.0	0.173,0.256,0.03	-0.144
6559	"ENSG00000112031"	"MTRF1L"	chr6	-	152995135	152995319	152995243	152995319	152994512	152994676	6559	34,32,15	1,0,9	11,38,19	0,1,1	257	149	0.00618426	0.13906	0.952,1.0,0.491	1.0,0.957,0.917	-0.144
3314	"ENSG00000166526"	"ZNF3"	chr7	-	100077228	100077433	100077302	100077433	100075541	100075630	3314	0,0,0	3,6,6	1,2,5	6,10,12	223	149	0.000278978	0.0185583	0.0,0.0,0.0	0.1,0.118,0.218	-0.145
2423	"ENSG00000136944"	"LMX1B"	chr9	+	126695838	126696003	126695838	126695982	126696293	126701032	2423	0,2,5	19,25,38	6,8,6	25,24,20	170	149	0.00209989	0.0708276	0.0,0.066,0.103	0.174,0.226,0.208	-0.146
2403	"ENSG00000136811"	"ODF2"	chr9	+	128460941	128461067	128460941	128461010	128471307	128471468	2403	14,25,27	4,4,4	24,32,43	4,0,0	206	149	0.00175143	0.0623201	0.717,0.819,0.83	0.813,1.0,1.0	-0.149
1489	"ENSG00000140474"	"ULK3"	chr15	-	74842534	74842676	74842538	74842676	74842279	74842420	1489	5,24,10	1,0,9	14,5,8	0,0,2	153	149	0.00365493	0.0978072	0.83,1.0,0.52	1.0,1.0,0.796	-0.149
7175	"ENSG00000268902"	"CSAG2"	chrX	-	152708798	152709265	152708849	152709265	152708263	152708640	7175	37,22,31	57,47,55	34,21,31	55,15,19	200	149	0.0242291	0.325534	0.326,0.259,0.296	0.315,0.511,0.549	-0.165
7228	"ENSG00000050327"	"ARHGEF5"	chr7	+	144362657	144365823	144362657	144362853	144366354	144366412	7228	9,9,24	2,5,5	6,5,72	1,1,3	298	149	0.00331869	0.0910671	0.692,0.474,0.706	0.75,0.714,0.923	-0.172
1054	"ENSG00000169609"	"C15orf40"	chr15	-	82991931	82992046	82991955	82992046	82988440	82988828	1054	6,11,11	3,0,2	6,12,15	0,0,0	173	149	0.0212069	0.305945	0.633,1.0,0.826	1.0,1.0,1.0	-0.18
2487	"ENSG00000165233"	"CARD19"	chr9	+	93107673	93107827	93107673	93107816	93108990	93109092	2487	17,12,21	5,14,6	33,16,19	7,6,0	160	149	0.0412383	0.437802	0.76,0.444,0.765	0.814,0.713,1.0	-0.186
3728	"ENSG00000272752"	"STAG3L5P-PVRIG2P-PILRB"	chr7	+	100353372	100354012	100353372	100353483	100355142	100355240	3728	13,12,26	1,7,0	13,13,18	0,0,1	298	149	0.00108761	0.0457362	0.867,0.462,1.0	1.0,1.0,0.9	-0.19
4396	"ENSG00000008128"	"CDK11A"	chr1	-	1709478	1709640	1709517	1709640	1709037	1709133	4396	0,0,0	74,2,7	0,17,0	13,10,10	188	149	0.00170363	0.0623201	0.0,0.0,0.0	0.0,0.574,0.0	-0.191
5777	"ENSG00000066322"	"ELOVL1"	chr1	-	43364614	43364647	43364618	43364647	43364323	43364460	5777	6,15,25	4,4,12	15,23,22	2,0,7	153	149	0.0136808	0.229526	0.594,0.785,0.67	0.88,1.0,0.754	-0.195
4388	"ENSG00000214719"	"AC005562"	chr17	+	30631754	30631979	30631754	30631927	30633097	30633390	4388	11,12,12	1,6,1	1,1,9	0,0,0	201	149	3.06397e-05	0.00496056	0.891,0.597,0.899	1.0,1.0,1.0	-0.204
6009	"ENSG00000129083"	"COPB1"	chr11	-	14499706	14499811	14499741	14499811	14498837	14498985	6009	19,28,24	13,8,5	33,21,26	1,1,4	184	149	0.000215277	0.0151536	0.542,0.739,0.795	0.964,0.944,0.84	-0.224
3	"ENSG00000197381"	"ADARB1"	chr21	+	45222017	45223577	45222017	45222107	45225546	45226560	3	2,5,20	0,5,2	2,5,11	0,0,1	298	149	0.000515154	0.0292644	1.0,0.333,0.833	1.0,1.0,0.846	-0.227
5690	"ENSG00000150455"	"TIRAP"	chr11	+	126289664	126289833	126289664	126289817	126290461	126290585	5690	1,0,4	2,3,0	0,3,3	1,0,0	165	149	0.00388355	0.101411	0.311,0.0,1.0	0.0,1.0,1.0	-0.23
6069	"ENSG00000135473"	"PAN2"	chr12	-	56324036	56324182	56324048	56324182	56323806	56323913	6069	0,3,0	2,13,11	3,9,0	7,6,8	161	149	0.00608495	0.138754	0.0,0.176,0.0	0.284,0.581,0.0	-0.23
5807	"ENSG00000188002"	"AC026412"	chr5	-	1632643	1632906	1632844	1632906	1602690	1602735	5807	5,13,11	1,0,4	6,2,11	0,0,0	298	149	0.00870678	0.167813	0.714,1.0,0.579	1.0,1.0,1.0	-0.236
7465	"ENSG00000276291"	"FRG1HP"	chr9	+	40992260	40992775	40992260	40992479	40993252	40993434	7465	5,17,24	4,2,3	15,18,9	0,3,0	298	149	0.00869467	0.167813	0.385,0.81,0.8	1.0,0.75,1.0	-0.252
7361	"ENSG00000249859"	"PVT1"	chr8	+	128070159	128070361	128070159	128070272	128096520	128096654	7361	62,37,26	23,12,16	81,62,43	9,0,11	238	149	0.000110354	0.0115267	0.628,0.659,0.504	0.849,1.0,0.71	-0.256
1789	"ENSG00000104960"	"PTOV1"	chr19	+	49850734	49851096	49850734	49850955	49854405	49854543	1789	9,7,2	2,0,2	10,8,4	0,1,0	290	149	0.0399543	0.432683	0.698,1.0,0.339	1.0,0.804,1.0	-0.256
1926	"ENSG00000148498"	"PARD3"	chr10	-	34337274	34337426	34337277	34337426	34336198	34336243	1926	7,18,17	8,4,5	22,24,17	1,2,1	152	149	0.000189801	0.0149897	0.462,0.815,0.769	0.956,0.922,0.943	-0.258
2576	"ENSG00000116698"	"SMG7"	chr1	+	183542075	183542502	183542075	183542364	183544352	183544497	2576	4,14,17	39,25,22	30,25,32	11,20,29	287	149	0.000185503	0.0149897	0.051,0.225,0.286	0.586,0.394,0.364	-0.261
3278	"ENSG00000105223"	"PLD3"	chr19	+	40348699	40348768	40348699	40348724	40365661	40365930	3278	7,12,78	11,6,1	33,41,35	2,3,3	193	149	0.0290812	0.369481	0.329,0.607,0.984	0.927,0.913,0.9	-0.273
5373	"ENSG00000143702"	"CEP170"	chr1	-	243142285	243142463	243142366	243142463	243139936	243140107	5373	8,7,1	6,2,0	3,7,1	0,0,0	230	149	9.58518e-06	0.00206912	0.463,0.694,1.0	1.0,1.0,1.0	-0.281
2868	"ENSG00000138496"	"PARP9"	chr3	-	122558328	122558467	122558433	122558467	122555285	122556121	2868	1,0,0	1,6,3	1,3,2	4,13,0	254	149	0.0233758	0.319371	0.37,0.0,0.0	0.128,0.119,1.0	-0.292
6170	"ENSG00000108852"	"MPP2"	chr17	-	43898243	43898380	43898279	43898380	43883202	43883355	6170	4,3,2	1,4,1	11,11,16	3,1,0	185	149	0.0164602	0.262071	0.763,0.377,0.617	0.747,0.899,1.0	-0.296
7136	"ENSG00000080561"	"MID2"	chrX	+	107917505	107917739	107917505	107917649	107924342	107924504	7136	0,0,0	1,8,11	1,6,1	4,2,4	239	149	0.00013261	0.0122683	0.0,0.0,0.0	0.135,0.652,0.135	-0.307
4819	"ENSG00000115459"	"ELMOD3"	chr2	+	85371085	85371562	85371085	85371209	85377343	85377474	4819	2,13,27	1,0,10	5,11,18	0,0,0	298	149	4.39694e-05	0.00627147	0.5,1.0,0.574	1.0,1.0,1.0	-0.309
4528	"ENSG00000163138"	"PACRGL"	chr4	+	20700458	20700706	20700458	20700617	20704465	20704533	4528	1,5,5	0,4,2	8,4,2	0,0,0	238	149	0.00012952	0.0122683	1.0,0.439,0.61	1.0,1.0,1.0	-0.317
1325	"ENSG00000100968"	"NFATC4"	chr14	+	24376293	24376878	24376293	24376554	24377637	24377705	1325	6,7,2	7,0,2	13,1,3	0,0,1	298	149	9.40475e-05	0.0105009	0.3,1.0,0.333	1.0,1.0,0.6	-0.322
6876	"ENSG00000177683"	"THAP5"	chr7	-	108565829	108566022	108565951	108566022	108564992	108565105	6876	1,4,6	3,1,1	5,5,1	0,2,0	271	149	0.000861107	0.0398323	0.155,0.687,0.767	1.0,0.579,1.0	-0.323
5308	"ENSG00000163714"	"U2SURP"	chr3	+	143021349	143021385	143021349	143021382	143021472	143021555	5308	4,5,4	16,9,9	23,6,12	18,8,2	152	149	0.00409019	0.104284	0.197,0.353,0.303	0.556,0.424,0.855	-0.327
3930	"ENSG00000086730"	"LAT2"	chr7	+	74214821	74215010	74214821	74214940	74215946	74216069	3930	2,17,8	3,0,5	13,22,36	0,0,5	219	149	0.03796	0.420914	0.312,1.0,0.521	1.0,1.0,0.83	-0.332
2665	"ENSG00000237765"	"FAM200B"	chr4	+	15681755	15681968	15681755	15681784	15686235	15686462	2665	0,2,3	5,0,0	3,11,9	0,0,0	298	149	0.0206661	0.304167	0.0,1.0,1.0	1.0,1.0,1.0	-0.333
3735	"ENSG00000169758"	"TMEM266"	chr15	+	76156603	76156758	76156603	76156652	76160094	76160168	3735	0,0,2	2,3,3	4,0,2	5,1,0	255	149	0.0403522	0.433208	0.0,0.0,0.28	0.319,0.0,1.0	-0.346
3658	"ENSG00000062524"	"LTK"	chr15	-	41507513	41507657	41507561	41507657	41507094	41507290	3658	0,6,15	4,8,33	7,12,13	8,1,14	197	149	0.0259389	0.342817	0.0,0.362,0.256	0.398,0.901,0.413	-0.365
6872	"ENSG00000144120"	"TMEM177"	chr2	+	119679166	119679617	119679166	119679225	119680831	119682118	6872	7,8,5	20,6,21	13,15,16	11,0,13	298	149	0.00649042	0.140962	0.149,0.4,0.106	0.371,1.0,0.381	-0.366
823	"ENSG00000184939"	"ZFP90"	chr16	+	68539290	68539479	68539290	68539469	68539757	68539825	823	4,2,2	7,5,9	3,6,1	0,2,4	159	149	0.0338158	0.408566	0.349,0.273,0.172	1.0,0.738,0.19	-0.378
6550	"ENSG00000169359"	"SLC33A1"	chr3	-	155833467	155834041	155833856	155834041	155829687	155829903	6550	4,3,9	3,2,0	6,7,9	0,0,0	298	149	0.00115055	0.0471582	0.4,0.429,1.0	1.0,1.0,1.0	-0.39
3203	"ENSG00000160179"	"ABCG1"	chr21	+	42287888	42288073	42287888	42288037	42288210	42288312	3203	2,1,5	3,3,6	9,7,5	0,3,4	185	149	0.0098501	0.181219	0.349,0.212,0.402	1.0,0.653,0.502	-0.397
4435	"ENSG00000286061"	"RCAN3AS"	chr1	-	24502347	24502382	24502372	24502382	24499652	24499711	4435	1,2,2	2,2,0	1,2,1	0,0,0	174	149	0.0164358	0.262071	0.3,0.461,1.0	1.0,1.0,1.0	-0.413
2451	"ENSG00000119314"	"PTBP3"	chr9	-	112297831	112297916	112297840	112297916	112275843	112276013	2451	11,1,3	15,11,2	10,2,1	4,1,0	158	149	0.00842537	0.164345	0.409,0.079,0.586	0.702,0.654,1.0	-0.427
1772	"ENSG00000082805"	"ERC1"	chr12	+	1112214	1112307	1112214	1112298	1115865	1116033	1772	0,0,0	10,4,5	0,5,2	4,11,0	158	149	0.00645164	0.140962	0.0,0.0,0.0	0.0,0.3,1.0	-0.433
5251	"ENSG00000221838"	"AP4M1"	chr7	+	100101879	100102393	100101879	100101989	100102674	100102781	5251	5,4,0	0,1,5	2,2,7	0,0,0	298	149	0.000641531	0.0317714	1.0,0.667,0.0	1.0,1.0,1.0	-0.444
4600	"ENSG00000167315"	"ACAA2"	chr18	-	49813681	49813953	49813816	49813953	49802686	49802853	4600	3,13,2	6,5,1	7,10,7	2,0,0	284	149	3.51149e-05	0.00541438	0.208,0.577,0.512	0.647,1.0,1.0	-0.45
6730	"ENSG00000197062"	"ZSCAN26"	chr6	+	28271853	28272339	28271853	28271934	28272669	28272787	6730	1,3,0	3,0,1	1,5,2	0,0,1	298	149	0.00075549	0.0359747	0.143,1.0,0.0	1.0,1.0,0.5	-0.452
5749	"ENSG00000166881"	"NEMP1"	chr12	-	57070673	57070893	57070819	57070893	57064645	57064739	5749	1,5,2	0,4,3	3,2,6	0,0,0	295	149	2.67717e-06	0.00078806	1.0,0.387,0.252	1.0,1.0,1.0	-0.454
3224	"ENSG00000072195"	"SPEG"	chr2	+	219443107	219443637	219443107	219443150	219444652	219444742	3224	2,23,7	9,5,15	11,19,12	0,0,10	298	149	0.00247845	0.0760362	0.1,0.697,0.189	1.0,1.0,0.375	-0.463
311	"ENSG00000185761"	"ADAMTSL5"	chr19	-	1511035	1511136	1511075	1511136	1510844	1510917	311	0,6,0	2,7,12	7,3,8	4,2,2	189	149	0.000212371	0.0151536	0.0,0.403,0.0	0.58,0.542,0.759	-0.493
3855	"ENSG00000102048"	"ASB9"	chrX	-	15248682	15248935	15248743	15248935	15243986	15244630	3855	6,0,4	1,3,2	4,11,2	0,1,0	210	149	4.80193e-05	0.00647861	0.81,0.0,0.587	1.0,0.886,1.0	-0.496
1495	"ENSG00000186866"	"POFUT2"	chr21	-	45283351	45283527	45283382	45283527	45282368	45282398	1495	0,8,0	2,3,6	1,1,1	2,0,0	180	149	0.00303788	0.0862865	0.0,0.688,0.0	0.293,1.0,1.0	-0.535
6483	"ENSG00000118518"	"RNF146"	chr6	+	127266882	127267095	127266882	127266925	127280230	127280340	6483	0,5,9	1,2,4	3,2,8	0,0,1	298	149	7.54916e-06	0.00174601	0.0,0.556,0.529	1.0,1.0,0.8	-0.572
5357	"ENSG00000128596"	"CCDC136"	chr7	+	128801185	128801509	128801185	128801473	128804649	128804761	5357	1,2,6	1,5,5	5,5,1	0,0,0	185	149	2.1453e-10	2.31549e-07	0.446,0.244,0.491	1.0,1.0,1.0	-0.606
4539	"ENSG00000182134"	"TDRKH"	chr1	-	151790379	151790488	151790398	151790488	151782898	151783049	4539	0,0,1	2,2,4	1,1,1	0,0,3	168	149	0.0191499	0.286458	0.0,0.0,0.181	1.0,1.0,0.228	-0.682
1200	"ENSG00000128242"	"GAL3ST1"	chr22	-	30558259	30558388	30558278	30558388	30557261	30557401	1200	1,1,0	5,1,3	1,1,5	0,0,1	168	149	2.92157e-09	2.36501e-06	0.151,0.47,0.0	1.0,1.0,0.816	-0.732

## Sheet: A3SS
ID	GeneID	geneSymbol	chr	strand	longExonStart_0base	longExonEnd	shortES	shortEE	flankingES	flankingEE	ID	IJC_SAMPLE_1	SJC_SAMPLE_1	IJC_SAMPLE_2	SJC_SAMPLE_2	IncFormLen	SkipFormLen	PValue	FDR	IncLevel1	IncLevel2	IncLevelDifference
7830	"ENSG00000143952"	"VPS54"	chr2	-	63981645	63981887	63981645	63981851	63983863	63984019	7830	4,5,8	0,1,0	2,1,0	3,2,1	185	149	1.45111e-07	7.26136e-05	1.0,0.801,1.0	0.349,0.287,0.0	0.722
4742	"ENSG00000178950"	"GAK"	chr4	-	850935	851974	850935	851084	865121	865244	4742	2,6,10	0,0,0	0,0,6	2,1,0	298	149	0.000537169	0.027008	1.0,1.0,1.0	0.0,0.0,1.0	0.667
6172	"ENSG00000079150"	"FKBP7"	chr2	-	178469651	178469785	178469651	178469782	178477061	178477213	6172	15,4,1	1,0,0	0,0,7	4,1,0	152	149	0.000549128	0.0272063	0.936,1.0,1.0	0.0,0.0,1.0	0.645
5802	"ENSG00000183853"	"KIRREL1"	chr1	+	158089453	158089628	158089501	158089628	158088326	158088454	5802	4,11,8	1,2,3	1,0,2	5,2,6	197	149	4.0803e-07	0.000170148	0.752,0.806,0.669	0.131,0.0,0.201	0.632
76	"ENSG00000198792"	"TMEM184B"	chr22	-	38231243	38231399	38231243	38231334	38247769	38248019	76	3,4,3	2,0,0	0,3,0	1,1,1	214	149	0.00213972	0.0759237	0.511,1.0,1.0	0.0,0.676,0.0	0.612
503	"ENSG00000142303"	"ADAMTS10"	chr19	-	8597233	8597322	8597233	8597317	8600927	8601145	503	4,9,10	2,0,1	3,0,0	1,1,2	154	149	0.000369078	0.0209871	0.659,1.0,0.906	0.744,0.0,0.0	0.607
9050	"ENSG00000185917"	"SETD4"	chr21	-	36058815	36058973	36058815	36058924	36060281	36060313	9050	2,2,3	0,3,0	0,2,3	3,3,5	198	149	0.00143945	0.0567168	1.0,0.334,1.0	0.0,0.334,0.311	0.563
11123	"ENSG00000171680"	"PLEKHG5"	chr1	-	6467824	6467898	6467824	6467893	6469041	6469241	11123	5,6,1	0,0,2	1,0,7	3,1,6	154	149	0.000379787	0.0211161	1.0,1.0,0.326	0.244,0.0,0.53	0.517
2260	"ENSG00000170919"	"TPT1-AS1"	chr13	+	45377111	45377215	45377139	45377215	45369958	45370182	2260	4,2,5	0,0,0	1,3,0	0,3,3	177	149	3.22883e-05	0.00448807	1.0,1.0,1.0	1.0,0.457,0.0	0.514
4734	"ENSG00000134138"	"MEIS2"	chr15	-	36895150	36895261	36895150	36895240	36896627	36896686	4734	3,1,1	0,0,1	1,0,0	0,1,1	170	149	0.00159537	0.0603872	1.0,1.0,0.467	1.0,0.0,0.0	0.489
4060	"ENSG00000138698"	"RAP1GDS1"	chr4	+	98293404	98293515	98293407	98293515	98261485	98261569	4060	1,8,12	2,0,7	0,1,7	8,4,15	152	149	0.00105854	0.0456631	0.329,1.0,0.627	0.0,0.197,0.314	0.482
2019	"ENSG00000130751"	"NPAS1"	chr19	+	47040977	47041125	47041024	47041125	47040443	47040550	2019	9,2,5	6,6,1	0,1,0	6,8,5	196	149	7.53977e-07	0.000263181	0.533,0.202,0.792	0.0,0.087,0.0	0.48
10543	"ENSG00000188690"	"UROS"	chr10	-	125789282	125789528	125789282	125789363	125794879	125794978	10543	11,12,15	8,0,0	6,9,5	6,10,5	298	149	0.000560688	0.0275067	0.407,1.0,1.0	0.333,0.31,0.333	0.477
1988	"ENSG00000119599"	"DCAF4"	chr14	+	72954160	72954262	72954163	72954262	72951797	72951877	1988	3,6,2	1,3,0	1,4,1	7,2,4	152	149	0.00409447	0.112575	0.746,0.662,1.0	0.123,0.662,0.197	0.475
4378	"ENSG00000160298"	"C21orf58"	chr21	-	46317207	46317348	46317207	46317268	46318011	46318220	4378	0,3,2	5,3,0	0,0,0	2,1,1	229	149	0.0154158	0.260771	0.0,0.394,1.0	0.0,0.0,0.0	0.465
9709	"ENSG00000143224"	"PPOX"	chr1	+	161168412	161168576	161168444	161168576	161167994	161168127	9709	7,3,5	0,0,0	4,4,0	2,0,2	181	149	0.0154186	0.260771	1.0,1.0,1.0	0.622,1.0,0.0	0.459
9029	"ENSG00000127564"	"PKMYT1"	chr16	-	2973137	2973445	2973137	2973253	2973999	2974157	9029	6,16,12	0,0,0	21,9,3	5,1,8	298	149	8.36185e-08	5.97753e-05	1.0,1.0,1.0	0.677,0.818,0.158	0.449
2010	"ENSG00000126456"	"IRF3"	chr19	-	49660712	49660844	49660712	49660828	49662424	49662617	2010	5,2,5	2,8,0	3,1,0	4,5,6	165	149	0.00636157	0.150282	0.693,0.184,1.0	0.404,0.153,0.0	0.44
5147	"ENSG00000196290"	"NIF3L1"	chr2	+	200891735	200892379	200891917	200892379	200889368	200889391	5147	1,4,6	0,0,0	5,2,2	3,3,0	298	149	2.8809e-05	0.00448493	1.0,1.0,1.0	0.455,0.25,1.0	0.432
9082	"ENSG00000077254"	"USP33"	chr1	-	77721830	77721925	77721830	77721901	77722023	77722196	9082	9,2,4	5,10,0	0,4,0	2,4,6	173	149	0.0145531	0.253354	0.608,0.147,1.0	0.0,0.463,0.0	0.431
1054	"ENSG00000275410"	"HNF1B"	chr17	-	37733556	37733821	37733556	37733743	37739439	37739639	1054	19,25,17	0,0,0	20,9,12	8,4,8	227	149	2.25108e-11	3.7548e-08	1.0,1.0,1.0	0.621,0.596,0.496	0.429
7719	"ENSG00000145730"	"PAM"	chr5	+	103028181	103028238	103028184	103028238	103019789	103019843	7719	27,39,40	4,19,6	0,14,48	12,12,27	152	149	0.00255614	0.0830579	0.869,0.668,0.867	0.0,0.534,0.635	0.412
8663	"ENSG00000109794"	"FAM149A"	chr4	+	186167180	186167262	186167183	186167262	186166967	186167096	8663	6,12,15	0,1,2	2,7,2	2,5,2	152	149	0.000123538	0.0106583	1.0,0.922,0.88	0.495,0.578,0.495	0.411
4625	"ENSG00000163946"	"TASOR"	chr3	-	56633043	56633966	56633043	56633843	56638705	56638765	4625	21,5,4	0,0,0	5,5,10	4,3,0	272	149	1.81229e-05	0.00335878	1.0,1.0,1.0	0.406,0.477,1.0	0.372
879	"ENSG00000267123"	"SCAT1"	chr17	-	78630031	78630430	78630031	78630280	78631989	78632087	879	6,11,6	0,2,2	6,1,5	6,1,2	298	149	0.0119512	0.224825	1.0,0.733,0.6	0.333,0.333,0.556	0.37
680	"ENSG00000078747"	"ITCH"	chr20	+	34393769	34393881	34393790	34393881	34369393	34369470	680	1,2,4	15,1,2	0,1,1	16,13,4	170	149	0.0010114	0.0440092	0.055,0.637,0.637	0.0,0.063,0.18	0.362
4032	"ENSG00000073331"	"ALPK1"	chr4	+	112377677	112377898	112377729	112377898	112315800	112315852	4032	1,3,2	0,0,0	7,1,1	2,0,3	201	149	0.00261005	0.084121	1.0,1.0,1.0	0.722,1.0,0.198	0.36
8190	"ENSG00000213199"	"ASIC3"	chr7	+	151052553	151052754	151052573	151052754	151052415	151052474	8190	2,9,5	1,11,25	0,1,2	14,13,18	169	149	0.00022056	0.0155448	0.638,0.419,0.15	0.0,0.064,0.089	0.351
10126	"ENSG00000166783"	"MARF1"	chr16	-	15622933	15623126	15622933	15623123	15624768	15624927	10126	10,2,3	7,6,11	0,0,0	12,8,1	152	149	1.00828e-07	6.3068e-05	0.583,0.246,0.211	0.0,0.0,0.0	0.347
5012	"ENSG00000072195"	"SPEG"	chr2	+	219444024	219444059	219444029	219444059	219443107	219443150	5012	9,11,11	0,20,31	7,9,3	25,21,34	154	149	0.0206523	0.3018	1.0,0.347,0.256	0.213,0.293,0.079	0.339
2787	"ENSG00000148803"	"FUOM"	chr10	-	133357186	133357462	133357186	133357255	133357656	133357737	2787	4,6,3	5,0,0	7,7,2	11,1,3	298	149	0.042956	0.466273	0.286,1.0,1.0	0.241,0.778,0.25	0.339
9256	"ENSG00000146067"	"FAM193B"	chr5	-	177531952	177532200	177531952	177532131	177532442	177532641	9256	2,1,2	0,0,0	5,0,4	0,4,0	218	149	0.0398433	0.441276	1.0,1.0,1.0	1.0,0.0,1.0	0.333
5862	"ENSG00000163995"	"ABLIM2"	chr4	-	8008058	8008200	8008058	8008197	8009049	8009102	5862	19,12,9	0,10,3	6,11,17	8,15,20	152	149	0.00160502	0.0603872	1.0,0.541,0.746	0.424,0.418,0.455	0.33
3752	"ENSG00000100335"	"MIEF1"	chr22	+	39509337	39509571	39509421	39509571	39504202	39504534	3752	4,2,1	2,0,0	1,1,4	0,5,3	233	149	0.00138684	0.0555178	0.561,1.0,1.0	1.0,0.113,0.46	0.329
7730	"ENSG00000266028"	"SRGAP2"	chr1	+	206401420	206401645	206401423	206401645	206393544	206393673	7730	3,4,5	2,4,3	0,2,7	13,6,7	152	149	0.0156439	0.262692	0.595,0.495,0.62	0.0,0.246,0.495	0.323
7845	"ENSG00000048991"	"R3HDM1"	chr2	+	135651729	135652032	135651732	135652032	135645378	135645527	7845	15,15,12	8,0,4	5,7,1	3,7,2	152	149	0.03448	0.408796	0.648,1.0,0.746	0.62,0.495,0.329	0.317
7292	"ENSG00000197530"	"MIB2"	chr1	+	1623388	1623482	1623430	1623482	1616507	1616614	7292	20,8,18	4,5,10	3,2,17	7,10,8	191	149	0.0190384	0.293114	0.796,0.555,0.584	0.251,0.135,0.624	0.308
2707	"ENSG00000229212"	"AC044860"	chr15	-	85207467	85207618	85207467	85207605	85208774	85208929	2707	5,2,3	0,0,0	3,5,4	0,3,4	162	149	3.97608e-05	0.00486018	1.0,1.0,1.0	1.0,0.605,0.479	0.305
3150	"ENSG00000090661"	"CERS4"	chr19	+	8251043	8251249	8251075	8251249	8210705	8210862	3150	24,11,45	0,69,116	10,25,28	75,89,118	181	149	0.0349527	0.412507	1.0,0.116,0.242	0.099,0.188,0.163	0.303
4320	"ENSG00000109320"	"NFKB1"	chr4	+	102533844	102533885	102533847	102533885	102529835	102529914	4320	8,8,8	0,0,3	4,9,8	3,7,3	152	149	0.000668811	0.0310758	1.0,1.0,0.723	0.567,0.558,0.723	0.292
7620	"ENSG00000197323"	"TRIM33"	chr1	-	114397607	114397990	114397607	114397860	114399456	114399609	7620	6,3,4	1,1,1	8,1,6	2,4,5	279	149	0.0274563	0.358723	0.762,0.616,0.681	0.681,0.118,0.391	0.29
10729	"ENSG00000130396"	"AFDN"	chr6	+	167962432	167962567	167962438	167962567	167951185	167952187	10729	9,5,12	1,2,5	5,6,10	7,8,6	155	149	0.0116363	0.221999	0.896,0.706,0.698	0.407,0.419,0.616	0.286
464	"ENSG00000133460"	"SLC2A11"	chr22	+	23875084	23875241	23875120	23875241	23868480	23868641	464	16,7,0	0,4,3	1,0,1	1,3,2	185	149	0.000721779	0.0328344	1.0,0.585,0.0	0.446,0.0,0.287	0.284
8021	"ENSG00000131848"	"ZSCAN5A"	chr19	-	56221311	56222326	56221311	56222323	56222590	56222741	8021	4,4,3	0,1,1	4,5,0	0,2,3	152	149	0.0165329	0.270389	1.0,0.797,0.746	1.0,0.71,0.0	0.278
341	"ENSG00000236144"	"TMEM147-AS1"	chr19	-	35542910	35543273	35542910	35543097	35545936	35546029	341	1,3,2	0,0,1	6,3,6	2,3,1	298	149	0.000322022	0.0187372	1.0,1.0,0.5	0.6,0.333,0.75	0.272
4890	"ENSG00000058673"	"ZC3H11A"	chr1	+	203802651	203803016	203802956	203803016	203801574	203801628	4890	4,14,12	0,1,2	6,4,6	4,3,0	298	149	0.0149292	0.256721	1.0,0.875,0.75	0.429,0.4,1.0	0.265
9913	"ENSG00000175048"	"ZDHHC14"	chr6	+	157672723	157673529	157672768	157673529	157653524	157653627	9913	6,29,21	3,21,19	1,10,22	9,18,24	194	149	0.0292528	0.372689	0.606,0.515,0.459	0.079,0.299,0.413	0.263
6869	"ENSG00000163235"	"TGFA"	chr2	-	70465615	70465736	70465615	70465733	70514858	70514912	6869	9,24,27	5,9,3	11,4,16	10,11,7	152	149	0.0149252	0.256721	0.638,0.723,0.898	0.519,0.263,0.691	0.262
8991	"ENSG00000075539"	"FRYL"	chr4	-	48546066	48546271	48546066	48546268	48547583	48547769	8991	3,1,4	0,0,0	4,4,7	3,2,0	152	149	0.00833131	0.17086	1.0,1.0,1.0	0.567,0.662,1.0	0.257
1095	"ENSG00000167549"	"CORO6"	chr17	-	29616937	29618632	29616937	29617042	29618789	29618971	1095	1,3,4	1,1,3	0,2,1	7,1,7	298	149	0.00365693	0.105776	0.333,0.6,0.4	0.0,0.5,0.067	0.255
7514	"ENSG00000125637"	"PSD4"	chr2	+	113197746	113197913	113197749	113197913	113197563	113197634	7514	18,13,10	9,5,9	10,6,2	18,7,4	152	149	0.0100693	0.198374	0.662,0.718,0.521	0.353,0.457,0.329	0.254
5038	"ENSG00000154309"	"DISP1"	chr1	+	222836922	222837384	222837218	222837384	222835118	222835215	5038	28,4,15	1,1,0	5,11,12	3,3,2	298	149	0.000259215	0.0168456	0.933,0.667,1.0	0.455,0.647,0.75	0.249
154	"ENSG00000244486"	"SCARF2"	chr22	-	20429224	20429355	20429224	20429340	20429535	20429653	154	2,4,3	3,6,4	1,0,1	4,5,3	164	149	0.000469701	0.0242307	0.377,0.377,0.405	0.185,0.0,0.232	0.247
6127	"ENSG00000163939"	"PBRM1"	chr3	-	52589069	52589255	52589069	52589252	52603520	52603732	6127	3,6,3	0,0,0	3,6,7	3,0,2	152	149	0.0110086	0.211872	1.0,1.0,1.0	0.495,1.0,0.774	0.244
6317	"ENSG00000141293"	"SKAP1"	chr17	-	48162468	48162569	48162468	48162566	48170608	48170659	6317	22,30,19	2,3,19	7,33,21	11,14,19	152	149	0.0283521	0.365654	0.915,0.907,0.495	0.384,0.698,0.52	0.238
9363	"ENSG00000007384"	"RHBDF1"	chr16	-	58973	59127	58973	59093	59418	59494	9363	1,1,4	0,0,1	2,3,4	1,0,4	183	149	0.00636687	0.150282	1.0,1.0,0.765	0.62,1.0,0.449	0.232
3459	"ENSG00000149150"	"SLC43A1"	chr11	-	57501151	57501374	57501151	57501329	57513957	57514124	3459	4,1,0	2,9,1	0,0,0	10,4,3	194	149	0.0296354	0.372689	0.606,0.079,0.0	0.0,0.0,0.0	0.228
1956	"ENSG00000100722"	"ZC3H14"	chr14	+	88609711	88609803	88609714	88609803	88609266	88609403	1956	35,20,41	18,8,12	19,19,34	27,26,19	152	149	0.0029208	0.0896666	0.656,0.71,0.77	0.408,0.417,0.637	0.225
3707	"ENSG00000185101"	"ANO9"	chr11	-	419581	420615	419581	419729	420717	420860	3707	11,22,19	0,0,0	7,11,14	1,1,3	298	149	0.00735376	0.162107	1.0,1.0,1.0	0.778,0.846,0.7	0.225
8829	"ENSG00000029363"	"BCLAF1"	chr6	-	136277864	136278776	136277864	136278770	136279762	136279876	8829	16,8,13	0,0,0	11,9,6	5,0,3	155	149	3.41857e-05	0.00462338	1.0,1.0,1.0	0.679,1.0,0.658	0.221
9014	"ENSG00000213024"	"NUP62"	chr19	-	49927693	49927848	49927693	49927815	49929349	49929763	9014	7,9,8	0,1,0	10,8,17	6,2,2	182	149	7.55787e-05	0.00787908	1.0,0.88,1.0	0.577,0.766,0.874	0.221
6399	"ENSG00000156531"	"PHF6"	chrX	+	134413487	134413657	134413490	134413657	134393908	134393952	6399	5,1,4	23,4,3	2,2,0	9,18,4	152	149	0.038137	0.435702	0.176,0.197,0.567	0.179,0.098,0.0	0.221
7032	"ENSG00000109046"	"WSB1"	chr17	+	27307743	27309272	27309099	27309272	27306781	27306882	7032	8,4,6	3,8,10	7,4,0	9,19,26	298	149	0.0102237	0.199841	0.571,0.2,0.231	0.28,0.095,0.0	0.209
7651	"ENSG00000163870"	"TPRA1"	chr3	-	127594799	127595140	127594799	127594933	127595451	127595690	7651	4,2,2	1,0,0	10,3,2	2,3,0	298	149	0.00319933	0.0958649	0.667,1.0,1.0	0.714,0.333,1.0	0.207
8348	"ENSG00000164649"	"CDCA7L"	chr7	-	21911616	21911754	21911616	21911751	21916753	21916894	8348	32,31,17	13,1,9	24,34,21	25,30,9	152	149	0.0074698	0.162517	0.707,0.968,0.649	0.485,0.526,0.696	0.206
6794	"ENSG00000115652"	"UXS1"	chr2	-	106164735	106164799	106164735	106164784	106166055	106166083	6794	12,7,21	36,25,17	3,11,5	33,40,46	164	149	0.00400527	0.111346	0.232,0.203,0.529	0.076,0.2,0.09	0.199
3043	"ENSG00000123240"	"OPTN"	chr10	+	13109096	13109288	13109111	13109288	13108961	13109015	3043	2,0,4	1,3,13	0,0,2	1,2,5	164	149	0.034428	0.408796	0.645,0.0,0.218	0.0,0.0,0.267	0.199
10254	"ENSG00000198925"	"ATG9A"	chr2	-	219228433	219228485	219228433	219228482	219229534	219229639	10254	14,24,39	1,2,4	22,14,19	10,7,4	152	149	0.000622288	0.0299416	0.932,0.922,0.905	0.683,0.662,0.823	0.197
6986	"ENSG00000205593"	"DENND6B"	chr22	-	50316024	50316475	50316024	50316087	50317292	50317373	6986	5,15,22	0,0,0	12,10,11	8,0,0	298	149	0.00300676	0.091743	1.0,1.0,1.0	0.429,1.0,1.0	0.19
1886	"ENSG00000275835"	"TUBGCP5"	chr15	-	23027191	23027309	23027191	23027306	23030884	23031020	1886	2,4,1	6,11,17	0,0,0	7,14,11	152	149	0.000581299	0.028241	0.246,0.263,0.055	0.0,0.0,0.0	0.188
5023	"ENSG00000102901"	"CENPT"	chr16	-	67828473	67828605	67828473	67828559	67828666	67828843	5023	3,4,7	0,0,0	10,7,14	3,0,4	195	149	0.000204392	0.0152653	1.0,1.0,1.0	0.718,1.0,0.728	0.185
8234	"ENSG00000153827"	"TRIP12"	chr2	-	229805729	229805883	229805729	229805802	229807707	229807864	8234	24,17,33	2,4,0	25,11,17	11,2,5	230	149	0.0026419	0.0842042	0.886,0.734,1.0	0.596,0.781,0.688	0.185
8923	"ENSG00000127124"	"HIVEP3"	chr1	-	41506364	41511266	41506364	41511263	41512815	41513750	8923	1,4,3	1,0,0	3,4,2	1,0,8	152	149	0.002528	0.0826806	0.495,1.0,1.0	0.746,1.0,0.197	0.184
10934	"ENSG00000102081"	"FMR1"	chrX	+	147944868	147945051	147944943	147945051	147943130	147943326	10934	6,8,18	0,0,0	13,16,8	1,1,3	224	149	0.0218999	0.314906	1.0,1.0,1.0	0.896,0.914,0.639	0.184
10781	"ENSG00000068745"	"IP6K2"	chr3	-	48695089	48695421	48695089	48695418	48715314	48715527	10781	2,3,5	7,14,9	0,2,0	8,8,2	152	149	0.00147024	0.0570318	0.219,0.174,0.353	0.0,0.197,0.0	0.183
2144	"ENSG00000130177"	"CDC16"	chr13	+	114236798	114236896	114236801	114236896	114236644	114236699	2144	13,26,23	0,1,3	17,18,22	6,8,3	152	149	0.000539728	0.027008	1.0,0.962,0.883	0.735,0.688,0.878	0.181
3962	"ENSG00000140853"	"NLRC5"	chr16	+	57055432	57055519	57055435	57055519	57055031	57055094	3962	1,4,2	4,5,5	2,0,1	6,1,6	152	149	0.0475033	0.489536	0.197,0.44,0.282	0.246,0.0,0.14	0.178
592	"ENSG00000064687"	"ABCA7"	chr19	+	1056906	1058747	1058617	1058747	1056329	1056499	592	31,84,88	1,1,3	26,62,75	8,3,10	298	149	0.000135425	0.0111093	0.939,0.977,0.936	0.619,0.912,0.789	0.177
5871	"ENSG00000100802"	"C14orf93"	chr14	-	22999053	22999402	22999053	22999156	23000958	23001037	5871	7,15,5	1,2,0	14,7,5	7,0,2	298	149	0.0287452	0.368823	0.778,0.789,1.0	0.5,1.0,0.556	0.17
5687	"ENSG00000135365"	"PHF21A"	chr11	-	45945839	45946098	45945839	45946003	45948885	45948946	5687	4,6,4	9,26,12	0,0,0	25,16,16	244	149	8.15908e-07	0.000263181	0.213,0.124,0.169	0.0,0.0,0.0	0.169
1202	"ENSG00000167840"	"ZNF232"	chr17	-	5109393	5109868	5109393	5109768	5111075	5111219	1202	6,9,14	0,0,0	15,20,26	5,2,0	249	149	0.000848407	0.0374966	1.0,1.0,1.0	0.642,0.857,1.0	0.167
5783	"ENSG00000120254"	"MTHFD1L"	chr6	+	150887841	150887981	150887844	150887981	150885633	150885734	5783	62,57,32	26,36,4	57,48,34	45,35,25	152	149	0.0202505	0.300108	0.7,0.608,0.887	0.554,0.573,0.571	0.166
6462	"ENSG00000138381"	"ASNSD1"	chr2	+	189665375	189665451	189665421	189665451	189663900	189663954	6462	29,14,17	2,0,0	13,7,17	4,1,2	195	149	0.00175778	0.064676	0.917,1.0,1.0	0.713,0.842,0.867	0.165
2177	"ENSG00000088387"	"DOCK9"	chr13	-	98845923	98846060	98845923	98845991	98848591	98848639	2177	19,6,7	0,1,0	12,4,7	3,2,0	218	149	0.0128747	0.235128	1.0,0.804,1.0	0.732,0.578,1.0	0.165
3108	"ENSG00000172269"	"DPAGT1"	chr11	-	119100629	119100877	119100629	119100827	119101017	119101138	3108	8,6,4	0,0,1	7,5,6	1,5,0	199	149	0.0038628	0.107986	1.0,1.0,0.75	0.84,0.428,1.0	0.161
7736	"ENSG00000159069"	"FBXW5"	chr9	-	136942768	136943003	136942768	136942973	136943348	136943506	7736	2,8,1	5,8,7	1,1,1	18,6,4	179	149	0.00251867	0.0826806	0.25,0.454,0.106	0.044,0.122,0.172	0.157
10823	"ENSG00000090539"	"CHRD"	chr3	+	184389366	184389829	184389369	184389829	184388892	184388995	10823	38,45,51	2,3,11	38,41,43	16,7,19	152	149	0.00131406	0.0538979	0.949,0.936,0.82	0.7,0.852,0.689	0.155
8977	"ENSG00000136425"	"CIB2"	chr15	-	78109234	78109509	78109234	78109382	78110655	78110733	8977	53,36,33	2,4,1	54,26,29	11,13,0	276	149	0.0188994	0.291891	0.935,0.829,0.947	0.726,0.519,1.0	0.155
323	"ENSG00000075702"	"WDR62"	chr19	+	36102736	36102851	36102751	36102851	36102013	36102151	323	36,47,29	5,17,10	50,38,13	25,20,9	164	149	0.0235853	0.326928	0.867,0.715,0.725	0.645,0.633,0.568	0.154
6805	"ENSG00000126246"	"IGFLR1"	chr19	-	35739709	35740088	35739709	35740086	35740379	35740564	6805	72,49,40	8,5,1	107,35,15	14,11,7	151	149	0.0051818	0.130958	0.899,0.906,0.975	0.883,0.758,0.679	0.153
1443	"ENSG00000169951"	"ZNF764"	chr16	-	30553763	30556110	30553763	30556107	30557732	30557846	1443	4,4,9	13,10,24	3,1,0	7,22,11	152	149	0.00385353	0.107986	0.232,0.282,0.269	0.296,0.043,0.0	0.148
10055	"ENSG00000164970"	"FAM219A"	chr9	-	34398183	34401122	34398183	34401119	34401665	34401720	10055	57,89,112	18,9,46	52,59,74	27,35,38	152	149	0.00309574	0.0938852	0.756,0.906,0.705	0.654,0.623,0.656	0.145
6331	"ENSG00000102312"	"PORCN"	chrX	+	48511294	48511487	48511365	48511487	48509783	48509956	6331	29,33,28	1,1,11	27,31,28	8,12,5	220	149	0.0487757	0.496085	0.952,0.957,0.633	0.696,0.636,0.791	0.14
7096	"ENSG00000132563"	"REEP2"	chr5	+	138445227	138445375	138445233	138445375	138444753	138444867	7096	38,65,42	6,5,1	41,59,51	12,11,17	155	149	0.000249898	0.0164538	0.859,0.926,0.976	0.767,0.838,0.743	0.138
1556	"ENSG00000059122"	"FLYWCH1"	chr16	+	2930409	2930880	2930412	2930880	2929612	2930010	1556	104,147,194	20,53,51	93,123,126	57,55,66	152	149	0.000131117	0.0109406	0.836,0.731,0.789	0.615,0.687,0.652	0.134
4913	"ENSG00000184060"	"ADAP2"	chr17	+	30926808	30926918	30926826	30926918	30922939	30923070	4913	0,6,0	4,8,10	0,0,0	4,9,12	167	149	0.0126645	0.232876	0.0,0.401,0.0	0.0,0.0,0.0	0.134
8339	"ENSG00000221978"	"CCNL2"	chr1	-	1390765	1392803	1390765	1390865	1393395	1393460	8339	43,86,76	18,52,45	36,67,50	30,45,73	298	149	0.0157459	0.263521	0.544,0.453,0.458	0.375,0.427,0.255	0.133
1981	"ENSG00000119616"	"FCF1"	chr14	+	74715820	74716099	74715993	74716099	74714871	74714943	1981	18,11,11	1,0,0	11,9,18	0,1,4	298	149	0.0138081	0.243294	0.9,1.0,1.0	1.0,0.818,0.692	0.13
1580	"ENSG00000138834"	"MAPK8IP3"	chr16	+	1743331	1743476	1743334	1743476	1729486	1729578	1580	19,18,29	22,38,45	9,10,10	24,36,24	152	149	0.0279529	0.362374	0.458,0.317,0.387	0.269,0.214,0.29	0.13
1831	"ENSG00000137802"	"MAPKBP1"	chr15	+	41815258	41815799	41815623	41815799	41814549	41814739	1831	24,50,60	0,0,0	31,42,58	3,4,2	298	149	0.000159783	0.0126913	1.0,1.0,1.0	0.838,0.84,0.935	0.129
1309	"ENSG00000205084"	"TMEM231"	chr16	-	75545825	75546077	75545825	75545954	75555803	75555973	1309	6,0,2	2,15,6	2,0,1	2,13,14	272	149	0.0418229	0.456947	0.622,0.0,0.154	0.354,0.0,0.038	0.128
2863	"ENSG00000171206"	"TRIM8"	chr10	+	102656244	102656385	102656247	102656385	102656105	102656137	2863	6,6,9	0,1,2	10,7,5	4,5,0	152	149	0.0179709	0.287304	1.0,0.855,0.815	0.71,0.578,1.0	0.127
1839	"ENSG00000140320"	"BAHD1"	chr15	+	40465334	40465435	40465343	40465435	40464470	40464547	1839	23,43,40	22,53,51	18,38,26	40,54,62	158	149	0.0260698	0.347322	0.496,0.433,0.425	0.298,0.399,0.283	0.125
870	"ENSG00000181045"	"SLC26A11"	chr17	+	80223251	80223337	80223290	80223337	80222654	80222847	870	19,33,33	0,0,1	12,13,40	2,2,2	188	149	0.0119023	0.224751	1.0,1.0,0.963	0.826,0.837,0.941	0.12
1010	"ENSG00000013306"	"SLC25A39"	chr17	-	44322418	44322552	44322418	44322528	44323283	44323343	1010	78,54,70	31,22,33	90,71,65	62,55,42	173	149	0.00533929	0.132924	0.684,0.679,0.646	0.556,0.526,0.571	0.119
1902	"ENSG00000022976"	"ZNF839"	chr14	+	102341322	102342364	102342102	102342364	102339093	102339223	1902	17,66,33	0,4,0	35,42,24	1,4,4	298	149	0.0297168	0.372689	1.0,0.892,1.0	0.946,0.84,0.75	0.119
1245	"ENSG00000140995"	"DEF8"	chr16	+	89957537	89957660	89957540	89957660	89955168	89955266	1245	37,54,62	4,7,8	18,38,38	4,23,5	152	149	0.0175753	0.285353	0.901,0.883,0.884	0.815,0.618,0.882	0.118
6096	"ENSG00000204120"	"GIGYF2"	chr2	+	232790697	232790915	232790715	232790915	232787149	232787329	6096	33,42,48	1,1,0	33,24,25	8,1,4	167	149	1.88543e-05	0.00336953	0.967,0.974,1.0	0.786,0.955,0.848	0.117
10858	"ENSG00000129451"	"KLK10"	chr19	-	51019042	51019142	51019042	51019139	51019626	51019709	10858	21,15,7	56,40,25	11,17,3	98,62,27	152	149	0.00710952	0.160978	0.269,0.269,0.215	0.099,0.212,0.098	0.115
6183	"ENSG00000185686"	"PRAME"	chr22	-	22556811	22556930	22556811	22556909	22557544	22557580	6183	42,56,66	13,27,24	35,37,39	21,18,33	170	149	0.0374551	0.431855	0.739,0.645,0.707	0.594,0.643,0.509	0.115
8938	"ENSG00000247828"	"TMEM161B-AS1"	chr5	+	88285740	88285851	88285743	88285851	88282714	88282866	8938	0,3,3	1,2,1	0,0,2	1,1,0	152	149	0.0287334	0.368823	0.0,0.595,0.746	0.0,0.0,1.0	0.114
1358	"ENSG00000196155"	"PLEKHG4"	chr16	+	67288475	67288604	67288488	67288604	67288166	67288400	1358	0,2,4	6,11,9	0,1,0	16,9,6	162	149	0.00434644	0.117099	0.0,0.143,0.29	0.0,0.093,0.0	0.113
4810	"ENSG00000135424"	"ITGA7"	chr12	-	55696898	55697068	55696898	55697050	55697215	55697277	4810	4,24,10	0,1,0	13,19,33	0,9,1	167	149	0.000822724	0.0367581	1.0,0.955,1.0	1.0,0.653,0.967	0.112
7349	"ENSG00000117407"	"ARTN"	chr1	+	43936068	43936231	43936092	43936231	43935589	43935716	7349	46,39,34	41,33,52	42,26,20	66,37,42	173	149	0.0471416	0.489536	0.491,0.504,0.36	0.354,0.377,0.291	0.111
3795	"ENSG00000204054"	"LINC00963"	chr9	+	129493415	129493595	129493418	129493595	129489125	129489299	3795	4,12,5	21,38,40	2,3,2	34,37,43	152	149	0.00173402	0.0642744	0.157,0.236,0.109	0.055,0.074,0.044	0.11
6968	"ENSG00000131697"	"NPHP4"	chr1	-	5905631	5905783	5905631	5905780	5909151	5909213	6968	0,1,8	2,2,8	2,0,0	2,5,2	152	149	0.0058561	0.143608	0.0,0.329,0.495	0.495,0.0,0.0	0.11
2769	"ENSG00000111206"	"FOXM1"	chr12	-	2872095	2872247	2872095	2872244	2873976	2874525	2769	68,83,38	29,44,25	83,67,45	80,54,34	152	149	0.00744439	0.162517	0.697,0.649,0.598	0.504,0.549,0.565	0.109
5775	"ENSG00000123562"	"MORF4L2"	chrX	-	103678498	103678651	103678498	103678620	103685170	103685260	5775	90,61,81	2,6,9	80,66,39	14,9,11	180	149	0.00273707	0.0861403	0.974,0.894,0.882	0.825,0.859,0.746	0.107
10650	"ENSG00000126883"	"NUP214"	chr9	+	131146128	131146304	131146161	131146304	131144279	131144754	10650	12,29,43	1,1,3	28,27,24	1,6,7	182	149	0.0150538	0.25712	0.908,0.96,0.921	0.958,0.787,0.737	0.102
10546	"ENSG00000146904"	"EPHA1"	chr7	-	143398320	143398945	143398320	143398448	143399257	143399413	10546	12,51,39	0,3,0	18,26,49	0,3,7	298	149	0.00460856	0.119656	1.0,0.895,1.0	1.0,0.813,0.778	0.101
998	"ENSG00000172992"	"DCAKD"	chr17	-	45034773	45035002	45034773	45034999	45051552	45051661	998	2,1,1	22,5,6	0,1,0	20,11,8	152	149	0.0335772	0.401962	0.082,0.164,0.14	0.0,0.082,0.0	0.101
4662	"ENSG00000023330"	"ALAS1"	chr3	+	52199209	52199440	52199220	52199440	52198671	52198848	4662	56,119,131	1,4,6	53,74,110	10,15,6	160	149	9.86815e-05	0.0094962	0.981,0.965,0.953	0.832,0.821,0.945	0.1
5988	"ENSG00000114982"	"KANSL3"	chr2	-	96604778	96604863	96604778	96604857	96605319	96605511	5988	14,29,14	1,0,0	26,55,25	0,3,11	155	149	0.000282495	0.0176701	0.931,1.0,1.0	1.0,0.946,0.686	0.1
8913	"ENSG00000112983"	"BRD8"	chr5	-	138166517	138166727	138166517	138166610	138167933	138168078	8913	39,41,30	9,2,0	37,60,23	0,0,1	266	149	0.000105352	0.00958512	0.708,0.92,1.0	1.0,1.0,0.928	-0.1
11153	"ENSG00000204344"	"STK19"	chr6	+	31979413	31980548	31980450	31980548	31978902	31978998	11153	35,73,65	5,0,7	66,62,57	0,0,3	298	149	0.00122565	0.0511096	0.778,1.0,0.823	1.0,1.0,0.905	-0.101
10977	"ENSG00000148200"	"NR6A1"	chr9	-	124538091	124538319	124538091	124538316	124540032	124540187	10977	7,8,14	0,1,6	3,1,8	0,0,1	152	149	0.00231042	0.0781173	1.0,0.887,0.696	1.0,1.0,0.887	-0.101
9113	"ENSG00000125089"	"SH3TC1"	chr4	+	8233291	8233513	8233362	8233513	8231975	8232156	9113	0,0,2	10,16,14	5,2,0	9,10,7	220	149	0.00516976	0.130958	0.0,0.0,0.088	0.273,0.119,0.0	-0.101
668	"ENSG00000196756"	"SNHG17"	chr20	-	38421005	38422368	38421005	38422241	38426418	38426503	668	2,1,0	7,12,3	0,3,5	12,11,5	276	149	0.0467872	0.489536	0.134,0.043,0.0	0.0,0.128,0.351	-0.101
5242	"ENSG00000168036"	"CTNNB1"	chr3	+	41239659	41239904	41239818	41239904	41239133	41239354	5242	77,119,165	93,115,175	117,151,157	81,111,101	298	149	0.00113065	0.0475443	0.293,0.341,0.32	0.419,0.405,0.437	-0.102
4663	"ENSG00000041880"	"PARP3"	chr3	+	51943348	51943538	51943353	51943538	51942936	51943046	4663	3,28,23	0,4,5	26,3,31	0,0,0	154	149	6.26675e-05	0.00696863	1.0,0.871,0.817	1.0,1.0,1.0	-0.104
2405	"ENSG00000111344"	"RASAL1"	chr12	-	113105713	113105886	113105713	113105883	113107096	113107241	2405	33,29,37	0,12,4	61,45,41	0,4,0	152	149	0.000403858	0.0212727	1.0,0.703,0.901	1.0,0.917,1.0	-0.104
1991	"ENSG00000103037"	"SETD6"	chr16	+	58518019	58518231	58518180	58518231	58516807	58516928	1991	17,30,20	1,1,3	12,28,24	0,1,0	298	149	0.0274061	0.358723	0.895,0.938,0.769	1.0,0.933,1.0	-0.11
1374	"ENSG00000131944"	"FAAP24"	chr19	+	32973425	32973562	32973483	32973562	32973183	32973302	1374	6,17,2	1,2,2	5,3,4	0,1,1	207	149	0.0316602	0.39118	0.812,0.86,0.419	1.0,0.683,0.742	-0.111
6792	"ENSG00000143442"	"POGZ"	chr1	-	151427822	151428041	151427822	151428014	151428122	151428413	6792	25,26,23	2,5,2	28,33,39	0,0,1	176	149	0.000289097	0.0178598	0.914,0.815,0.907	1.0,1.0,0.971	-0.112
1590	"ENSG00000196557"	"CACNA1H"	chr16	+	1218969	1219130	1219002	1219130	1218209	1218651	1590	30,54,49	5,15,15	34,52,33	2,4,7	182	149	0.00822768	0.170835	0.831,0.747,0.728	0.933,0.914,0.794	-0.112
765	"ENSG00000141644"	"MBD1"	chr18	-	50274185	50274353	50274185	50274350	50274976	50275045	765	18,39,62	4,7,0	25,27,45	0,0,0	152	149	0.000131182	0.0109406	0.815,0.845,1.0	1.0,1.0,1.0	-0.113
6913	"ENSG00000077454"	"LRCH4"	chr7	-	100574010	100575304	100574010	100574356	100575704	100575782	6913	122,109,122	13,17,34	140,148,161	7,6,29	298	149	0.0138035	0.243294	0.824,0.762,0.642	0.909,0.925,0.735	-0.114
11250	"ENSG00000104529"	"EEF1D"	chr8	-	143590607	143590738	143590607	143590735	143597347	143597415	11250	33,17,11	8,5,0	21,16,11	0,0,1	152	149	4.24475e-05	0.00496926	0.802,0.769,1.0	1.0,1.0,0.915	-0.115
4796	"ENSG00000154814"	"OXNAD1"	chr3	+	16270928	16271071	16270944	16271071	16269125	16269275	4796	1,0,0	9,7,17	1,1,3	5,11,10	165	149	0.0328206	0.396701	0.091,0.0,0.0	0.153,0.076,0.213	-0.117
7487	"ENSG00000159214"	"CCDC24"	chr1	+	43992152	43992387	43992211	43992387	43991846	43992004	7487	11,7,16	23,22,34	30,12,13	30,21,18	208	149	0.0329605	0.397433	0.255,0.186,0.252	0.417,0.29,0.341	-0.118
1478	"ENSG00000168488"	"ATXN2L"	chr16	+	28835545	28835758	28835554	28835758	28835277	28835399	1478	24,41,27	8,0,4	37,44,32	0,0,1	158	149	4.27014e-05	0.00496926	0.739,1.0,0.864	1.0,1.0,0.968	-0.122
7169	"ENSG00000137074"	"APTX"	chr9	-	32987543	32987846	32987543	32987731	32988082	32988124	7169	53,123,132	18,33,22	74,131,148	15,13,14	264	149	0.00579041	0.142735	0.624,0.678,0.772	0.736,0.85,0.856	-0.123
3814	"ENSG00000171097"	"KYAT1"	chr9	-	128845352	128845517	128845352	128845411	128846679	128846859	3814	0,0,0	5,1,4	0,5,0	2,5,2	255	149	0.0483096	0.493349	0.0,0.0,0.0	0.0,0.369,0.0	-0.123
730	"ENSG00000088881"	"EBF4"	chr20	+	2755626	2755824	2755742	2755824	2752356	2752545	730	15,22,10	5,1,0	33,28,22	0,0,1	265	149	0.00418941	0.114556	0.628,0.925,1.0	1.0,1.0,0.925	-0.124
9956	"ENSG00000130023"	"ERMARD"	chr6	+	169755282	169755422	169755287	169755422	169753863	169754032	9956	5,7,17	0,6,0	2,10,8	0,1,0	154	149	0.0247156	0.335168	1.0,0.53,1.0	1.0,0.906,1.0	-0.125
9423	"ENSG00000075303"	"SLC25A40"	chr7	-	87856291	87856389	87856291	87856351	87858630	87858751	9423	1,0,0	9,16,12	8,2,0	10,21,3	187	149	0.00028186	0.0176701	0.081,0.0,0.0	0.389,0.071,0.0	-0.126
1233	"ENSG00000141013"	"GAS8"	chr16	+	90031175	90031496	90031189	90031496	90027635	90027722	1233	0,3,0	1,0,1	0,3,4	1,1,2	163	149	0.0473873	0.489536	0.0,1.0,0.0	0.0,0.733,0.646	-0.126
7554	"ENSG00000175854"	"SWI5"	chr9	+	128276586	128276755	128276706	128276755	128275438	128275496	7554	15,24,23	1,2,6	20,13,27	0,0,3	269	149	0.00719944	0.161078	0.893,0.869,0.68	1.0,1.0,0.833	-0.13
3291	"ENSG00000172663"	"TMEM134"	chr11	-	67467500	67467590	67467500	67467563	67468016	67468092	3291	34,37,46	10,15,14	53,26,39	9,4,5	176	149	0.00860304	0.17429	0.742,0.676,0.736	0.833,0.846,0.868	-0.131
3451	"ENSG00000213593"	"TMX2"	chr11	+	57737785	57738026	57737835	57738026	57737607	57737668	3451	0,0,0	15,29,12	7,3,0	12,22,4	199	149	2.57452e-05	0.00415577	0.0,0.0,0.0	0.304,0.093,0.0	-0.132
1713	"ENSG00000140400"	"MAN2C1"	chr15	-	75356300	75356449	75356300	75356380	75356605	75356685	1713	34,37,47	11,3,9	80,41,36	0,6,2	218	149	0.00137361	0.0554317	0.679,0.894,0.781	1.0,0.824,0.925	-0.132
10979	"ENSG00000136051"	"WASHC4"	chr12	+	105121088	105121204	105121100	105121204	105120554	105120597	10979	1,0,0	9,4,1	8,0,0	7,3,3	161	149	0.00629975	0.150282	0.093,0.0,0.0	0.514,0.0,0.0	-0.14
4838	"ENSG00000163701"	"IL17RE"	chr3	+	9914474	9914599	9914547	9914599	9913955	9914024	4838	3,2,7	17,18,31	7,10,5	10,18,20	222	149	0.0186146	0.289531	0.106,0.069,0.132	0.32,0.272,0.144	-0.143
8649	"ENSG00000143537"	"ADAM15"	chr1	+	155061414	155061489	155061417	155061489	155060762	155060832	8649	76,41,30	66,56,51	89,35,45	76,28,23	152	149	0.0237456	0.32824	0.53,0.418,0.366	0.534,0.551,0.657	-0.143
237	"ENSG00000104872"	"PIH1D1"	chr19	-	49447337	49447420	49447337	49447417	49447826	49447908	237	8,12,9	6,0,0	8,10,2	0,0,0	152	149	0.0154253	0.260771	0.567,1.0,1.0	1.0,1.0,1.0	-0.144
5591	"ENSG00000092758"	"COL9A3"	chr20	+	62836186	62836532	62836477	62836532	62835920	62835953	5591	8,36,38	1,3,2	17,46,59	0,0,0	298	149	0.00717525	0.161078	0.8,0.857,0.905	1.0,1.0,1.0	-0.146
1199	"ENSG00000161939"	"RNASEK-C17orf49"	chr17	+	7017256	7017520	7017260	7017520	7016494	7016685	1199	43,50,16	15,6,7	53,48,25	14,0,0	153	149	0.0104968	0.203589	0.736,0.89,0.69	0.787,1.0,1.0	-0.157
8313	"ENSG00000244462"	"RBM12"	chr20	-	35658929	35659014	35658929	35658982	35664801	35664889	8313	16,12,8	0,1,9	5,12,7	1,0,0	181	149	0.00199916	0.071697	1.0,0.908,0.423	0.805,1.0,1.0	-0.158
9628	"ENSG00000137216"	"TMEM63B"	chr6	+	44134419	44134743	44134560	44134743	44127719	44127866	9628	3,0,4	12,16,7	2,6,9	8,6,8	290	149	0.009232	0.184052	0.114,0.0,0.227	0.114,0.339,0.366	-0.159
7983	"ENSG00000135164"	"DMTF1"	chr7	+	87182016	87182337	87182227	87182337	87181308	87181341	7983	0,0,0	1,1,1	4,0,1	5,4,2	298	149	0.0325747	0.396602	0.0,0.0,0.0	0.286,0.0,0.2	-0.162
3083	"ENSG00000150433"	"TMEM218"	chr11	-	125102131	125102351	125102131	125102317	125102733	125102809	3083	1,0,0	5,16,14	2,3,3	18,12,4	183	149	0.000670702	0.0310758	0.14,0.0,0.0	0.083,0.169,0.379	-0.164
9832	"ENSG00000135597"	"REPS1"	chr6	-	138917554	138917627	138917554	138917624	138920214	138920316	9832	13,26,24	12,9,11	30,51,40	7,14,7	152	149	0.0198771	0.299961	0.515,0.739,0.681	0.808,0.781,0.849	-0.168
4256	"ENSG00000156304"	"SCAF4"	chr21	-	31685048	31685240	31685048	31685174	31685397	31685484	4256	25,35,37	8,5,5	26,37,40	2,1,0	215	149	2.12422e-05	0.00354321	0.684,0.829,0.837	0.9,0.962,1.0	-0.171
10986	"ENSG00000150776"	"NKAPD1"	chr11	+	112082464	112085150	112082467	112085150	112081981	112082035	10986	17,5,7	0,4,1	18,7,11	1,0,0	152	149	0.0319177	0.392423	1.0,0.551,0.873	0.946,1.0,1.0	-0.174
9173	"ENSG00000185619"	"PCGF3"	chr4	+	732399	732498	732443	732498	730969	731110	9173	32,29,9	3,6,7	11,12,11	1,0,2	193	149	0.00532902	0.132924	0.892,0.789,0.498	0.895,1.0,0.809	-0.175
2232	"ENSG00000136108"	"CKAP2"	chr13	+	52460895	52460974	52460898	52460974	52456522	52456607	2232	4,0,0	16,11,8	24,1,3	30,30,8	152	149	0.0135386	0.243294	0.197,0.0,0.0	0.44,0.032,0.269	-0.181
2887	"ENSG00000139218"	"SCAF11"	chr12	-	45919130	45922194	45919130	45919309	45922462	45922582	2887	40,14,28	1,8,2	18,28,13	0,0,1	298	149	0.000180753	0.0139152	0.952,0.467,0.875	1.0,1.0,0.867	-0.191
6434	"ENSG00000134644"	"PUM1"	chr1	-	30965981	30966278	30965981	30966197	30967166	30967310	6434	46,25,48	5,9,11	38,32,25	2,0,2	230	149	8.80193e-05	0.00898875	0.856,0.643,0.739	0.925,1.0,0.89	-0.192
6145	"ENSG00000184599"	"TAFA3"	chr1	+	112723944	112724137	112724012	112724137	112723015	112723165	6145	0,0,1	4,2,0	4,0,5	2,1,0	217	149	0.000643424	0.0303744	0.0,0.0,1.0	0.579,0.0,1.0	-0.193
2314	"ENSG00000183570"	"PCBP3"	chr21	+	45929916	45929995	45929919	45929995	45917587	45917629	2314	8,15,13	7,6,4	11,23,7	0,5,2	152	149	0.0228128	0.321075	0.528,0.71,0.761	1.0,0.818,0.774	-0.198
1057	"ENSG00000275066"	"SYNRG"	chr17	-	37596222	37596344	37596222	37596341	37600362	37600403	1057	5,3,7	8,1,1	2,3,3	0,0,2	152	149	0.00361475	0.105164	0.38,0.746,0.873	1.0,1.0,0.595	-0.199
7164	"ENSG00000197989"	"SNHG12"	chr1	-	28579532	28579981	28579532	28579587	28581589	28581873	7164	32,33,21	3,5,3	13,22,32	0,0,0	298	149	3.27912e-06	0.000863618	0.842,0.767,0.778	1.0,1.0,1.0	-0.204
6800	"ENSG00000117523"	"PRRC2C"	chr1	+	171512994	171513172	171513000	171513172	171512031	171512200	6800	14,16,15	2,7,3	22,22,5	0,0,0	155	149	8.94098e-07	0.000263181	0.871,0.687,0.828	1.0,1.0,1.0	-0.205
7127	"ENSG00000197283"	"SYNGAP1"	chr6	+	33446574	33446786	33446580	33446786	33444443	33444617	7127	5,9,8	1,12,3	18,11,9	2,0,4	155	149	0.0179142	0.287304	0.828,0.419,0.719	0.896,1.0,0.684	-0.205
5984	"ENSG00000090686"	"USP48"	chr1	-	21721035	21721166	21721035	21721163	21721649	21721764	5984	30,6,11	6,3,11	16,34,8	2,6,1	152	149	0.0199135	0.299961	0.831,0.662,0.495	0.887,0.847,0.887	-0.211
10368	"ENSG00000087085"	"ACHE"	chr7	-	100893164	100894255	100893164	100894252	100895801	100895888	10368	0,0,2	3,6,3	0,2,3	2,1,5	152	149	0.0223589	0.320521	0.0,0.0,0.395	0.0,0.662,0.37	-0.212
5555	"ENSG00000167965"	"MLST8"	chr16	+	2206478	2206659	2206483	2206659	2206357	2206409	5555	15,16,7	2,9,2	37,24,18	3,0,0	154	149	2.9996e-05	0.00448493	0.879,0.632,0.772	0.923,1.0,1.0	-0.213
4330	"ENSG00000121274"	"TENT4B"	chr16	+	50225097	50225285	50225238	50225285	50224890	50224994	4330	8,19,5	0,2,6	21,27,8	1,2,0	290	149	0.0202711	0.300108	1.0,0.83,0.3	0.915,0.874,1.0	-0.22
2703	"ENSG00000196388"	"INCA1"	chr17	-	4989427	4989624	4989427	4989579	4989889	4989929	2703	1,11,2	0,2,3	12,6,6	2,0,0	194	149	0.0160686	0.267133	1.0,0.809,0.339	0.822,1.0,1.0	-0.225
7933	"ENSG00000166924"	"NYAP1"	chr7	+	100490513	100490729	100490516	100490729	100488151	100489666	7933	0,3,2	6,10,12	2,5,4	10,6,5	152	149	0.033471	0.401652	0.0,0.227,0.14	0.164,0.45,0.44	-0.229
10828	"ENSG00000162869"	"PPP1R21"	chr2	+	48454555	48454741	48454594	48454741	48451007	48451076	10828	0,0,0	3,7,6	0,2,4	5,3,6	188	149	0.00167994	0.0627344	0.0,0.0,0.0	0.0,0.346,0.346	-0.231
1417	"ENSG00000129455"	"KLK8"	chr19	-	51000423	51000718	51000423	51000583	51001097	51001175	1417	40,35,11	75,70,62	71,79,37	75,52,24	284	149	2.16596e-07	9.85314e-05	0.219,0.208,0.085	0.332,0.444,0.447	-0.237
8861	"ENSG00000105699"	"LSR"	chr19	+	35266835	35266967	35266838	35266967	35258944	35259064	8861	4,11,2	0,0,5	1,8,11	0,0,0	152	149	0.0496374	0.502804	1.0,1.0,0.282	1.0,1.0,1.0	-0.239
4757	"ENSG00000103034"	"NDRG4"	chr16	+	58503743	58503903	58503797	58503903	58500987	58501077	4757	1,0,0	2,13,15	6,0,0	0,14,13	203	149	0.0480492	0.491694	0.268,0.0,0.0	1.0,0.0,0.0	-0.244
1823	"ENSG00000140326"	"CDAN1"	chr15	-	42735874	42736081	42735874	42736078	42736301	42736780	1823	3,22,24	20,12,36	15,18,34	7,11,21	152	149	0.0297077	0.372689	0.128,0.642,0.395	0.677,0.616,0.613	-0.247
7716	"ENSG00000158806"	"NPM2"	chr8	+	22024723	22025306	22025215	22025306	22024133	22024623	7716	4,9,15	3,1,1	8,15,11	0,0,1	298	149	0.00504932	0.128912	0.4,0.818,0.882	1.0,1.0,0.846	-0.249
8564	"ENSG00000068971"	"PPP2R5B"	chr11	+	64925470	64925933	64925847	64925933	64922984	64923102	8564	19,25,41	6,4,7	15,31,48	0,2,0	298	149	1.53122e-06	0.000425679	0.613,0.758,0.745	1.0,0.886,1.0	-0.257
4976	"ENSG00000144034"	"TPRKB"	chr2	-	73734428	73734591	73734428	73734588	73737301	73737400	4976	196,10,11	74,15,20	101,59,43	46,14,14	152	149	0.0136556	0.243294	0.722,0.395,0.35	0.683,0.805,0.751	-0.257
8290	"ENSG00000004897"	"CDC27"	chr17	-	47141852	47142025	47141852	47142022	47142228	47142436	8290	5,9,7	23,9,21	18,15,14	15,15,7	152	149	0.00577176	0.142735	0.176,0.495,0.246	0.541,0.495,0.662	-0.26
9613	"ENSG00000197798"	"FAM118B"	chr11	+	126261424	126261484	126261427	126261484	126256566	126256852	9613	17,9,26	12,14,12	12,33,38	2,10,8	152	149	0.00216968	0.0759237	0.581,0.387,0.68	0.855,0.764,0.823	-0.265
2592	"ENSG00000167767"	"KRT80"	chr12	-	52168995	52171557	52168995	52171522	52171657	52171713	2592	0,0,17	9,21,6	8,12,8	1,17,17	184	149	0.022966	0.321075	0.0,0.0,0.696	0.866,0.364,0.276	-0.27
6532	"ENSG00000100341"	"PNPLA5"	chr22	-	43889324	43889538	43889324	43889495	43891687	43892013	6532	0,1,1	2,4,0	4,3,0	0,0,7	192	149	0.00126368	0.05226	0.0,0.162,1.0	1.0,1.0,0.0	-0.279
6753	"ENSG00000151276"	"MAGI1"	chr3	-	65375744	65375948	65375744	65375945	65379260	65379554	6753	0,2,0	3,0,2	1,3,2	0,2,4	152	149	0.0204027	0.301166	0.0,1.0,0.0	1.0,0.595,0.329	-0.308
3793	"ENSG00000187239"	"FNBP1"	chr9	-	129923843	129924026	129923843	129923996	129924959	129925157	3793	10,9,10	6,2,12	5,7,16	0,0,5	179	149	0.00698802	0.159401	0.581,0.789,0.41	1.0,1.0,0.727	-0.316
2451	"ENSG00000028203"	"VEZT"	chr12	+	95270038	95270188	95270050	95270188	95266356	95266632	2451	3,3,1	8,7,7	11,11,9	5,12,9	161	149	0.00334103	0.098926	0.258,0.284,0.117	0.671,0.459,0.481	-0.317
11160	"ENSG00000154957"	"ZNF18"	chr17	-	11983296	11983407	11983296	11983404	11984112	11984197	11160	0,6,0	2,0,1	4,2,2	1,1,2	152	149	0.0476354	0.489536	0.0,1.0,0.0	0.797,0.662,0.495	-0.318
8255	"ENSG00000050426"	"LETMD1"	chr12	+	51053777	51053860	51053811	51053860	51049033	51049185	8255	8,12,3	6,15,7	11,7,9	2,3,3	183	149	0.00247486	0.0822659	0.521,0.394,0.259	0.817,0.655,0.71	-0.336
6216	"ENSG00000068366"	"ACSL4"	chrX	-	109683135	109683552	109683135	109683375	109696143	109696196	6216	0,0,3	10,5,4	7,6,3	4,4,2	298	149	1.70697e-05	0.00328525	0.0,0.0,0.273	0.467,0.429,0.429	-0.351
7300	"ENSG00000144228"	"SPOPL"	chr2	+	138550902	138551054	138550973	138551054	138550482	138550604	7300	7,5,5	7,5,0	11,14,3	0,1,0	220	149	1.29214e-05	0.0026941	0.404,0.404,1.0	1.0,0.905,1.0	-0.366
6485	"ENSG00000203705"	"TATDN3"	chr1	+	212812226	212812328	212812250	212812328	212807735	212807848	6485	3,1,3	8,4,2	5,6,2	0,2,3	173	149	0.0138063	0.243294	0.244,0.177,0.564	1.0,0.721,0.365	-0.367
628	"ENSG00000062598"	"ELMO2"	chr20	-	46394404	46394532	46394404	46394503	46398696	46398771	628	16,12,20	9,14,11	5,33,27	0,5,3	178	149	1.66279e-05	0.00328525	0.598,0.418,0.603	1.0,0.847,0.883	-0.37
4411	"ENSG00000161013"	"MGAT4B"	chr5	-	179801553	179801719	179801553	179801692	179801783	179801969	4411	0,2,3	8,11,16	5,4,5	2,8,6	176	149	0.000755353	0.0340521	0.0,0.133,0.137	0.679,0.297,0.414	-0.373
6471	"ENSG00000184908"	"CLCNKB"	chr1	+	16055674	16055758	16055677	16055758	16055434	16055523	6471	3,0,0	6,3,4	6,2,0	7,0,1	152	149	0.022853	0.321075	0.329,0.0,0.0	0.457,1.0,0.0	-0.376
232	"ENSG00000090554"	"FLT3LG"	chr19	+	49485963	49486231	49486014	49486231	49480297	49480476	232	1,1,4	2,0,2	4,3,2	0,0,0	200	149	0.0199228	0.299961	0.271,1.0,0.598	1.0,1.0,1.0	-0.377
6762	"ENSG00000217801"	"AL390719"	chr1	+	1060276	1060393	1060279	1060393	1059733	1059846	6762	0,8,0	3,1,4	1,13,5	0,9,5	152	149	0.0466795	0.489536	0.0,0.887,0.0	1.0,0.586,0.495	-0.398
1572	"ENSG00000103197"	"TSC2"	chr16	+	2079031	2079196	2079034	2079196	2077597	2077726	1572	12,16,15	6,9,15	19,27,20	0,0,0	152	149	1.26565e-13	3.16667e-10	0.662,0.635,0.495	1.0,1.0,1.0	-0.403
2952	"ENSG00000188603"	"CLN3"	chr16	-	28487455	28488662	28487455	28487541	28491481	28491560	2952	1,2,2	2,5,3	1,7,2	1,0,1	298	149	0.000299773	0.0182935	0.2,0.167,0.25	0.333,1.0,0.5	-0.405
5452	"ENSG00000161677"	"JOSD2"	chr19	-	50510285	50510448	50510285	50510445	50511074	50511159	5452	8,6,5	9,4,12	7,8,8	2,2,0	152	149	9.54539e-05	0.00942816	0.466,0.595,0.29	0.774,0.797,1.0	-0.407
7563	"ENSG00000134313"	"KIDINS220"	chr2	-	8812394	8812496	8812394	8812493	8813236	8813335	7563	0,1,0	4,7,2	6,0,2	1,3,2	152	149	0.000226326	0.0157297	0.0,0.123,0.0	0.855,0.0,0.495	-0.409
9447	"ENSG00000141458"	"NPC1"	chr18	-	23556242	23556664	23556242	23556613	23557116	23557190	9447	0,7,1	15,21,27	7,5,4	0,7,25	200	149	0.00721052	0.161078	0.0,0.199,0.027	1.0,0.347,0.107	-0.409
1006	"ENSG00000177989"	"ODF3B"	chr22	-	50531190	50531341	50531190	50531295	50531569	50531773	1006	7,1,0	3,3,3	7,1,1	3,1,0	195	149	0.0473427	0.489536	0.641,0.203,0.0	0.641,0.433,1.0	-0.41
5138	"ENSG00000119685"	"TTLL5"	chr14	+	75792912	75793100	75792915	75793100	75783146	75783530	5138	2,0,1	3,6,7	3,1,4	0,4,3	152	149	0.00289856	0.0895333	0.395,0.0,0.123	1.0,0.197,0.567	-0.415
916	"ENSG00000109065"	"NAT9"	chr17	-	74775621	74775852	74775621	74775707	74776270	74776361	916	0,11,4	3,0,1	6,1,1	0,0,0	294	149	0.0073978	0.162362	0.0,1.0,0.67	1.0,1.0,1.0	-0.443
4725	"ENSG00000184371"	"CSF1"	chr1	+	109923165	109924190	109924059	109924190	109921846	109921994	4725	0,6,8	1,2,2	2,5,10	0,0,3	298	149	0.0205834	0.3018	0.0,0.6,0.667	1.0,1.0,0.625	-0.453
1332	"ENSG00000184939"	"ZFP90"	chr16	+	68558374	68558568	68558472	68558568	68557997	68558124	1332	0,3,0	4,10,13	3,3,3	1,1,4	247	149	4.94281e-05	0.00562133	0.0,0.153,0.0	0.644,0.644,0.311	-0.482
10773	"ENSG00000081189"	"MEF2C"	chr5	-	88718273	88722925	88718273	88722829	88728492	88728628	10773	2,0,0	4,6,2	1,4,5	2,3,0	245	149	0.000104948	0.00958512	0.233,0.0,0.0	0.233,0.448,1.0	-0.483
7239	"ENSG00000153234"	"NR4A2"	chr2	-	156326149	156326328	156326149	156326207	156326717	156326920	7239	11,10,1	10,1,2	23,4,5	0,0,0	270	149	1.368e-07	7.26136e-05	0.378,0.847,0.216	1.0,1.0,1.0	-0.52
2350	"ENSG00000185684"	"EP400P1"	chr12	+	132104377	132105304	132104566	132105304	132103996	132104170	2350	1,3,3	2,5,0	2,1,10	0,0,0	298	149	1.18563e-05	0.00257951	0.2,0.231,1.0	1.0,1.0,1.0	-0.523
9092	"ENSG00000113108"	"APBB3"	chr5	-	140561586	140561722	140561586	140561701	140561843	140561849	9092	3,1,4	3,4,2	1,4,2	0,0,0	170	149	8.34343e-09	8.35011e-06	0.467,0.18,0.637	1.0,1.0,1.0	-0.572
6743	"ENSG00000138036"	"DYNC2LI1"	chr2	+	43795886	43795958	43795889	43795958	43794456	43794643	6743	9,0,2	16,6,11	4,8,4	1,0,2	152	149	5.77678e-07	0.000222362	0.355,0.0,0.151	0.797,1.0,0.662	-0.651
7537	"ENSG00000142046"	"TMEM91"	chr19	+	41383714	41384083	41383885	41384083	41382771	41382921	7537	0,3,9	1,5,2	6,1,1	0,0,0	298	149	6.13685e-08	5.11814e-05	0.0,0.231,0.692	1.0,1.0,1.0	-0.692
5627	"ENSG00000147421"	"HMBOX1"	chr8	+	29048953	29049048	29048956	29049048	29047357	29047453	5627	0,0,0	1,1,1	3,2,5	2,0,0	152	149	9.13714e-14	3.16667e-10	0.0,0.0,0.0	0.595,1.0,1.0	-0.865
